# Supplementary material for: 2,3-Unsubstituted chromones and their enaminone precursors as versatile reagents for the synthesis of fused pyridines
Source: Royal Society of Chemistry journal article supplement (doi:10.1039/c1ob06494k), 2011-10-27
Supplement: c1ob06494k.pdf [file c1ob06494k.pdf]

# Supporting Information

## 2,3-Unsubstituted chromones and their enaminone precursors as versatile reagents for the synthesis of fused pyridines

Viktor O. Iaroshenko,<sup>a,b\*</sup> Satenik Mkrtychyan,<sup>a</sup> Ashot Gevorgyan,<sup>a,c</sup> Mariia Miliutina,<sup>a</sup> Alexander Villinger,<sup>a</sup> Dmytro Volochnyuk,<sup>d</sup> Vyacheslav Ya. Sosnovskikh,<sup>e</sup> Peter Langer<sup>a,f\*</sup>

<sup>a</sup>*Institut für Chemie, Universität Rostock, Albert-Einstein-Str. 3a, 18059 Rostock, Germany. Fax: 00 49 381 49864112; Tel: 0049 381 4986410;  
E-mail: [viktor.iaroshenko@uni-rostock.de](mailto:viktor.iaroshenko@uni-rostock.de), [iva108@googlemail.com](mailto:iva108@googlemail.com).*

<sup>b</sup>*National Taras Shevchenko University, 62 Volodymyrska st., Kyiv-33, 01033, Ukraine.*

<sup>c</sup>*Faculty of Chemistry, Yerevan State University, Alex Manoogian 1, 0025 Yerevan, Armenia.*

<sup>d</sup>*“Enamine Ltd.” 23 A. Matrosova st., 01103 Kyiv, Ukraine.*

<sup>e</sup>*Department of Chemistry, Ural State University, 620083 Ekaterinburg, Russian Federation.*

<sup>f</sup>*Leibniz-Institut für Katalyse e. V. an der Universität Rostock, Albert-Einstein-Str. 29a, 18059 Rostock, Germany.*

### Table of Contents

|                                                                                           |         |
|-------------------------------------------------------------------------------------------|---------|
| (A) Experimental Section.....                                                             | 2–16    |
| (B) Spectral data.....                                                                    | 17–46   |
| (C) Copies of <sup>1</sup> H and <sup>13</sup> C NMR spectra.....                         | 47–142  |
| (D) X-ray single crystal analysis of compounds <b>15a</b> , <b>15c</b> , <b>17a</b> ..... | 143–145 |

## (A) Experimental Section

All solvents were purified and dried by standard methods. NMR spectra were recorded on a Bruker AV 300 and Bruker AV 400. The following abbreviations were used to designate chemical shift multiplicities: s = singlet, d = doublet, t = triplet, q = quartet, m = multiplet. IR spectra were recorded on a Perkin Elmer FT IR 1600 spectrometer (ATR). Mass spectra were obtained on a “Hewlett-Packard” HP GC / MS 5890 / 5972 instrument (EI, 70 eV) by GC inlet or on a MX-1321 instrument (EI, 70 eV) by direct inlet. Column chromatography was performed on silica gel (63–200 mesh, Merck). Silica gel Merck 60F<sub>254</sub> plates were used for TLC. Satisfactory microanalysis obtained C ± 0.33; H ± 0.45; N ± 0.25. Chemical yields refer to pure isolated substances.

**General procedure in DMF/TMSCl:** Corresponding chromone **1** or enaminones **2**, **25** (2 mmol) and amine (2.2 mmol) were placed in pressure tube under the flow of dry argon and dissolved in dry DMF (10 mL) containing 1 mL of TMSCl. The mixture was heated at 90–120 °C during 1–4 h (controlled by TLC). Then this solution was evaporated under reduced pressure, treated with water, filtrated, dried on the air, and recrystallized from an appropriate solvent, or was subjected to a column chromatography over silica gel.

For **21**: Compounds **1c,d** or **2c,d** (1 equiv.) and the corresponding amine **8** (1.1 equiv.) were dissolved in acetic acid (20 mL) and heated under reflux in an inert atmosphere during 2–3 h (controlled by TLC). Then this solution was evaporated under reduced pressure, treated with water, filtrated, dried on the air, and recrystallized from an appropriate solvent.

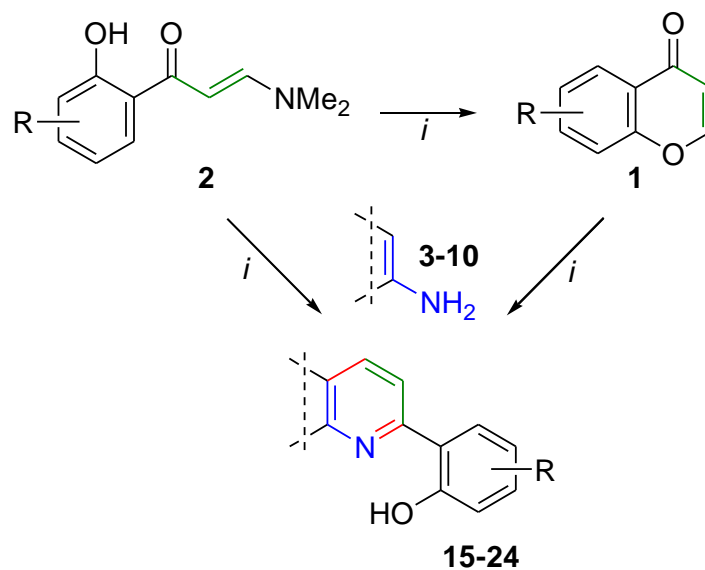

**Scheme 1.** Reagents and conditions: (i) DMF/TMSCl, under argon, 90–120 °C, 1–4 h.

**Table 1.** Synthesis of fused pyridines **15–24** from chromones **1** and aminoenones **2** (yields are in brackets).

| <b>3–10</b>  | <b>15–24</b>   | <b>Reaction conditions</b>        | <b>Yield (%)</b> |
|--------------|----------------|-----------------------------------|------------------|
| <br><b>3</b> | <br><b>15a</b> | <b>DMF/TMSCl,<br/>100 °C, 1 h</b> | 90 (86)          |

|                                                                                                     |                                                                                                       |                                          |                |
|-----------------------------------------------------------------------------------------------------|-------------------------------------------------------------------------------------------------------|------------------------------------------|----------------|
| <p><b>3</b></p> 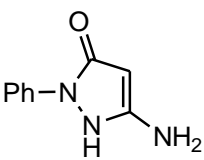   | <p><b>15b</b></p>    | <p><b>DMF/TMSCl,<br/>100 °C, 2 h</b></p> | <p>77 (78)</p> |
| <p><b>3</b></p>    | <p><b>15c</b></p>    | <p><b>DMF/TMSCl,<br/>90 °C, 1 h</b></p>  | <p>92 (90)</p> |
| <p><b>4</b></p>    | <p><b>16a</b></p>    | <p><b>DMF/TMSCl,<br/>90 °C, 1 h</b></p>  | <p>78 (75)</p> |
| <p><b>4</b></p>  | <p><b>16b</b></p>  | <p><b>AcOH, reflux, 1 h</b></p>          | <p>62 (60)</p> |



|                                                                                                      |                                                                                                       |                                   |         |
|------------------------------------------------------------------------------------------------------|-------------------------------------------------------------------------------------------------------|-----------------------------------|---------|
| 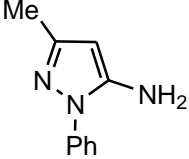 <p><b>5</b></p>    |  <p><b>17a</b></p>   | <b>DMF/TMSCl,<br/>100 °C, 2 h</b> | 97 (93) |
|  <p><b>5</b></p>    |  <p><b>17b</b></p>   | <b>DMF/TMSCl,<br/>100 °C, 2 h</b> | 92 (92) |
|  <p><b>5</b></p>    |  <p><b>17c</b></p>   | <b>DMF/TMSCl,<br/>90 °C, 1 h</b>  | 75 (74) |
|  <p><b>6a</b></p> |  <p><b>18a</b></p> | <b>DMF/TMSCl,<br/>100 °C, 1 h</b> | 90 (86) |

|                                                                                                      |                                                                                                        |                                   |         |
|------------------------------------------------------------------------------------------------------|--------------------------------------------------------------------------------------------------------|-----------------------------------|---------|
| 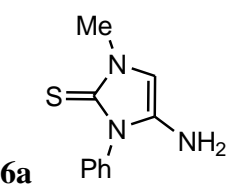 <p><b>6a</b></p>   |  <p><b>18b</b></p>   | <b>DMF/TMSCl,<br/>100 °C, 1 h</b> | 90 (89) |
|  <p><b>6b</b></p>   |  <p><b>18c</b></p>   | <b>DMF/TMSCl,<br/>90 °C, 4 h</b>  | 68      |
|  <p><b>6a</b></p>   |  <p><b>18d</b></p>   | <b>DMF/TMSCl,<br/>90 °C, 1 h</b>  | 76 (74) |
|  <p><b>6a</b></p> |  <p><b>18e</b></p> | <b>DMF/TMSCl,<br/>90 °C, 4 h</b>  | 61 (60) |

|                                                                                                  |                                                                                                   |                                   |          |
|--------------------------------------------------------------------------------------------------|---------------------------------------------------------------------------------------------------|-----------------------------------|----------|
| 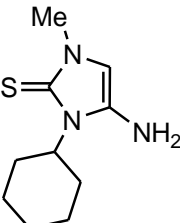<br><b>6b</b>   | <br><b>18f</b>   | <b>DMF/TMSCl,<br/>90 °C, 4 h</b>  | 59       |
| <br><b>6c</b>   | <br><b>18g</b>   | <b>DMF/TMSCl,<br/>90 °C, 4 h</b>  | 58 (60%) |
| <br><b>6b</b>   | <br><b>18h</b>   | <b>DMF/TMSCl,<br/>100 °C, 4 h</b> | 68       |
| <br><b>7a</b> | <br><b>19a</b> | <b>DMF/TMSCl,<br/>100 °C, 2 h</b> | 89 (87)  |

|                                                                                                      |                                                                                                      |                                   |         |
|------------------------------------------------------------------------------------------------------|------------------------------------------------------------------------------------------------------|-----------------------------------|---------|
| 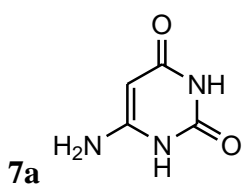 <p><b>7a</b></p>   |  <p><b>19b</b></p>  | <b>DMF/TMSCl,<br/>100 °C, 1 h</b> | 88 (87) |
|  <p><b>7a</b></p>   |  <p><b>19c</b></p> | <b>DMF/TMSCl,<br/>100 °C, 2 h</b> | 85 (85) |
|  <p><b>7b</b></p>   |  <p><b>19d</b></p>  | <b>DMF/TMSCl,<br/>100 °C, 2 h</b> | 90 (88) |
|  <p><b>7b</b></p> |  <p><b>19e</b></p> | <b>DMF/TMSCl,<br/>90 °C, 2 h</b>  | 65 (66) |

|                                                                                                  |                                                                                                   |                                   |         |
|--------------------------------------------------------------------------------------------------|---------------------------------------------------------------------------------------------------|-----------------------------------|---------|
| 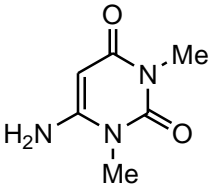<br><b>7c</b>   | <br><b>19f</b>  | <b>DMF/TMSCl,<br/>100 °C, 1 h</b> | 65 (60) |
| <br><b>7c</b>   | <br><b>19g</b>   | <b>DMF/TMSCl,<br/>90 °C, 1 h</b>  | 97 (90) |
| <br><b>7d</b>   | <br><b>19h</b>  | <b>DMF/TMSCl,<br/>100 °C, 2 h</b> | 89      |
| <br><b>7d</b> | <br><b>19i</b> | <b>DMF/TMSCl,<br/>100 °C, 2 h</b> | 68      |

|                                                                                                      |                                                                                                        |                                          |                |
|------------------------------------------------------------------------------------------------------|--------------------------------------------------------------------------------------------------------|------------------------------------------|----------------|
| <p><b>7d</b></p> 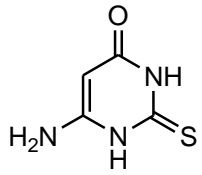   | <p><b>19j</b></p>     | <p><b>DMF/TMSCl,<br/>90 °C, 1 h</b></p>  | <p>79</p>      |
| <p><b>9</b></p>     | <p><b>20a</b></p>    | <p><b>DMF/TMSCl,<br/>100 °C, 3 h</b></p> | <p>60</p>      |
| <p><b>9</b></p>     | <p><b>20b</b></p>    | <p><b>DMF/TMSCl,<br/>100 °C, 2 h</b></p> | <p>70</p>      |
| <p><b>8a</b></p>  | <p><b>21a</b></p>   | <p><b>AcOH, reflux, 3 h</b></p>          | <p>62 (60)</p> |
| <p><b>8a</b></p>  | <p><b>21b</b></p>  | <p><b>AcOH, reflux, 3 h</b></p>          | <p>55 (50)</p> |

|                                                                                                     |                                                                                                      |                                         |                |
|-----------------------------------------------------------------------------------------------------|------------------------------------------------------------------------------------------------------|-----------------------------------------|----------------|
| 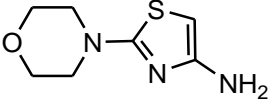 <p><b>8b</b></p>  |  <p><b>21c</b></p> | <p><b>AcOH, reflux, 2 h</b></p>         | <p>60 (54)</p> |
|  <p><b>8c</b></p>  |  <p><b>21d</b></p>  | <p><b>AcOH, reflux, 3 h</b></p>         | <p>61 (61)</p> |
|  <p><b>5</b></p>   |  <p><b>22</b></p>   | <p><b>DMF/TMSCl,<br/>90 °C, 1 h</b></p> | <p>84 (82)</p> |
|  <p><b>6a</b></p> |  <p><b>23</b></p>  | <p><b>DMF/TMSCl,<br/>90 °C, 3 h</b></p> | <p>72 (77)</p> |

|                                                                                                |                                                                                                |                                  |    |
|------------------------------------------------------------------------------------------------|------------------------------------------------------------------------------------------------|----------------------------------|----|
| 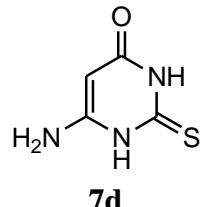<br><b>7d</b> | <br><b>24</b> | <b>DMF/TMSCl,<br/>90 °C, 1 h</b> | 84 |
|------------------------------------------------------------------------------------------------|------------------------------------------------------------------------------------------------|----------------------------------|----|

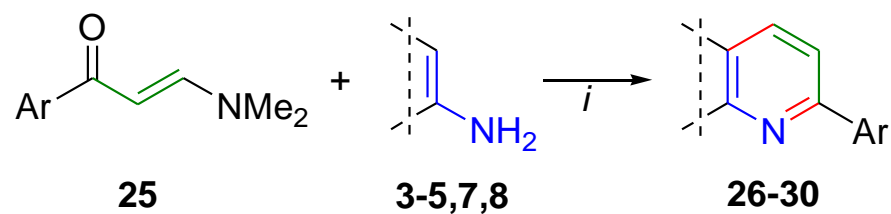

**Scheme 2.** Reagents and conditions: (i) DMF/TMSCl, under argon, 90–120 °C, 1–2 h.

**Table 2.**

| <b>3–5,7,8</b> | <b>26–30</b> | <b>Reaction conditions</b> | <b>Yield (%)</b> |
|----------------|--------------|----------------------------|------------------|
|----------------|--------------|----------------------------|------------------|



|                                                                                                 |                                                                                                    |                                   |    |
|-------------------------------------------------------------------------------------------------|----------------------------------------------------------------------------------------------------|-----------------------------------|----|
| 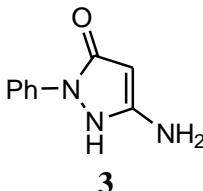<br><b>3</b>   | <br><b>26a</b>   | <b>DMF/TMSCl,<br/>120 °C, 1 h</b> | 70 |
| <br><b>3</b>   | <br><b>26b</b>   | <b>DMF/TMSCl,<br/>120 °C, 1 h</b> | 72 |
| <br><b>3</b>  | <br><b>26c</b>  | <b>DMF/TMSCl,<br/>120 °C, 2 h</b> | 78 |
| <br><b>3</b> | <br><b>26d</b> | <b>DMF/TMSCl,<br/>120 °C, 2 h</b> | 70 |

|                                                                                                     |                                                                                                        |                                   |    |
|-----------------------------------------------------------------------------------------------------|--------------------------------------------------------------------------------------------------------|-----------------------------------|----|
| 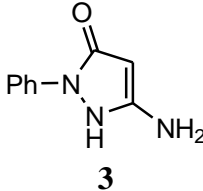 <p><b>3</b></p>   |  <p><b>26e</b></p>   | <b>DMF/TMSCl,<br/>120 °C, 2 h</b> | 82 |
|  <p><b>4</b></p>   |  <p><b>27</b></p>    | <b>DMF/TMSCl,<br/>120 °C, 1 h</b> | 75 |
|  <p><b>5</b></p>  |  <p><b>28a</b></p>  | <b>DMF/TMSCl,<br/>100 °C, 1 h</b> | 77 |
|  <p><b>5</b></p> |  <p><b>28b</b></p> | <b>DMF/TMSCl,<br/>120 °C, 2 h</b> | 78 |

|                                                                                                      |                                                                                                        |                                   |    |
|------------------------------------------------------------------------------------------------------|--------------------------------------------------------------------------------------------------------|-----------------------------------|----|
| 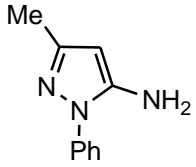 <p><b>5</b></p>    |  <p><b>28c</b></p>   | <b>DMF/TMSCl,<br/>120 °C, 2 h</b> | 65 |
|  <p><b>5</b></p>    |  <p><b>28d</b></p>   | <b>DMF/TMSCl,<br/>120 °C, 2 h</b> | 78 |
|  <p><b>8a</b></p>   |  <p><b>29a</b></p>   | <b>AcOH, reflux, 2 h</b>          | 63 |
|  <p><b>8a</b></p> |  <p><b>29b</b></p> | <b>AcOH, reflux, 2 h</b>          | 58 |

|                                                                                                      |                                                                                                        |                                          |    |
|------------------------------------------------------------------------------------------------------|--------------------------------------------------------------------------------------------------------|------------------------------------------|----|
| 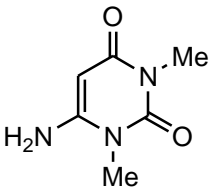 <p><b>7c</b></p>   |  <p><b>30a</b></p>   | <p><b>DMF/TMSCl,<br/>120 °C, 2 h</b></p> | 82 |
|  <p><b>7d</b></p>   |  <p><b>30b</b></p>   | <p><b>DMF/TMSCl,<br/>120 °C, 2 h</b></p> | 85 |
|  <p><b>7b</b></p>   |  <p><b>30c</b></p>   | <p><b>DMF/TMSCl,<br/>120 °C, 2 h</b></p> | 80 |
|  <p><b>7c</b></p> |  <p><b>30d</b></p> | <p><b>DMF/TMSCl,<br/>120 °C, 2 h</b></p> | 77 |

## (B) Spectral data

### 1,2-Dihydro-6-(2-hydroxy-5-methylphenyl)-2-phenylpyrazolo[3,4-*b*]pyridin-3-one (15a)

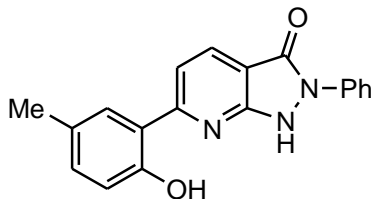

Brown solid, mp 238–240 °C (*i*-PrOH).

<sup>1</sup>H NMR (300 MHz, DMSO-*d*<sub>6</sub>): δ = 2.30 (s, 3H, Me), 6.94 (d, 1H, <sup>3</sup>*J* = 8.3 Hz), 7.18 (dd, 1H, <sup>3</sup>*J* = 8.3 Hz, <sup>4</sup>*J* = 1.7 Hz), 7.25–7.30 (m, 1H), 7.49–7.55 (m, 2H), 7.85–7.97 (m, 4H), 8.32 (d, 1H, <sup>3</sup>*J* = 8.3 Hz), 9.02 (br s, 1H, OH), 11.04 (br s, 1H, NH).

<sup>13</sup>C NMR (62.9 MHz, DMSO-*d*<sub>6</sub>): δ = 34.0, 108.5, 114.7, 117.7, 119.3, 119.7, 125.2, 127.9, 128.7, 129.1, 132.9, 134.4, 137.2, 154.9, 156.2, 158.1, 160.0.

MS (EI, 70 eV): *m/z* (%) = 317 (M<sup>+</sup>, 100), 288 (19), 77 (14).

HRMS (EI): calcd for C<sub>19</sub>H<sub>15</sub>N<sub>3</sub>O<sub>2</sub> (M<sup>+</sup>) 317.11588, found 317.115490.

IR (ATR, cm<sup>-1</sup>):  $\tilde{\nu}$  = 2967 (w), 2766 (w), 2456 (w), 1665 (w), 1593 (m), 1486 (m), 1447 (m), 1392 (w), 1295 (m), 1231 (m), 1124 (m), 1076 (w), 1026 (w), 884 (w), 809 (m), 746 (s), 684 (s), 603 (m).

### 1,2-Dihydro-6-(2-hydroxyphenyl)-2-phenylpyrazolo[3,4-*b*]pyridin-3-one (15b)

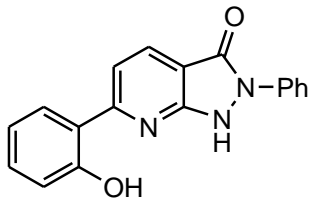

Orange solid, mp 180–182 °C (heptane:*i*-PrOH/1:5).

<sup>1</sup>H NMR (300 MHz, DMSO-*d*<sub>6</sub>): δ = 6.95–7.02 (m, 2H), 7.25–7.30 (m, 1H), 7.35–7.41 (m, 1H), 7.50–7.55 (m, 2H), 7.93 (d, 3H, <sup>3</sup>*J* = 7.6 Hz), 8.05 (d, 1H, <sup>3</sup>*J* = 7.7 Hz), 8.33 (d, 1H, <sup>3</sup>*J* = 8.3 Hz), 11.80 (br s, 1H, OH), 12.67 (br s, 1H, NH).

$^{13}\text{C}$  NMR (62.9 MHz,  $\text{DMSO-}d_6$ ):  $\delta = 108.6, 114.8, 117.8, 119.3, 119.4, 120.0, 125.2, 128.7, 129.1, 132.3, 134.8, 137.1, 155.0, 158.0, 158.4, 160.0$ .

MS (EI, 70 eV):  $m/z$  (%) = 302 ( $\text{M}^+$ , 100), 274 (22), 77 (43).

HRMS (ESI): calcd for  $\text{C}_{18}\text{H}_{14}\text{N}_3\text{O}_2$  ( $\text{M}+\text{H}$ ) 303.10023, found 303.100464.

IR (ATR,  $\text{cm}^{-1}$ ):  $\tilde{\nu} = 3024$  (w), 1661 (m), 1600 (m), 1484 (m), 1445 (m), 1414 (m), 1295 (w), 1273 (m), 1239 (m), 1187 (w), 1154 (w), 1033 (w), 935 (w), 903 (w), 815 (m), 752 (s), 689 (m), 603 (m).

### 6-(5-Chloro-2-hydroxyphenyl)-1,2-dihydro-2-phenylpyrazolo[3,4-*b*]pyridin-3-one (15c)

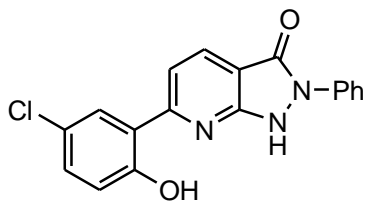

Brown solid, mp 301–303 °C (heptane: *i*-PrOH/1:15).

$^1\text{H}$  NMR (250 MHz,  $\text{DMSO-}d_6$ ):  $\delta = 7.07$  (d, 1H,  $^3J = 8.7$  Hz), 7.27 (t, 1H,  $^3J = 7.5$  Hz), 7.39 (dd, 1H,  $^3J = 8.7$  Hz,  $^3J = 2.7$  Hz), 7.49–7.55 (m, 2H), 7.92–8.06 (m, 4H), 8.31 (d, 1H,  $^3J = 8.3$  Hz), 11.92 (br s, 1H, OH), 12.39 (br s, 1H, NH).

$^{13}\text{C}$  NMR (62.9 MHz,  $\text{DMSO-}d_6$ ):  $\delta = 109.0, 115.9, 119.4, 119.5, 122.5, 123.0, 125.3, 128.3, 129.1, 131.4, 134.7, 155.3, 155.4, 156.8, 158.0, 178.9$ .

MS (EI, 70 eV):  $m/z$  (%) = 337 ( $\text{M}^+$ , 100), 308 (13).

HRMS (ESI): calcd for  $\text{C}_{18}\text{H}_{13}\text{ClN}_3\text{O}_2$  ( $\text{M}+\text{H}$ ) 338.79255, found 338.79257.

IR (ATR,  $\text{cm}^{-1}$ ):  $\tilde{\nu} = 3391$  (w), 2991 (w), 2771 (w), 2450 (w), 1661 (m), 1591 (m), 1486 (m), 1447 (m), 1389 (m), 1336 (w), 1292 (m), 1276 (m), 1245 (m), 1207 (w), 1175 (m), 1158 (w), 1126 (w), 1099 (w), 1075 (w), 1023 (w), 944 (w), 868 (w), 828 (m), 810 (m), 757 (s), 719 (s), 686 (m), 598 (m), 577 (m), 539 (m).

### 1-Cyclohexyl-6-(2-hydroxy-5-methylphenyl)-1*H*-pyrrolo[2,3-*b*]pyridine-3-carbonitrile (16a)

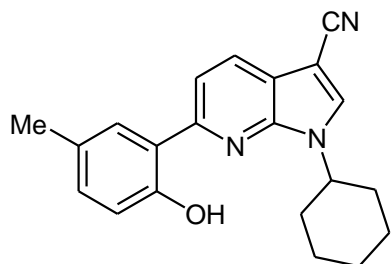

Yellow solid, mp 168–170 °C (heptane: *i*-PrOH/1:10).

$^1\text{H}$  NMR (300 MHz, DMSO- $d_6$ ):  $\delta$  = 1.24–1.54 (m, 4H, CH<sub>2</sub>), 1.72–2.08 (m, 6H, CH<sub>2</sub>), 2.30 (s, 3H, Me), 4.53–4.61 (m, 1H, NCH), 6.86 (d, 1H,  $^3J$  = 8.4 Hz), 7.11 (d, 1H,  $^3J$  = 7.9 Hz), 7.81 (s, 1H), 8.05 (d, 1H,  $^3J$  = 8.4 Hz), 8.25 (d, 1H,  $^3J$  = 8.7 Hz), 8.61 (s, 1H), 12.37 (s, 1H, OH).

$^{13}\text{C}$  NMR (62.9 MHz, DMSO- $d_6$ ):  $\delta$  = 20.2, 24.8, 25.2, 32.1, 55.0, 83.1, 115.2, 115.6, 117.4, 118.2, 120.3, 127.8, 128.2, 129.5, 131.6, 135.6, 143.2, 152.1, 155.4.

MS (GC, 70 eV):  $m/z$  (%) = 331 ( $\text{M}^+$ , 77), 246 (100), 220 (13).

HRMS (ESI): calcd for C<sub>21</sub>H<sub>21</sub>N<sub>3</sub>O ( $\text{M}^+$ ) 331.16791, found 331.167627.

IR (ATR, cm<sup>-1</sup>):  $\tilde{\nu}$  = 3114 (w), 2922 (m), 2857 (m), 2219 (s), 1604 (w), 1579 (m), 1521 (m), 1490 (m), 1443 (s), 1403 (m), 1361 (m), 1282 (s), 1245 (m), 1222 (s), 1209 (s), 1184 (s), 1152 (m), 1028 (m), 955 (w), 894 (w), 862 (w), 819 (s), 791 (s), 764 (m), 732 (m), 673 (m), 648 (s), 615 (m), 553 (m).

### 6-(5-Chloro-2-hydroxyphenyl)-1-cyclohexyl-1H-pyrrolo[2,3-*b*]pyridine-3-carbonitrile (16b)

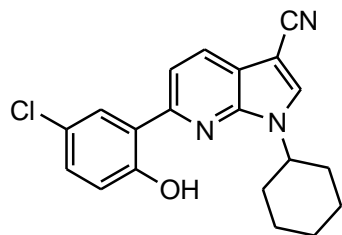

Yellow solid, mp 202–210 °C (heptane: *i*-PrOH/1:10).

$^1\text{H}$  NMR (300 MHz, DMSO- $d_6$ ):  $\delta$  = 1.23–1.86 (m, 6H, CH<sub>2</sub>), 1.97–2.02 (m, 2H, CH<sub>2</sub>), 2.16–2.23 (m, 2H, CH<sub>2</sub>), 4.52–4.63 (m, 1H, NCH), 6.98 (d, 1H,  $^3J$  = 8.9 Hz), 7.25 (dd, 1H,  $^3J$  = 8.5 Hz,  $^3J$  = 2.5 Hz), 7.79–7.83 (m, 3H), 8.19 (d, 1H,  $^3J$  = 8.5 Hz), 13.34 (s, 1H, OH).

$^{13}\text{C}$  NMR (62.9 MHz,  $\text{CDCl}_3$ ):  $\delta$  = 25.2, 25.5, 33.1, 55.6, 85.3, 114.3, 114.6, 119.3, 120.6, 124.2, 126.5, 130.3, 131.1, 132.8, 143.8, 143.0, 152.0, 157.4.

MS (GC, 70 eV):  $m/z$  (%) = 351 ( $\text{M}^+$ , 100).

HRMS (EI): calcd for  $\text{C}_{20}\text{H}_{18}\text{ClN}_3\text{O}$  ( $\text{M}^+$ ) 351.11329, found 351.113058.

IR (ATR,  $\text{cm}^{-1}$ ):  $\tilde{\nu}$  = 3113 (w), 922 (w), 2219 (w), 1639 (w), 1580 (w), 1539 (w), 1522 (w), 1474 (m), 1446 (m), 1399 (m), 1357 (w), 1278 (m), 1242 (m), 1215 (m), 1185 (m), 1027 (w), 891 (w), 862 (w), 817 (s), 795 (m), 727 (m), 680 (m), 648 (s), 615 (m).

#### 4-Methyl-2-(3-methyl-1-phenyl-1H-pyrazolo[3,4-b]pyridin-6-yl)phenol (17a)

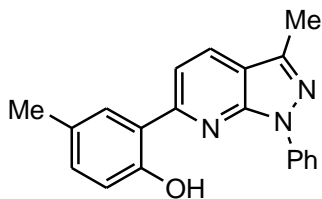

Yellow solid, mp 139–140 °C (heptane: *i*-PrOH/1:1).

$^1\text{H}$  NMR (300 MHz,  $\text{DMSO}-d_6$ ):  $\delta$  = 2.30 (s, 3H, Me), 2.60 (s, 3H, Me), 6.88 (d, 1H,  $^3J$  = 8.8 Hz), 7.14 (dd, 1H,  $^3J$  = 8.3 Hz,  $^3J$  = 1.9 Hz), 7.38 (t, 1H,  $^3J$  = 7.8 Hz), 7.59 (t, 2H,  $^3J$  = 7.8 Hz), 7.86 (s, 1H), 7.97–8.04 (m, 3H), 8.42 (d, 1H,  $^3J$  = 8.8 Hz), 12.43 (s, 1H, OH).

$^{13}\text{C}$  NMR (62.9 MHz,  $\text{DMSO}-d_6$ ):  $\delta$  = 12.1, 20.2, 114.8, 115.1, 117.5, 120.2, 121.2, 126.2, 127.8, 128.7, 129.4, 131.8, 132.3, 138.5, 143.2, 147.7, 155.9, 156.3.

MS (GC, 70 eV):  $m/z$  (%) = 315 ( $\text{M}^+$ , 100), 286 (20).

HRMS (EI): calcd for  $\text{C}_{20}\text{H}_{17}\text{N}_3\text{O}$  ( $\text{M}^+$ ) 315.13661, found 315.136368.

IR (ATR,  $\text{cm}^{-1}$ ):  $\tilde{\nu}$  = 3380 (m), 2984 (m), 2770 (m), 2447 (w), 1580 (m), 1468 (s), 1439 (m), 1403 (m), 1307 (w), 1284 (m), 1245 (m), 1193 (m), 1163 (m), 1130 (m), 1081 (m), 1022 (m), 961 (w), 888 (w), 813 (s), 765 (m), 748 (s), 729 (s), 686 (s), 666 (s), 636 (s).

#### 4-Bromo-2-(3-methyl-1-phenyl-1H-pyrazolo[3,4-b]pyridin-6-yl)phenol (17b)

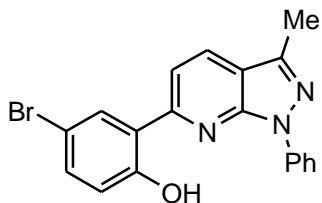



Yellow solid, mp 180–181 °C (MeOH: H<sub>2</sub>O/3:1).

<sup>1</sup>H NMR (300 MHz, DMSO-*d*<sub>6</sub>): δ = 2.62 (s, 3H, Me), 6.94 (d, 1H, <sup>3</sup>*J* = 8.8 Hz), 7.38 (t, 1H, <sup>3</sup>*J* = 7.7 Hz), 7.47 (dd, 1H, <sup>3</sup>*J* = 8.8 Hz, <sup>4</sup>*J* = 2.2 Hz), 7.86 (t, 2H, <sup>3</sup>*J* = 7.7 Hz), 8.00–8.09 (m, 3H), 8.18 (s, 1H), 8.44 (d, 1H, <sup>3</sup>*J* = 8.8 Hz), 12.44 (s, 1H, OH).

<sup>13</sup>C NMR (62.9 MHz, DMSO-*d*<sub>6</sub>): δ = 12.1, 110.5, 115.5, 115.6, 119.7, 121.1, 123.4, 126.2, 129.3, 131.1, 131.9, 133.8, 138.5, 143.2, 147.9, 154.5, 156.9.

MS (GC, 70 eV): *m/z* (%) = 379 (M<sup>+</sup>, 100).

HRMS (ESI): calcd for C<sub>19</sub>H<sub>15</sub>BrN<sub>3</sub>O (M+1) 380.0393, found 380.03927.

IR (ATR, cm<sup>-1</sup>):  $\tilde{\nu}$  = 3061 (m), 1593 (s), 1578 (m), 1510 (m), 1474 (m), 1430 (m), 1398 (m), 1362 (m), 1286 (s), 1240 (m), 1206 (s), 1192 (m), 1171 (m), 1092 (m), 1013 (w), 954 (w), 852 (w), 814 (s), 779 (m), 747 (s), 701 (m), 687 (s), 665 (s), 633 (s), 596 (m).

#### 4-Chloro-2-(3-methyl-1-phenyl-1*H*-pyrazolo[3,4-*b*]pyridin-6-yl)phenol (17c)

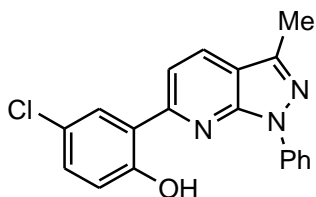

Yellow solid, mp 186–188 °C (MeOH: H<sub>2</sub>O/2:1).

<sup>1</sup>H NMR (300 MHz, DMSO-*d*<sub>6</sub>): δ = 3.31 (s, 3H, Me), 6.93–7.60 (m, 5H), 8.08 (s, 4H), 8.33–8.64 (m, 1H), 12.42 (s, 1H, OH).

<sup>13</sup>C NMR (62.9 MHz, DMSO-*d*<sub>6</sub>): δ = 12.1, 112.2, 115.6, 119.3, 121.1, 123.0, 123.9, 126.2, 128.3, 129.4, 131.0, 132.0, 134.1, 138.5, 143.2, 156.5, 157.3.

MS (GC, 70 eV): *m/z* (%) = 335 (M<sup>+</sup>, 100).

HRMS (EI): calcd for C<sub>19</sub>H<sub>14</sub>ClN<sub>3</sub>O (M<sup>+</sup>) 335.08199, found 335.081761.

IR (ATR, cm<sup>-1</sup>):  $\tilde{\nu}$  = 3063 (m), 1641 (w), 1596 (m), 1579 (m), 1513 (m), 1480 (m), 1466 (m), 1434 (m), 1398 (m), 1364 (m), 1331 (w), 1286 (s), 1241 (m), 1207 (m), 1194 (m), 1133 (w), 1104 (m), 1081 (m), 1024 (w), 901 (w), 834 (w), 812 (s), 779 (m), 746 (s), 713 (m), 687 (s), 653 (m), 633 (m).

#### 5-(2-Hydroxy-5-methylphenyl)-1-methyl-3-phenyl-1*H*-imidazo[4,5-*b*]pyridine-2(3*H*)-thione (18a)

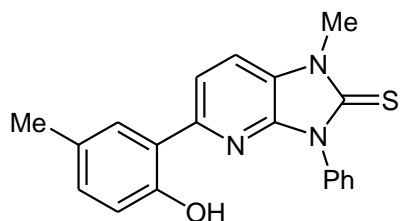

Green solid, mp 224–225 °C (heptane: *i*-PrOH/1:3).

$^1\text{H}$  NMR (300 MHz, DMSO- $d_6$ ):  $\delta$  = 2.25 (s, 3H, Me), 3.80 (s, 3H, NMe), 6.70 (d, 1H,  $^3J$  = 8.2 Hz), 7.01 (dd, 1H,  $^3J$  = 8.2 Hz,  $^4J$  = 1.5 Hz), 7.48–7.66 (m, 5H, Ph), 7.70 (s, 1H), 7.99–8.05 (m, 2H), 11.76 (s, 1H, OH).

$^{13}\text{C}$  NMR (69.2 MHz, DMSO- $d_6$ ):  $\delta$  = 20.2, 31.2, 115.6, 117.4, 118.7, 119.4, 124.8, 127.3, 127.6, 128.1, 129.0, 129.2, 131.2, 134.2, 142.7, 150.0, 154.9, 170.6.

MS (GC, 70 eV):  $m/z$  (%) = 347 ( $\text{M}^+$ , 100), 332 (15).

HRMS (ESI): calcd for  $\text{C}_{20}\text{H}_{18}\text{N}_3\text{OS}$  ( $\text{M}+\text{H}$ ) 348.2558, found 348.2559.

IR (ATR,  $\text{cm}^{-1}$ ):  $\tilde{\nu}$  = 2912 (w), 1496 (w), 1464 (m), 1434 (m), 1381 (m), 1329 (m), 1282 (s), 1249 (s), 1215 (m), 1183 (m), 1135 (m), 1189 (m), 1024 (w), 911 (w), 815 (s), 793 (s), 773 (m), 758 (s), 733 (m), 686 (s), 648 (m).

### 5-(2-Hydroxyphenyl)-1-methyl-3-phenyl-1H-imidazo[4,5-b]pyridine-2(3H)-thione (18b)

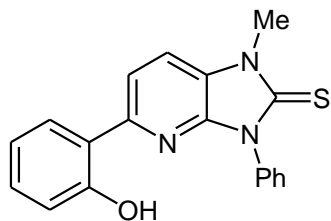

White solid, mp 220–222 °C (heptane: *i*-PrOH/1:3).

$^1\text{H}$  NMR (300 MHz, DMSO- $d_6$ ):  $\delta$  = 3.82 (s, 3H, Me), 6.81–6.91 (m, 2H), 7.19–7.25 (m, 1H), 7.54–7.67 (m, 5H, Ph), 7.91 (dd, 1H,  $^3J$  = 8.1 Hz,  $^4J$  = 1.4 Hz), 8.03–8.10 (m, 2H), 11.90 (s, 1H, OH).

$^{13}\text{C}$  NMR (75.5 MHz, DMSO- $d_6$ ):  $\delta$  = 31.2, 116.0, 117.5, 118.7, 119.2, 120.2, 125.0, 127.5, 128.2, 129.0, 129.3, 130.5, 134.2, 142.9, 149.9, 157.0, 170.7.

MS (GC, 70 eV):  $m/z$  (%) = 333 ( $\text{M}^+$ , 100), 318 (19).

HRMS (EI): calcd for  $\text{C}_{19}\text{H}_{15}\text{N}_3\text{OS}$  ( $\text{M}^+$ ) 333.08521, found 333.092105.

IR (ATR,  $\text{cm}^{-1}$ ):  $\tilde{\nu}$  = 3051 (w), 1615 (w), 1593 (w), 1499 (w), 1466 (m), 1427 (m), 1332 (s), 1296 (m), 1281 (m), 1248 (m), 1227 (m), 1203 (m), 1164 (m), 1041 (m), 1090 (m), 1022 (w), 963 (w), 932 (w), 812 (s), 753 (s), 734 (m), 706 (s), 689 (s), 636 (s).

### 3-Cyclohexyl-5-(2-hydroxyphenyl)-1-methyl-1H-imidazo[4,5-b]pyridine-2(3H)-thione (18c)

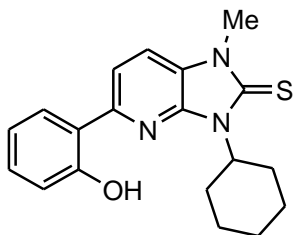

Yellow solid, mp 250–251 °C (*i*-PrOH).

$^1\text{H}$  NMR (300 MHz,  $\text{DMSO-}d_6$ ):  $\delta$  = 1.16–1.49 (m, 3H,  $\text{CH}_2$ ), 1.75–1.93 (m, 5H,  $\text{CH}_2$ ), 2.35–2.43 (m, 2H,  $\text{CH}_2$ ), 3.75 (s, 3H, Me), 5.07–5.15 (m, 1H, NCH), 6.93–7.00 (m, 2H), 7.26–7.33 (m, 1H), 7.96–8.08 (m, 3H), 12.02 (s, 1H, OH).

$^{13}\text{C}$  NMR (62.9 MHz,  $\text{DMSO-}d_6$ ):  $\delta$  = 25.0, 25.5, 29.0, 31.4, 56.1, 115.9, 117.4, 118.3, 119.5, 121.3, 124.8, 128.1, 130.4, 142.2, 149.0, 156.8, 169.8.

MS (GC, 70 eV):  $m/z$  (%) = 339 ( $\text{M}^+$ , 48), 257 (100).

HRMS (EI): calcd for  $\text{C}_{19}\text{H}_{21}\text{N}_3\text{OS}$  ( $\text{M}^+$ ) 339.13998, found 339.139863.

IR (ATR,  $\text{cm}^{-1}$ ):  $\tilde{\nu}$  = 2918 (w), 2858 (w), 1614 (w), 1504 (w), 1465 (m), 1428 (m), 1382 (m), 1325 (m), 1282 (m), 1238 (m), 1167 (m), 1139 (m), 1044 (m), 894 (w), 808 (s), 738 (s), 685 (m), 657 (m), 620 (m).

### 5-(5-Bromo-2-hydroxyphenyl)-1-methyl-3-phenyl-1H-imidazo[4,5-b]pyridine-2(3H)-thione (18d)

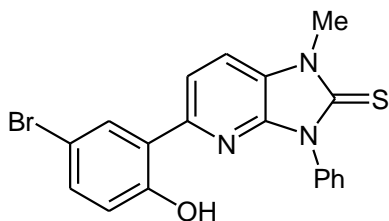

Brown solid, mp 248–250 °C (MeOH:  $\text{H}_2\text{O}$ /15:1).

$^1\text{H}$  NMR (250 MHz, DMSO- $d_6$ ):  $\delta$  = 3.58 (s, 3H, Me), 6.57 (d, 1H,  $^3J$  = 8.9 Hz), 7.11 (dd, 1H,  $^3J$  = 8.7 Hz,  $^4J$  = 2.2 Hz), 7.29–7.42 (m, 5H, Ph), 7.79–7.80 (m, 2H), 7.83 (s, 1H), 11.64 (s, 1H, OH).

$^{13}\text{C}$  NMR (62.9 MHz, DMSO- $d_6$ ):  $\delta$  = 31.2, 110.5, 116.9, 118.5, 119.7, 123.0, 125.5, 128.2, 129.0, 129.2, 129.9, 132.8, 134.2, 141.2, 143.2, 148.1, 156.0, 171.0.

MS (GC, 70 eV):  $m/z$  (%) = 412 ( $\text{M}^+$ , 100), 166 (12).

HRMS (ESI): calcd for  $\text{C}_{19}\text{H}_{15}\text{ClN}_3\text{OS}$  ( $\text{M}+\text{H}$ ) 413.11258, found 413.11261

IR (ATR,  $\text{cm}^{-1}$ ):  $\tilde{\nu}$  = 2913 (w), 1499 (w), 1463 (m), 1431 (w), 1384 (m), 1329 (m), 1280 (s), 1247 (m), 1200 (m), 1148 (m), 1090 (w), 969 (w), 934 (w), 864 (w), 819 (s), 714 (w), 687 (s), 640 (m), 582 (w).

### 5-(5-Chloro-2-hydroxyphenyl)-1-methyl-3-phenyl-1*H*-imidazo[4,5-*b*]pyridine-2(3*H*)-thione (18e)

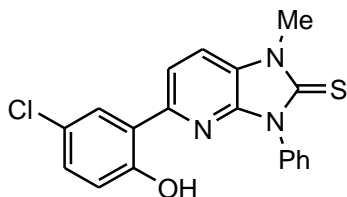

Yellow solid, mp 252–254 °C (*i*-PrOH).

$^1\text{H}$  NMR (300 MHz, DMSO- $d_6$ ):  $\delta$  = 3.83 (s, 3H, Me), 6.87 (d, 1H,  $^3J$  = 8.7 Hz), 7.23 (s, 1H), 7.62 (s, 5H, Ph), 7.92 (s, 1H), 8.05–8.18 (m, 2H), 11.90 (br s, 1H, OH).

$^{13}\text{C}$  NMR due to bed solubility was not possible to measure.

MS (GC, 70 eV):  $m/z$  (%) = 367 ( $\text{M}^+$ , 100), 352 (11).

HRMS (ESI): calcd for  $\text{C}_{19}\text{H}_{15}\text{ClN}_3\text{OS}$  ( $\text{M}+\text{H}$ ) 368.06189, found 368.06207.

IR (ATR,  $\text{cm}^{-1}$ ):  $\tilde{\nu}$  = 2915 (w), 1618 (w), 1498 (m), 1462 (s), 1434 (m), 1383 (m), 1330 (s), 1297 (s), 1279 (s), 1247 (m), 1189 (m), 1150 (m), 1086 (m), 1026 (w), 971 (w), 935 (w), 904 (w), 865 (w), 819 (s), 754 (m), 722 (m), 687 (s), 658 (m), 584 (m).

### 5-(5-Chloro-2-hydroxyphenyl)-3-cyclohexyl-1-methyl-1*H*-imidazo[4,5-*b*]pyridine-2(3*H*)-thione (18f)

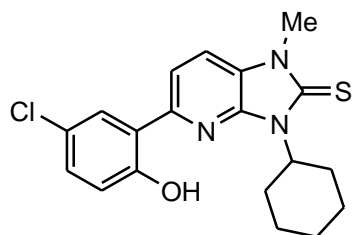

Yellow solid, mp 185–187 °C (heptane: *i*-PrOH/1:10).

$^1\text{H}$  NMR (300 MHz, DMSO- $d_6$ ):  $\delta$  = 1.16–1.48 (m, 3H, CH<sub>2</sub>), 1.61–1.99 (m, 5H, CH<sub>2</sub>), 2.36–2.44 (m, 2H, CH<sub>2</sub>), 3.75 (s, 3H, Me), 5.05–5.13 (m, 1H, NCH), 7.02 (d, 1H,  $^3J$  = 8.5 Hz, CH<sub>Ar</sub>), 7.30 (dd, 1H,  $^3J$  = 8.8 Hz,  $^4J$  = 2.5 Hz, CH<sub>Ar</sub>), 7.95–8.02 (m, 2H, CH<sub>Ar</sub>), 8.14 (d, 1H,  $^3J$  = 8.8 Hz, CH<sub>Ar</sub>), 11.91 (s, 1H, OH).

$^{13}\text{C}$  NMR (75.5 MHz, DMSO- $d_6$ ):  $\delta$  = 25.0, 25.5, 29.0, 31.4, 56.2, 116.7, 118.0, 119.1, 123.1, 123.4, 125.2, 127.6, 129.7, 142.5, 147.2, 155.4, 170.0.

MS (GC, 70 eV):  $m/z$  (%) = 373 (M<sup>+</sup>, 42), 291 (100).

HRMS (ESI): calcd for C<sub>19</sub>H<sub>21</sub>ClN<sub>3</sub>OS (M+H) 374.10884, found 374.10876.

IR (ATR, cm<sup>-1</sup>):  $\tilde{\nu}$  = 2934 (w), 2854 (w), 1615 (w), 1468 (m), 1434 (m), 1383 (m), 1338 (m), 1323 (m), 1295 (m), 1279 (s), 1244 (m), 1213 (w), 1170 (m), 1141 (m), 1092 (w), 1047 (w), 933 (w), 864 (w), 825 (m), 806 (s), 718 (m), 655 (m), 625 (w), 582 (m).

### 5-(5-Chloro-2-hydroxyphenyl)-3-ethyl-1-methyl-1H-imidazo[4,5-*b*]pyridine-2(3H)-thione (18g)

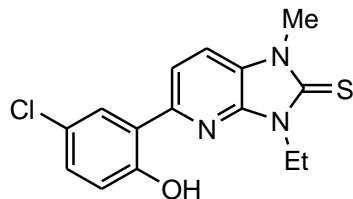

Green solid, mp 204–206 °C (*i*-PrOH).

$^1\text{H}$  NMR (300 MHz, DMSO- $d_6$ ):  $\delta$  = 1.33 (t, 3H,  $^3J$  = 7.1 Hz, CH<sub>2</sub>Me), 3.73 (s, 3H, Me), 4.34 (q, 2H, CH<sub>2</sub>), 6.96 (d, 1H,  $^3J$  = 8.5 Hz), 7.26 (dd, 1H,  $^3J$  = 8.7 Hz,  $^4J$  = 2.7 Hz), 7.89–7.93 (m, 2H), 8.05 (d, 1H,  $^3J$  = 8.5 Hz), 11.64 (br s, 1H, OH).

$^{13}\text{C}$  NMR (62.9 MHz, DMSO- $d_6$ ):  $\delta$  = 12.7, 30.9, 38.1, 117.2, 117.7, 118.9, 123.0, 123.7, 125.0, 127.7, 129.8, 142.5, 147.8, 155.2, 169.9.

MS (GC, 70 eV):  $m/z$  (%) = 319 (M<sup>+</sup>, 100), 291 (50).

HRMS (ESI): calcd for C<sub>15</sub>H<sub>15</sub>ClN<sub>3</sub>OS (M+H) 320.06189, found 320.06194.

IR (ATR,  $\text{cm}^{-1}$ ):  $\tilde{\nu}$  = 2938 (w), 1469 (m), 1436, 1383 (s), 1341 (m), 1316 (m), 1278 (s), 1244 (m), 1187 (m), 1148 (w), 1122 (s), 1089 (m), 1028 (w), 957 (w), 867 (w), 858 (w), 846 (w), 829 (m), 802 (s), 774 (w), 753 (w), 718 (m), 673 (w), 652 (m), 595 (m), 570 (w), 548 (w).

### 3-Cyclohexyl-5-(2,5-dihydroxyphenyl)-1-methyl-1*H*-imidazo[4,5-*b*]pyridine-2(3*H*)-thione (18h)

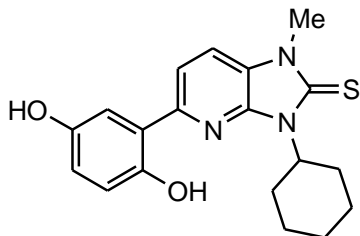

Yellow solid, mp 307–309 °C (*i*-PrOH).

$^1\text{H}$  NMR (300 MHz,  $\text{DMSO-}d_6$ ):  $\delta$  = 1.21–1.53 (m, 3H,  $\text{CH}_2$ ), 1.62–2.11 (m, 5H,  $\text{CH}_2$ ), 2.29–2.40 (m, 2H,  $\text{CH}_2$ ), 3.73 (s, 3H, Me), 5.06–5.14 (m, 1H, NCH), 6.36–6.41 (m, 2H), 7.82 (d, 1H,  $^3J = 8.7$  Hz), 7.88–7.95 (m, 2H), 9.77 (s, 1H, OH), 12.44 (s, 1H, OH).

$^{13}\text{C}$  NMR (75.5 MHz,  $\text{DMSO-}d_6$ ):  $\delta$  = 25.6, 29.0, 31.4, 56.0, 62.0, 103.4, 107.8, 112.2, 114.2, 118.7, 123.9, 128.8, 141.6, 150.0, 158.7, 160.0, 169.2.

MS (GC, 70 eV):  $m/z$  (%) = 355 ( $\text{M}^+$ , 74), 273 (100), 168 (10).

HRMS (ESI): calcd for  $\text{C}_{19}\text{H}_{21}\text{N}_3\text{O}_2\text{S}$  ( $\text{M}^+$ ) 355.13490, found 355.134366.

IR (ATR,  $\text{cm}^{-1}$ ):  $\tilde{\nu}$  = 3305 (w), 3139 (w), 2929 (m), 2862 (w), 1610 (m), 1465 (s), 1437 (s), 1385 (m), 1323 (s), 1298 (s), 1250 (s), 1221 (m), 1169 (s), 1140 (s), 1122 (m), 1046 (m), 976 (m), 946 (m), 840 (w), 791 (s), 721 (m), 652 (m), 611 (m).

### 7-(2-Hydroxy-5-methylphenyl)pyrido[2,3-*d*]pyrimidine-2,4-diol (19a)

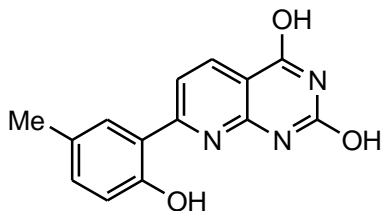

Green solid, mp more than 375 °C (EE: *i*-PrOH/1:2).

$^1\text{H}$  NMR (300 MHz,  $\text{DMSO-}d_6$ ):  $\delta$  = 2.28 (s, 3H, Me), 6.86 (d, 1H,  $^3J = 8.2$  Hz), 7.17 (dd, 1H,  $^3J = 8.4$  Hz,  $^4J = 1.7$  Hz), 7.83 (s, 1H), 7.93 (d, 1H,  $^3J = 8.4$  Hz), 8.30 (d, 1H,  $^3J = 8.4$  Hz), 8.93, 11.45, 12.00 (all s, 1H, OH).

$^{13}\text{C}$  NMR (62.9 MHz,  $\text{DMSO-}d_6$ ):  $\delta$  = 20.1, 107.7, 114.8, 118.1, 118.2, 127.8, 128.2, 133.5, 137.4, 150.4, 150.7, 156.8, 160.9, 161.8.

MS (GC, 70 eV):  $m/z$  (%) = 269 ( $\text{M}^+$ , 100), 198 (16).

HRMS (EI): calcd for  $\text{C}_{14}\text{H}_{11}\text{N}_3\text{O}_3$  ( $\text{M}^+$ ) 269.07949, found 269.079464.

IR (ATR,  $\text{cm}^{-1}$ ):  $\tilde{\nu}$  = 3426 (w), 2981 (w), 2764 (m), 2457 (w), 1709 (m), 1661 (s), 1591 (s), 1472 (m), 1409 (s), 1365 (m), 1266 (m), 1241 (m), 1203 (m), 1115 (w), 1054 (w), 1025 (m), 950 (w), 878 (w), 800 (s), 767 (s), 706 (m), 678 (m), 651 (m), 588 (m).

### 7-(2-Hydroxyphenyl)pyrido[2,3-*d*]pyrimidine-2,4(1*H*,3*H*)-dione (19b)

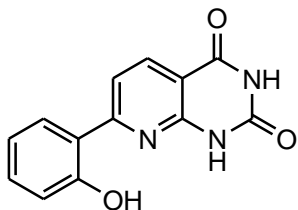

White solid, mp > 375 °C (EE: *i*-PrOH/1:3).

$^1\text{H}$  NMR (300 MHz,  $\text{DMSO-}d_6$ ):  $\delta$  = 6.92–7.00 (m, 2H), 7.35–7.41 (m, 1H), 7.96 (d, 1H,  $^3J$  = 8.4 Hz), 8.04 (dd, 1H,  $^3J$  = 8.0 Hz,  $^4J$  = 1.4 Hz), 8.33 (d, 1H,  $^3J$  = 8.4 Hz), 11.51 (s, 1H, OH), 12.03 (s, 1H, NH), 12.52 (s, 1H, NH).

$^{13}\text{C}$  NMR (62.9 MHz,  $\text{DMSO-}d_6$ ):  $\delta$  = 107.9, 114.9, 118.2, 118.7, 119.2, 128.4, 132.7, 137.5, 150.4, 150.7, 158.9, 160.8, 161.8.

MS (GC, 70 eV):  $m/z$  (%) = 255 ( $\text{M}^+$ , 12), 184 (20).

HRMS (ESI): calcd for  $\text{C}_{13}\text{H}_{10}\text{N}_3\text{O}_3$  ( $\text{M}+1$ ) 256.07167, found 256.07177.

IR (ATR,  $\text{cm}^{-1}$ ):  $\tilde{\nu}$  = 3152 (w), 2984 (w), 2765 (m), 1710 (m), 1667 (m), 1592 (m), 1475 (m), 1414 (m), 1384 (m), 1277 (m), 1220 (m), 1151 (m), 1007 (w), 942 (w), 859 (m), 803 (m), 749 (s), 680 (m), 643 (m).

### 7-(5-Chloro-2-hydroxyphenyl)pyrido[2,3-*d*]pyrimidine-2,4(1*H*,3*H*)-dione (19c)

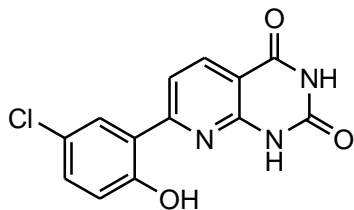

Orange solid, mp > 375 °C (EE: *i*-PrOH/1:3).

$^1\text{H}$  NMR (300 MHz, DMSO- $d_6$ ):  $\delta$  = 6.99 (d, 1H,  $^3J$  = 8.8 Hz), 7.38 (dd, 1H,  $^3J$  = 8.8 Hz,  $^4J$  = 2.5 Hz), 8.00–8.07 (m, 2H), 8.31 (d, 1H,  $^3J$  = 8.4 Hz), 11.52 (s, 1H, OH), 11.99 (s, 1H, NH), 12.40 (s, 1H, NH).

$^{13}\text{C}$  NMR (62.9 MHz, DMSO- $d_6$ ):  $\delta$  = 108.5, 115.7, 120.0, 120.6, 123.0, 127.8, 132.1, 137.6, 150.3, 150.8, 157.4, 159.1, 161.8.

MS (EI, 70 eV):  $m/z$  (%) = 289 ( $\text{M}^+$ , 100), 218 (27).

HRMS (EI): calcd for  $\text{C}_{13}\text{H}_9\text{ClN}_3\text{O}_3$  ( $\text{M}+1$ ) 290.0327, found 290.0331.

IR (ATR,  $\text{cm}^{-1}$ ):  $\tilde{\nu}$  = 3167 (w), 3043 (w), 1716 (m), 1659 (m), 1586 (m), 1467 (m), 1403 (m), 1344 (m), 1265 (m), 1241 (m), 1171 (m), 1100 (w), 1045 (w), 946 (w), 829 (m), 799 (s), 773 (m), 730 (m), 693 (s), 646 (m).

28

### 7-(2-Hydroxy-5-methylphenyl)-1-methylpyrido[2,3-*d*]pyrimidine-2,4(1*H*,3*H*)-dione (19d)

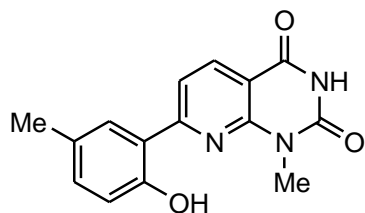

White solid, mp 332–333 °C (EE: *i*-PrOH/1:3).

$^1\text{H}$  NMR (300 MHz, DMSO- $d_6$ ):  $\delta$  = 2.29 (s, 3H, Me), 3.54 (s, 3H, NMe), 6.91 (d, 1H,  $^3J$  = 8.6 Hz), 7.16 (dd, 1H,  $^3J$  = 8.2 Hz,  $^4J$  = 2.0 Hz), 7.81 (s, 1H), 7.98 (d, 1H,  $^3J$  = 8.2 Hz), 8.35 (d, 1H,  $^3J$  = 8.2 Hz), 11.46 (br s, 2H, OH).

$^{13}\text{C}$  NMR due to bed solubility was not possible to measure.

MS (GC, 70 eV):  $m/z$  (%) = 283 ( $\text{M}^+$ , 100), 254 (33), 185 (20).

HRMS (EI): calcd for  $\text{C}_{15}\text{H}_{13}\text{N}_3\text{O}_3$  ( $\text{M}^+$ ) 283.09514, found 283.094282.

IR (ATR,  $\text{cm}^{-1}$ ):  $\tilde{\nu}$  = 3182 (w), 2764 (m), 2457 (w), 1714 (m), 1682 (s), 1595 (s), 1470 (m), 1404 (m), 1365 (m), 1277 (m), 1225 (m), 1159 (w), 1131 (w), 1078 (w), 1027 (w), 831 (m), 804 (m), 774 (m), 734 (m), 690 (m), 669 (m), 611 (w).

### 7-(5-Chloro-2-hydroxyphenyl)-1-methylpyrido[2,3-*d*]pyrimidine-2,4(1*H*,3*H*)-dione (19e)



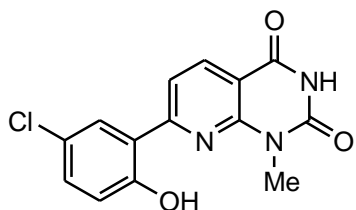

Yellow solid, mp 148–150 °C (MeOH: H<sub>2</sub>O/2:1).

<sup>1</sup>H NMR (300 MHz, DMSO-*d*<sub>6</sub>): δ = 3.54 (s, 3H, Me), 7.04 (d, 1H, <sup>3</sup>*J* = 7.8 Hz), 7.40 (d, 1H, <sup>3</sup>*J* = 8.0 Hz), 8.07–8.11 (m, 2H), 8.39 (d, 1H, <sup>3</sup>*J* = 7.3 Hz), 11.76 (s, 2H, OH, NH).

<sup>13</sup>C NMR due to bed solubility was not possible to measure.

MS (EI, 70 eV): *m/z* (%) = 303 (M<sup>+</sup>, 100), 274 (23), 205 (27), 168 (20), 99 (11), 78 (36).

HRMS (EI): calcd for C<sub>14</sub>H<sub>10</sub>ClN<sub>3</sub>O<sub>3</sub> (M<sup>+</sup>) 303.04052, found 303.040878.

IR (ATR, cm<sup>-1</sup>):  $\tilde{\nu}$  = 3047 (w), 1727 (w), 1709 (m), 1689 (m), 1594 (s), 1484 (m), 1469 (m), 1406 (s), 1365 (m), 1285 (s), 1239 (w), 1219 (w), 1202 (w), 1162 (w), 1130 (w), 1102 (w), 1074 (w), 1025 (w), 979 (w), 838 (m), 806 (m), 734 (w), 719 (s), 697 (m), 686 (m), 651 (w).

#### 7-(2-Hydroxy-5-methylphenyl)-1,3-dimethylpyrido[2,3-*d*]pyrimidine-2,4(1*H*,3*H*)-dione (19f)

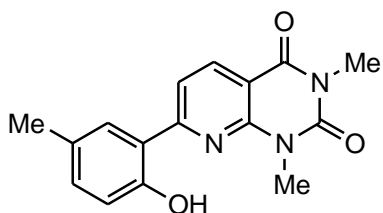

White solid, mp 304–306 °C (*i*-PrOH).

<sup>1</sup>H NMR (300 MHz, CDCl<sub>3</sub>-*d*<sub>6</sub>): δ = 2.35 (s, 3H, Me), 3.50 (s, 3H, NMe), 3.75 (s, 3H, NMe), 6.95 (d, 1H, <sup>3</sup>*J* = 8.4 Hz), 7.22 (dd, 1H, <sup>3</sup>*J* = 8.4 Hz, <sup>4</sup>*J* = 1.4 Hz), 7.65 (s, 1H), 8.53 (d, 1H, <sup>3</sup>*J* = 8.4 Hz), 12.94 (br s, 2H, OH).

<sup>13</sup>C NMR (62.9 MHz, CDCl<sub>3</sub>): δ = 20.7, 28.6, 29.8, 105.8, 108.3, 114.2, 118.6, 127.5, 128.8, 134.5, 138.7, 143.1, 149.4, 151.3, 155.0, 162.1.

MS (GC, 70 eV): *m/z* (%) = 297 (M<sup>+</sup>, 100), 268 (25), 185 (14).

HRMS (EI): calcd for C<sub>16</sub>H<sub>15</sub>N<sub>3</sub>O<sub>3</sub> (M<sup>+</sup>) 297.11079, found 297.110626.

IR (ATR, cm<sup>-1</sup>):  $\tilde{\nu}$  = 2930 (w), 1712 (w), 1652 (s), 1599 (s), 1478 (m), 1424 (s), 1395 (m), 1358 (s), 1298 (m), 1280 (s), 1233 (m), 1221 (s), 1130 (m), 1103 (m), 1063 (w), 1018 (m), 831 (m), 798 (s), 776 (m), 747 (s), 734 (m), 712 (s), 665 (m), 646 (m), 543 (m).

### 7-(5-Chloro-2-hydroxyphenyl)-1,3-dimethylpyrido[2,3-*d*]pyrimidine-2,4(1*H*,3*H*)-dione (19g)

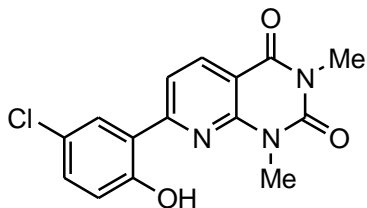

Yellow solid, mp 252–253 °C (heptane: *i*-PrOH/1:5).

<sup>1</sup>H NMR (300 MHz, DMSO-*d*<sub>6</sub>): δ = 3.32 (s, 3H, NMe), 3.62 (s, 3H, NMe), 7.11 (d, 1H, <sup>3</sup>*J* = 8.7 Hz), 6.39 (dd, 1H, <sup>3</sup>*J* = 9.0 Hz, <sup>4</sup>*J* = 3.0 Hz), 8.05 (d, 1H, <sup>3</sup>*J* = 2.7 Hz), 8.12 (d, 1H, <sup>3</sup>*J* = 8.3 Hz), 8.43 (d, 1H, <sup>3</sup>*J* = 8.3 Hz), 11.70 (s, 1H, OH).

<sup>13</sup>C NMR (75.5 MHz, DMSO-*d*<sub>6</sub>): δ = 28.1, 29.2, 108.8, 117.9, 119.2, 123.1, 123.4, 128.8, 131.5, 137.7, 149.8, 151.0, 156.3, 158.0, 160.4.

MS (GC, 70 eV): *m/z* (%) = 317 (M<sup>+</sup>, 100), 288 (21), 205 (19).

HRMS (EI): calcd for C<sub>15</sub>H<sub>12</sub>ClN<sub>3</sub>O<sub>3</sub> (M<sup>+</sup>) 317.05617, found 317.05629.

IR (ATR, cm<sup>-1</sup>):  $\tilde{\nu}$  = 3362 (w), 2962 (w), 2767 (m), 2452 (w), 1708 (m), 1658 (s), 1598 (s), 1468 (s), 1424 (s), 1354 (m), 1284 (m), 1238 (m), 1211 (m), 1122 (w), 1096 (m), 1052 (w), 1022 (m), 865 (w), 847 (m), 804 (s), 747 (m), 711 (m), 691 (m), 651 (m), 641 (m).

### 7-(2-Hydroxy-5-methylphenyl)-2-mercaptopyrido[2,3-*d*]pyrimidin-4-ol (19h)

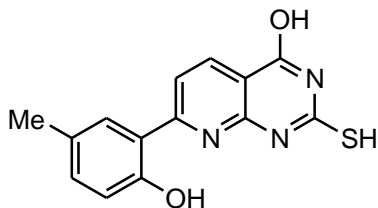

Green solid, mp 371–373 °C (heptane: *i*-PrOH/1:5).

<sup>1</sup>H NMR (300 MHz, DMSO-*d*<sub>6</sub>): δ = 2.29 (s, 3H, Me), 6.87 (d, 1H, <sup>3</sup>*J* = 8.4 Hz), 7.20 (dd, 1H, <sup>3</sup>*J* = 8.4 Hz, <sup>4</sup>*J* = 1.7 Hz), 7.87 (s, 1H), 8.04 (d, 1H, <sup>3</sup>*J* = 8.7 Hz), 8.33 (d, 1H, <sup>3</sup>*J* = 8.7 Hz), 12.08 (s, 1H, OH), 12.65 (s, 1H, OH), 13.47 (s, 1H, SH).

<sup>13</sup>C NMR (62.9 MHz, DMSO-*d*<sub>6</sub>): δ = 20.1, 109.8, 116.3, 118.0, 118.3, 127.9, 128.3, 133.8, 137.2, 149.8, 156.9, 159.2, 161.2, 175.9.

MS (GC, 70 eV): *m/z* (%) = 285 (M<sup>+</sup>, 100), 168 (26), 99 (14).

HRMS (EI): calcd for C<sub>14</sub>H<sub>11</sub>N<sub>3</sub>O<sub>2</sub>S (M<sup>+</sup>) 285.05665, found 285.056686.

IR (ATR,  $\text{cm}^{-1}$ ):  $\tilde{\nu}$  = 3134 (w), 3018 (w), 2768 (w), 1683 (m), 1609 (s), 1589 (s), 1567 (s), 1545 (s), 1481 (s), 1417 (m), 1282 (m), 1239 (s), 1200 (s), 1161 (s), 1133 (s), 1052 (w), 988 (w), 836 (m), 812 (s), 777 (s), 692 (m), 660 (m), 610 (w), 578 (s), 543 (s).

### 7-(5-Bromo-2-hydroxyphenyl)-4-mercaptopyrido[2,3-*d*]pyrimidin-2-ol (19i)

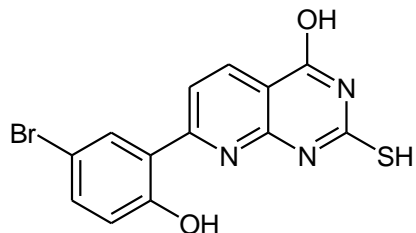

Brown solid, mp > 375 °C (heptane: *i*-PrOH/1:5).

$^1\text{H}$  NMR (300 MHz,  $\text{DMSO-}d_6$ ):  $\delta$  = 7.00 (d, 1H,  $^3J$  = 8.8 Hz), 7.52 (dd, 1H,  $^3J$  = 8.8 Hz,  $^4J$  = 2.5 Hz), 8.14 (d, 1H,  $^3J$  = 8.6 Hz), 8.23 (s, 1H), 8.34 (d, 1H,  $^3J$  = 8.6 Hz), 12.20 (s, 1H, OH), 12.67 (s, 1H, OH), 13.44 (s, 1H, SH).

$^{13}\text{C}$  NMR (62.9 MHz,  $\text{DMSO-}d_6$ ):  $\delta$  = 110.4, 110.5, 117.5, 120.5, 121.2, 130.9, 135.1, 137.3, 150.0, 157.8, 159.2, 159.4, 175.9.

MS (GC, 70 eV):  $m/z$  (%) = 348 ( $\text{M}^+$ , 100), 207 (16).

HRMS (EI): calcd for  $\text{C}_{13}\text{H}_8\text{BrN}_3\text{O}_2\text{S}$  ( $\text{M}^+$ ) 348.95151, found 348.950828.

IR (ATR,  $\text{cm}^{-1}$ ):  $\tilde{\nu}$  = 3184 (w), 2932 (w), 2758 (m), 2456 (w), 1665 (s), 1621 (m), 1586 (s), 1548 (m), 1470 (s), 1413 (m), 1356 (s), 1272 (s), 1236 (s), 1205 (s), 1175 (s), 1087 (w), 1026 (w), 939 (w), 838 (m), 814 (m), 787 (s), 723 (m), 664 (m).

### 7-(5-Chloro-2-hydroxyphenyl)-2-mercaptopyrido[2,3-*d*]pyrimidin-4-ol (19j)

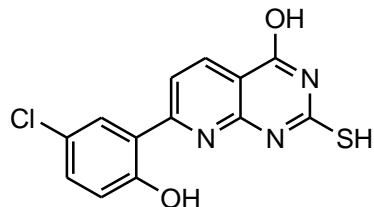

Yellow solid, mp > 375 °C (MeOH:  $\text{H}_2\text{O}$ /2:1).

$^1\text{H}$  NMR (250 MHz,  $\text{DMSO-}d_6$ ):  $\delta$  = 7.01 (d, 1H,  $^3J$  = 8.4 Hz), 7.41 (td, 1H,  $^3J$  = 8.8 Hz,  $^4J$  = 2.5 Hz), 8.11–8.15 (m, 2H), 8.35 (d, 1H,  $^3J$  = 8.4 Hz), 12.24 (s, 1H, OH), 12.69 (s, 1H, OH), 13.47 (s, 1H, SH).

$^{13}\text{C}$  NMR (62.9 MHz,  $\text{DMSO-}d_6$ ):  $\delta$  = 110.5, 117.1, 120.2, 120.3, 123.1, 127.8, 132.4, 137.4, 149.9, 157.6, 159.2, 159.5, 176.0.

MS (GC, 70 eV):  $m/z$  (%) = 305 ( $M^+$ , 100), 277 (12), 218 (12), 168 (28), 99 (16).

HRMS (EI): calcd for  $C_{13}H_8ClN_3O_2S$  ( $M^+$ ) 305.00203, found 305.001007.

IR (ATR,  $cm^{-1}$ ):  $\tilde{\nu}$  = 3186 (w), 1665 (m), 1606 (m), 1587 (s), 1558 (m), 1470 (m), 1414 (m), 1356 (m), 1271 (m), 1236 (m), 1192 (m), 1136 (m), 1098 (w), 1051 (w), 941 (w), 838 (m), 815 (m), 785 (s), 735 (m), 699 (w), 667 (m), 575 (m), 540 (m).

### 2-(2,4-Diaminopyrido[2,3-*d*]pyrimidin-7-yl)-4-methylphenol (20a)

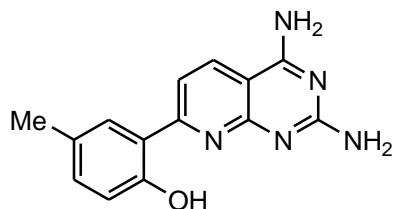

Yellow solid, mp 352–354 °C (EE: *i*-PrOH/2:1).

$^1H$  NMR (250 MHz,  $DMSO-d_6$ ):  $\delta$  = 2.28 (s, 3H, Me), 6.90 (d, 1H,  $^3J = 8.2$  Hz), 7.19 (d, 1H,  $^3J = 8.0$  Hz), 7.88 (br s, 2H,  $NH_2$ ), 8.17 (d, 1H,  $^3J = 8.5$  Hz), 8.50 (br s, 1H,  $NH_2$ ), 8.87 (d, 1H,  $^3J = 8.5$  Hz), 9.04 (br s, 1H,  $NH_2$ ), 11.94 (br s, 1H,  $NH_2$ ), 13.20 (s, 1H, OH).

$^{13}C$  NMR (62.9 MHz,  $DMSO-d_6$ ):  $\delta$  = 20.1, 103.1, 117.5, 117.8, 118.9, 128.0, 128.9, 133.8, 135.5, 148.7, 156.0, 156.6, 161.6, 162.7.

MS (GC, 70 eV):  $m/z$  (%) = 267 ( $M^+$ , 100).

HRMS (EI): calcd for  $C_{14}H_{13}N_5O$  ( $M^+$ ) 267.11146, found 267.111500.

IR (ATR,  $cm^{-1}$ ):  $\tilde{\nu}$  = 3412 (w), 3131 (w), 2861 (w), 1645 (m), 1608 (m), 1524 (w), 1480 (m), 1460 (m), 1370 (m), 1344 (m), 1291 (m), 1242 (m), 1214 (m), 1184 (m), 1147 (m), 1043 (m), 1004 (m), 874 (w), 835 (m), 800 (s), 770 (m), 742 (s), 701 (s), 674 (s), 646 (s).

### 2-(2,4-Diaminopyrido[2,3-*d*]pyrimidin-7-yl)-4-chlorophenol (20b)

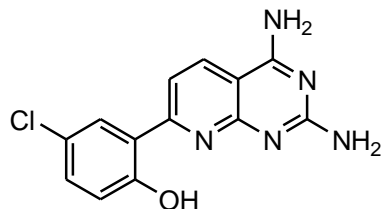

Yellow solid, mp > 375 °C (EE: *i*-PrOH/1:3).

$^1\text{H}$  NMR (250 MHz, DMSO- $d_6$ ):  $\delta$  = 7.08 (d, 1H,  $^3J$  = 8.9 Hz), 7.40 (td, 1H,  $^3J$  = 8.9 Hz,  $^4J$  = 2.5 Hz), 7.81 (br s, 1H, NH<sub>2</sub>), 8.08 (d, 1H,  $^3J$  = 2.5 Hz), 8.23 (d, 1H,  $^3J$  = 8.9 Hz), 8.52 (br s, 1H, NH<sub>2</sub>), 8.88 (d, 1H,  $^3J$  = 8.5 Hz), 9.07 (br s, 1H, NH<sub>2</sub>), 9.41 (br s, 1H, NH<sub>2</sub>), 12.04 (s, 1H, OH).

$^{13}\text{C}$  NMR (62.9 MHz, DMSO- $d_6$ ):  $\delta$  = 103.4, 118.5, 119.7, 121.6, 123.1, 128.4, 132.1, 135.6, 148.9, 156.1, 157.0, 159.7, 162.7.

MS (GC, 70 eV):  $m/z$  (%) = 287 (M<sup>+</sup>, 100), 122 (16), 105 (36), 77 (16).

HRMS (ESI): calcd for C<sub>13</sub>H<sub>11</sub>ClN<sub>5</sub>O (M+1) 288.06466, found 288.06522.

IR (ATR, cm<sup>-1</sup>):  $\tilde{\nu}$  = 3307 (w), 3140 (w), 2586 (w), 1682 (w), 1645 (s), 1605 (s), 1525 (w), 1453 (s), 1400 (w), 1285 (m), 1235 (m), 1192 (m), 1145 (w), 1041 (w), 981 (w), 802 (s), 738 (m), 695 (m).

#### 4-Bromo-2-(2-(piperidin-1-yl)thiazolo[4,5-*b*]pyridin-5-yl)phenol (21a)

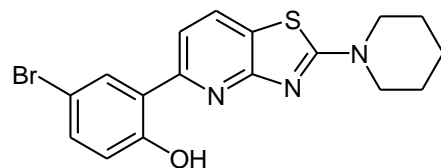

Brown solid, mp 194–196 °C (EE: *i*-PrOH/1:2).

$^1\text{H}$  NMR (300 MHz, DMSO- $d_6$ ):  $\delta$  = 1.66 (s, 6H, CH<sub>2</sub>), 3.67 (s, 4H, CH<sub>2</sub>), 6.87–6.90 (m, 1H), 7.42 (s, 1H), 7.89 (s, 1H), 8.16 (s, 1H), 8.33–8.35 (s, 1H), 14.15 (s, 1H, OH).

$^{13}\text{C}$  NMR due to bed solubility was not possible to measure.

MS (EI, 70 eV):  $m/z$  (%) = 389 (M<sup>+</sup>, 100).

HRMS (ESI): calcd for C<sub>17</sub>H<sub>17</sub>BrN<sub>3</sub>OS (M+H) 390.02702, found 390.02783.

IR (ATR, cm<sup>-1</sup>):  $\tilde{\nu}$  = 2925 (w), 1573 (m), 1523 (s), 1485 (m), 1423 (m), 1365 (m), 1328 (m), 1281 (s), 1272 (s), 1249 (s), 1213 (s), 1172 (m), 1123 (m), 1086 (m), 1009 (m), 956 (w), 909 (m), 872 (m), 857 (m), 823 (s), 811 (s), 747 (m), 696 (w), 655 (m), 622 (m).

#### 4-Chloro-2-(2-(piperidin-1-yl)thiazolo[4,5-*b*]pyridin-5-yl)phenol (21b)

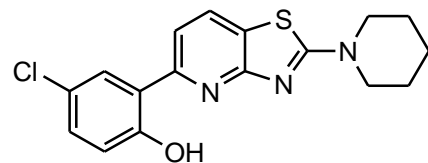

Brown solid, mp 178–180 °C (EE: *i*-PrOH/1:2).

$^1\text{H}$  NMR (300 MHz,  $\text{CDCl}_3$ ):  $\delta$  = 1.72 (s, 6H,  $\text{CH}_2$ ), 3.66 (s, 4H,  $\text{CH}_2$ ), 6.97 (d, 1H,  $^3J$  = 8.5 Hz), 7.18 (dd, 1H,  $^3J$  = 8.7 Hz,  $^4J$  = 1.8 Hz), 7.42 (d, 1H,  $^3J$  = 8.2 Hz), 7.69 (d, 1H,  $^3J$  = 2.2 Hz), 7.91 (d, 1H,  $^3J$  = 8.2 Hz), 13.77 (s, 1H, OH).

$^{13}\text{C}$  NMR (62.9 MHz,  $\text{CDCl}_3$ ):  $\delta$  = 24.0, 25.3, 49.6, 111.3, 119.9, 120.4, 123.3, 123.4, 125.9, 130.3, 130.5, 153.0, 158.0, 161.4, 170.6.

MS (EI, 70 eV):  $m/z$  (%) = 345 ( $\text{M}^+$ , 100), 316 (21), 289 (16), 227 (15), 207 (11), 172 (11), 155 (16).

HRMS (ESI): calcd for  $\text{C}_{17}\text{H}_{17}\text{ClN}_3\text{OS}$  ( $\text{M}+\text{H}$ ) 346.07754, found 346.07691.

IR (ATR,  $\text{cm}^{-1}$ ):  $\tilde{\nu}$  = 2925 (w), 1573 (w), 1519 (m), 1487 (m), 1423 (m), 1360 (m), 1326 (m), 1269 (s), 1244 (s), 1214 (s), 1122 (m), 1042 (w), 1009 (w), 957 (w), 901 (m), 857 (m), 824 (s), 811 (s), 747 (m), 730 (m), 698 (w), 666 (s), 623 (m).

#### 4-Chloro-2-(2-morpholinothiazolo[4,5-*b*]pyridin-5-yl)phenol (21c)

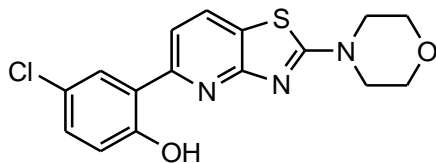

Red-brown solid, mp 257–259 °C (EE: *i*-PrOH/1:2).

$^1\text{H}$  NMR (300 MHz,  $\text{DMSO}-d_6$ ):  $\delta$  = 3.74 (s, 8H,  $\text{CH}_2$ ), 6.96 (s, 1H), 7.30 (s, 1H), 7.95–8.07 (m, 2H), 8.40 (s, 1H), 14.05 (s, 1H, OH).

$^{13}\text{C}$  NMR (62.9 MHz,  $\text{CDCl}_3$ ):  $\delta$  = 47.9, 65.4, 112.8, 119.6, 120.9, 122.6, 123.4, 126.5, 130.3, 131.9, 152.3, 157.5, 160.8, 171.2.

MS (EI, 70 eV):  $m/z$  (%) = 347 ( $\text{M}^+$ , 62), 269 (100), 206 (12).

HRMS (EI): calcd for  $\text{C}_{16}\text{H}_{14}\text{ClN}_3\text{O}_2\text{S}$  ( $\text{M}^+$ ) 347.04898, found 347.048741.

IR (ATR,  $\text{cm}^{-1}$ ):  $\tilde{\nu}$  = 2966 (w), 1575 (w), 1529 (s), 1478 (m), 1426 (m), 1371 (m), 1330 (m), 1280 (s), 1230 (s), 1217 (m), 1189 (m), 1115 (s), 1030 (m), 965 (w), 896 (m), 872 (m), 825 (s), 730 (m), 666 (s), 621 (m).

#### 4-Chloro-2-(2-(dimethylamino)thiazolo[4,5-*b*]pyridin-5-yl)phenol (21d)

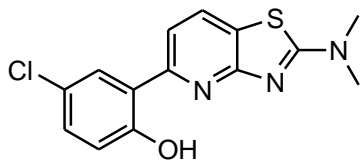

Brown solid, mp 255–256 °C (EE: *i*-PrOH/1:3).

$^1\text{H}$  NMR (250 MHz,  $\text{DMSO}-d_6$ ):  $\delta$  = 3.23 (s, 6H, Me), 6.94 (d, 1H,  $^3J$  = 8.1 Hz), 7.30 (d, 1H,  $^3J$  = 7.0 Hz), 7.89 (d, 1H,  $^3J$  = 7.6 Hz), 8.06 (s, 1H), 8.36 (d, 1H,  $^3J$  = 7.6 Hz), 14.21 (s, 1H, OH).

$^{13}\text{C}$  NMR (62.9 MHz,  $\text{CDCl}_3$ ):  $\delta = 26.1, 112.1, 119.6, 120.9, 122.5, 124.0, 126.4, 130.3, 131.6, 134.0, 152.1, 157.6, 161.2$ .

MS (EI, 70 eV):  $m/z$  (%) = 305 ( $\text{M}^+$ , 100), 290 (12), 276 (12).

HRMS (ESI): calcd for  $\text{C}_{14}\text{H}_{13}\text{ClN}_3\text{OS}$  ( $\text{M}+\text{H}$ ) 306.04624, found 306.04684.

IR (ATR,  $\text{cm}^{-1}$ ):  $\tilde{\nu} = 2890$  (w), 1598 (w), 1579 (w), 1538 (m), 1488 (w), 1404 (w), 1348 (m), 1278 (m), 1218 (m), 1173 (m), 1140 (m), 1100 (w), 1083 (m), 961 (w), 914 (m), 877 (m), 817 (s), 747 (m), 731 (m), 709 (m), 660 (s).

### 2-(3-Methyl-1-phenyl-1*H*-pyrazolo[3,4-*b*]pyridin-6-yl)naphthalen-1-ol (22)

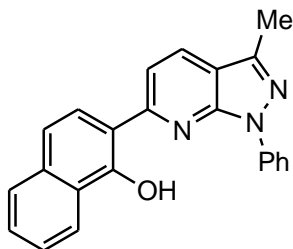

White solid, mp 186–187 °C (from EE: *i*-PrOH/1:2).

$^1\text{H}$  NMR (300 MHz,  $\text{DMSO-}d_6$ ):  $\delta = 2.65$  (s, 3H, Me), 7.46–7.71 (m, 6H), 7.88–7.97 (m, 3H), 8.20–8.25 (m, 2H), 8.33 (d, 1H,  $^3J = 8.0$  Hz), 8.57 (d, 1H,  $^3J = 8.5$  Hz), 14.88 (s, 1H, OH).

$^{13}\text{C}$  NMR (62.9 MHz,  $\text{DMSO-}d_6$ ):  $\delta = 12.1, 112.0, 113.8, 115.2, 118.6, 121.9, 123.0, 124.3, 125.3, 125.6, 126.8, 127.3, 128.1, 129.6, 132.9, 134.9, 138.2, 143.5, 146.8, 156.2, 156.7$ .

MS (GC, 70 eV):  $m/z$  (%) = 351 ( $\text{M}^+$ , 100).

HRMS (ESI): calcd for  $\text{C}_{23}\text{H}_{18}\text{N}_3\text{O}$  ( $\text{M}+\text{H}$ ) 352.1444, found 352.14452.

IR (ATR,  $\text{cm}^{-1}$ ):  $\tilde{\nu} = 3400$  (w), 2980 (m), 2763 (s), 2456 (w), 1582 (s), 1508 (m), 1480 (m), 1431 (m), 1389 (s), 1349 (m), 1304 (m), 1231 (m), 1176 (m), 1148 (w), 1119 (w), 1057 (m), 1023 (m), 948 (w), 850 (m), 804 (m), 790 (s), 772 (s), 753 (s), 722 (m), 691 (s), 648 (s), 608 (m), 570 (m).

### 5-(1-Hydroxynaphthalen-2-yl)-1-methyl-3-phenyl-1*H*-imidazo[4,5-*b*]pyridine-2(3*H*)-thione (23)

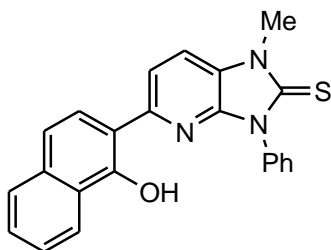

Green solid, mp 305–306 °C (*i*-PrOH).

$^1\text{H}$  NMR (300 MHz, DMSO- $d_6$ ):  $\delta$  = 3.85 (s, 3H, Me), 7.42–7.54 (m, 3H), 7.64–7.73 (m, 5H, Ph), 7.82 (d, 1H), 8.09–8.24 (m, 4H), 13.61 (br s, 1H, OH).

$^{13}\text{C}$  NMR due to bed solubility was not possible to measure.

MS (GC, 70 eV):  $m/z$  (%) = 383 ( $\text{M}^+$ , 100), 207 (13).

HRMS (EI): calcd for  $\text{C}_{23}\text{H}_{17}\text{N}_3\text{OS}$  ( $\text{M}^+$ ) 383.10868, found 383.107368.

IR (ATR,  $\text{cm}^{-1}$ ):  $\tilde{\nu}$  = 3049 (w), 1614 (w), 1569 (w), 1499 (w), 1462 (s), 1438 (m), 1402 (m), 1337 (s), 1295 (s), 1223 (m), 1203 (m), 1139 (m), 1063 (w), 1027 (w), 977 (w), 853 (w), 795 (s), 769 (m), 723 (m), 704 (m), 622 (m).

#### 7-(1-Hydroxynaphthalen-2-yl)-4-mercaptopyrido[2,3-*d*]pyrimidin-2-ol (24)

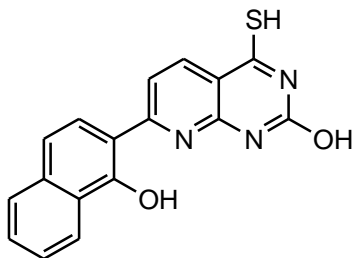

Brown solid, mp 278–280 °C (EE: *i*-PrOH/1:1).

$^1\text{H}$  NMR (300 MHz, DMSO- $d_6$ ):  $\delta$  = 7.41 (d, 1H,  $^3J$  = 8.8 Hz), 7.51–7.62 (m, 2H), 7.83 (d, 1H,  $^3J$  = 7.5 Hz), 8.03–8.06 (m, 2H), 8.30–8.35 (m, 2H), 12.65 (s, 1H, OH), 13.56 (s, 1H, OH), 13.99 (s, 1H, SH).

$^{13}\text{C}$  NMR (62.9 MHz, DMSO- $d_6$ ):  $\delta$  = 109.4, 110.8, 115.8, 118.6, 123.3, 123.8, 125.4, 125.8, 127.3, 128.6, 135.4, 137.3, 149.5, 157.2, 159.1, 161.2, 175.9.

MS (GC, 70 eV):  $m/z$  (%) = 321 ( $\text{M}^+$ , 100), 234 (12), 78 (12).



HRMS (EI): calcd for  $C_{17}H_{11}N_3O_2S$  ( $M^+$ ) 321.05665, found 321.056049.

IR (ATR,  $cm^{-1}$ ):  $\tilde{\nu} = 3284$  (w), 1702 (w), 1672 (m), 1611 (m), 1581 (m), 1554 (m), 1512 (m), 1472 (m), 1396 (s), 1344 (m), 1273 (m), 1242 (m), 1207 (m), 1178 (s), 1148 (m), 1126 (s), 1108 (m), 949 (w), 868 (s), 808 (m), 786 (s), 764 (s), 723 (m), 650 (m).

### 6-(3-(Trifluoromethyl)phenyl)-1,2-dihydro-2-phenylpyrazolo[3,4-*b*]pyridin-3-one (26a)

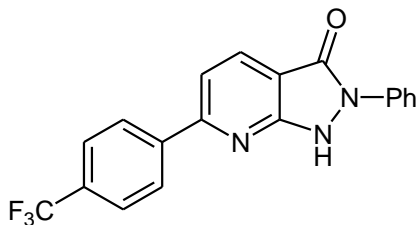

Yellow solid, mp 161–162 °C (EE: *i*-PrOH/1:3).

$^1H$  NMR (300 MHz, DMSO- $d_6$ ):  $\delta = 7.20$ – $7.31$  (m, 1H), 7.45–7.55 (m, 2H), 7.90–7.95 (m, 5H), 8.34–8.40 (m, 3H), 8.32–8.44 (m, 5H), 11.80 (br s, 1H, NH).

$^{19}F$  NMR (282 MHz, DMSO- $d_6$ ):  $\delta = -61.2$ .

$^{13}C$  NMR due to bed solubility it was not possible to measure.

MS (GC, 70 eV):  $m/z$  (%) = 355 ( $M^+$ , 100), 286 (37).

HRMS (EI): calcd for  $C_{20}H_{14}F_3N_3$  ( $M^+$ ) 355.09221, found 355.09222.

IR (ATR,  $cm^{-1}$ ):  $\tilde{\nu} = 3382$  (w), 3013 (m), 2773 (m), 2448 (w), 1651 (m), 1620 (m), 1594 (m), 1501 (m), 1467 (w), 1441 (m), 1403 (m), 1325 (m), 1301 (m), 1158 (m), 1120 (s), 1067 (s), 1017 (s), 935 (w), 857 (m), 825 (s), 792 (s), 746 (s), 711 (s), 682 (s).

### 1,2-Dihydro-6-(4-methoxyphenyl)-2-phenylpyrazolo[3,4-*b*]pyridin-3-one (26b)

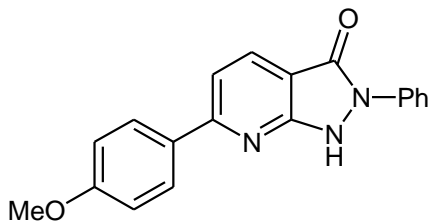

Orange solid, mp 173–174 °C (EE: *i*-PrOH/1:2).

$^1\text{H}$  NMR (300 MHz,  $\text{DMSO-}d_6$ ):  $\delta$  = 3.88 (s, 3H, OMe), 7.11 (d, 2H,  $^3J$  = 8.9 Hz), 7.24–7.29 (m, 1H), 7.49–7.55 (m, 2H), 7.75 (d, 1H,  $^3J$  = 8.3 Hz), 7.93–7.96 (m, 2H), 8.16 (d, 2H,  $^3J$  = 8.9 Hz), 8.23 (d, 1H,  $^3J$  = 8.1 Hz), 10.31 (br s, 1H, NH).

$^{13}\text{C}$  NMR (75.5 MHz,  $\text{DMSO-}d_6$ ):  $\delta$  = 55.4, 108.5, 113.9, 114.4, 118.8, 119.3, 125.0, 128.9, 129.0, 129.9, 134.2, 135.7, 137.4, 157.4, 158.7, 159.6, 161.1.

MS (EI, 70 eV):  $m/z$  (%) = 317 ( $\text{M}^+$ , 100), 288 (20).

HRMS (EI): calcd for  $\text{C}_{19}\text{H}_{15}\text{N}_3\text{O}_2$  ( $\text{M}^+$ ) 317.11588, found 317.115965.

IR (ATR,  $\text{cm}^{-1}$ ):  $\tilde{\nu}$  = 2936 (w), 2761 (m), 2456 (m), 1899 (w), 1630 (w), 1594 (m), 1576 (m), 1529 (w), 1479 (m), 1439 (m), 1381 (w), 1356 (m), 1319 (m), 1299 (m), 1257 (s), 1221 (m), 1182 (m), 1149 (m), 1064 (m), 1025 (m), 943 (w), 889 (w), 836 (w), 809 (m), 783 (m), 769 (m), 754 (m), 721 (w), 693 (m), 670 (w).

### 6-(2-Fluorophenyl)-1,2-dihydro-2-phenylpyrazolo[3,4-*b*]pyridin-3-one (26c)

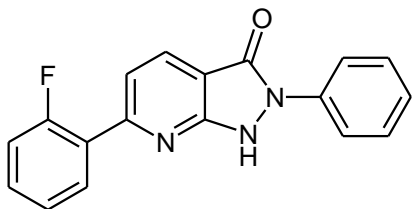

Brown solid, mp 241–243 °C (heptane: *i*-PrOH/1:2).

$^1\text{H}$  NMR (300 MHz,  $\text{DMSO-}d_6$ ):  $\delta$  = 7.25–7.30 (m, 1H), 7.36–7.42 (m, 2H), 7.49–7.60 (m, 4H), 7.92–8.00 (m, 3H), 8.32 (d, 1H,  $^3J$  = 8.3 Hz), 11.65 (br s, 1H, NH).

$^{19}\text{F}$  NMR (282 MHz,  $\text{DMSO-}d_6$ ):  $\delta$  = –115.9.

$^{13}\text{C}$  NMR due to bed solubility it was not possible to measure.

MS (GC, 70 eV):  $m/z$  (%) = 305 ( $\text{M}^+$ , 100), 276 (41), 207 (15), 77 (17).

HRMS (ESI): calcd for  $\text{C}_{18}\text{H}_{13}\text{FN}_3\text{O}$  ( $\text{M}+\text{H}$ ) 306.10372, found 306.10335.

IR (ATR,  $\text{cm}^{-1}$ ):  $\tilde{\nu}$  = 3043 (w), 1643 (m), 1593 (m), 1497 (m), 1441 (m), 1415 (m), 1335 (w), 1302 (m), 1280 (m), 1203 (m), 1128 (w), 1085 (w), 1026 (w), 937 (w), 893 (w), 789 (w), 760 (s), 740 (s), 712 (w), 661 (s), 590 (s).

### 1,2-Dihydro-2-phenyl-6-(pyridin-3-yl)pyrazolo[3,4-*b*]pyridin-3-one (26d)

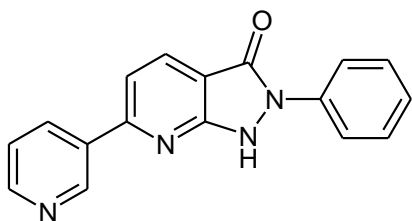

Yellow solid, mp 268–270 °C (MeOH).

$^1\text{H}$  NMR (300 MHz,  $\text{DMSO-}d_6$ ):  $\delta$  = 7.25–7.31 (m, 1H), 7.50–7.55 (m, 2H), 7.91–7.94 (m, 2H), 8.01–8.10 (m, 2H), 8.42 (d, 1H,  $^3J$  = 8.1 Hz), 8.96 (d, 1H,  $^3J$  = 5.2 Hz), 9.09 (d, 1H,  $^3J$  = 8.7 Hz), 9.53 (s, 1H), 11.90 (br s, 1H, NH).

$^{13}\text{C}$  NMR (62.9 MHz,  $\text{CF}_3\text{COOD/DMSO-}d_6$ ):  $\delta$  = 127.3, 131.5, 133.2, 133.3, 137.1, 140.9, 141.0, 144.2, 145.4, 149.1, 157.0, 157.8, 160.5, 164.5, 165.9.

MS (GC, 70 eV):  $m/z$  (%) = 288 ( $\text{M}^+$ , 100), 259 (50), 77 (28).

HRMS (EI): calcd for  $\text{C}_{17}\text{H}_{12}\text{N}_4\text{O}$  ( $\text{M}+\text{H}$ ) 288.10056, found 288.100698.

IR (ATR,  $\text{cm}^{-1}$ ):  $\tilde{\nu}$  = 3052 (w), 2442 (m), 2062 (w), 1651 (s), 1607 (m), 1538 (m), 1495 (m), 1445 (m), 1422 (m), 1345 (m), 1304 (s), 1280 (m), 1236 (m), 1173 (w), 1134 (w), 1108 (w), 1034 (w), 1016 (w), 941 (w), 814 (m), 789 (m), 770 (s), 724 (m), 680 (s), 623 (m), 602 (m).

### 1,2-Dihydro-2-phenyl-6-(pyridin-4-yl)pyrazolo[3,4-*b*]pyridin-3-one (26e)

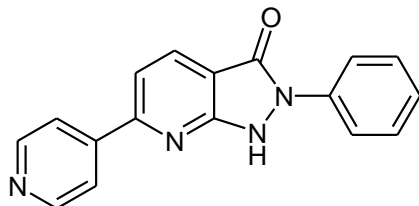

Yellow solid, mp 272–274 °C (MeOH).

$^1\text{H}$  NMR (300 MHz,  $\text{CF}_3\text{COOD/DMSO-}d_6$ ):  $\delta$  = 7.20–7.25 (m, 3H), 7.38–7.41 (m, 2H), 7.69 (d, 1H,  $^3J$  = 8.2 Hz), 8.37–8.42 (m, 3H), 8.60–8.62 (m, 2H).

$^{13}\text{C}$  NMR (75.5 MHz,  $\text{CF}_3\text{COOD/DMSO-}d_6$ ):  $\delta$  = 114.2, 121.5, 127.8, 129.6, 133.6, 1339, 137.1, 141.4, 145.8, 157.0, 158.4, 158.5, 160.6.

MS (EI, 70 eV):  $m/z$  (%) = 288 ( $\text{M}^+$ , 100), 259 (39).

HRMS (ESI): calcd for  $\text{C}_{17}\text{H}_{13}\text{N}_4\text{O}$  ( $\text{M}+\text{H}$ ) 289.10839, found 289.10874.

IR (ATR,  $\text{cm}^{-1}$ ):  $\tilde{\nu}$  = 3059 (w), 2397 (m), 2068 (w), 1652(m), 1630 (m), 1591 (m), 1510 (w),

1496 (m), 1442 (m), 1417 (m), 1343 (w), 1300 (m), 1279 (m), 1188 (w), 1128 (w), 1083 (w), 1001 (w), 942 (w), 841 (w), 814 (m), 786 (m), 767 (s), 718 (m), 689 (m), 634 (m), 601 (m).

### 1-Cyclohexyl-6-(4-methoxyphenyl)-1H-pyrrolo[2,3-b]pyridine-3-carbonitrile (27)

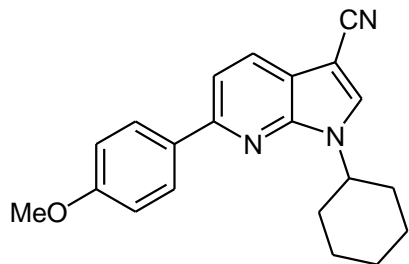

Yellow solid, mp 150–152 °C (EE: *i*-PrOH/1:3).

<sup>1</sup>H NMR (300 MHz, DMSO-*d*<sub>6</sub>): δ = 1.20–1.57 (m, 3H, CH<sub>2</sub>), 1.72–1.93 (m, 5H, CH<sub>2</sub>), 2.01–2.04 (m, 2H, CH<sub>2</sub>), 3.83 (s, 3H, OMe), 4.76–4.84 (m, 1H, NCH), 7.07 (d, 2H, <sup>3</sup>*J* = 8.9 Hz), 7.84 (d, 1H, <sup>3</sup>*J* = 8.5 Hz), 8.10–8.14 (m, 3H), 8.58 (s, 1H).

<sup>13</sup>C NMR (62.9 MHz, DMSO-*d*<sub>6</sub>): δ = 24.9, 25.2, 32.4, 54.0, 55.2, 82.5, 114.2, 114.6, 115.6, 117.8, 128.0, 128.4, 131.0, 135.3, 145.6, 151.5, 160.1.

MS (GC, 70 eV): *m/z* (%) = 331 (M<sup>+</sup>, 46), 249 (100), 234 (11), 206 (13).

HRMS (EI): calcd for C<sub>21</sub>H<sub>21</sub>N<sub>3</sub>O (M<sup>+</sup>) 331.4112, found 331.41121.

IR (ATR, cm<sup>-1</sup>):  $\tilde{\nu}$  = 2922 (m), 2851 (m), 2221 (m), 1698 (w), 1600 (m), 1581 (m), 1513 (m), 1467 (m), 1427 (m), 1396 (m), 1304 (w), 1279 (m), 1251 (s), 1222 (m), 1179 (s), 1106 (m), 1027 (m), 891 (w), 838 (m), 798 (s), 779 (s), 641 (m), 611 (s).

### 6-(3-(Trifluoromethyl)phenyl)-3-methyl-1-phenyl-1H-pyrazolo[3,4-b]pyridine (28a)

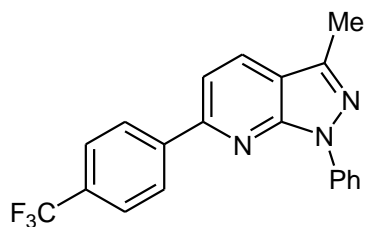

Yellow solid, mp 151–152 °C (column chromatography, EE: heptane/2:1).

$^1\text{H}$  NMR (300 MHz, DMSO- $d_6$ ):  $\delta$  = 2.62 (s, 3H, Me), 7.29–7.34 (m, 1H), 7.54–7.59 (m, 2H), 7.89 (d, 2H,  $^3J$  = 8.5 Hz), 7.97 (d, 1H,  $^3J$  = 8.5 Hz), 8.32–8.44 (m, 5H).

$^{19}\text{F}$  NMR (282 MHz, DMSO- $d_6$ ):  $\delta$  = -61.0

$^{13}\text{C}$  NMR (62.9 MHz, DMSO- $d_6$ ):  $\delta$  = 12.3, 115.1, 116.3, 119.9, 122.4 (q,  $^1J$  = 281 Hz,  $\text{CF}_3$ ), 125.4, 125.8, 128.1, 129.2, 129.6, 130.6 (q,  $^2J$  = 24 Hz,  $\text{CCF}_3$ ), 131.9, 142.3, 143.0, 150.2, 150.9, 154.2, 165.5.

MS (GC, 70 eV):  $m/z$  (%) = 353 ( $\text{M}^+$ , 100), 338 (17).

HRMS (EI): calcd for  $\text{C}_{20}\text{H}_{14}\text{F}_3\text{N}_3$  ( $\text{M}+1$ ) 354.12126, found 354.12094.

IR (ATR,  $\text{cm}^{-1}$ ):  $\tilde{\nu}$  = 3081 (m), 1615 (w), 1592 (m), 1504 (s), 1394 (m), 1315 (s), 1283 (m), 1164 (s), 1124 (s), 1081 (m), 1068 (s), 1013 (m), 956 (w), 908 (w), 856 (w), 838 (w), 815 (s), 749 (s), 690 (s), 665 (s), 593 (m).

### 6-(2-Fluorophenyl)-3-methyl-1-phenyl-1H-pyrazolo[3,4-b]pyridine (28b)

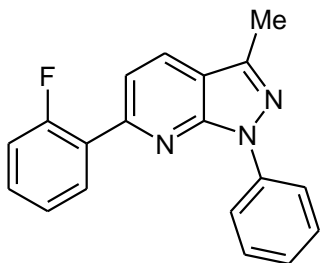

Yellow solid, mp 110 °C (column chromatography, EE: heptane/1:1).

$^1\text{H}$  NMR (300 MHz, DMSO- $d_6$ ):  $\delta$  = 2.62 (s, 3H, Me), 7.26–7.31 (m, 1H), 7.35–7.42 (m, 2H), 7.51–7.58 (m, 3H), 7.70 (dd, 1H,  $^3J$  = 8.4 Hz,  $^4J$  = 2.2 Hz), 8.01 (dt, 1H,  $^3J$  = 8.4 Hz,  $^3J$  = 2.0 Hz), 8.30–8.33 (m, 2H), 8.41 (d, 1H,  $^3J$  = 7.8 Hz).

$^{19}\text{F}$  NMR (282 MHz, DMSO- $d_6$ ):  $\delta$  = -116.6.

$^{13}\text{C}$  NMR (62.9 MHz, DMSO- $d_6$ ):  $\delta$  = 12.2, 113.2 (d,  $^1J$  = 240 Hz), 115.6, 116.4 (d,  $^2J$  = 22.7 Hz), 118.0 (d,  $^3J$  = 8.0 Hz), 119.8, 125.0 (d,  $^4J$  = 3.5 Hz), 125.3, 126.9 (d,  $^3J$  = 11.4 Hz), 129.1, 131.0, 131.3, 142.9, 150.1, 152.4 (d,  $^4J$  = 2.8 Hz), 158.0, 162.0.

MS (GC, 70 eV):  $m/z$  (%) = 303 ( $\text{M}^+$ , 100), 288 (21).

HRMS (EI): calcd for  $\text{C}_{19}\text{H}_{14}\text{FN}_3$  ( $\text{M}^+$ ) 303.11663, found 303.116564.

IR (ATR,  $\text{cm}^{-1}$ ):  $\tilde{\nu}$  = 2924 (w), 1596 (m), 1504 (m), 1493 (m), 1461 (m), 1392 (s), 1309 (m), 1286 (m), 1205 (m), 1161 (m), 1107 (m), 1088 (m), 1030 (m), 957 (w), 901 (w), 820 (m), 797 (m), 742 (s), 682 (s), 658 (s), 631 (m), 598 (m).

### 3-Methyl-1-phenyl-6-(pyridin-3-yl)-1H-pyrazolo[3,4-b]pyridine (28c)

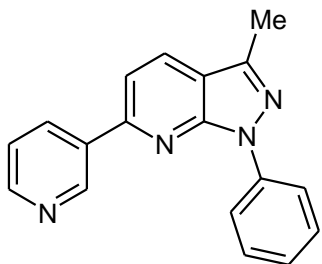

Yellow solid, mp 196–198 °C (*i*-PrOH).

<sup>1</sup>H NMR (300 MHz, DMSO-*d*<sub>6</sub>): δ = 2.63 (s, 3H, Me), 7.30–7.35 (m, 1H), 7.54–7.59 (m, 2H), 8.07–8.13 (m, 2H), 8.28–8.31 (m, 2H), 8.52 (d, 1H, <sup>3</sup>*J* = 8.3 Hz), 8.94 (dd, 1H, <sup>3</sup>*J* = 5.4 Hz, <sup>4</sup>*J* = 1.0 Hz), 9.16 (dt, 1H, <sup>3</sup>*J* = 8.3 Hz, <sup>4</sup>*J* = 1.8 Hz), 9.59 (s, 1H).

<sup>13</sup>C NMR (62.9 MHz, DMSO-*d*<sub>6</sub>): δ = 12.2, 115.1, 116.8, 120.0, 125.5, 126.7, 129.2, 132.2, 136.4, 138.9, 141.5, 142.2, 143.1, 143.8, 149.9, 150.6.

MS (GC, 70 eV): *m/z* (%) = 286 (M<sup>+</sup>, 100), 271 (16).

HRMS (ESI): calcd for C<sub>18</sub>H<sub>15</sub>N<sub>4</sub> (M+H) 287.12912, found 287.12936.

IR (ATR, cm<sup>-1</sup>):  $\tilde{\nu}$  = 3343 (w), 2451 (m), 2072 (w), 1591 (m), 1556 (m), 1486 (m), 1395 (m), 1360 (m), 1283 (w), 1199 (m), 1161 (m), 1113 (w), 1085 (w), 1013 (w), 910 (w), 833 (w), 803 (m), 775 (m), 754 (s), 708 (m), 681 (m), 669 (s), 630 (s).

### 3-Methyl-1-phenyl-6-(pyridin-4-yl)-1H-pyrazolo[3,4-b]pyridine (28d)

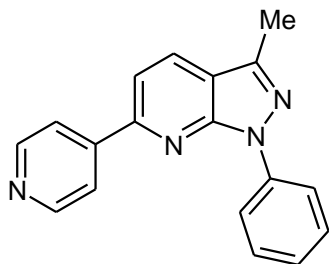

Yellow solid, mp 123–125 °C (*i*-PrOH).

<sup>1</sup>H NMR (300 MHz, CF<sub>3</sub>COOD/DMSO-*d*<sub>6</sub>): δ = 1.42 (s, 3H, Me), 6.10–6.22 (m, 3H), 6.49–6.51 (m, 2H), 6.75 (d, 1H, <sup>3</sup>*J* = 8.1 Hz), 7.18 (d, 1H, <sup>3</sup>*J* = 8.1 Hz), 7.36–7.38 (m, 2H), 7.59 (m, 1H).

<sup>13</sup>C NMR (62.9 MHz, DMSO-*d*<sub>6</sub>): δ = 13.3, 119.8, 120.9, 127.1, 128.6, 132.4, 133.0, 137.5, 138.7, 145.1, 148.0, 152.8, 156.8, 158.9.

MS (GC, 70 eV):  $m/z$  (%) = 286 ( $M^+$ , 100), 271 (18).

HRMS (ESI): calcd for  $C_{18}H_{15}N_4$  ( $M+H$ ) 287.2256, found 287.2255.

IR (ATR,  $cm^{-1}$ ):  $\tilde{\nu}$  = 2317 (w), 2064 (w), 1630 (m), 1588 (m), 1498 (m), 1445 (m), 1324 (w), 1247 (m), 1164 (m), 1097 (m), 1082 (m), 997 (m), 833 (m), 803 (s), 763 (s), 692 (m), 661 (m), 594 (m).

### 5-(3-(Trifluoromethyl)phenyl)-2-(piperidin-1-yl)thiazolo[4,5-*b*]pyridine (29a)

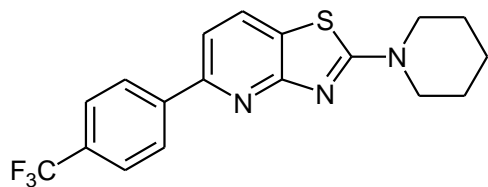

Yellow solid, mp 187–188 °C (EE: heptane/5:1).

$^1H$  NMR (300 MHz,  $DMSO-d_6$ ):  $\delta$  = 1.66 (s, 6H,  $CH_2$ ), 3.65 (s, 4H,  $CH_2$ ), 7.71 (d, 1H,  $^3J$  = 8.2 Hz), 7.83 (d, 2H,  $^3J$  = 8.2 Hz), 8.26-8.33 (m, 3H).

$^{19}F$  NMR (282 MHz,  $DMSO-d_6$ ):  $\delta$  = -60.9.

$^{13}C$  NMR (62.9 MHz,  $DMSO-d_6$ ):  $\delta$  = 23.6, 24.9, 48.9, 109.0, 110.3, 113.3, 120.3 (q,  $^3J$  = 230 Hz,  $CF_3$ ), 124.6, 125.5, 127.1, 128.7 (q,  $^3J$  = 31 Hz,  $CCF_3$ ), 130.4, 142.8, 151.4, 164.4, 169.7.

MS (GC, 70 eV):  $m/z$  (%) = 363 ( $M^+$ , 100), 334 (55), 230 (18), 307 (47), 295 (24).

HRMS (EI): calcd for  $C_{18}H_{16}F_3N_3S$  ( $M^+$ ) 363.4115, found 363.4116.

IR (ATR,  $cm^{-1}$ ):  $\tilde{\nu}$  = 2944 (w), 1614 (w), 1582 (w), 1559 (w), 1531 (m), 1444 (w), 1396 (w), 1322 (m), 1263 (m), 1217 (w), 1153 (m), 1105 (s), 1063 (m), 1008 (m), 909 (w), 882 (w), 837 (m), 812 (s), 769 (m), 738 (m), 703 (w).

### 5-(4-Methoxyphenyl)-2-(piperidin-1-yl)thiazolo[4,5-*b*]pyridine (29b)

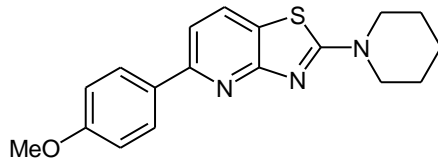

Brown solid, mp 173–175 °C (EE: heptane/5:1).

$^1\text{H}$  NMR (300 MHz, DMSO- $d_6$ ):  $\delta$  = 1.66 (s, 6H, CH<sub>2</sub>), 3.64 (s, 4H, CH<sub>2</sub>), 3.81 (s, 3H, OMe), 7.01–7.04 (m, 2H), 7.54 (d, 1H,  $^3J$  = 8.1 Hz), 8.02–8.05 (m, 2H), 8.16 (d, 1H,  $^3J$  = 8.1 Hz).

$^{13}\text{C}$  NMR (62.9 MHz, CDCl<sub>3</sub>):  $\delta$  = 23.6, 24.9, 48.9, 55.2, 112.0, 114.0, 122.3, 127.7, 130.1, 131.4, 145.6, 153.0, 159.9, 164.1, 169.5, 190.8.

MS (GC, 70 eV):  $m/z$  (%) = 325 (M<sup>+</sup>, 100), 296 (28), 289 (16), 282 (15), 269 (31), 242 (19).

HRMS (EI): calcd for C<sub>18</sub>H<sub>19</sub>N<sub>3</sub>OS (M<sup>+</sup>) 325.12433, found 325.124003.

IR (ATR, cm<sup>-1</sup>):  $\tilde{\nu}$  = 2934 (w), 1597 (m), 1537 (m), 1507 (m), 1446 (m), 1393 (m), 1359 (m), 1337 (m), 1284 (m), 1245 (s), 1208 (m), 1176 (m), 1136 (m), 1028 (m), 1005 (m), 956 (m), 881 (m), 840 (m), 822 (m), 803 (s), 767 (m), 729 (m), 700 (m), 665 (m), 613 (m).

44

### 7-(3-(Trifluoromethyl)phenyl)-1,3-dimethylpyrido[2,3-*d*]pyrimidine-2,4(1*H*,3*H*)-dione (30a)

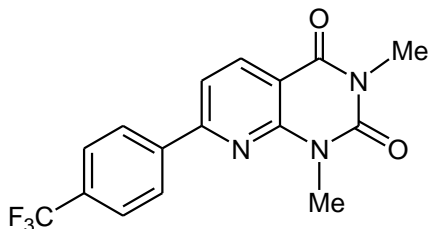

Yellow solid, mp 173–175 °C (EE: *i*-PrOH/1:1).

$^1\text{H}$  NMR (300 MHz, DMSO- $d_6$ ):  $\delta$  = 3.32 (s, 3H, Me), 3.66 (s, 3H, Me), 7.85 (d, 2H,  $^3J$  = 8.3 Hz), 7.93 (d, 1H,  $^3J$  = 8.3 Hz), 8.36 (d, 2H,  $^3J$  = 8.0 Hz), 8.43 (d, 1H,  $^3J$  = 8.5 Hz).

$^{19}\text{F}$  NMR (282 MHz, DMSO- $d_6$ ):  $\delta$  = -61.4.

$^{13}\text{C}$  NMR (62.9 MHz, DMSO- $d_6$ ):  $\delta$  = 28.1, 29.1, 109.8, 115.7, 116.0, 117.2 (q,  $^1J$  = 289 Hz, CF<sub>3</sub>), 121.9, 125.9, 126.2, 128.1, 129.6, 138.4, 140.8, 150.7 (q,  $^2J$  = 34 Hz, CCF<sub>3</sub>), 157.8, 160.5.

MS (GC, 70 eV):  $m/z$  (%) = 335 (M<sup>+</sup>, 100), 307 (43), 223 (53).

HRMS (ESI): calcd for C<sub>16</sub>H<sub>13</sub>F<sub>3</sub>N<sub>3</sub>O<sub>2</sub> (M+1) 336.09544, found 336.09613.

IR (ATR, cm<sup>-1</sup>):  $\tilde{\nu}$  = 3362 (m), 2964 (m), 2766 (m), 2457 (w), 1709 (m), 1657 (s), 1595 (s), 1574 (m), 1470 (m), 1424 (m), 1314 (s), 1289 (m), 1170 (m), 1154 (m), 1112 (s), 1072 (s), 1001 (m), 889 (w), 835 (m), 791 (s), 744 (m), 705 (w), 664 (w), 589 (w).

### 6-(3-(Trifluoromethyl)phenyl)-4-mercaptopyrido[3,2-*d*]pyrimidin-2-ol (30b)



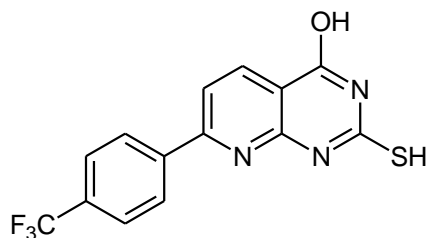

Green solid, mp 172–174 °C (EE: *i*-PrOH/3:1).

$^1\text{H}$  NMR (300 MHz, DMSO- $d_6$ ):  $\delta$  = 7.92–7.98 (m, 2H), 8.03 (d, 1H,  $^3J$  = 8.0 Hz), 8.37–8.41 (m, 3H), 12.64 (s, 1H, OH), 13.22 (s, 1H, SH).

$^{13}\text{C}$  NMR (62.9 MHz, DMSO- $d_6$ ):  $\delta$  = 111.5, 117.4, 124.1 (q,  $^3J$  = 272 Hz, CF $_3$ ), 125.8, 125.9, 128.1, 130.5 (q,  $^3J$  = 32 Hz, CCF $_3$ ), 137.7, 140.5, 151.5, 159.0, 159.4, 162.3, 176.1.

MS (GC, 70 eV):  $m/z$  (%) = 323 (M $^+$ , 100), 280 (18), 265 (13), 236 (12).

HRMS (ESI): calcd for C $_{14}$ H $_9$ FN $_3$ OS (M+1) 324.04129, found 324.04038.

IR (ATR, cm $^{-1}$ ):  $\tilde{\nu}$  = 2938 (w), 2762 (s), 2457 (w), 1682 (m), 1611 (s), 1574 (m), 1476 (m), 1412 (m), 1322 (s), 1276 (m), 1238 (m), 1159 (s), 1110 (s), 1070 (s), 1027 (m), 887 (w), 831 (s), 791 (s), 762 (m), 654 (w).

### 7-(4-Methoxyphenyl)-1-methylpyrido[2,3-*d*]pyrimidine-2,4(1*H*,3*H*)-dione (30c)

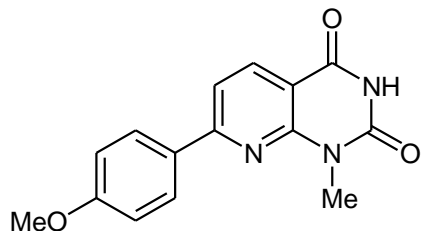

Yellow solid, mp 236–238 °C (EE: *i*-PrOH/1:3).

$^1\text{H}$  NMR (300 MHz, DMSO- $d_6$ ):  $\delta$  = 3.58 (s, 3H, Me), 3.86 (s, 3H, OMe), 7.09 (d, 2H,  $^3J$  = 9.0 Hz), 7.80 (d, 1H,  $^3J$  = 8.0 Hz), 8.18 (d, 2H,  $^3J$  = 9.0 Hz), 8.29 (d, 1H,  $^3J$  = 8.0 Hz), 11.64 (s, 1H, NH).

$^{13}\text{C}$  NMR (62.9 MHz, DMSO- $d_6$ ):  $\delta$  = 28.0, 55.3, 108.8, 113.9, 114.3, 128.9, 129.4, 137.4, 150.8, 151.7, 159.5, 161.1, 161.4.

MS (EI, 70 eV):  $m/z$  (%) = 283 (M $^+$ , 100), 254 (34), 185 (26), 170 (13).

HRMS (EI): calcd for C $_{15}$ H $_{13}$ N $_3$ O $_3$  (M $^+$ ) 283.2865, found 283.2866.

IR (ATR,  $\text{cm}^{-1}$ ):  $\tilde{\nu} = 3167$  (w), 3036 (w), 2835 (w), 1692 (s), 1585 (s), 1521 (m), 1454 (m), 1404 (s), 1338 (m), 1299 (m), 1251 (s), 1205 (m), 1177 (m), 1080 (m), 1020 (m), 974 (w), 860 (m), 833 (m), 790 (s), 749 (m), 694 (m), 636 (s).

**1,3-Dimethyl-7-(pyridin-3-yl)pyrido[2,3-*d*]pyrimidine-2,4(1*H*,3*H*)-dione (30d)**

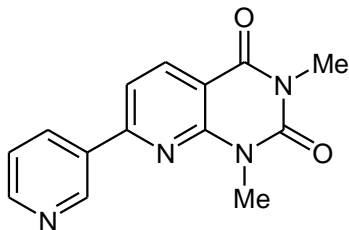

Yellow solid, mp 216 °C (*i*-PrOH).

$^1\text{H}$  NMR (300 MHz,  $\text{DMSO-}d_6$ ):  $\delta = 3.32$  (s, 3H, Me), 3.68 (s, 3H, Me), 7.95–7.99 (m, 1H), 8.11 (d, 1H,  $^3J = 8.1$  Hz), 8.51 (d, 1H,  $^3J = 8.1$  Hz), 8.91 (dd, 1H,  $^3J = 5.3$  Hz,  $^4J = 1.4$  Hz), 9.03 (d, 1H,  $^3J = 8.3$  Hz,  $^4J = 1.8$  Hz), 9.56 (d, 1H,  $^3J = 1.8$  Hz).

$^{13}\text{C}$  NMR (75.5 MHz,  $\text{DMSO-}d_6$ ):  $\delta = 28.1, 29.2, 110.3, 115.8, 125.8, 134.2, 138.6, 139.3, 144.6, 146.9, 150.6, 151.0, 155.6, 160.5$ .

MS (EI, 70 eV):  $m/z$  (%) = 268 ( $\text{M}^+$ , 100).

HRMS (EI): calcd for  $\text{C}_{14}\text{H}_{12}\text{N}_4\text{O}_2$  ( $\text{M}^+$ ) 268.1022, found 268.10233.

IR (ATR,  $\text{cm}^{-1}$ ):  $\tilde{\nu} = 3043$  (w), 2351 (w), 2109 (w), 1996 (w), 1705 (m), 1651 (s), 1594 (s), 1553 (m), 1478 (m), 1423 (s), 1373 (m), 1346 (s), 1291 (s), 1226 (m), 1101 (m), 1062 (m), 937 (w), 869 (w), 829 (m), 791 (s), 748 (s), 685 (s), 622 (s).

**(C) Copies of  $^1\text{H}$  and  $^{13}\text{C}$  NMR spectra.**

Gevorgyan AG132 (1) 1H DMSO

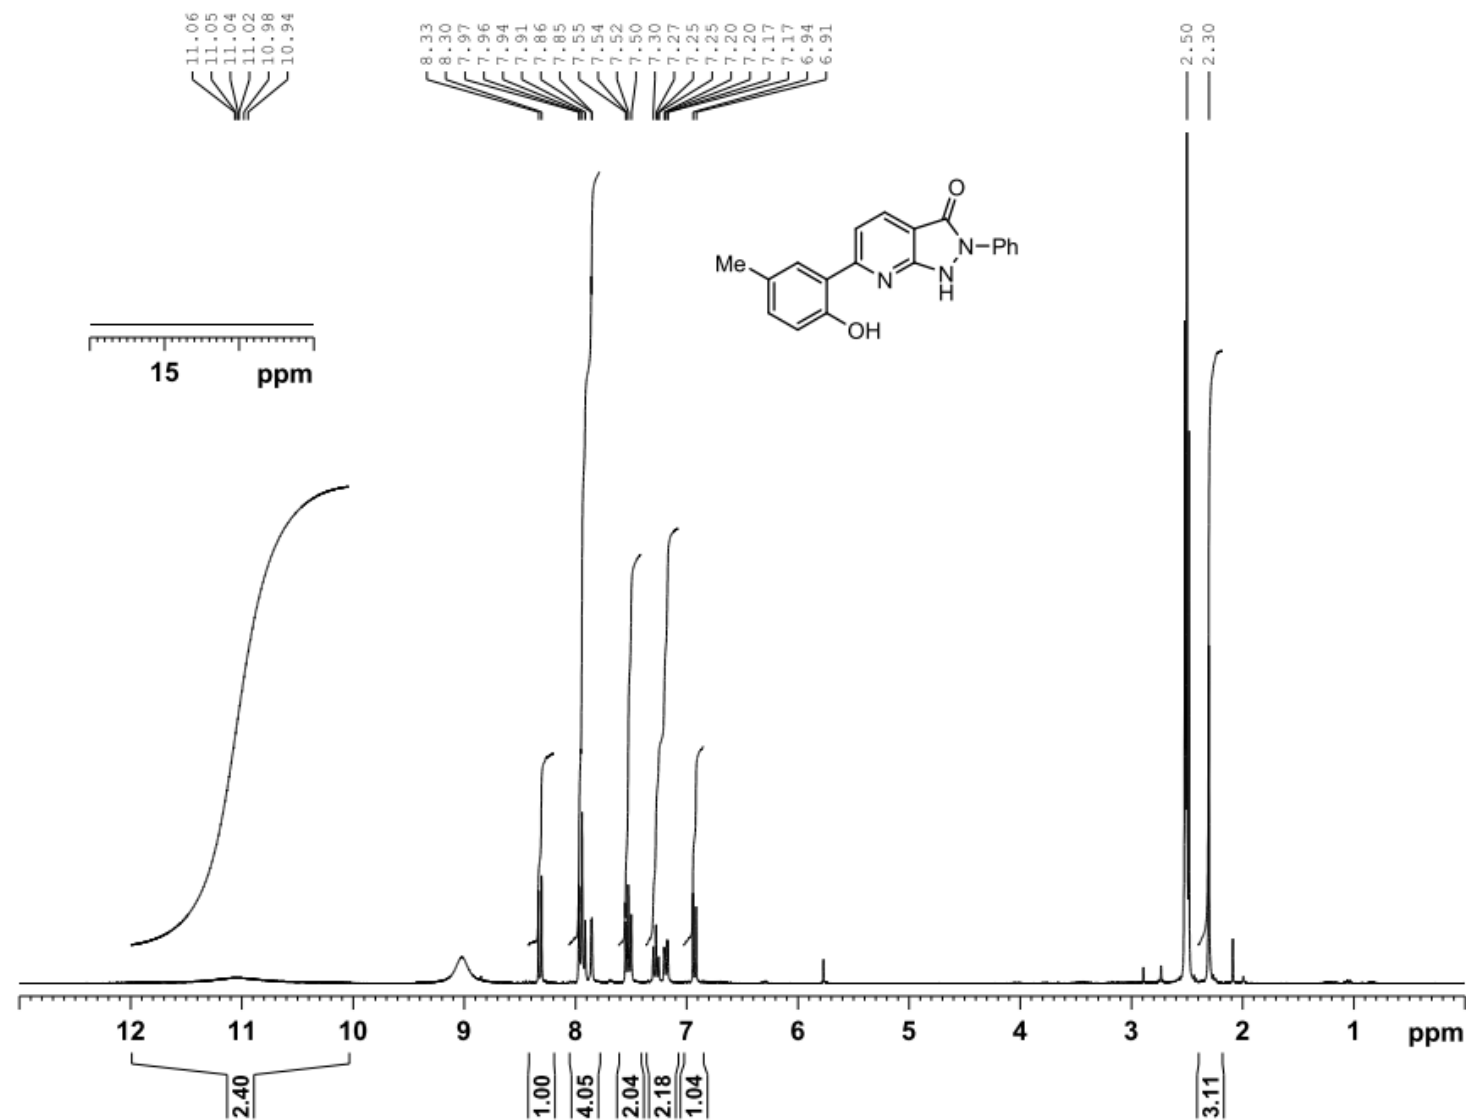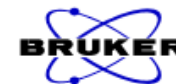

Current Data Parameters  
NAME 110105.u308 ag 132-1  
EXPNO 10  
PROCNO 1

F2 - Acquisition Parameters  
Date\_ 20110105  
Time 8.56  
INSTRUM spect  
PROBHD 5 mm PABBO BB-  
PULPROG zg30  
TD 65536  
SOLVENT DMSO  
NS 16  
DS 2  
SWH 6188.119 Hz  
FIDRES 0.094423 Hz  
AQ 5.2953567 sec  
RG 101  
DW 80.800 usec  
DE 10.00 usec  
TE 298.2 K  
D1 1.00000000 sec  
TD0 1

===== CHANNEL f1 =====  
NUC1 1H  
P1 10.00 usec  
PL1 0.00 dB  
PL1W 11.25325108 W  
SFO1 300.1318534 MHz

F2 - Processing parameters  
SI 32768  
SF 300.1300022 MHz  
WDW EM  
SSB 0  
LB 0.30 Hz  
GB 0  
PC 1.00

Gevorgyan AG132 (1) 13C DMSO

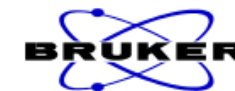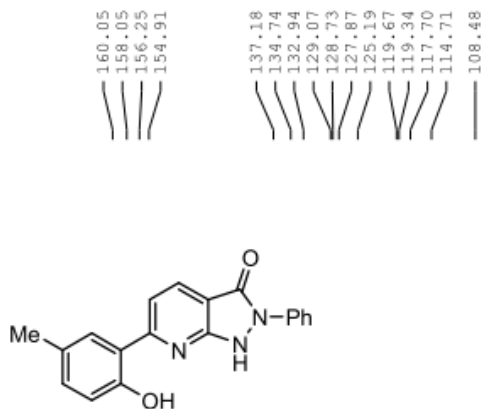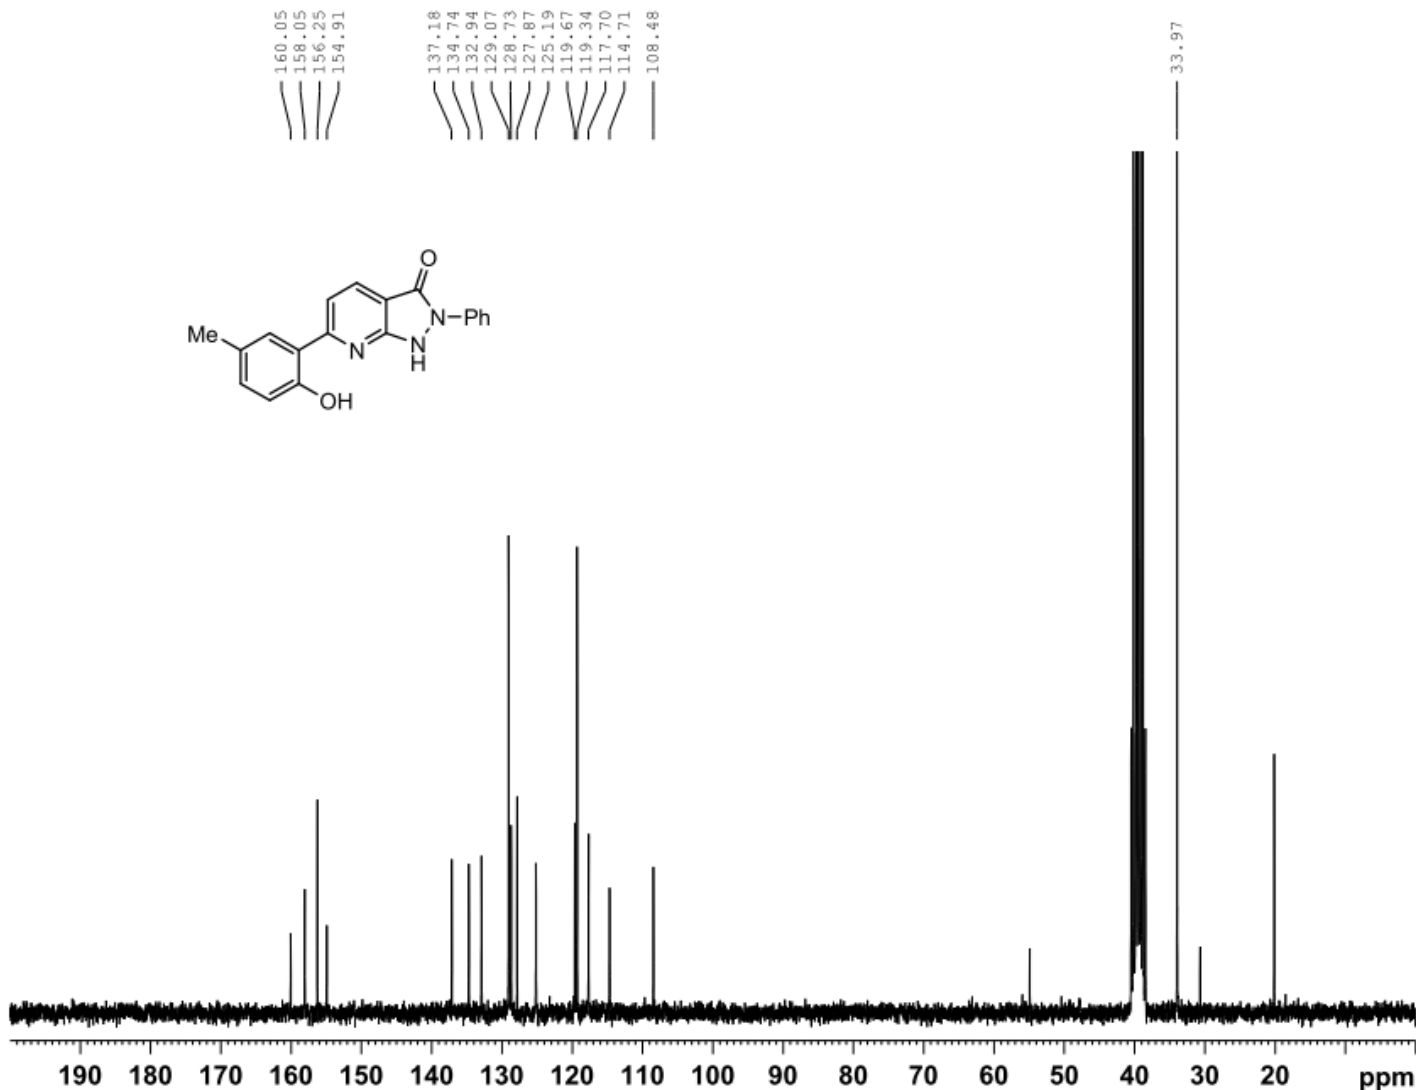

Current Data Parameters  
NAME 110106.202 ag 132 C  
EXPNO 10  
PROCNO 1

F2 - Acquisition Parameters  
Date\_ 20110106  
Time 13.01  
INSTRUM spect  
PROBHD 5 mm PABBO BB-  
PULPROG zgpg30  
TD 65536  
SOLVENT DMSO  
NS 1024  
DS 4  
SWH 15000.000 Hz  
FIDRES 0.228882 Hz  
AQ 2.1845834 sec  
RG 2050  
DW 33.333 usec  
DE 10.00 usec  
TE 297.8 K  
D1 2.0000000 sec  
d11 0.0300000 sec  
DELTA 1.89999998 sec  
TD0 1

===== CHANNEL f1 =====  
NUC1 13C  
P1 10.00 usec  
PL1 -1.00 dB  
SFO1 62.9015280 MHz

===== CHANNEL f2 =====  
CPDPRG2 waltz16  
NUC2 1H  
PCPD2 70.00 usec  
PL12 15.00 dB  
PL13 15.00 dB  
PL2 -2.50 dB  
SFO2 250.1310005 MHz

F2 - Processing parameters  
SI 32768  
SF 62.8952678 MHz  
WDW EM  
SSB 0  
LB 1.00 Hz  
GB 0  
PC 1.40

Gevorgyan AG145 1H DMSO

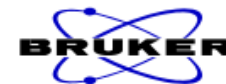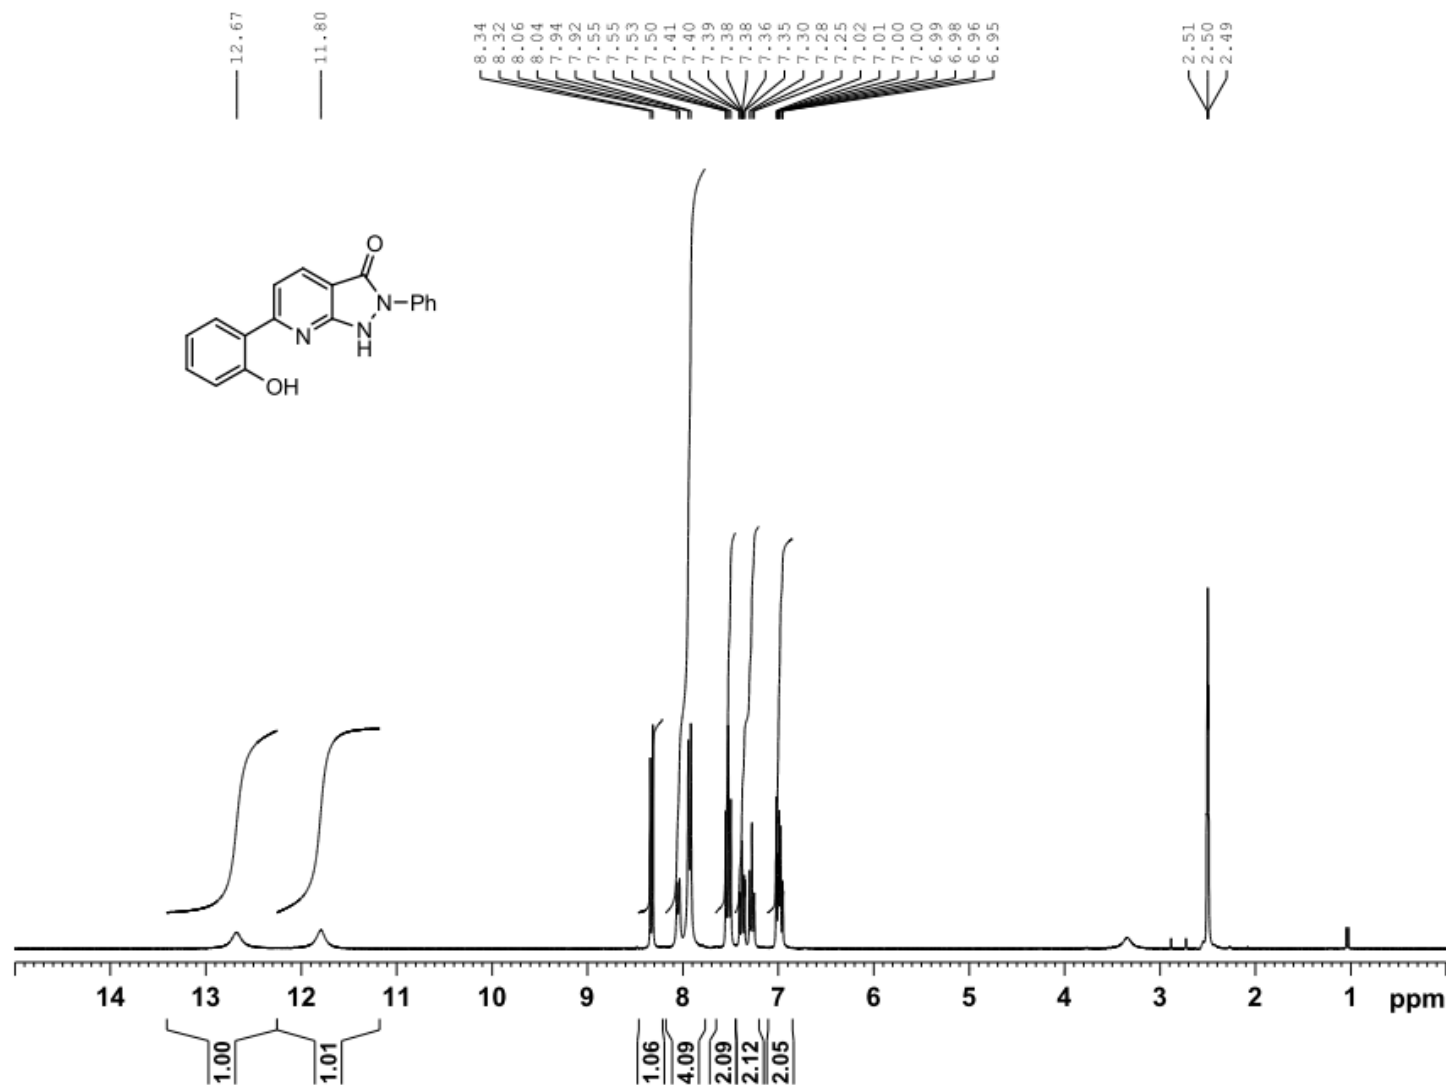

Current Data Parameters  
 NAME 110111.u305 ag 145  
 EXPNO 10  
 PROCNO 1

F2 - Acquisition Parameters  
 Date\_ 20110111  
 Time 8.25  
 INSTRUM spect  
 PROBHD 5 mm PABBO BB-  
 PULPROG zg30  
 TD 65536  
 SOLVENT DMSO  
 NS 16  
 DS 2  
 SWH 6188.119 Hz  
 FIDRES 0.094423 Hz  
 AQ 5.2953587 sec  
 RG 144  
 DW 80.800 usec  
 DE 10.00 usec  
 TE 298.2 K  
 D1 1.00000000 sec  
 TD0 1

===== CHANNEL f1 =====  
 NUC1 1H  
 P1 10.00 usec  
 PL1 0.00 dB  
 PL1W 11.25325108 W  
 SFO1 300.1318534 MHz

F2 - Processing parameters  
 SI 32768  
 SF 300.1300062 MHz  
 WDW EM  
 SSB 0  
 LB 0.30 Hz  
 GB 0  
 PC 1.00

Gevorgyan, AG 145, DMSO, 13C

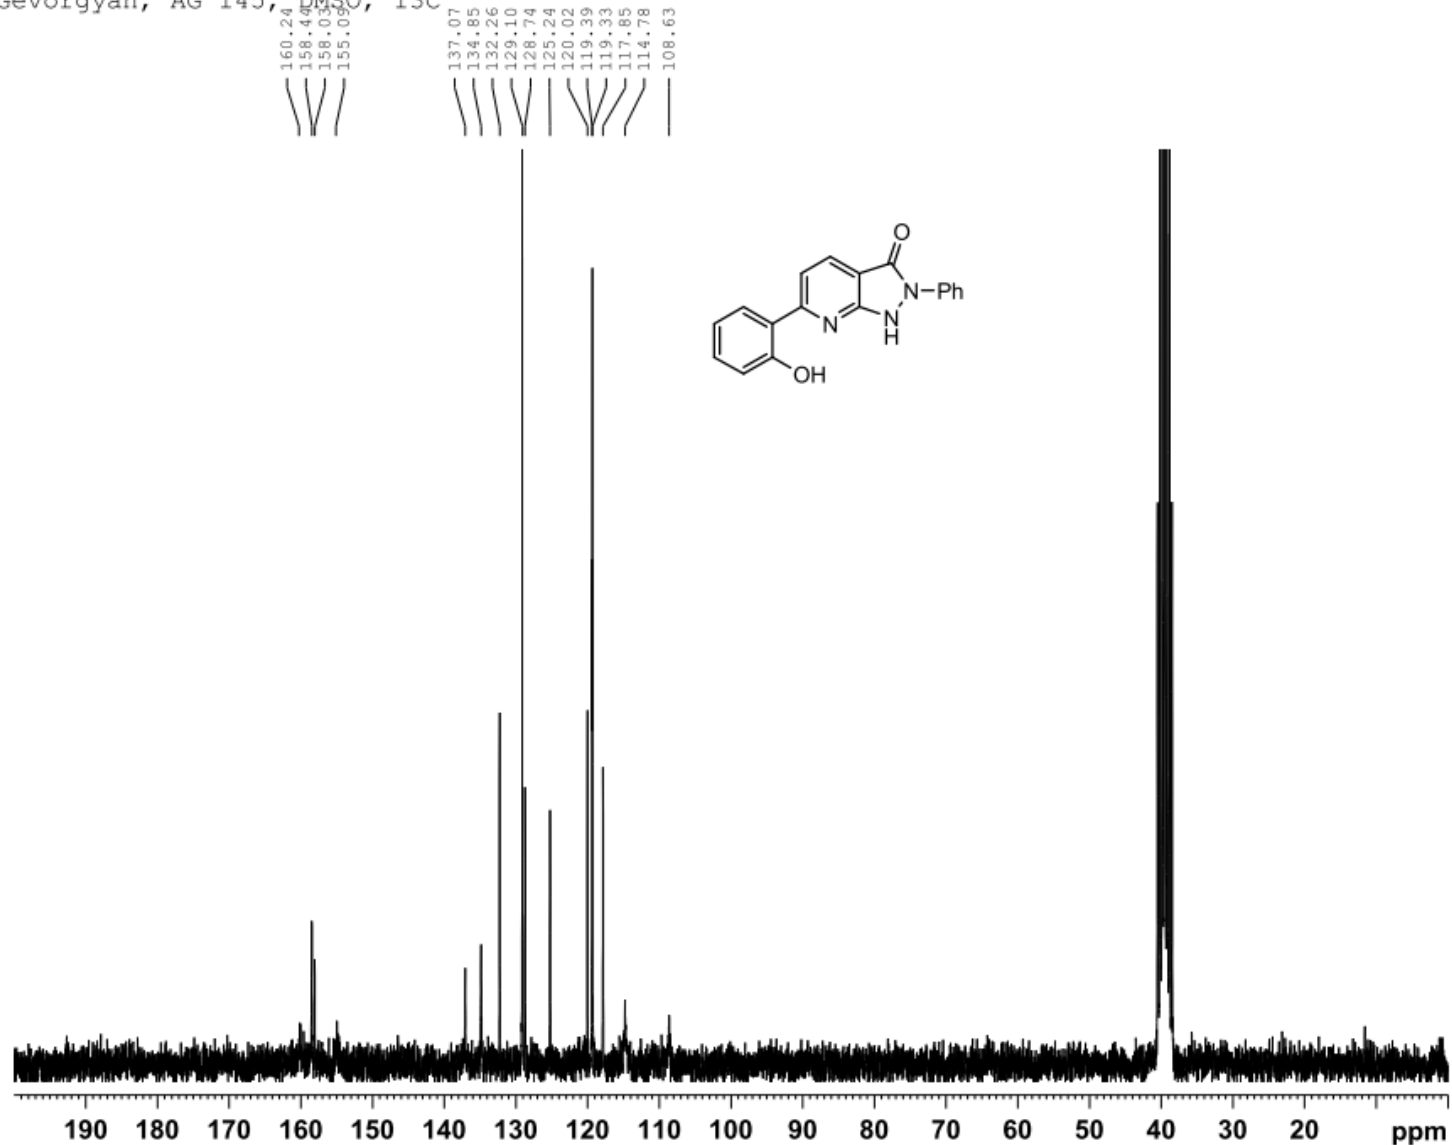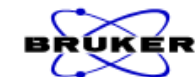

Current Data Parameters  
NAME 110114.205 ag 145 C  
EXPNO 10  
PROCNO 1

F2 - Acquisition Parameters  
Date\_ 20110115  
Time 3.27  
INSTRUM spect  
PROBHD 5 mm PABBO BB-  
PULPROG zgpg30  
TD 65536  
SOLVENT DMSO  
NS 1024  
DS 4  
SWH 15000.000 Hz  
FIDRES 0.228882 Hz  
AQ 2.1845834 sec  
RG 2050  
DW 33.333 usec  
DE 10.00 usec  
TE 297.9 K  
D1 2.0000000 sec  
d11 0.03000000 sec  
DELTA 1.8999998 sec  
TD0 1

===== CHANNEL f1 =====  
NUC1 13C  
P1 10.00 usec  
PL1 -1.00 dB  
SFO1 62.9015280 MHz

===== CHANNEL f2 =====  
CPDPRG2 waltz16  
NUC2 1H  
PCPD2 70.00 usec  
PL12 15.00 dB  
PL13 15.00 dB  
PL2 -2.50 dB  
SFO2 250.1310005 MHz

F2 - Processing parameters  
SI 32768  
SF 62.8952692 MHz  
WDW EM  
SSB 0  
LB 1.00 Hz  
GB 0  
PC 1.40

Gevorgyan AG124 (1) 1H DMSO

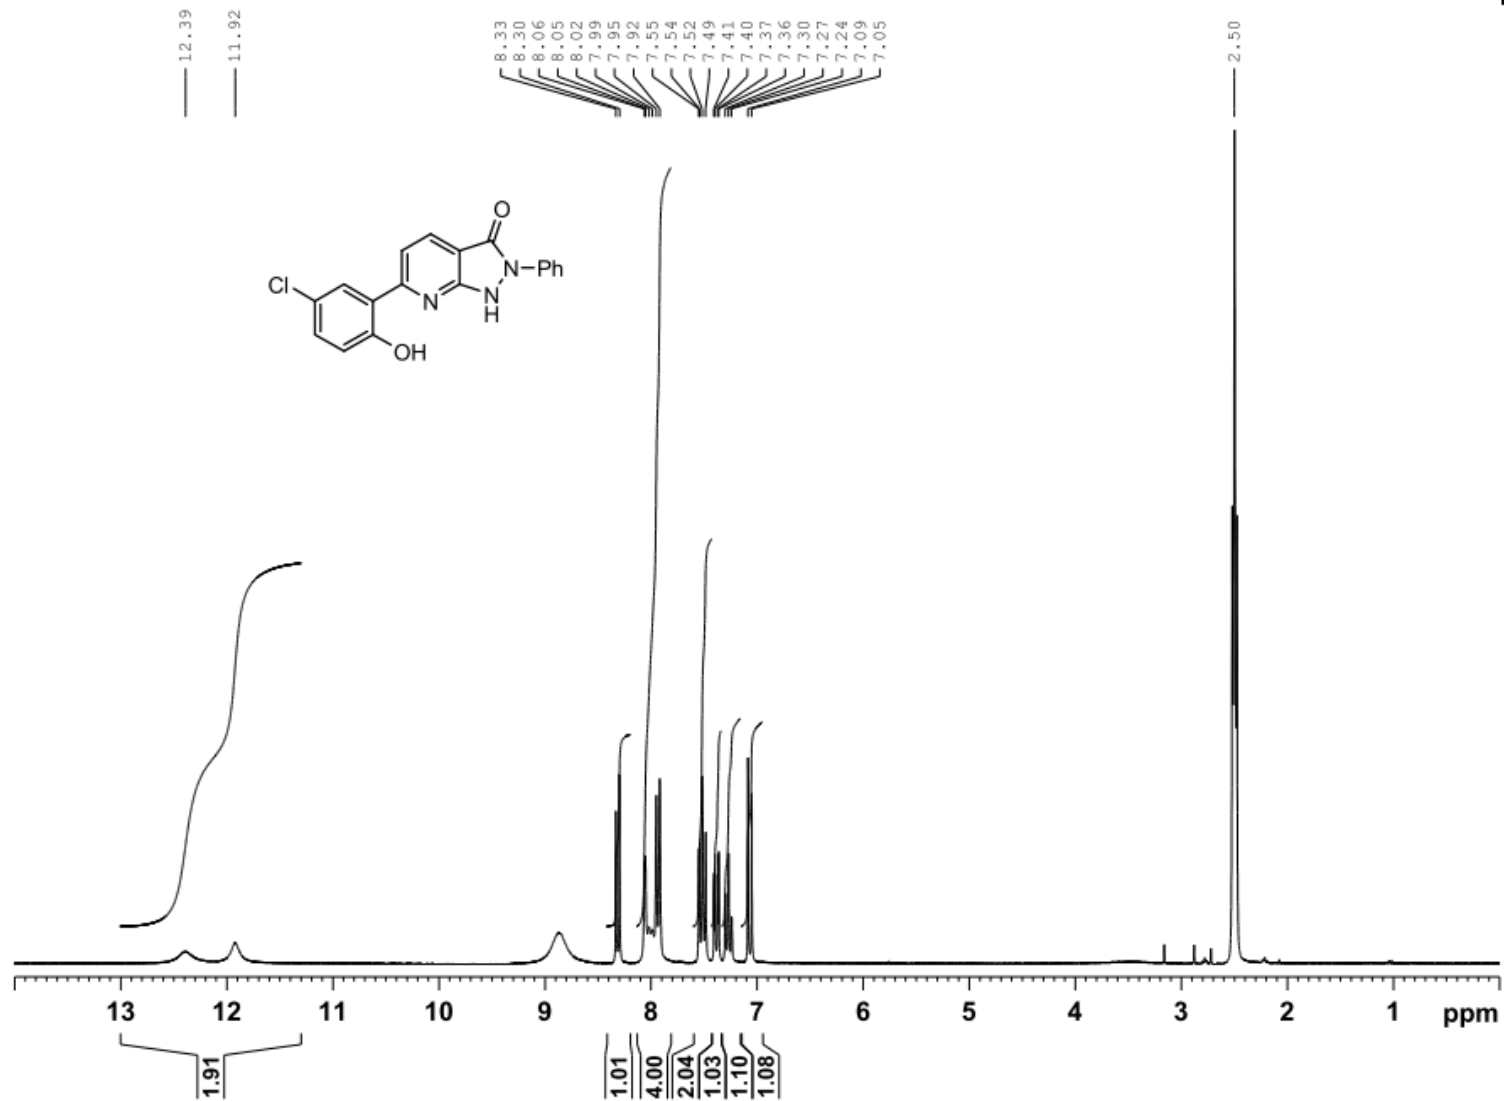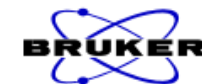

Current Data Parameters  
NAME 101220.202 ag 124  
EXPNO 10  
PROCNO 1

F2 - Acquisition Parameters  
Date\_ 20101220  
Time 10.12  
INSTRUM spect  
PROBHD 5 mm PABBO BB-  
PULPROG zg30  
TD 65536  
SOLVENT DMSO  
NS 16  
DS 2  
SWH 5165.289 Hz  
FIDRES 0.078816 Hz  
AQ 6.3439350 sec  
RG 456  
DW 96.800 usec  
DE 10.00 usec  
TE 294.9 K  
D1 1.00000000 sec  
TD0 1

===== CHANNEL f1 =====  
NUC1 1H  
P1 10.00 usec  
PL1 -2.50 dB  
SFO1 250.1315447 MHz

F2 - Processing parameters  
SI 32768  
SF 250.1299982 MHz  
WDW EM  
SSB 0  
LB 0.30 Hz  
GB 0  
PC 1.00

Gevorgyan AG124 (1) 13C DMSO

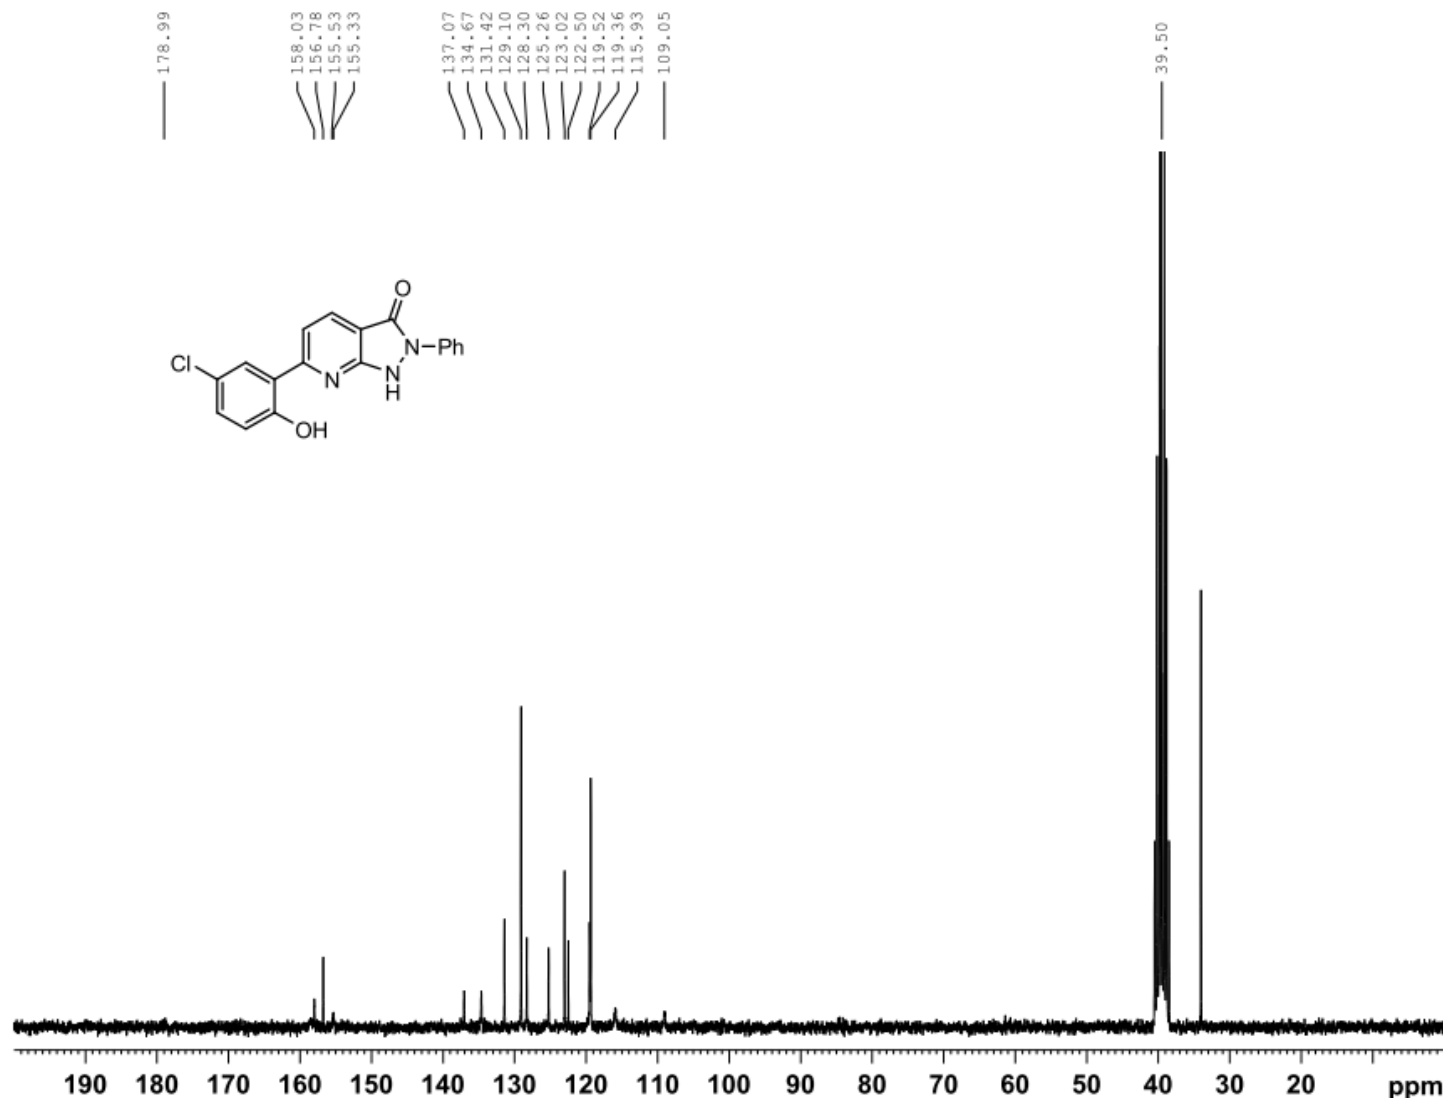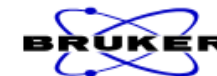

Current Data Parameters  
NAME 101220.202 ag 124  
EXPNO 11  
PROCNO 1

F2 - Acquisition Parameters  
Date\_ 20101220  
Time 18.12  
INSTRUM spect  
PROBHD 5 mm PABBO BB-  
PULPROG zgpg30  
TD 65536  
SOLVENT DMSO  
NS 1024  
DS 4  
SWH 15000.000 Hz  
FIDRES 0.228882 Hz  
AQ 2.1845834 sec  
RG 2050  
DW 33.333 usec  
DE 10.00 usec  
TE 295.9 K  
D1 2.0000000 sec  
d11 0.0300000 sec  
DELTA 1.89999998 sec  
TD0 1

=====  
CHANNEL f1  
=====  
NUC1 13C  
P1 10.00 usec  
PL1 -1.00 dB  
SFO1 62.9015280 MHz

=====  
CHANNEL f2  
=====  
CPDPRG2 waltz16  
NUC2 1H  
PCPD2 70.00 usec  
PL12 15.00 dB  
PL13 15.00 dB  
PL2 -2.50 dB  
SFO2 250.1310005 MHz

F2 - Processing parameters  
SI 32768  
SF 62.8952678 MHz  
WDW EM  
SSB 0  
LB 1.00 Hz  
GB 0  
PC 1.40



Gevorgyan AG198 1H DMSO

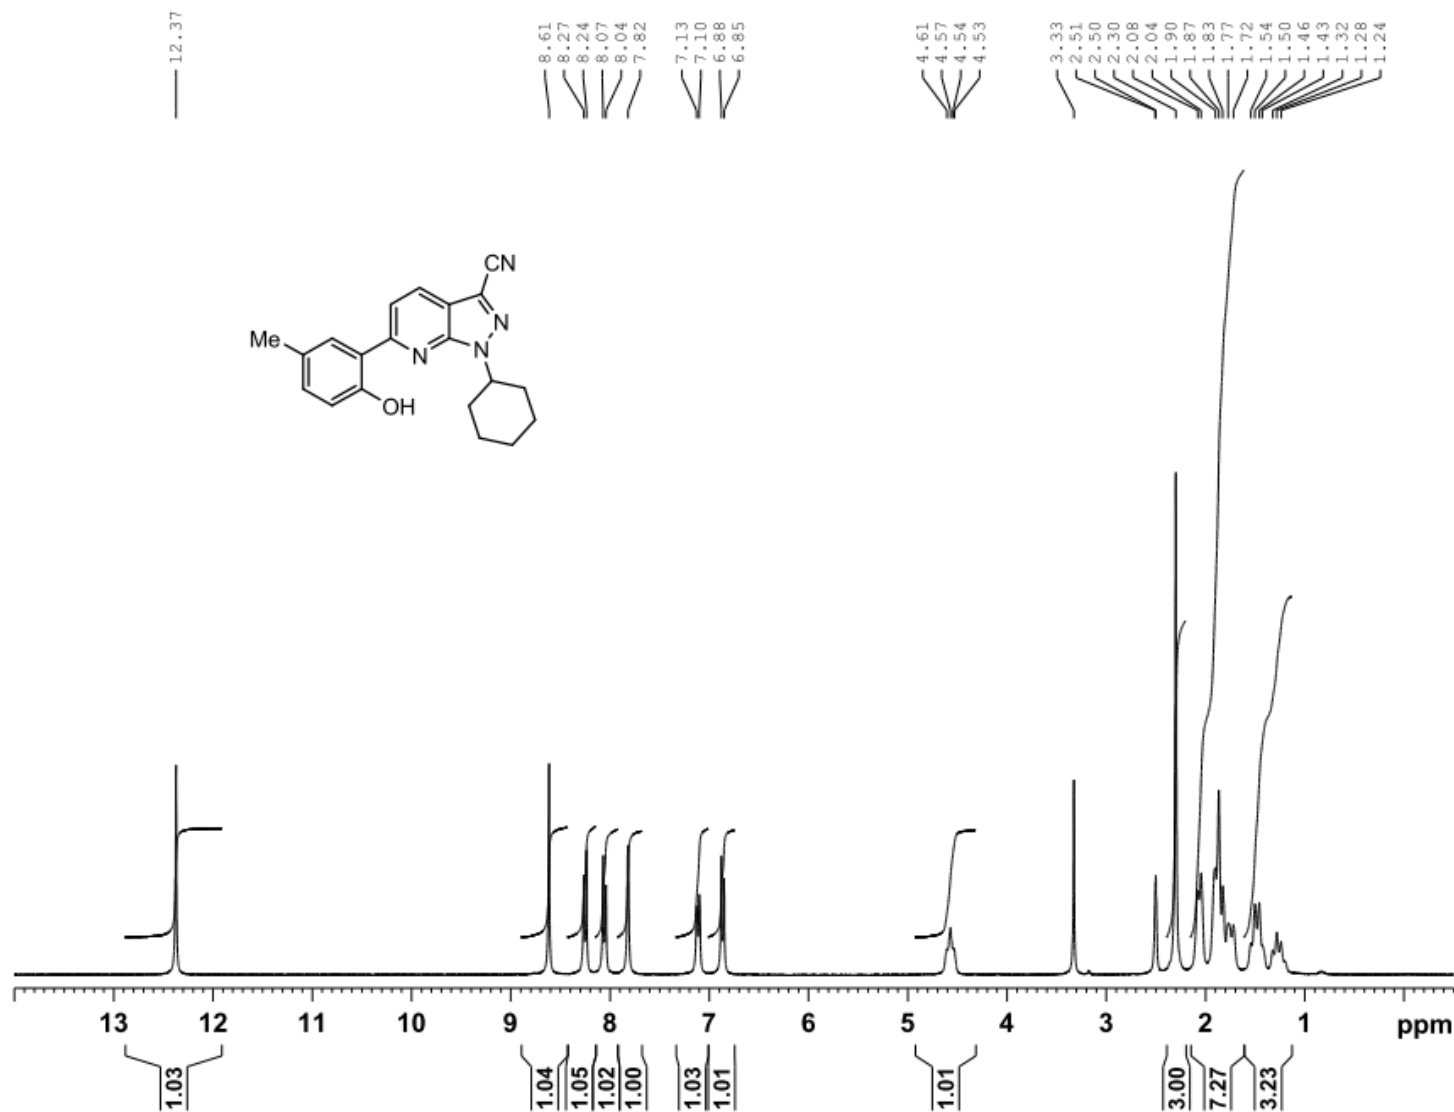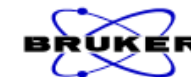

Current Data Parameters  
 NAME 110310.u320 ag 198  
 EXPNO 10  
 PROCNO 1

F2 - Acquisition Parameters  
 Date\_ 20110310  
 Time 10.57  
 INSTRUM spect  
 PROBHD 5 mm PABBO BB-  
 PULPROG zg30  
 TD 65536  
 SOLVENT DMSO  
 NS 16  
 DS 2  
 SWH 6188.119 Hz  
 FIDRES 0.094423 Hz  
 AQ 5.2953587 sec  
 RG 114  
 DW 80.800 usec  
 DE 10.00 usec  
 TE 298.2 K  
 D1 1.0000000 sec  
 TD0 1

===== CHANNEL f1 =====  
 NUC1 1H  
 P1 10.00 usec  
 PL1 0.00 dB  
 PL1W 11.25325108 W  
 SFO1 300.1318534 MHz

F2 - Processing parameters  
 SI 32768  
 SF 300.1300067 MHz  
 WDW EM  
 SSB 0  
 LB 0.30 Hz  
 GB 0  
 PC 1.00

Gevorgyan AG198 13C DMSO

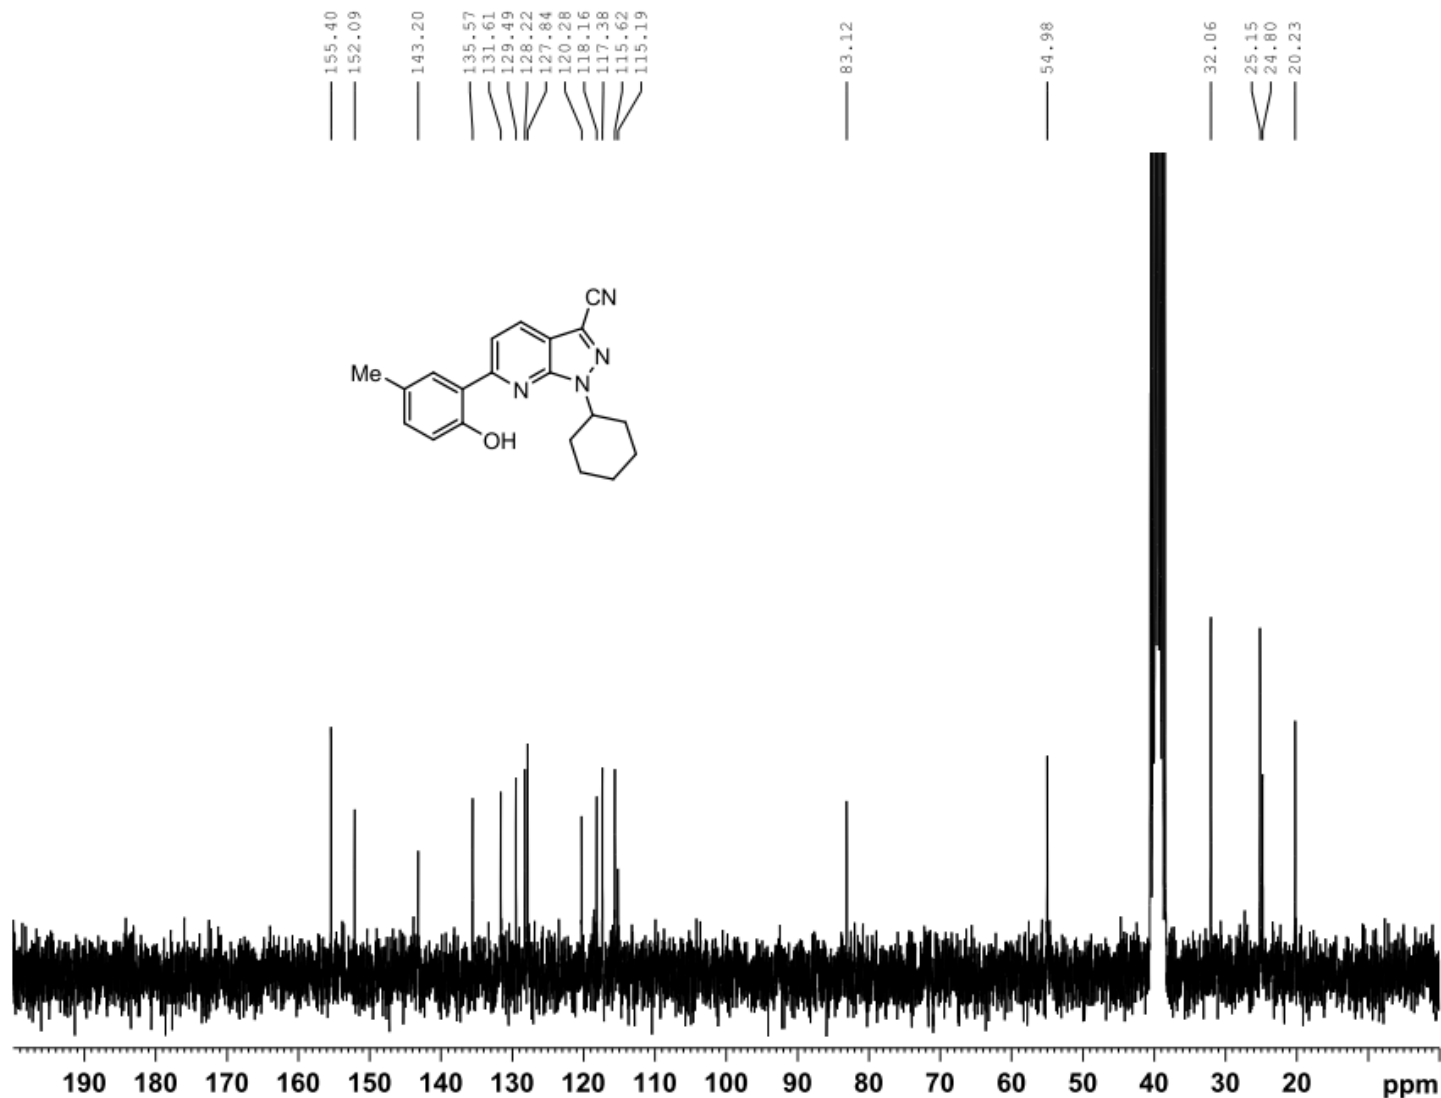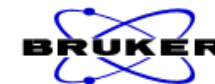

Current Data Parameters  
NAME 110311.219 ag 198 C  
EXPNO 10  
PROCNO 1

F2 - Acquisition Parameters  
Date\_ 20110312  
Time 14.03  
INSTRUM spect  
PROBHD 5 mm PABBO BB-  
PULPROG zgpg30  
TD 65536  
SOLVENT DMSO  
NS 1024  
DS 4  
SWH 15000.000 Hz  
FIDRES 0.228882 Hz  
AQ 2.1845834 sec  
RG 2050  
DW 33.333 usec  
DE 10.00 usec  
TE 297.9 K  
D1 2.0000000 sec  
d11 0.0300000 sec  
DELTA 1.89999998 sec  
TD0 1

===== CHANNEL f1 =====  
NUC1 13C  
P1 10.00 usec  
PL1 -1.00 dB  
SFO1 62.9015280 MHz

===== CHANNEL f2 =====  
CPDPRG2 waltz16  
NUC2 1H  
PCPD2 70.00 usec  
PL12 15.00 dB  
PL13 15.00 dB  
PL2 -2.50 dB  
SFO2 250.1310005 MHz

F2 - Processing parameters  
SI 32768  
SF 62.8952692 MHz  
WDW EM  
SSB 0  
LB 1.00 Hz  
GB 0  
PC 1.40

Gevorgyan AG152 1H CDC13

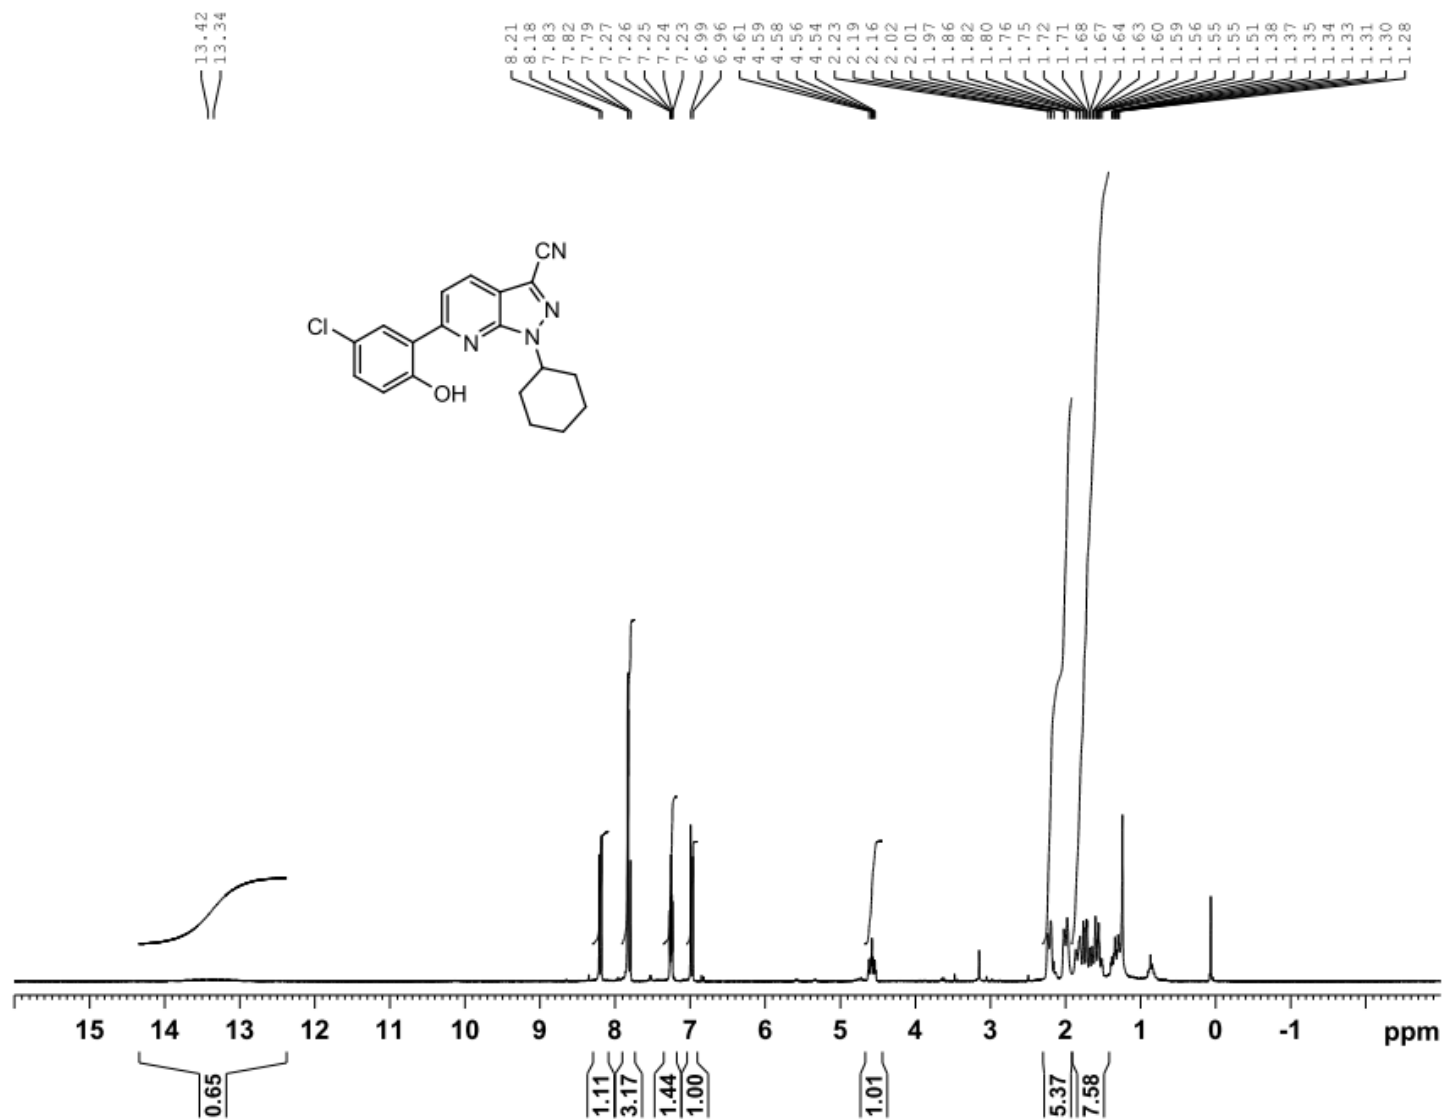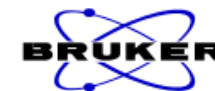

Current Data Parameters  
NAME 110124.u304 ag 152  
EXPNO 10  
PROCNO 1

F2 - Acquisition Parameters  
Date\_ 20110124  
Time 8.35  
INSTRUM spect  
PROBHD 5 mm PABBO BB-  
PULPROG zg30  
TD 65536  
SOLVENT CDC13  
NS 16  
DS 2  
SWH 6188.119 Hz  
FIDRES 0.094423 Hz  
AQ 5.2953587 sec  
RG 101  
DW 80.800 usec  
DE 10.00 usec  
TE 298.2 K  
D1 1.00000000 sec  
TD0 1

===== CHANNEL f1 =====  
NUC1 1H  
P1 10.00 usec  
PL1 0.00 dB  
PL1W 11.25325108 W  
SFO1 300.1318534 MHz

F2 - Processing parameters  
SI 32768  
SF 300.1300111 MHz  
WDW EM  
SSB 0  
LB 0.30 Hz  
GB 0  
PC 1.00

Gevorgyan AG152 (1) 13C CDC13

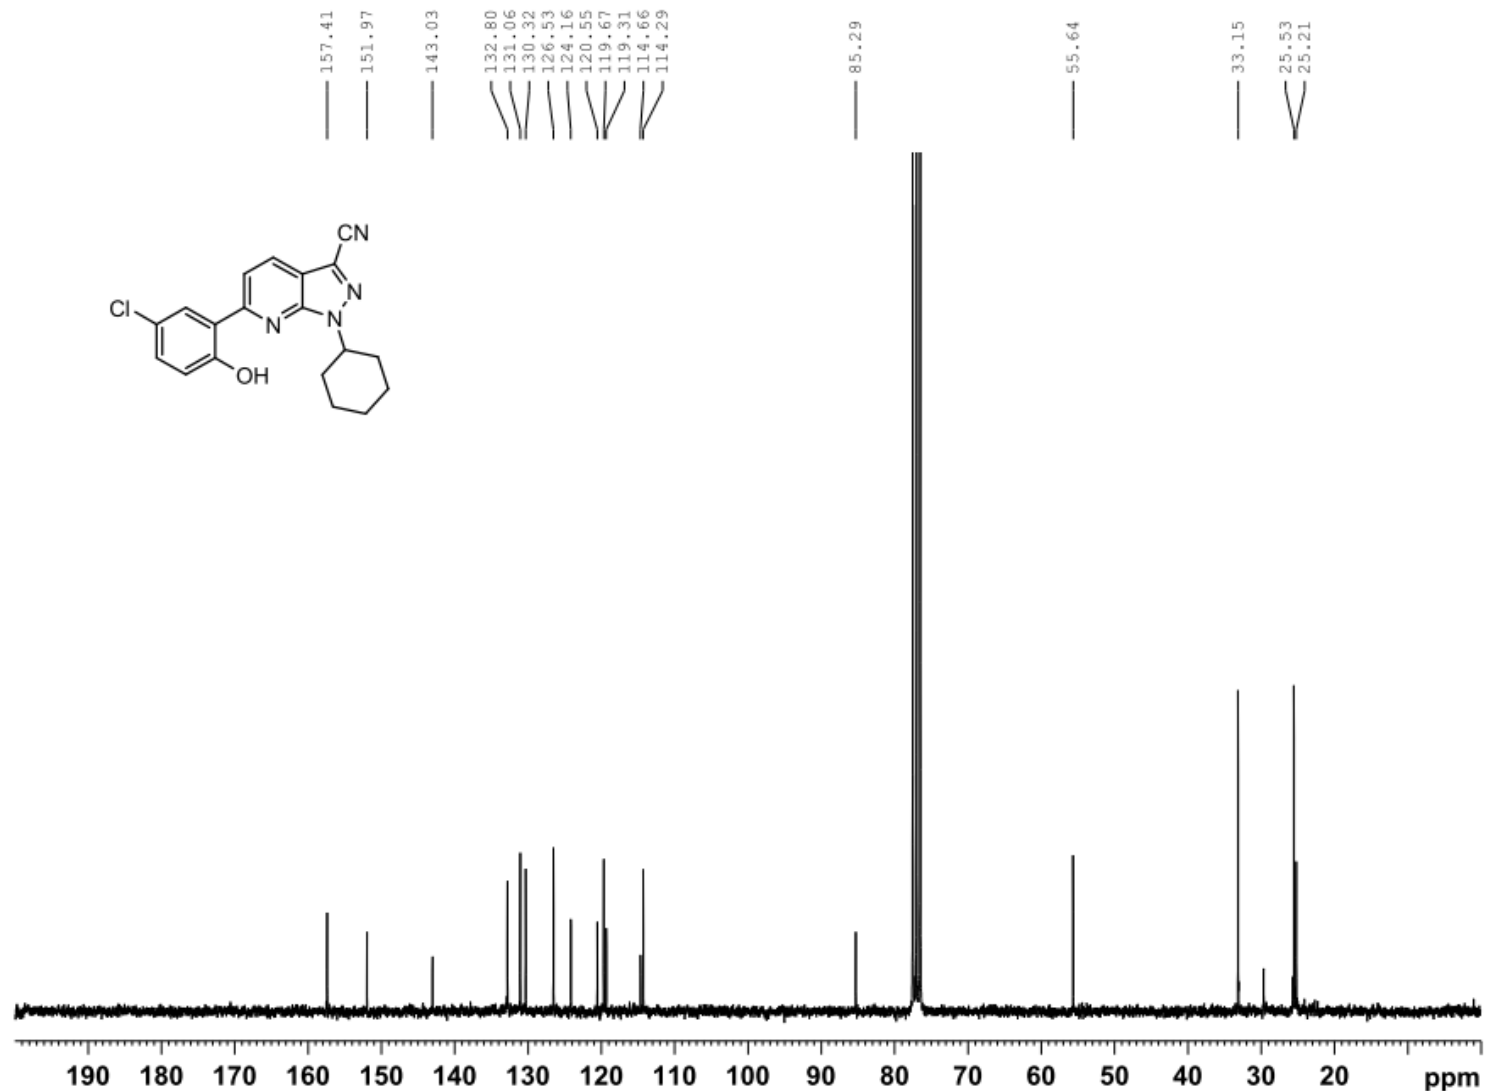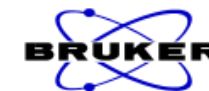

Current Data Parameters  
NAME 110203.216 ag 152 C  
EXPNO 10  
PROCNO 1

F2 - Acquisition Parameters  
Date\_ 20110204  
Time 8.42  
INSTRUM spect  
PROBHD 5 mm PABBO BB-  
PULPROG zgpg30  
TD 65536  
SOLVENT CDC13  
NS 1600  
DS 4  
SWH 15000.000 Hz  
FIDRES 0.228882 Hz  
AQ 2.1845834 sec  
RG 2050  
DW 33.333 usec  
DE 10.00 usec  
TE 297.9 K  
D1 2.00000000 sec  
d11 0.03000000 sec  
DELTA 1.89999998 sec  
TD0 1

===== CHANNEL f1 =====  
NUC1 13C  
P1 10.00 usec  
PL1 -1.00 dB  
SFO1 62.9015280 MHz

===== CHANNEL f2 =====  
CPDPRG2 waltz16  
NUC2 1H  
PCPD2 70.00 usec  
PL12 15.00 dB  
PL13 15.00 dB  
PL2 -2.50 dB  
SFO2 250.1310005 MHz

F2 - Processing parameters  
SI 32768  
SF 62.8952397 MHz  
WDW EM  
SSB 0  
LB 1.00 Hz  
GB 0  
PC 1.40

Gevorgyan AG140 1H DMSO

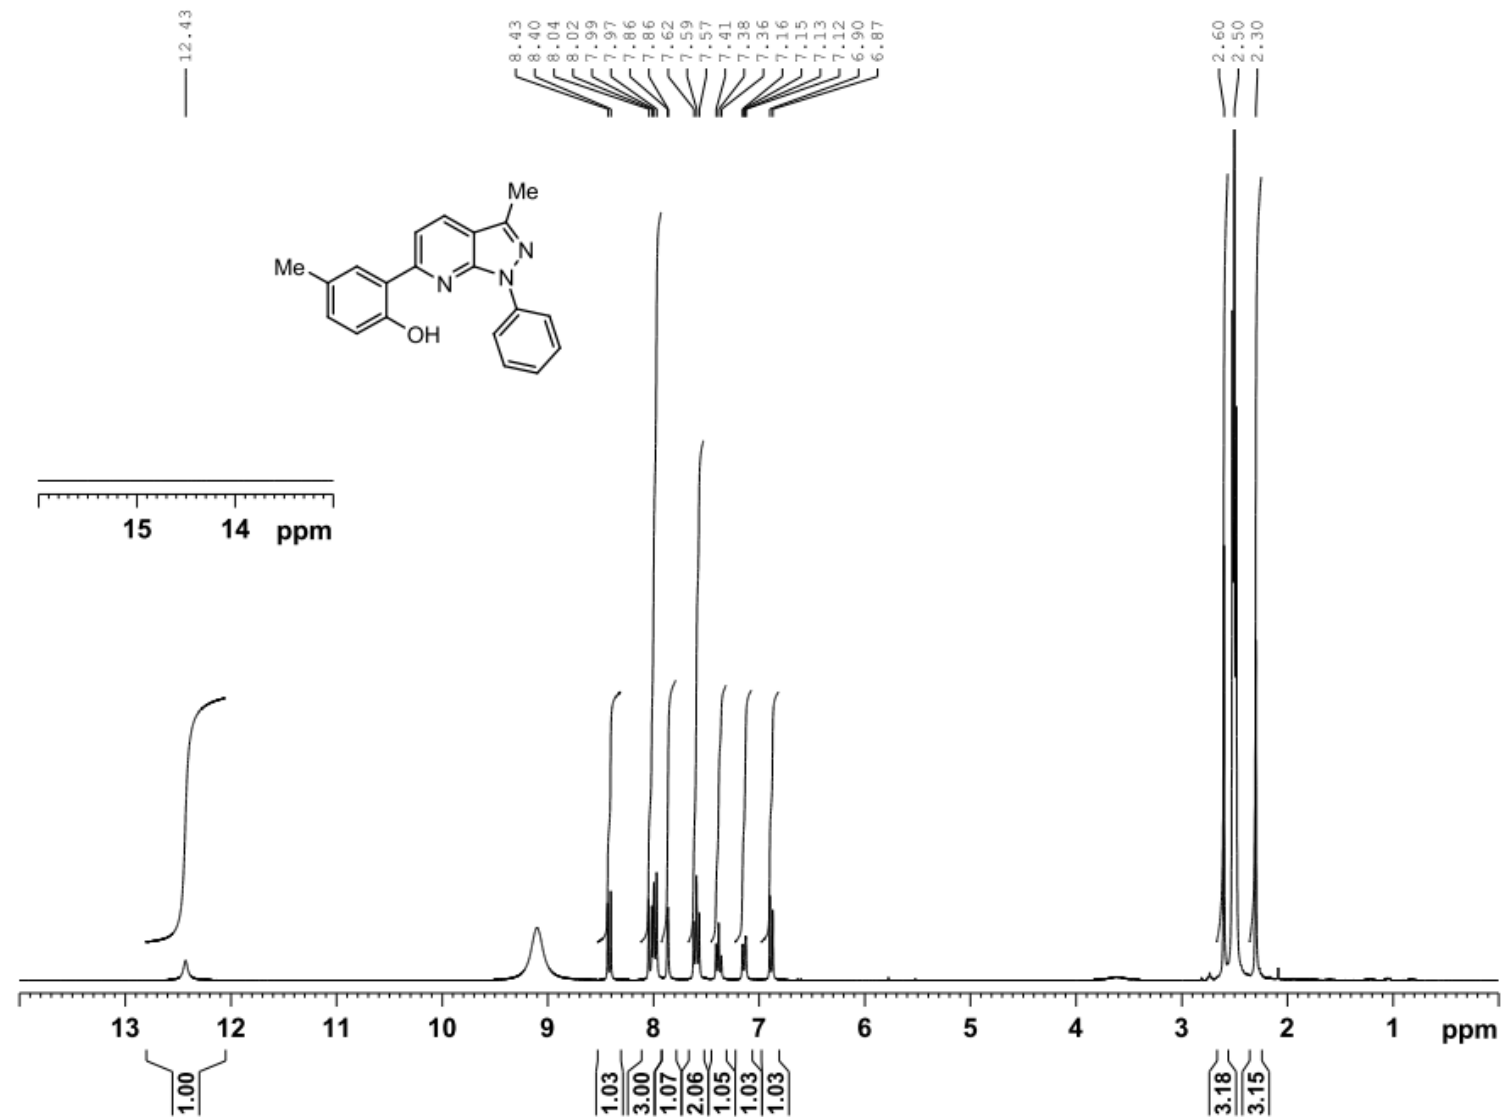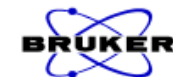

Current Data Parameters  
NAME 110110.u303 ag 140  
EXPNO 10  
PROCNO 1

F2 - Acquisition Parameters  
Date\_ 20110110  
Time 8.18  
INSTRUM spect  
PROBHD 5 mm PABBO BB-  
PULPROG zg30  
TD 65536  
SOLVENT DMSO  
NS 16  
DS 2  
SWH 6188.119 Hz  
FIDRES 0.094423 Hz  
AQ 5.2953587 sec  
RG 71.8  
DW 80.800 usec  
DE 10.00 usec  
TE 298.2 K  
D1 1.00000000 sec  
TD0 1

===== CHANNEL f1 =====  
NUC1 1H  
P1 10.00 usec  
PL1 0.00 dB  
PL1W 11.25325108 W  
SFO1 300.1318534 MHz

F2 - Processing parameters  
SI 32768  
SF 300.1300026 MHz  
WDW EM  
SSB 0  
LB 0.30 Hz  
GB 0  
PC 1.00

Gevorgyan AG140 13C DMSO

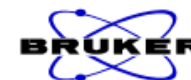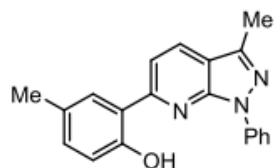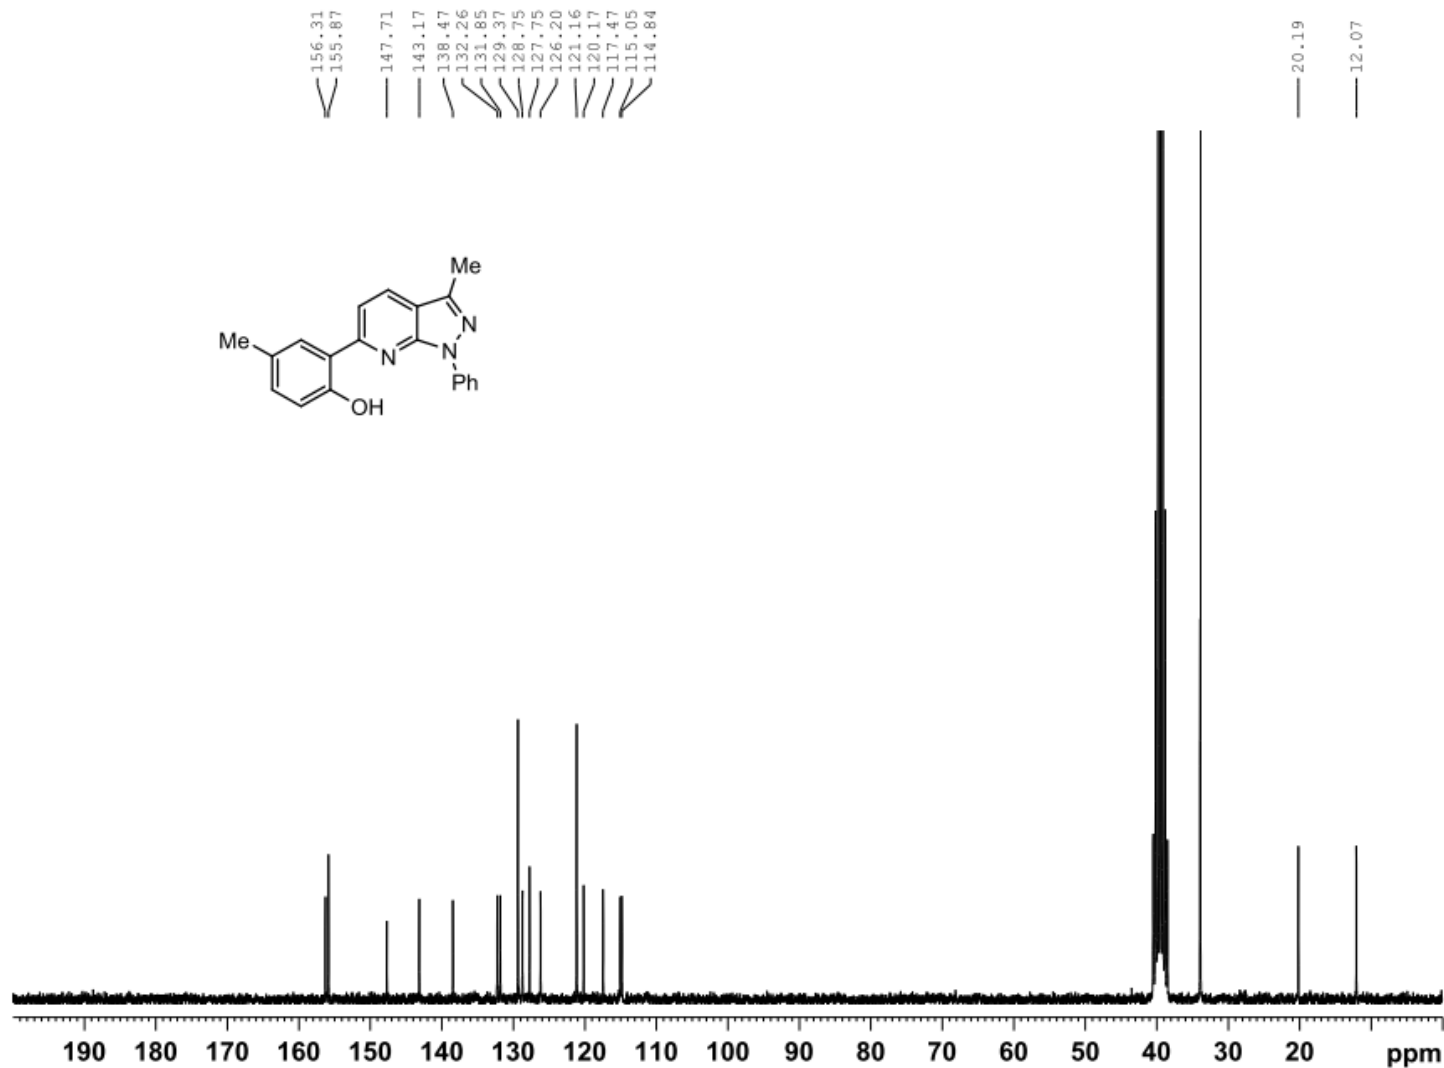

NAME 110111.203 ag 140 C  
EXPNO 10  
PROCNO 1  
Date\_ 20110111  
Time 15.23  
INSTRUM spect  
PROBHD 5 mm PABBO BB-  
PULPROG zgpg30  
TD 65536  
SOLVENT DMSO  
NS 1024  
DS 4  
SWH 15000.000 Hz  
FIDRES 0.228882 Hz  
AQ 2.1845834 sec  
RG 2050  
DW 33.333 usec  
DE 10.00 usec  
TE 298.0 K  
D1 2.00000000 sec  
d11 0.03000000 sec  
DELTA 1.89999998 sec  
TD0 1

===== CHANNEL f1 =====  
NUC1 13C  
P1 10.00 usec  
PL1 -1.00 dB  
SFO1 62.9015280 MHz

===== CHANNEL f2 =====  
CPDPRG2 waltz16  
NUC2 1H  
PCPD2 70.00 usec  
PL12 15.00 dB  
PL13 15.00 dB  
PL2 -2.50 dB  
SFO2 250.1310005 MHz  
SI 32768  
SF 62.8952692 MHz  
WDW EM  
SSB 0  
LB 1.00 Hz  
GB 0  
PC 1.40

Gevorgyan AG157 1H DMSO

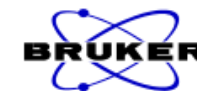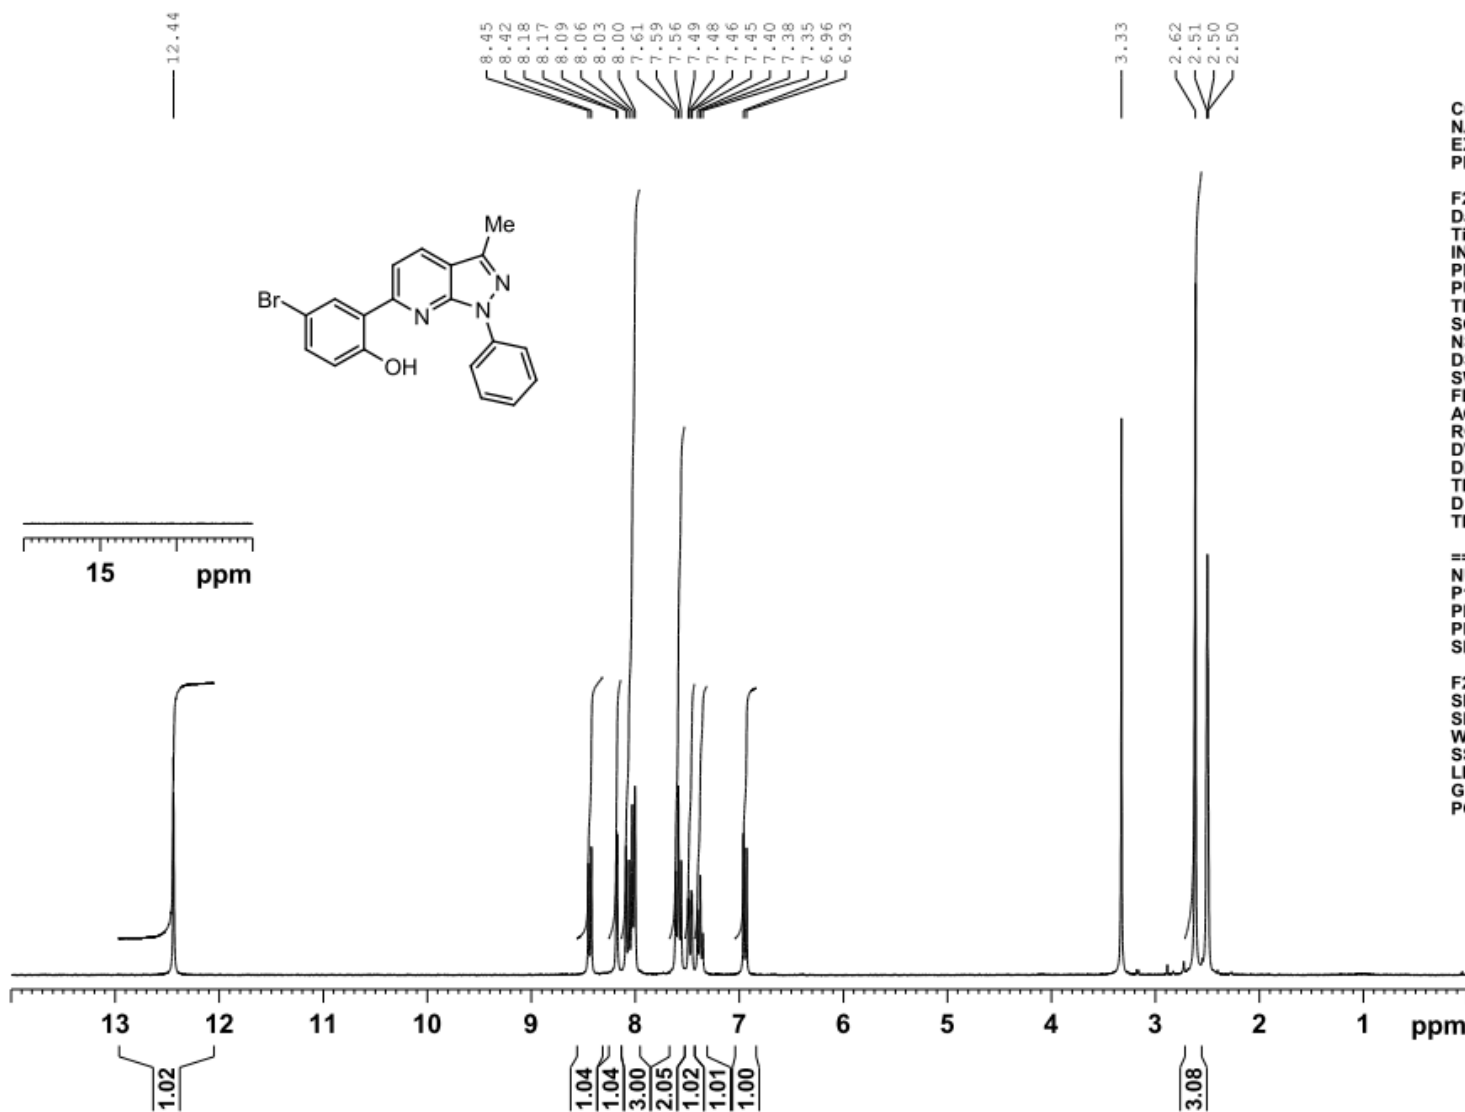

Current Data Parameters  
NAME 110120.u308 ag 157  
EXPNO 10  
PROCNO 1

F2 - Acquisition Parameters  
Date\_ 20110120  
Time 9.02  
INSTRUM spect  
PROBHD 5 mm PABBO BB-  
PULPROG zg30  
TD 65536  
SOLVENT DMSO  
NS 16  
DS 2  
SWH 6188.119 Hz  
FIDRES 0.094423 Hz  
AQ 5.2953587 sec  
RG 161  
DW 80.800 usec  
DE 10.00 usec  
TE 298.2 K  
D1 1.0000000 sec  
TD0 1

===== CHANNEL f1 =====  
NUC1 1H  
P1 10.00 usec  
PL1 0.00 dB  
PL1W 11.25325108 W  
SFO1 300.1318534 MHz

F2 - Processing parameters  
SI 32768  
SF 300.1300056 MHz  
WDW EM  
SSB 0  
LB 0.30 Hz  
GB 0  
PC 1.00

Gevorgyan AG157 13C DMSO

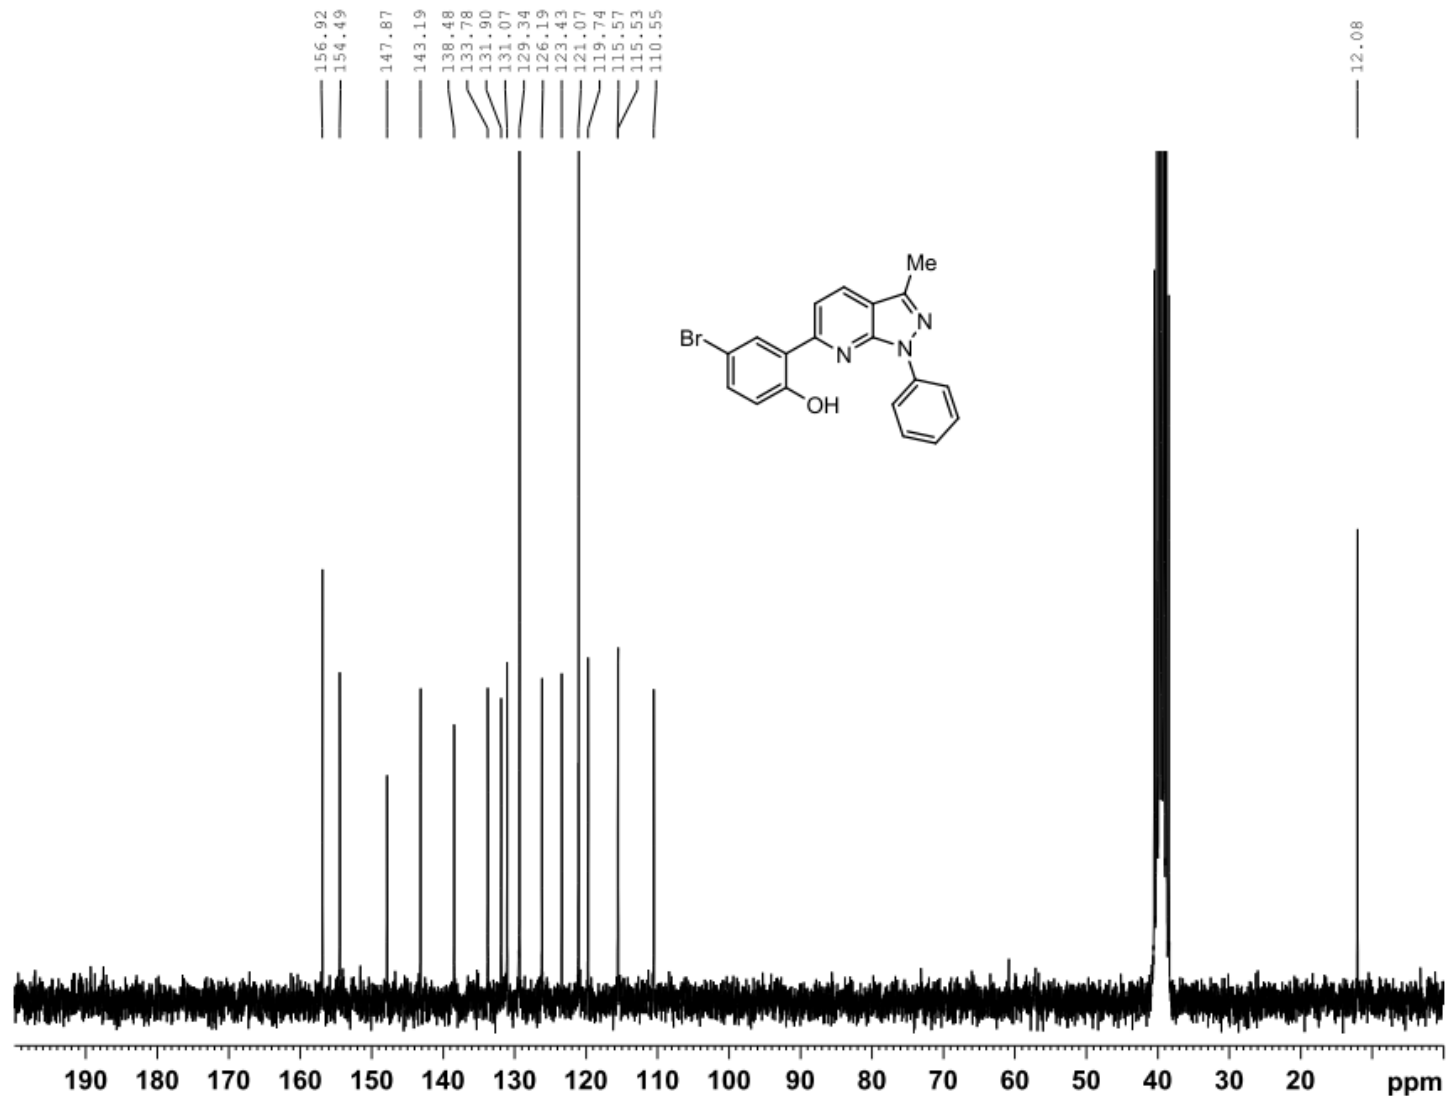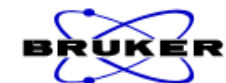

Current Data Parameters  
NAME 110121.226 ag 157 C  
EXPNO 10  
PROCNO 1

F2 - Acquisition Parameters  
Date\_ 20110123  
Time 16.44  
INSTRUM spect  
PROBHD 5 mm PABBO BB-  
PULPROG zgpg30  
TD 65536  
SOLVENT DMSO  
NS 1600  
DS 4  
SWH 15000.000 Hz  
FIDRES 0.228882 Hz  
AQ 2.1845834 sec  
RG 2050  
DW 33.333 usec  
DE 10.00 usec  
TE 297.9 K  
D1 2.00000000 sec  
d11 0.03000000 sec  
DELTA 1.89999998 sec  
TD0 1

===== CHANNEL f1 =====  
NUC1 13C  
P1 10.00 usec  
PL1 -1.00 dB  
SFO1 62.9015280 MHz

===== CHANNEL f2 =====  
CPDPRG2 waltz16  
NUC2 1H  
PCPD2 70.00 usec  
PL12 15.00 dB  
PL13 15.00 dB  
PL2 -2.50 dB  
SFO2 250.1310005 MHz

F2 - Processing parameters  
SI -32768  
SF 62.8952697 MHz  
WDW EM  
SSB 0  
LB 1.00 Hz  
GB 0  
PC 1.40



Gevorgyan AG 134 (3) 1H DMSO 80 grd\_C

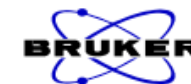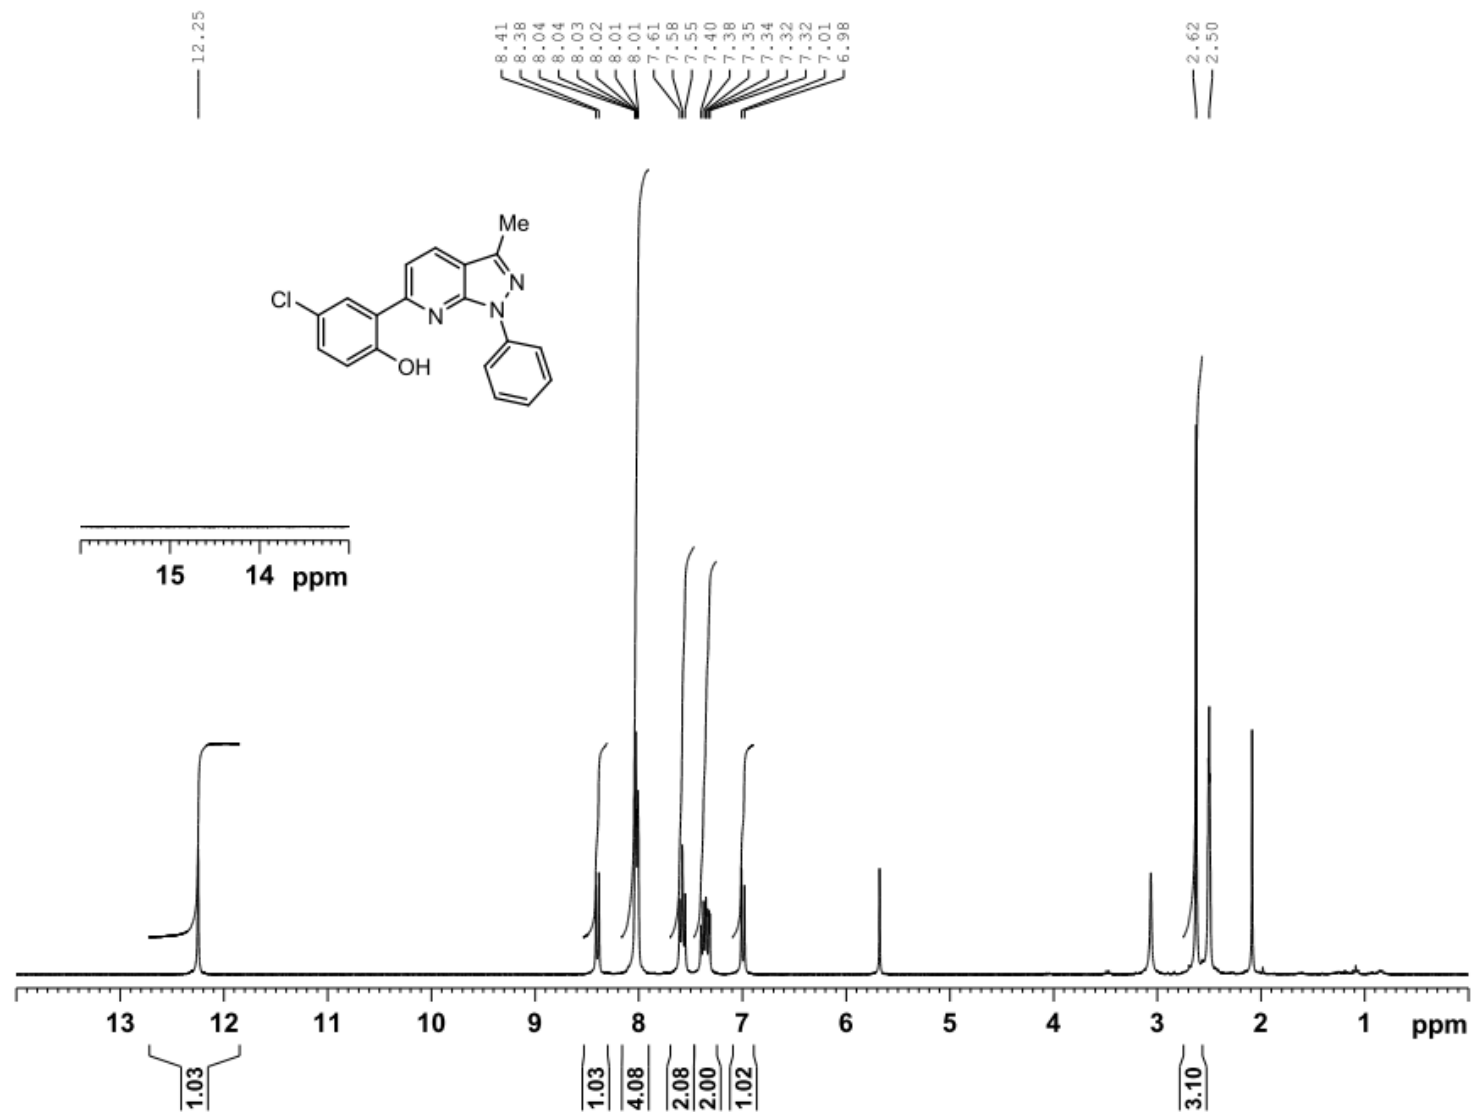

Current Data Parameters  
NAME 110310.u342 ag 134  
EXPNO 10  
PROCNO 1

F2 - Acquisition Parameters  
Date\_ 20110310  
Time 15.32  
INSTRUM spect  
PROBHD 5 mm PABBO BB-  
PULPROG zg30  
TD 65536  
SOLVENT DMSO  
NS 16  
DS 2  
SWH 6188.119 Hz  
FIDRES 0.094423 Hz  
AQ 5.2953587 sec  
RG 114  
DW 80.800 usec  
DE 10.00 usec  
TE 353.5 K  
D1 1.00000000 sec  
TD0 1

==== CHANNEL f1 =====  
NUC1 1H  
P1 10.00 usec  
PL1 0.00 dB  
PL1W 11.25325108 W  
SFO1 300.1318534 MHz

F2 - Processing parameters  
SI 32768  
SF 300.1300009 MHz  
WDW EM  
SSB 0  
LB 0.30 Hz  
GB 0  
PC 1.00

Gevorgyan AG134 13C DMSO

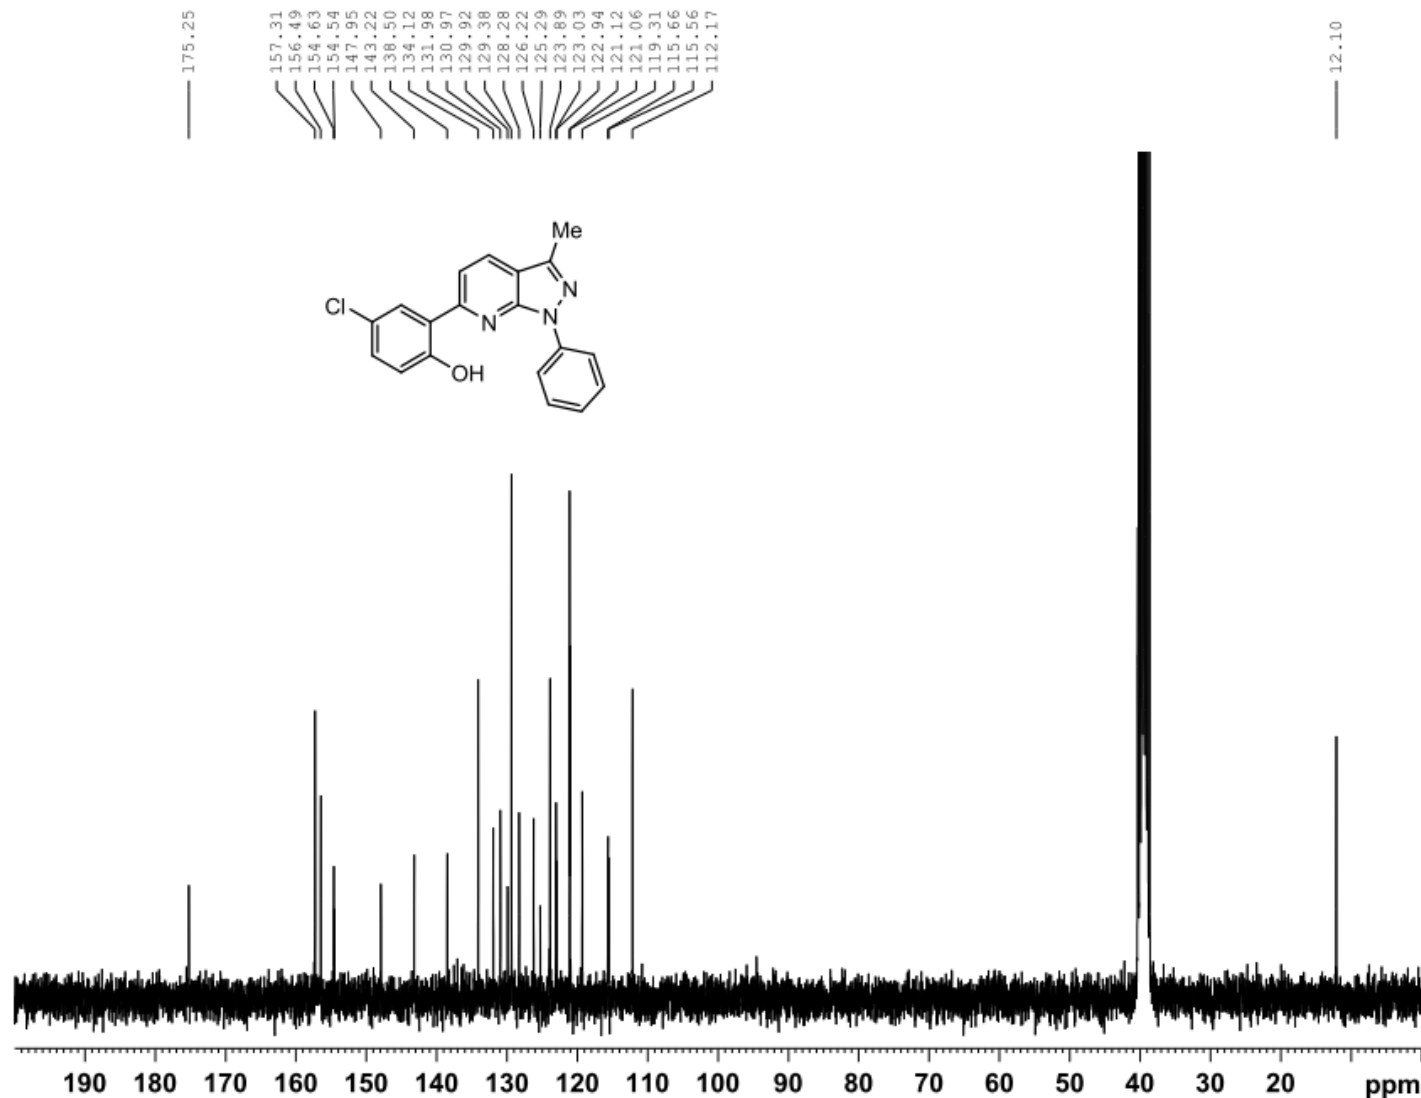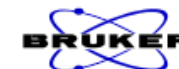

Current Data Parameters  
NAME 110104.u325 ag 134 C  
EXPNO 10  
PROCNO 1

F2 - Acquisition Parameters  
Date\_ 20110105  
Time 5.22  
INSTRUM spect  
PROBHD 5 mm PABBO BB-  
PULPROG zgpg30  
TD 65536  
SOLVENT DMSO  
NS 1400  
DS 4  
SWH 18028.846 Hz  
FIDRES 0.275098 Hz  
AQ 1.8175818 sec  
RG 2050  
DW 27.733 usec  
DE 10.00 usec  
TE 298.2 K  
D1 2.0000000 sec  
D11 0.03000000 sec  
TD0 1

===== CHANNEL f1 =====  
NUC1 13C  
P1 10.00 usec  
PL1 -0.50 dB  
PL1W 33.25691986 W  
SFO1 75.4752953 MHz

===== CHANNEL f2 =====  
CPDPRG2 waltz16  
NUC2 1H  
PCPD2 72.00 usec  
PL2 0.00 dB  
PL12 17.00 dB  
PL13 17.00 dB  
PL2W 11.25325108 W  
PL12W 0.22453187 W  
PL13W 0.22453187 W  
SFO2 300.1312005 MHz

F2 - Processing parameters  
SI 32768  
SF 75.4677881 MHz  
WDW EM  
SSB 0  
LB 1.00 Hz  
GB 0  
PC 1.40

Mkrtchyan SM422 1H DMSO

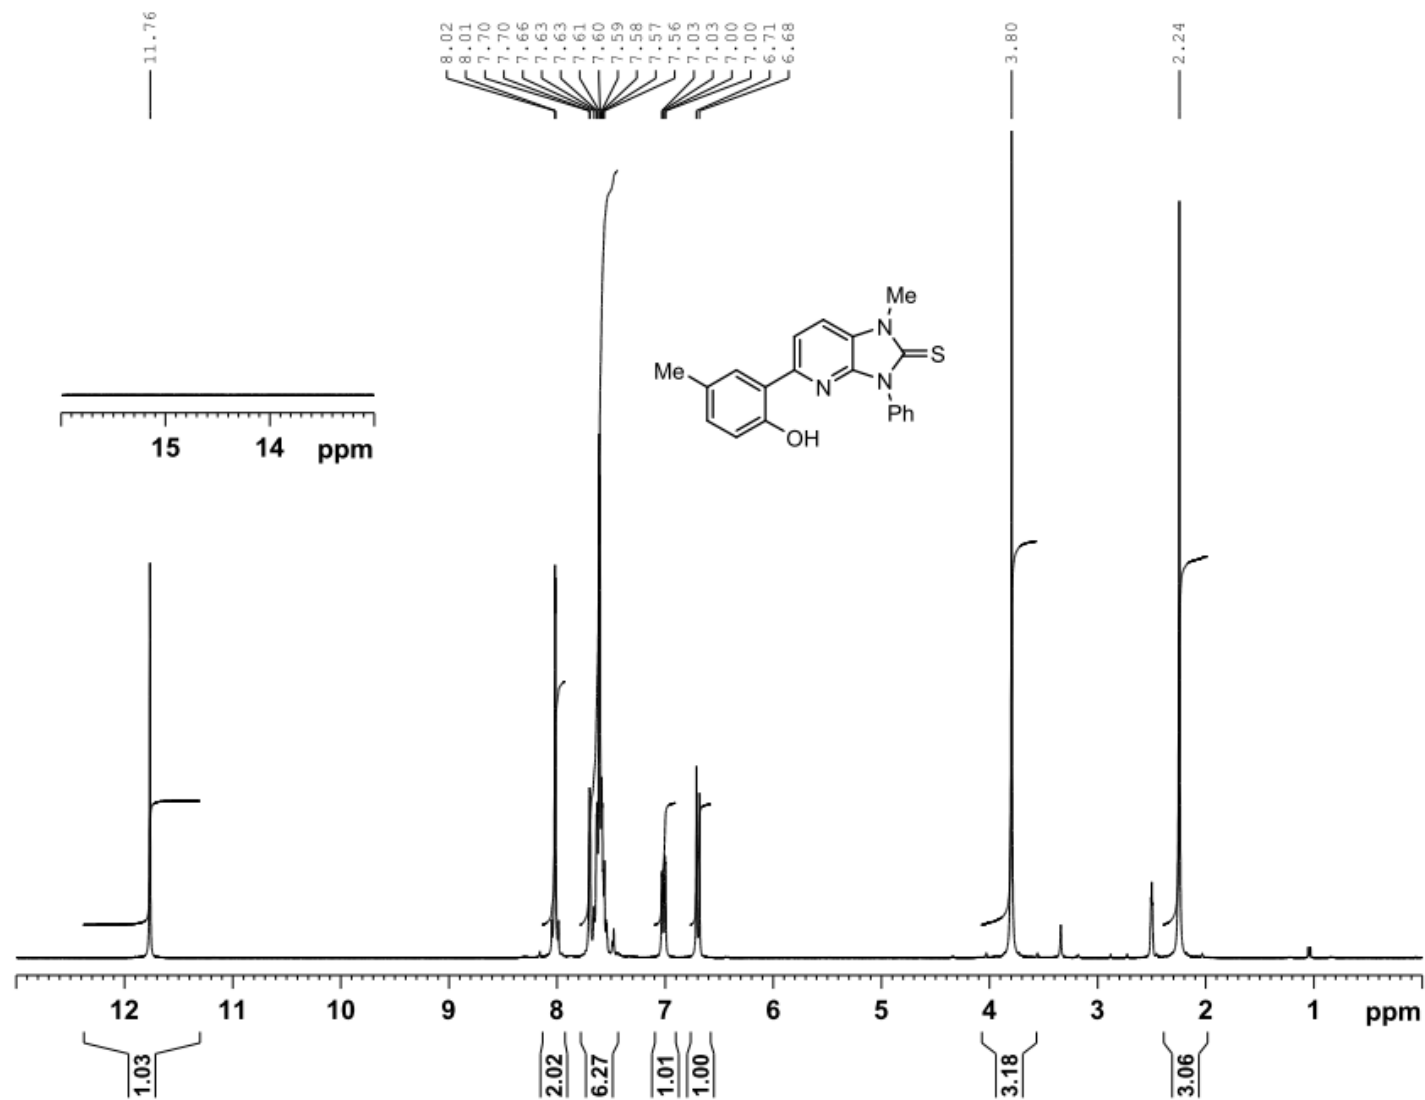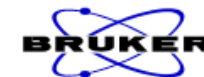

Current Data Parameters  
NAME 110303.u308 sm 422  
EXPNO 10  
PROCNO 1

F2 - Acquisition Parameters  
Date\_ 20110303  
Time 9.53  
INSTRUM spect  
PROBHD 5 mm PABBO BB-  
PULPROG zg30  
TD 65536  
SOLVENT DMSO  
NS 16  
DS 2  
SWH 6188.119 Hz  
FIDRES 0.094423 Hz  
AQ 5.2953587 sec  
RG 90.5  
DW 80.800 usec  
DE 10.00 usec  
TE 298.2 K  
D1 1.00000000 sec  
TD0 1

===== CHANNEL f1 =====  
NUC1 1H  
P1 10.00 usec  
PL1 0.00 dB  
PL1W 11.25325108 W  
SFO1 300.1318534 MHz

F2 - Processing parameters  
SI 32768  
SF 300.1300054 MHz  
WDW EM  
SSB 0  
LB 0.30 Hz  
GB 0  
PC 1.00

Mkrtchyan SM422 13C DMSO

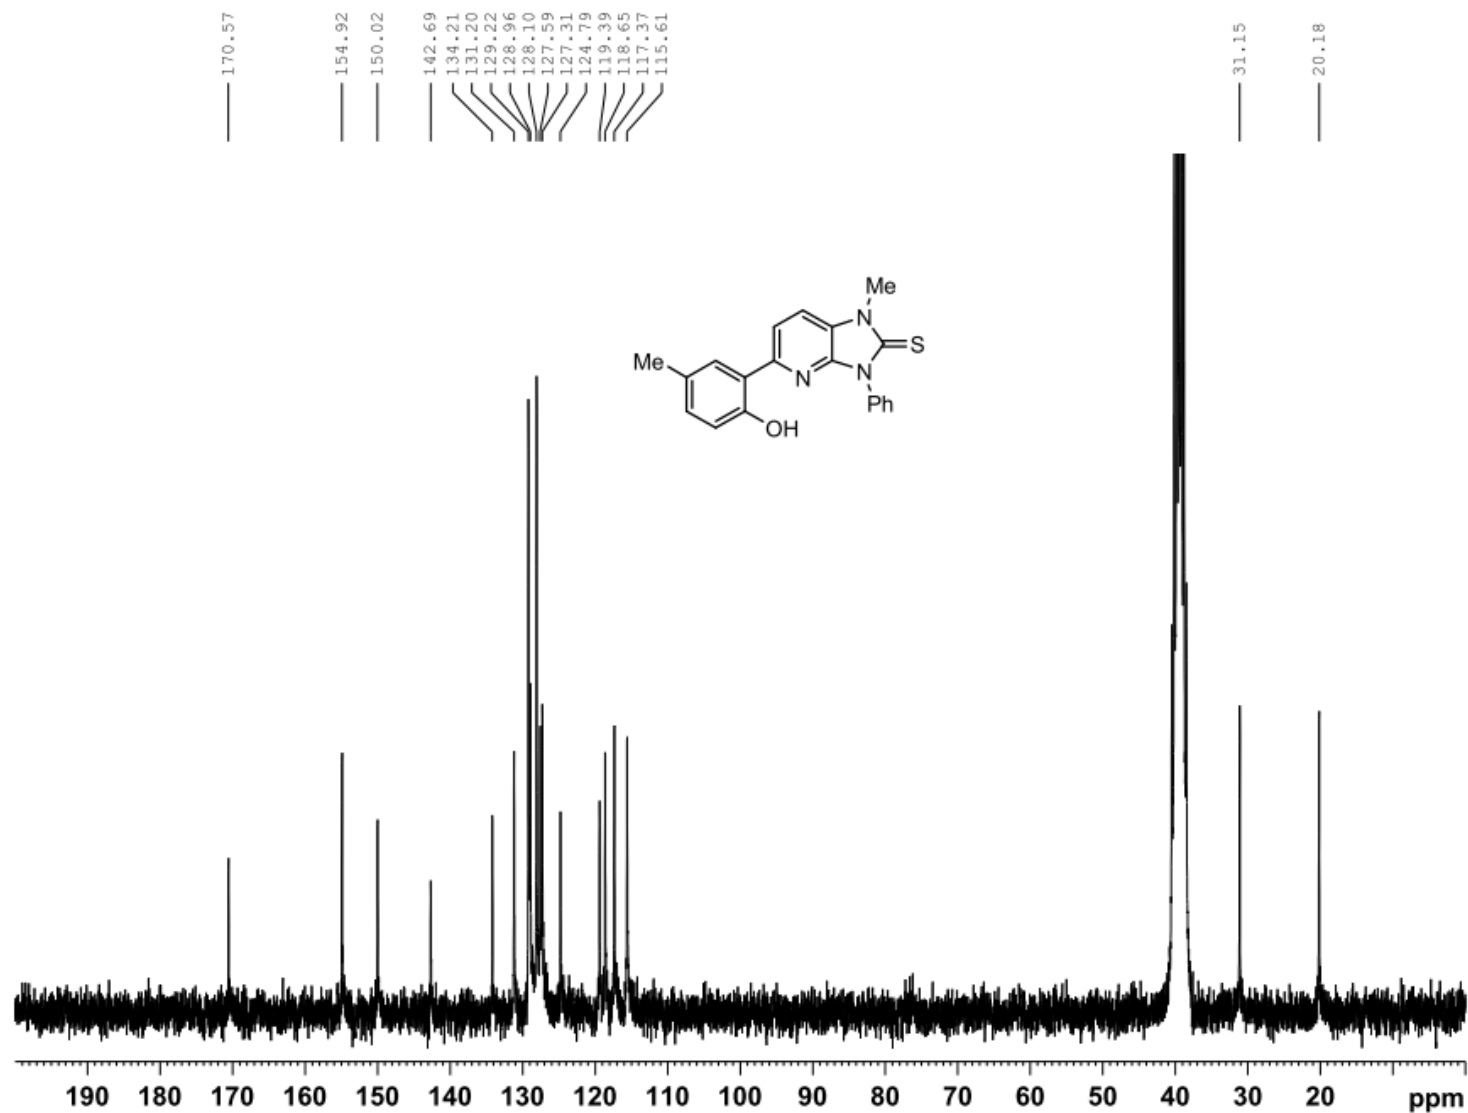

Current Data Parameters  
NAME 110304.225 sm 422  
EXPNO 10  
PROCNO 1

F2 - Acquisition Parameters  
Date\_ 20110306  
Time 10.56  
INSTRUM spect  
PROBHD 5 mm PABBO BB-  
PULPROG zgpg30  
TD 65536  
SOLVENT DMSO  
NS 1024  
DS 4  
SWH 15000.000 Hz  
FIDRES 0.228882 Hz  
AQ 2.1845834 sec  
RG 2050  
DW 33.333 usec  
DE 10.00 usec  
TE 297.9 K  
D1 2.0000000 sec  
d11 0.0300000 sec  
DELTA 1.89999998 sec  
TD0 1

=====  
CHANNEL f1  
NUC1 13C  
P1 10.00 usec  
PL1 -1.00 dB  
SFO1 62.9015280 MHz

=====  
CHANNEL f2  
CPDPRG2 waltz16  
NUC2 1H  
PCPD2 70.00 usec  
PL12 15.00 dB  
PL13 15.00 dB  
PL2 -2.50 dB  
SFO2 250.1310005 MHz

F2 - Processing parameters  
SI 32768  
SF 62.8952701 MHz  
WDW EM  
SSB 0  
LB 1.00 Hz  
GB 0  
PC 1.40

Mkrtchyan SM414 1H DMSO

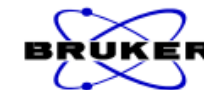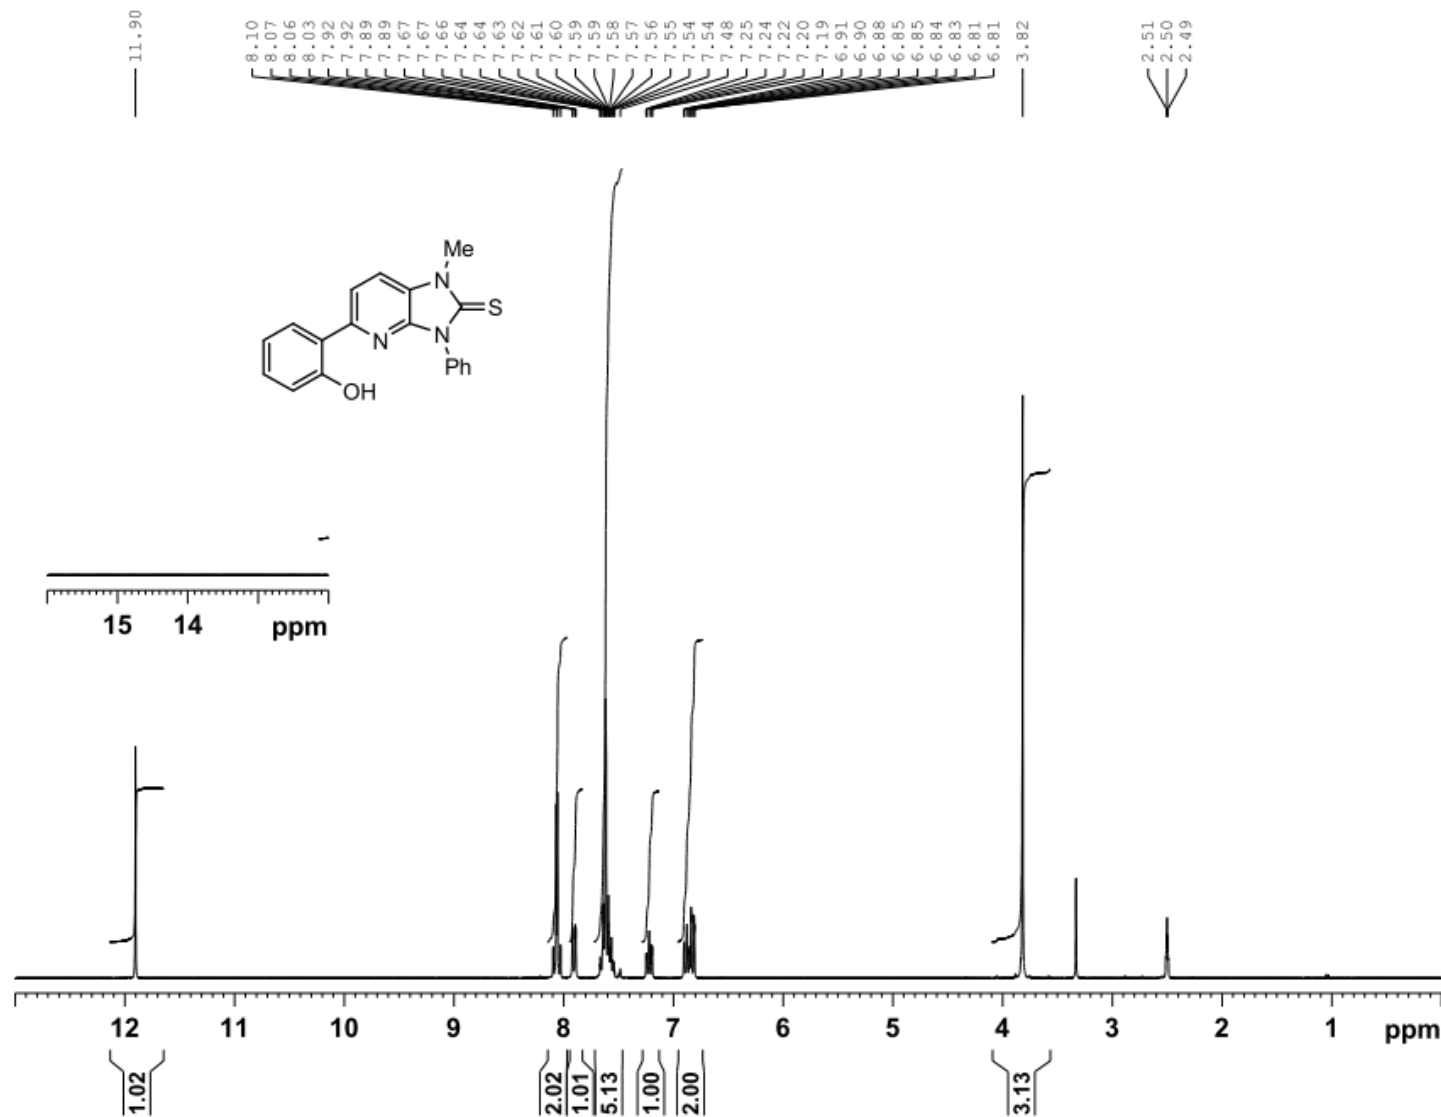

Current Data Parameters  
NAME 110228.u310 sm 414  
EXPNO 10  
PROCNO 1

F2 - Acquisition Parameters  
Date\_ 20110228  
Time 11.39  
INSTRUM spect  
PROBHD 5 mm PABBO BB-  
PULPROG zg30  
TD 65536  
SOLVENT DMSO  
NS 16  
DS 2  
SWH 6188.119 Hz  
FIDRES 0.094423 Hz  
AQ 5.2953587 sec  
RG 144  
DW 80.800 usec  
DE 10.00 usec  
TE 298.2 K  
D1 1.00000000 sec  
TD0 1

===== CHANNEL f1 =====  
NUC1 1H  
P1 10.00 usec  
PL1 0.00 dB  
PL1W 11.25325108 W  
SFO1 300.1318534 MHz

F2 - Processing parameters  
SI 32768  
SF 300.1300048 MHz  
WDW EM  
SSB 0  
LB 0.30 Hz  
GB 0  
PC 1.00

Mkrtchyan SM414 13C DMSO

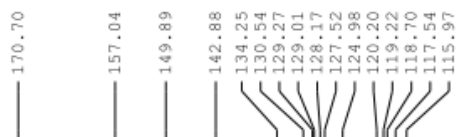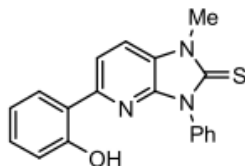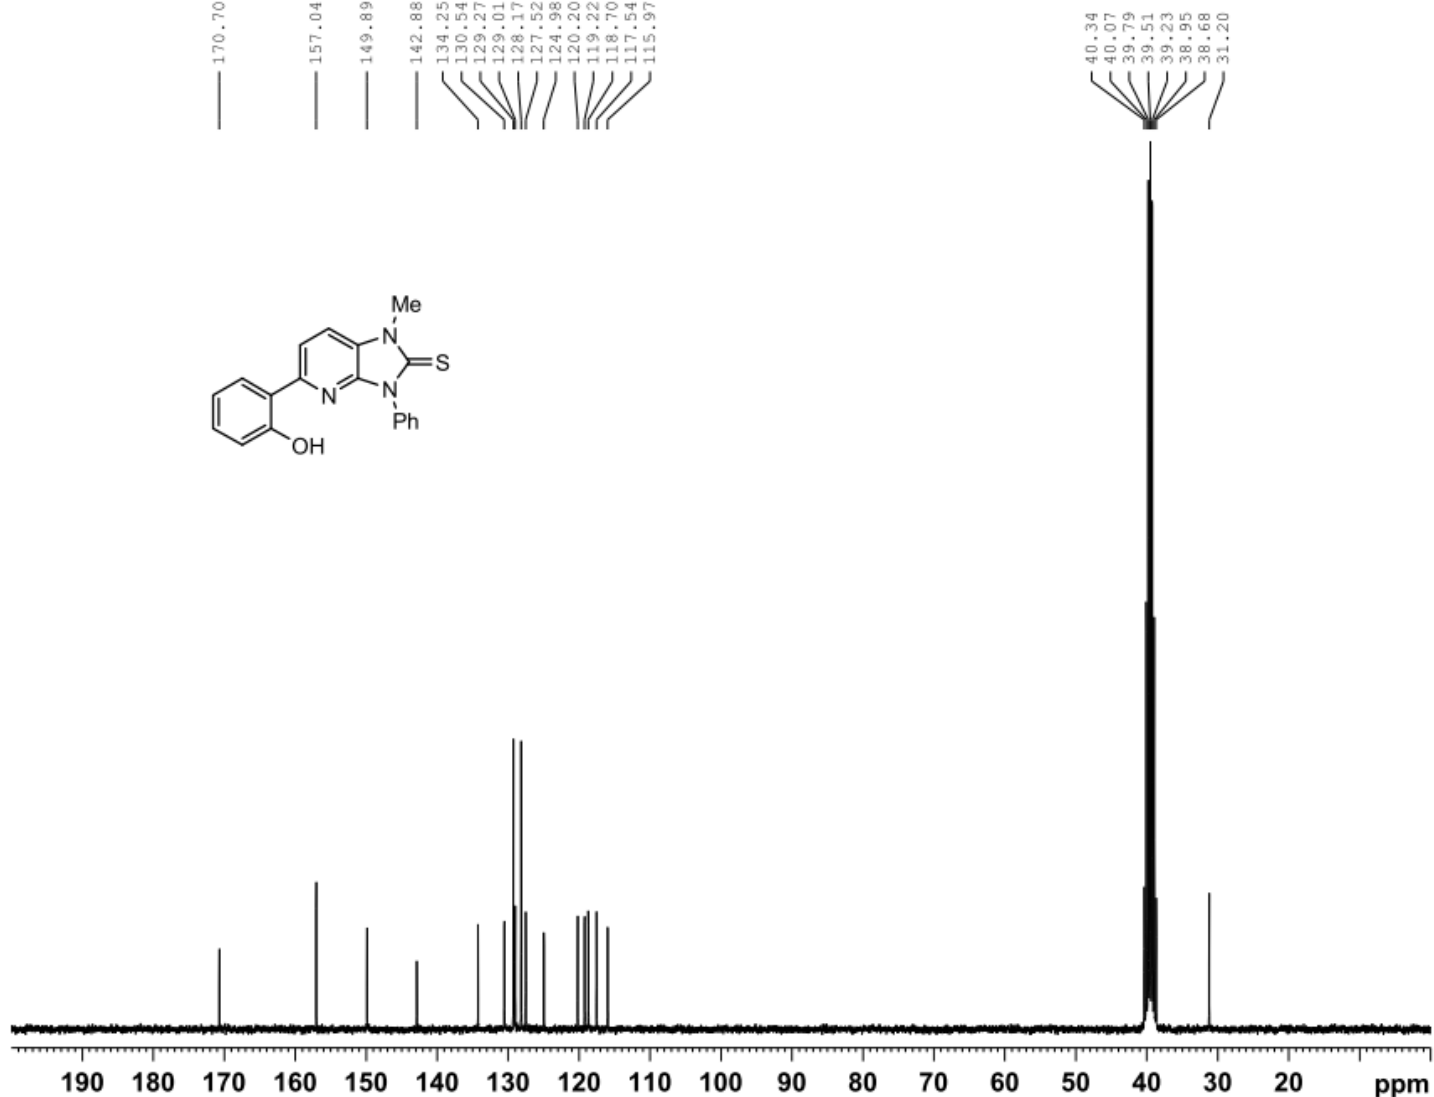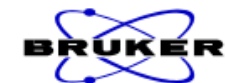

Current Data Parameters  
NAME 110301.u337 sm 414 C  
EXPNO 10  
PROCNO 1

F2 - Acquisition Parameters  
Date\_ 20110302  
Time 7.50  
INSTRUM spect  
PROBHD 5 mm PABBO BB-  
PULPROG zgpg30  
TD 65536  
SOLVENT DMSO  
NS 800  
DS 4  
SWH 18028.846 Hz  
FIDRES 0.275098 Hz  
AQ 1.8175818 sec  
RG 2050  
DW 27.733 usec  
DE 10.00 usec  
TE 296.9 K  
D1 2.00000000 sec  
D11 0.03000000 sec  
TD0 1

===== CHANNEL f1 =====  
NUC1 13C  
P1 10.00 usec  
PL1 -0.50 dB  
PL1W 33.25691986 W  
SFO1 75.4752953 MHz

===== CHANNEL f2 =====  
CPDPRG2 waltz16  
NUC2 1H  
PCPD2 72.00 usec  
PL2 0.00 dB  
PL12 17.00 dB  
PL13 17.00 dB  
PL2W 11.25325108 W  
PL12W 0.22453187 W  
PL13W 0.22453187 W  
SFO2 300.1312005 MHz

F2 - Processing parameters  
SI 32768  
SF 75.4677876 MHz  
WDW EM  
SSB 0  
LB 1.00 Hz  
GB 0  
PC 1.40

Mkrtchyan SM390 1H DMSO

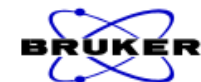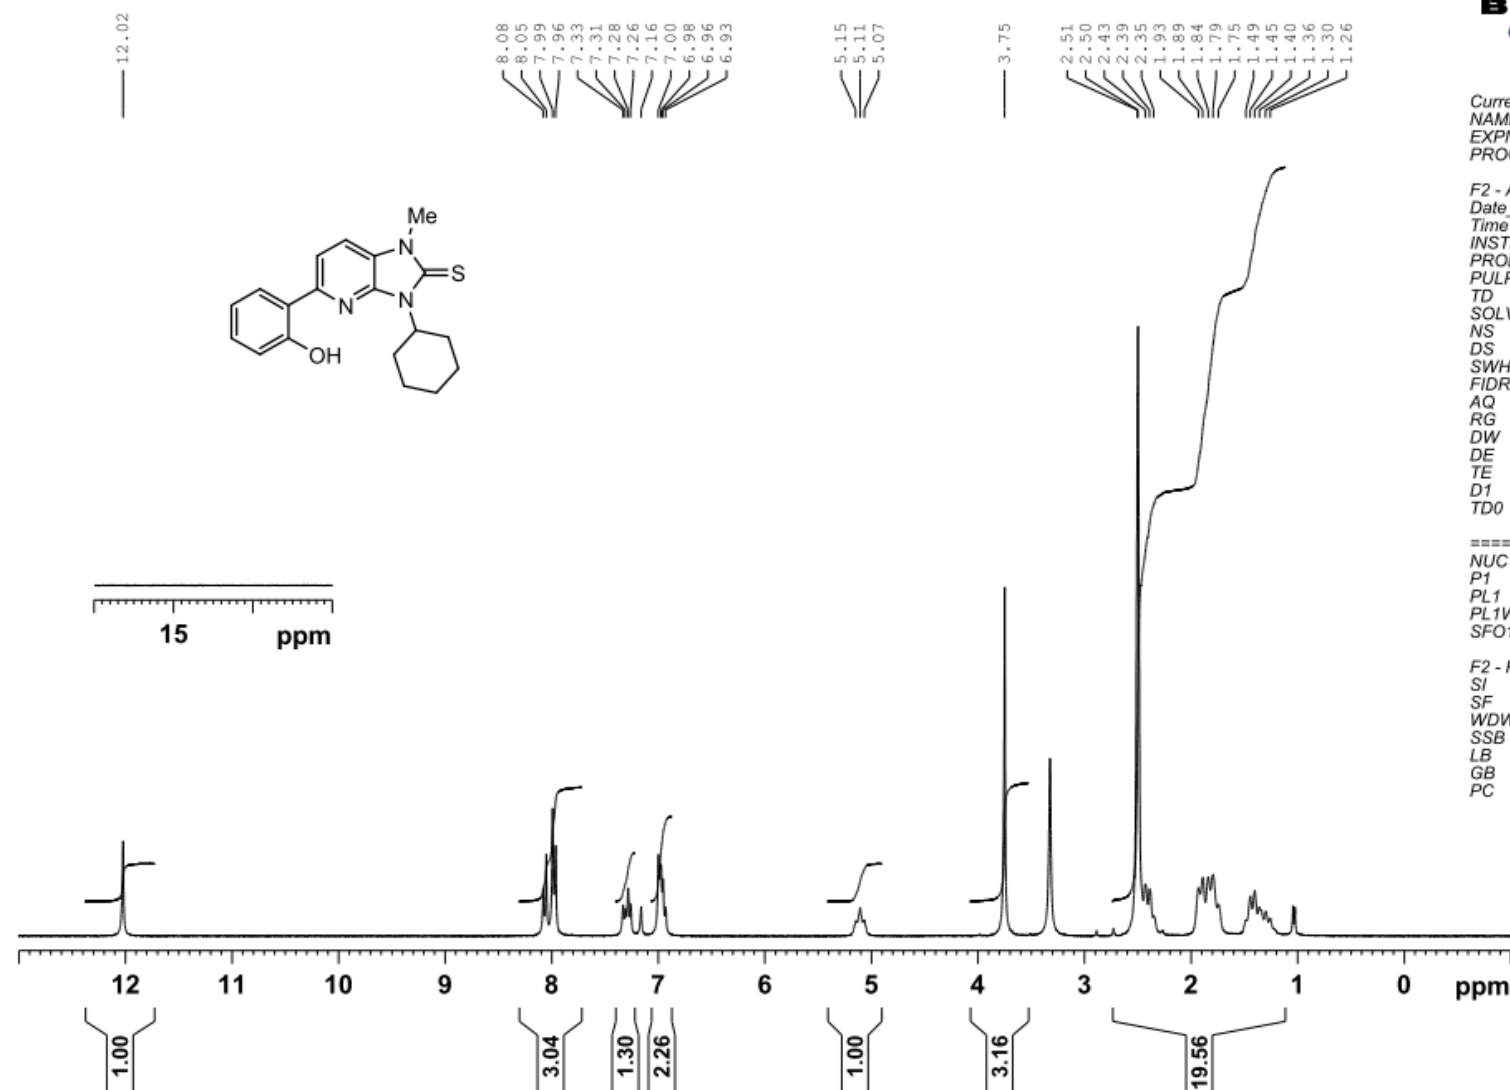

Current Data Parameters  
NAME 110111.u302 sm 390  
EXPNO 11  
PROCNO 1

F2 - Acquisition Parameters  
Date\_ 20110111  
Time 9.53  
INSTRUM spect  
PROBHD 5 mm PABBO BB-  
PULPROG zg30  
TD 65536  
SOLVENT DMSO  
NS 16  
DS 2  
SWH 6188.119 Hz  
FIDRES 0.094423 Hz  
AQ 5.2953587 sec  
RG 144  
DW 80.800 usec  
DE 10.00 usec  
TE 298.2 K  
D1 1.0000000 sec  
TD0 1

===== CHANNEL f1 =====  
NUC1 1H  
P1 10.00 usec  
PL1 0.00 dB  
PL1W 11.25325108 W  
SFO1 300.1318534 MHz

F2 - Processing parameters  
SI 32768  
SF 300.1300075 MHz  
WDW EM  
SSB 0  
LB 0.30 Hz  
GB 0  
PC 1.00

Mkrtchyan SM-390 13C DMSO

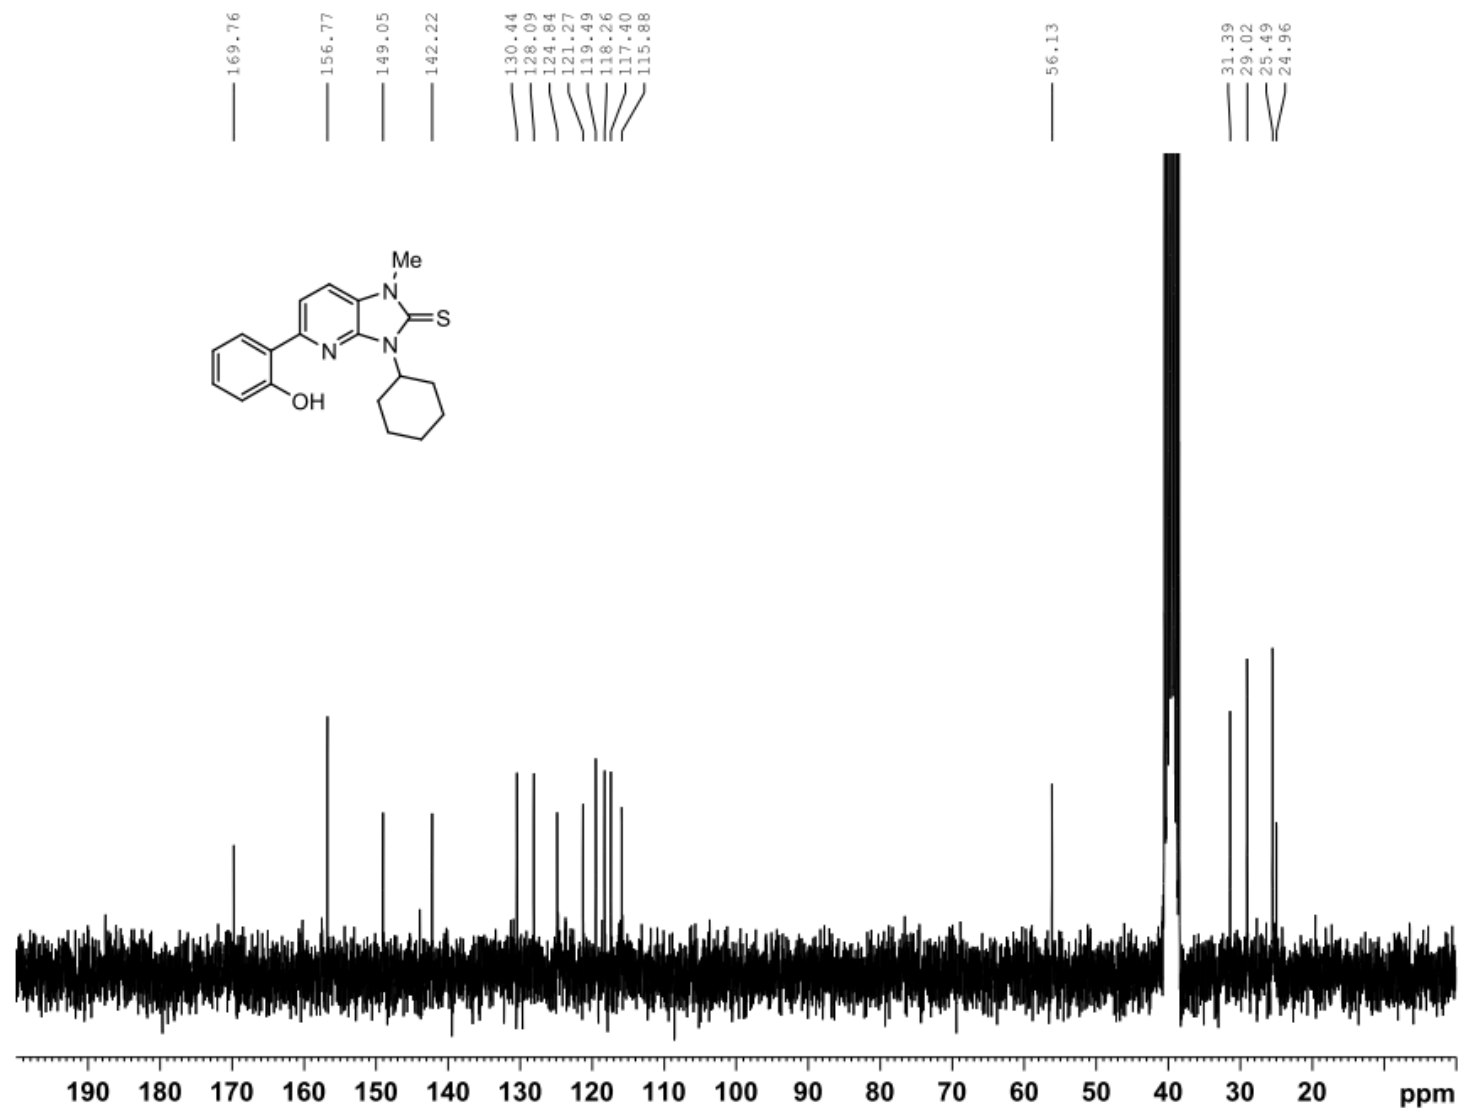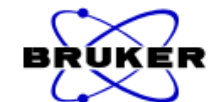

Current Data Parameters  
NAME 110120.215 sm 390 C  
EXPNO 10  
PROCNO 1

F2 - Acquisition Parameters  
Date\_ 20110121  
Time 7.29  
INSTRUM spect  
PROBHD 5 mm PABBO BB-  
PULPROG zgpg30  
TD 65536  
SOLVENT DMSO  
NS 1400  
DS 4  
SWH 15000.000 Hz  
FIDRES 0.228882 Hz  
AQ 2.1845834 sec  
RG 2050  
DW 33.333 usec  
DE 10.00 usec  
TE 297.9 K  
D1 2.00000000 sec  
d11 0.03000000 sec  
DELTA 1.89999998 sec  
TD0 1

===== CHANNEL f1 =====  
NUC1 13C  
P1 10.00 usec  
PL1 -1.00 dB  
SFO1 62.9015280 MHz

===== CHANNEL f2 =====  
CPDPRG2 waltz16  
NUC2 1H  
PCPD2 70.00 usec  
PL12 15.00 dB  
PL13 15.00 dB  
PL2 -2.50 dB  
SFO2 250.1310005 MHz

F2 - Processing parameters  
SI 32768  
SF 62.8952687 MHz  
WDW EM  
SSB 0  
LB 1.00 Hz  
GB 0  
PC 1.40



Mkrtchyan SM431 1H DMSO

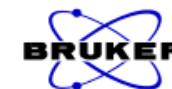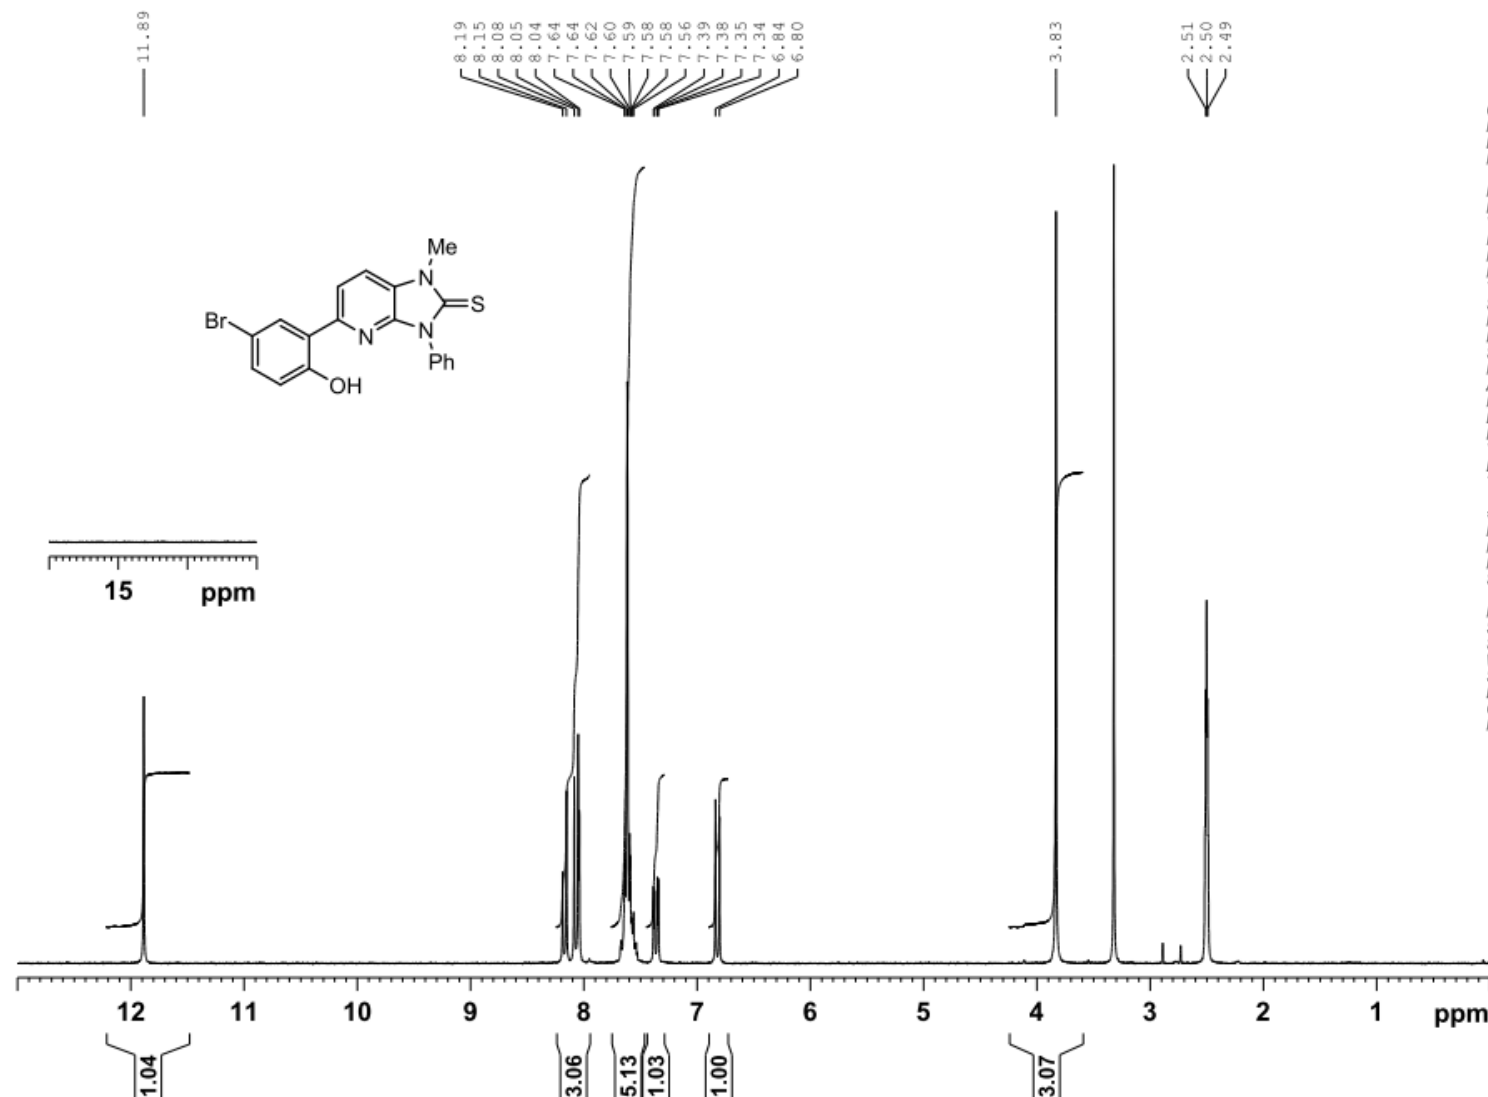

Current Data Parameters  
 NAME 110309.216 sm 431  
 EXPNO 10  
 PROCNO 1

F2 - Acquisition Parameters  
 Date\_ 20110309  
 Time 12.58  
 INSTRUM spect  
 PROBHD 5 mm PABBO BB-  
 PULPROG zg30  
 TD 65536  
 SOLVENT DMSO  
 NS 16  
 DS 2  
 SWH 5165.289 Hz  
 FIDRES 0.078816 Hz  
 AQ 6.3439350 sec  
 RG 1440  
 DW 96.800 usec  
 DE 10.00 usec  
 TE 298.1 K  
 D1 1.00000000 sec  
 TD0 1

===== CHANNEL f1 =====  
 NUC1 1H  
 P1 10.00 usec  
 PL1 -2.50 dB  
 SFO1 250.1315447 MHz

F2 - Processing parameters  
 SI 32768  
 SF 250.1299985 MHz  
 WDW EM  
 SSB 0  
 LB 0.30 Hz  
 GB 0  
 PC 1.00

Mkrtchyan SM431 13C DMSO

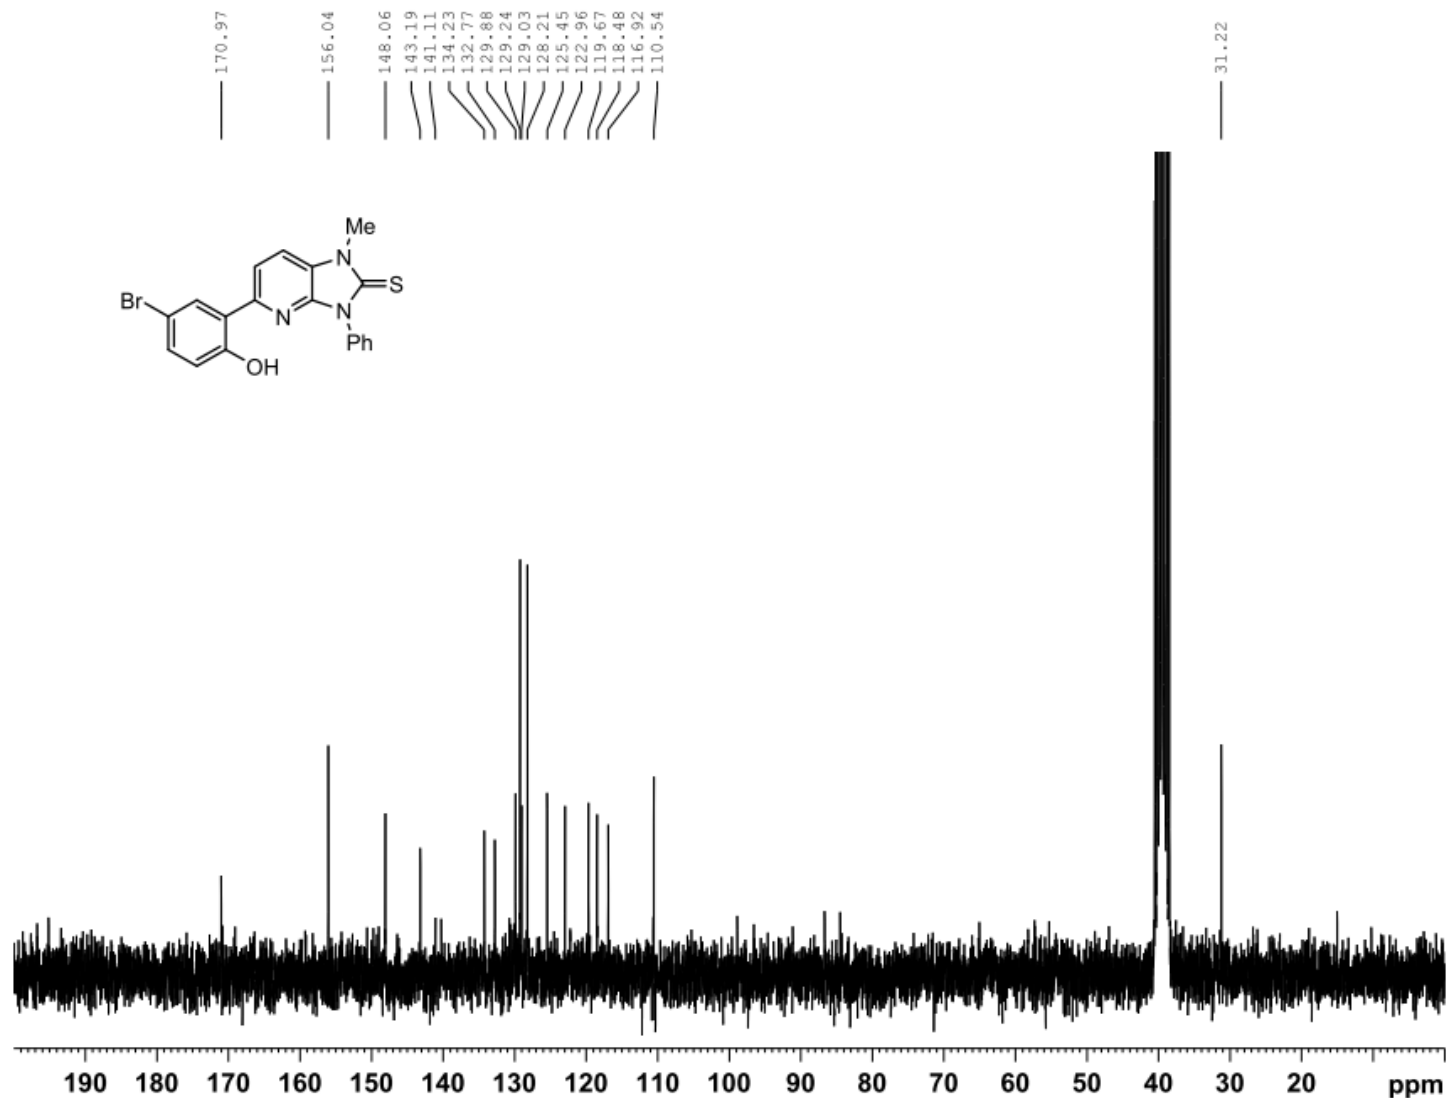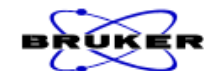

Current Data Parameters  
NAME 110310.209 sm 431 C  
EXPNO 10  
PROCNO 1

F2 - Acquisition Parameters  
Date\_ 20110311  
Time 1.51  
INSTRUM spect  
PROBHD 5 mm PABBO BB-  
PULPROG zgpg30  
TD 65536  
SOLVENT DMSO  
NS 1024  
DS 4  
SWH 15000.000 Hz  
FIDRES 0.228882 Hz  
AQ 2.1845834 sec  
RG 2050  
DW 33.333 usec  
DE 10.00 usec  
TE 298.0 K  
D1 2.0000000 sec  
d11 0.0300000 sec  
DELTA 1.89999998 sec  
TD0 1

==== CHANNEL f1 =====  
NUC1 13C  
P1 10.00 usec  
PL1 -1.00 dB  
SFO1 62.9015280 MHz

==== CHANNEL f2 =====  
CPDPRG2 waltz16  
NUC2 1H  
PCPD2 70.00 usec  
PL12 15.00 dB  
PL13 15.00 dB  
PL2 -2.50 dB  
SFO2 250.1310005 MHz

F2 - Processing parameters  
SI 32768  
SF 62.8952697 MHz  
WDW EM  
SSB 0  
LB 1.00 Hz  
GB 0  
PC 1.40

Hakobyan SM 379 1H DMSO

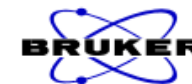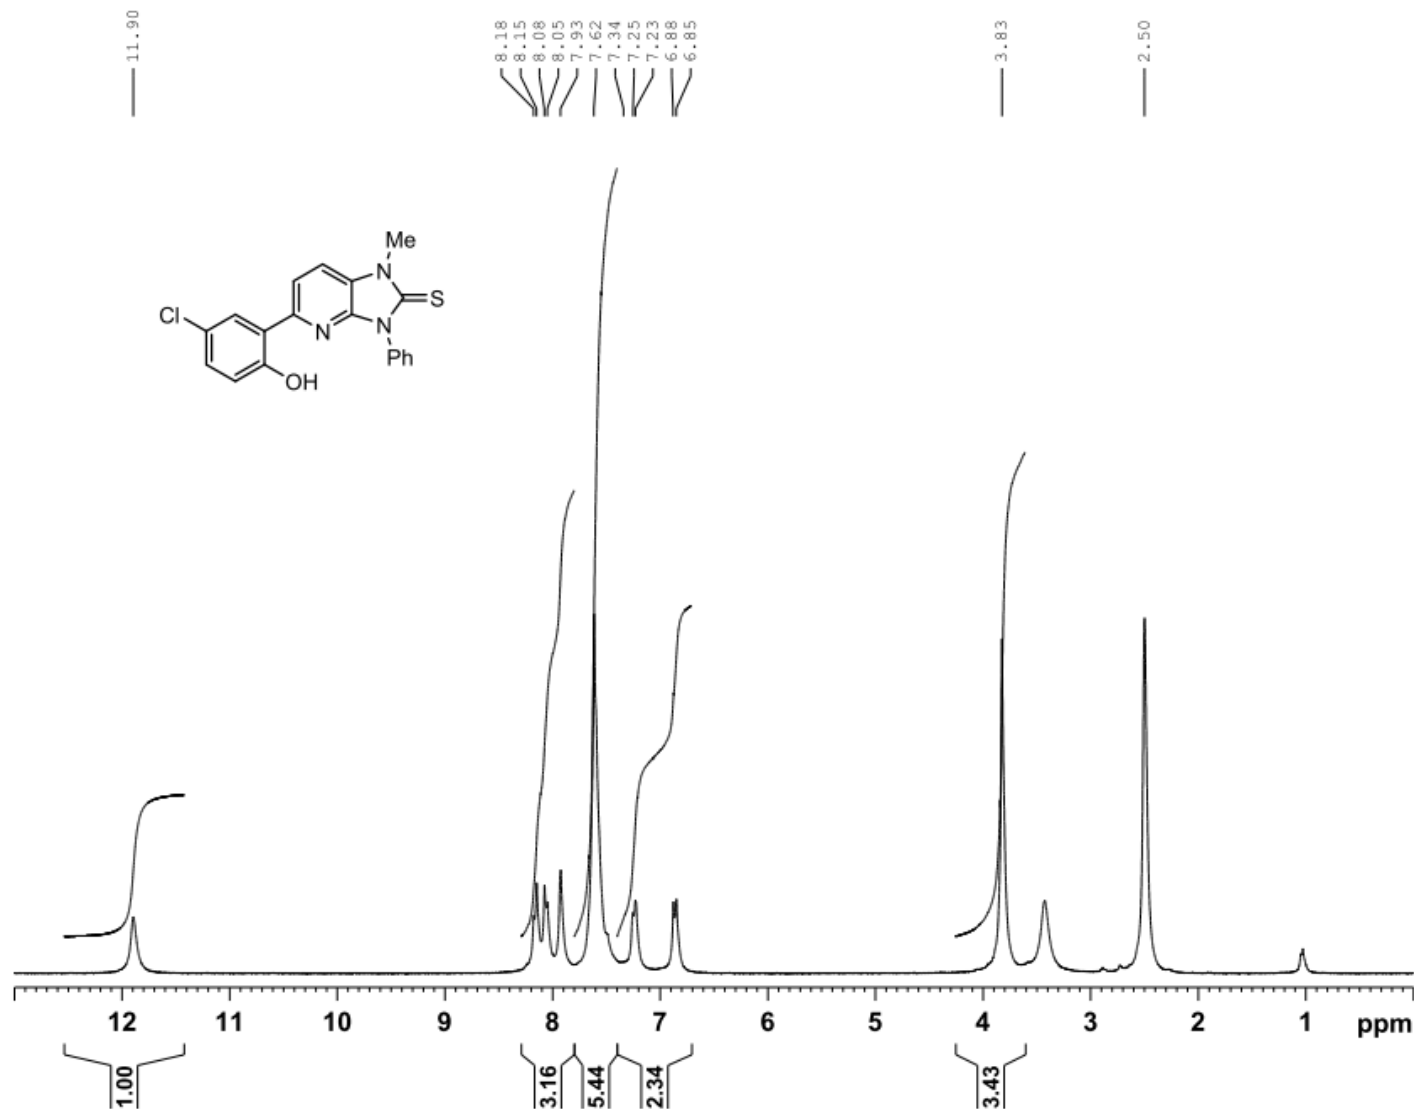

Current Data Parameters  
NAME 101209.u315 sm 379  
EXPNO 10  
PROCNO 1

F2 - Acquisition Parameters  
Date\_ 20101209  
Time 14.24  
INSTRUM spect  
PROBHD 5 mm PABBO BB-  
PULPROG zg30  
TD 65536  
SOLVENT DMSO  
NS 16  
DS 2  
SWH 6188.119 Hz  
FIDRES 0.094423 Hz  
AQ 5.2953587 sec  
RG 114  
DW 80.800 usec  
DE 10.00 usec  
TE 296.0 K  
D1 1.00000000 sec  
TD0 1

===== CHANNEL f1 =====  
NUC1 1H  
P1 10.00 usec  
PL1 0.00 dB  
PL1W 11.25325108 W  
SFO1 300.1318534 MHz

F2 - Processing parameters  
SI 32768  
SF 300.1300201 MHz  
WDW EM  
SSB 0  
LB 0.30 Hz  
GB 0  
PC 1.00

Mkrtchyan SM387 1H DMSO

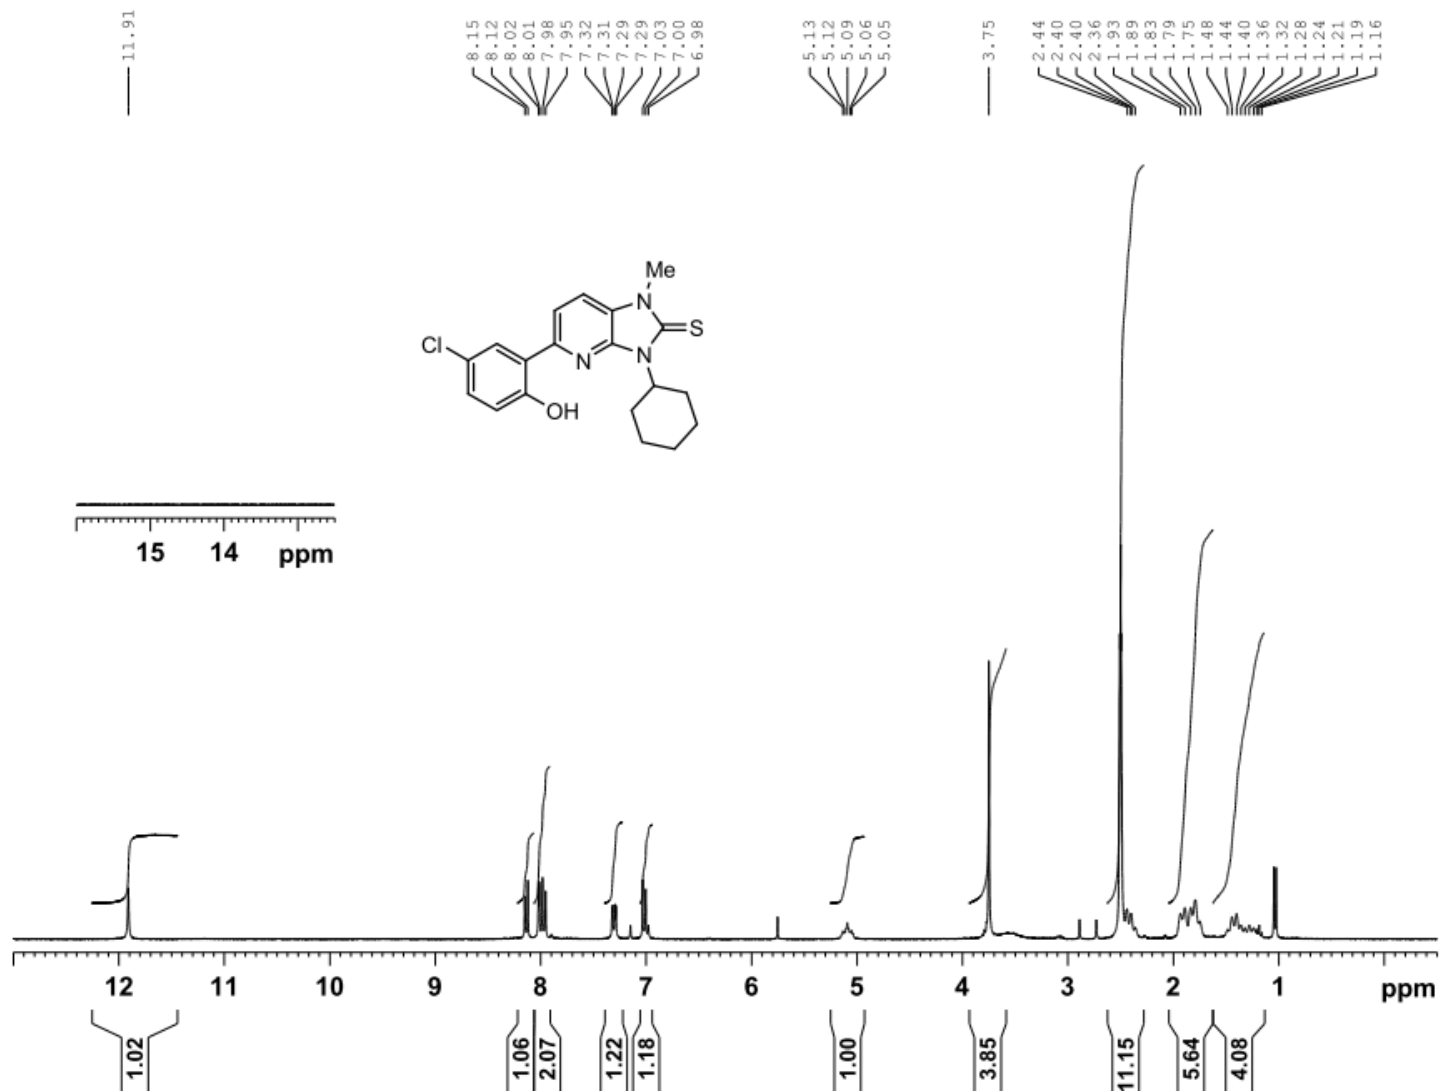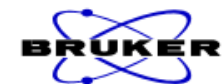

Current Data Parameters  
 NAME 101220.u318 sm 387  
 EXPNO 10  
 PROCNO 1

F2 - Acquisition Parameters  
 Date\_ 20101220  
 Time 12.54  
 INSTRUM spect  
 PROBHD 5 mm PABBO BB-  
 PULPROG zg30  
 TD 65536  
 SOLVENT DMSO  
 NS 16  
 DS 2  
 SWH 6188.119 Hz  
 FIDRES 0.094423 Hz  
 AQ 5.2953587 sec  
 RG 228  
 DW 80.800 usec  
 DE 10.00 usec  
 TE 298.2 K  
 D1 1.00000000 sec  
 TD0 1

===== CHANNEL f1 =====  
 NUC1 1H  
 P1 10.00 usec  
 PL1 0.00 dB  
 PL1W 11.25325108 W  
 SFO1 300.1318534 MHz

F2 - Processing parameters  
 SI 32768  
 SF 300.1300064 MHz  
 WDW EM  
 SSB 0  
 LB 0.30 Hz  
 GB 0  
 PC 1.00

Mkrtchyan SM387 13C DMSO

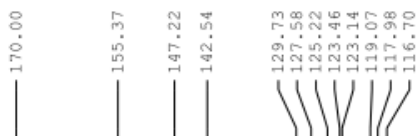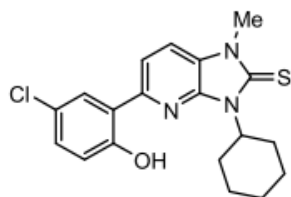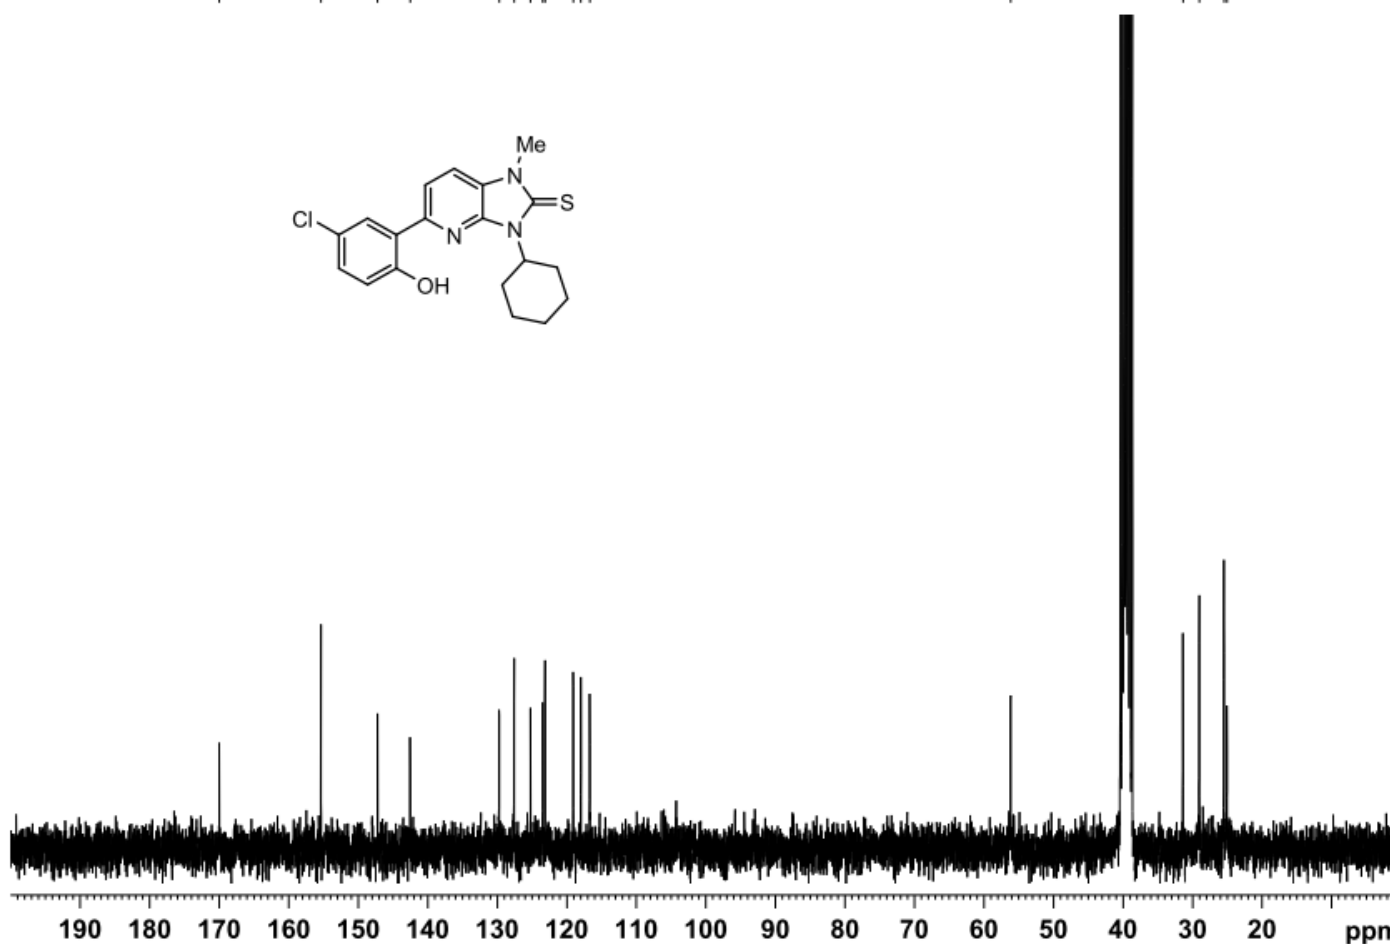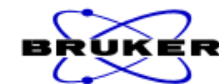

Current Data Parameters  
 NAME 101220.u318 sm 387  
 EXPNO 11  
 PROCNO 1

F2 - Acquisition Parameters  
 Date\_ 20101221  
 Time 1.43  
 INSTRUM spect  
 PROBHD 5 mm PABBO BB-  
 PULPROG zgpg30  
 TD 65536  
 SOLVENT DMSO  
 NS 1024  
 DS 4  
 SWH 18028.846 Hz  
 FIDRES 0.275098 Hz  
 AQ 1.8175818 sec  
 RG 2050  
 DW 27.733 usec  
 DE 10.00 usec  
 TE 298.2 K  
 D1 2.00000000 sec  
 D11 0.03000000 sec  
 TD0 1

===== CHANNEL f1 =====  
 NUC1 13C  
 P1 10.00 usec  
 PL1 -0.50 dB  
 PL1W 33.25691986 W  
 SFO1 75.4752953 MHz

===== CHANNEL f2 =====  
 CPDPRG2 waltz16  
 NUC2 1H  
 PCPD2 72.00 usec  
 PL2 0.00 dB  
 PL12 17.00 dB  
 PL13 17.00 dB  
 PL2W 11.25325108 W  
 PL12W 0.22453187 W  
 PL13W 0.22453187 W  
 SFO2 300.1312005 MHz

F2 - Processing parameters  
 SI 32768  
 SF 75.4677876 MHz  
 WDW EM  
 SSB 0  
 LB 1.00 Hz  
 GB 0  
 PC 1.40

Mkrtchyan SM383 1H DMSO

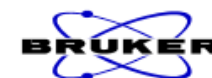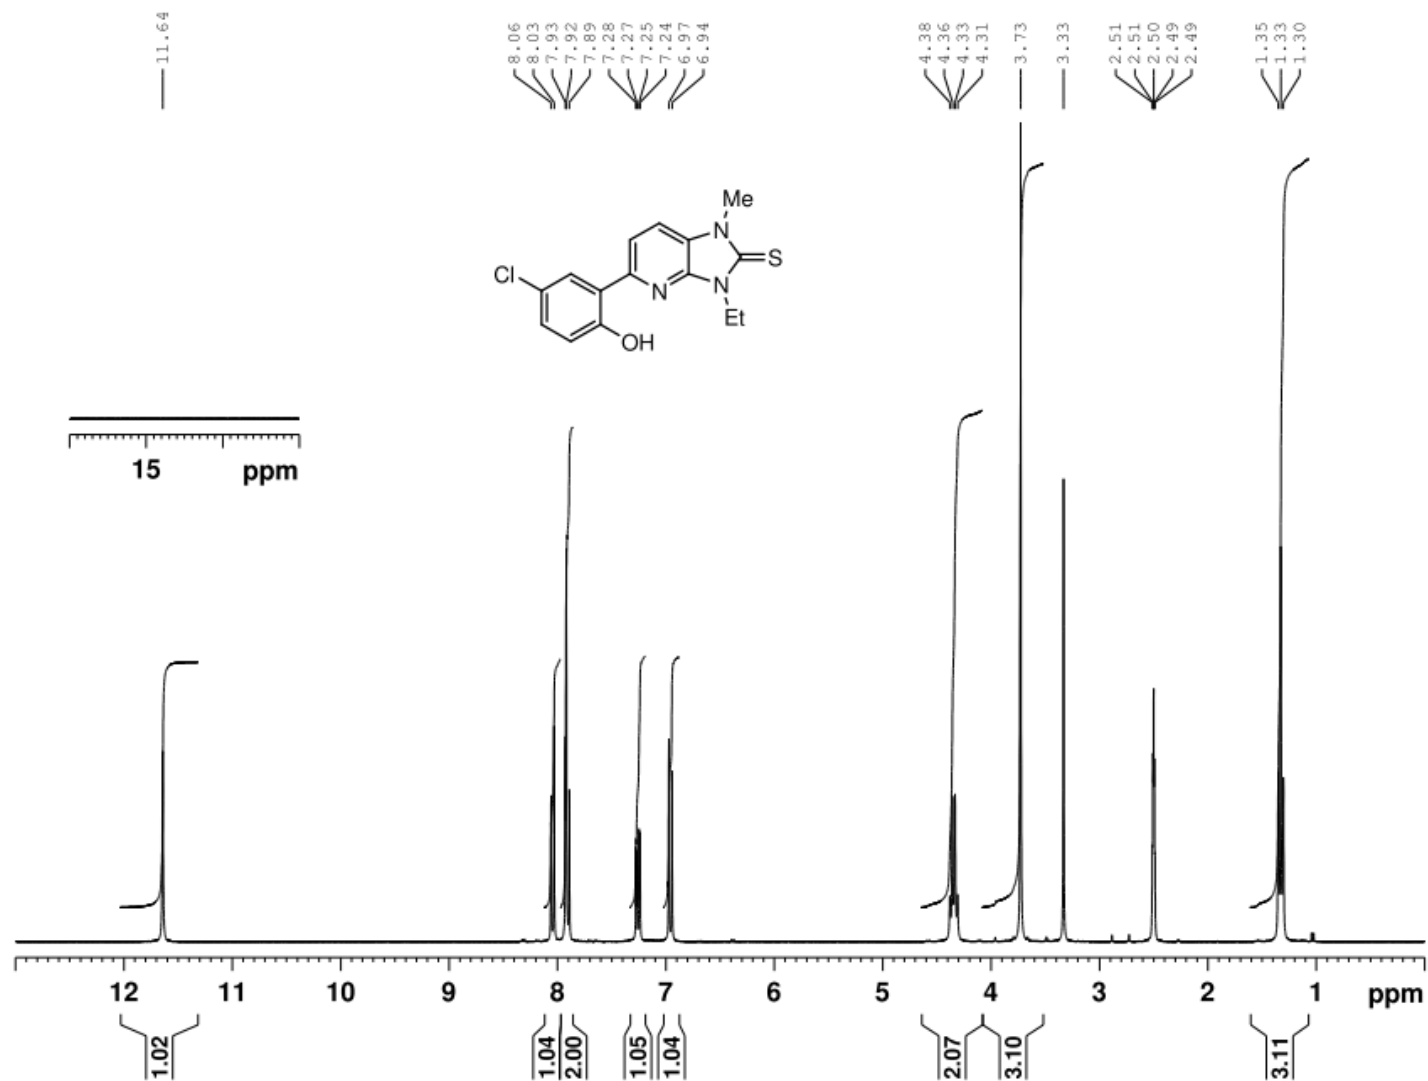

NAME 101214.u317  
EXPNO 10  
PROCNO 1  
Date\_ 20101214  
Time 10.33  
INSTRUM spect  
PROBHD 5 mm PABBO BB-  
PULPROG zg30  
TD 65536  
SOLVENT DMSO  
NS 16  
DS 2  
SWH 6188.119 Hz  
FIDRES 0.094423 Hz  
AQ 5.2953587 sec  
RG 128  
DW 80.800 usec  
DE 10.00 usec  
TE 298.2 K  
D1 1.0000000 sec  
TD0 1

----- CHANNEL f1 -----  
NUC1 1H  
P1 10.00 usec  
PL1 0.00 dB  
PL1W 11.25325108 W  
SFO1 300.1318534 MHz  
SI 32768  
SF 300.1300056 MHz  
WDW EM  
SSB 0  
LB 0.30 Hz  
GB 0  
PC 1.00

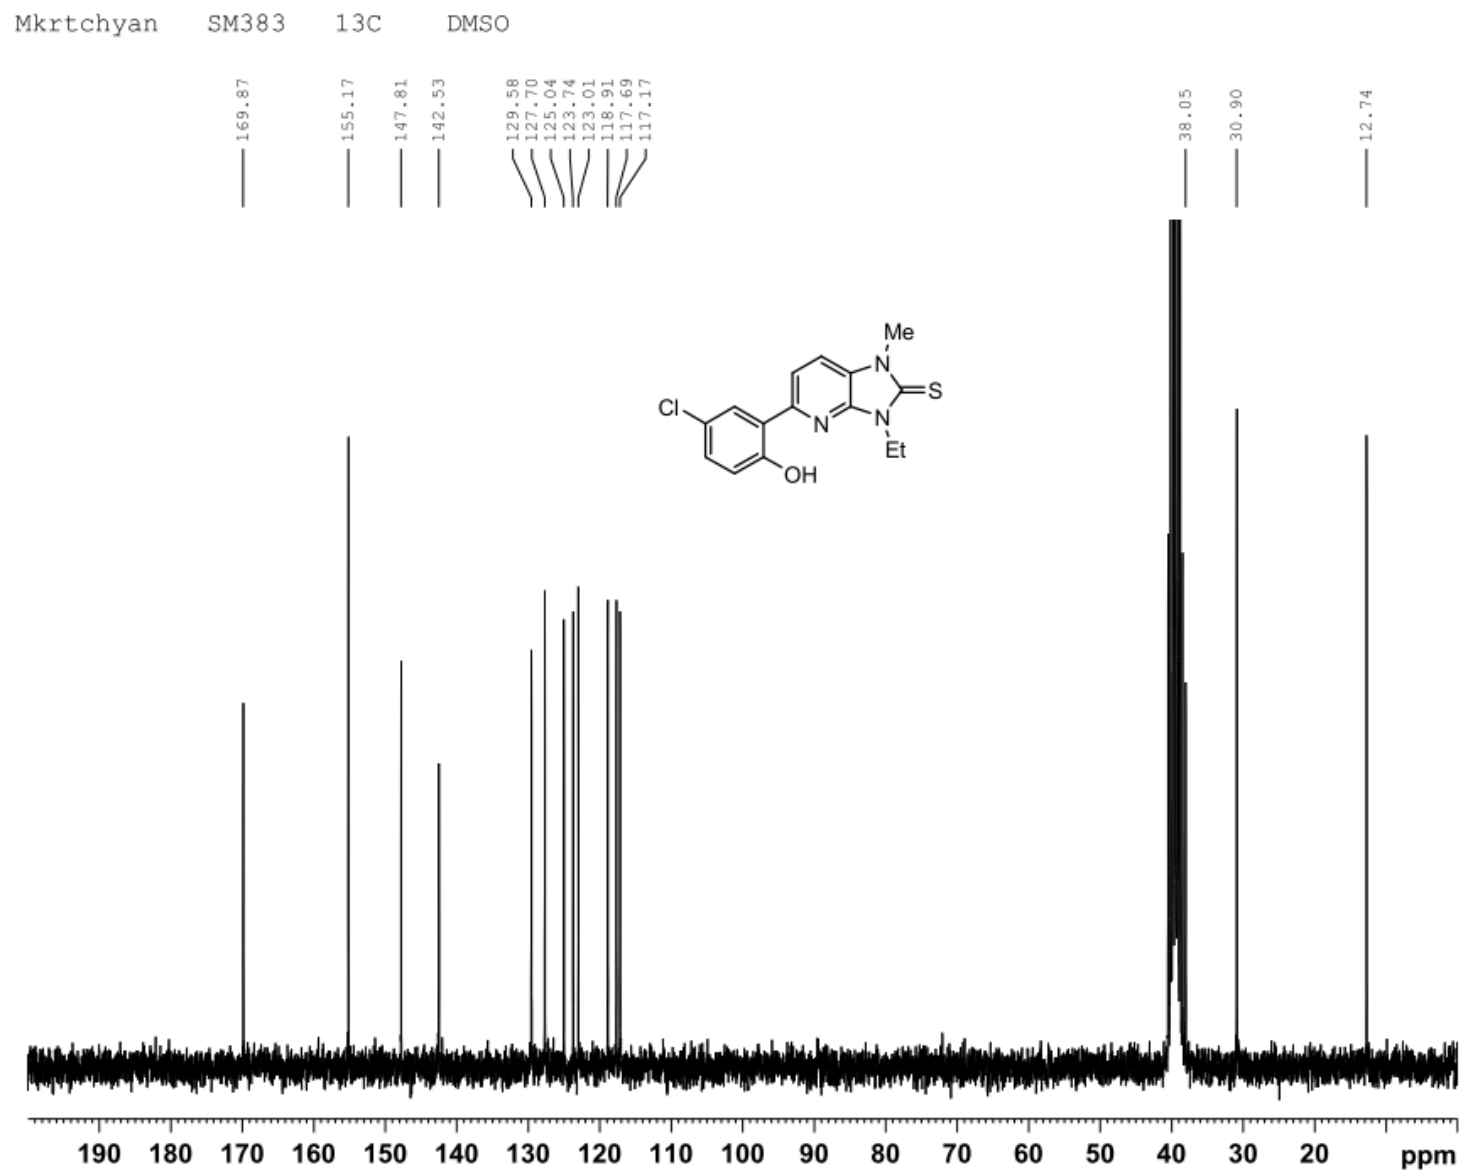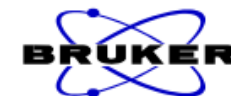

Current Data Parameters  
NAME 101214.211 sm 383 C  
EXPNO 10  
PROCNO 1

F2 - Acquisition Parameters  
Date\_ 20101215  
Time 1.32  
INSTRUM spect  
PROBHD 5 mm PABBO BB-  
PULPROG zgpg30  
TD 65536  
SOLVENT DMSO  
NS 1024  
DS 4  
SWH 15000.000 Hz  
FIDRES 0.228882 Hz  
AQ 2.1845834 sec  
RG 1290  
DW 33.333 usec  
DE 10.00 usec  
TE 297.9 K  
D1 2.0000000 sec  
d11 0.0300000 sec  
DELTA 1.8999998 sec  
TD0 1

===== CHANNEL f1 =====  
NUC1 13C  
P1 10.00 usec  
PL1 -1.00 dB  
SFO1 62.9015280 MHz

===== CHANNEL f2 =====  
CPDPRG2 waltz16  
NUC2 1H  
PCPD2 70.00 usec  
PL12 15.00 dB  
PL13 15.00 dB  
PL2 -2.50 dB  
SFO2 250.1310005 MHz

F2 - Processing parameters  
SI 32768  
SF 62.8952697 MHz  
WDW EM  
SSB 0  
LB 1.00 Hz  
GB 0  
PC 1.40

Mkrtchyan SM389 1H DMSO

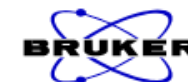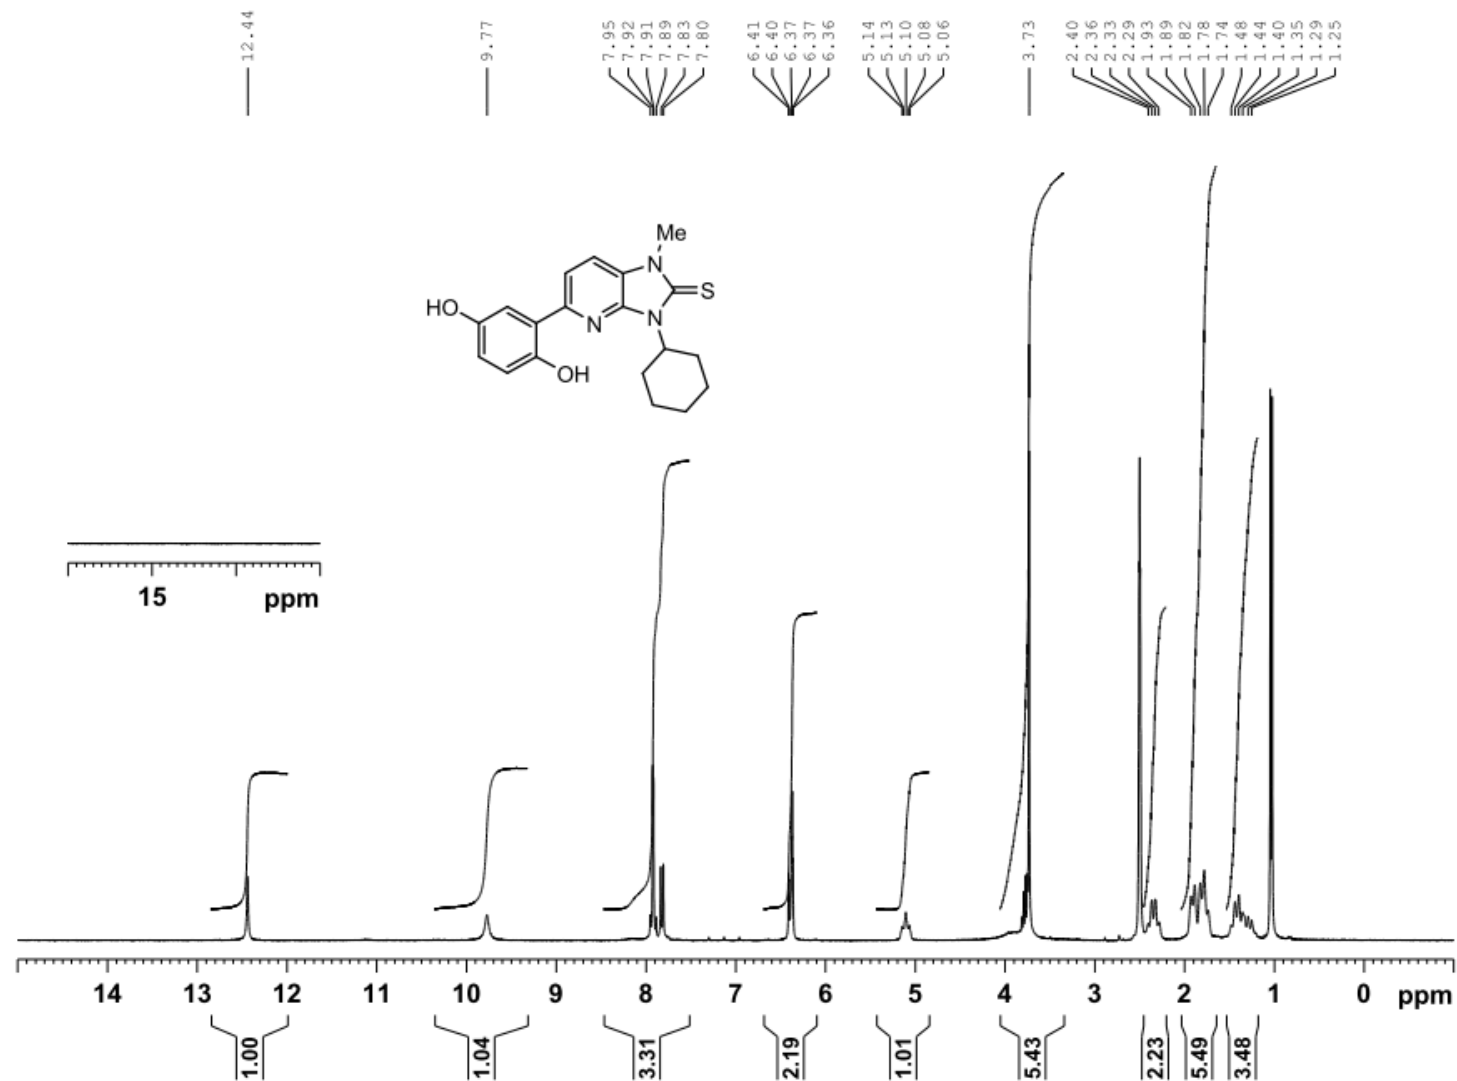

Current Data Parameters  
 NAME 101220.u320 sm 389  
 EXPNO 10  
 PROCNO 1

F2 - Acquisition Parameters  
 Date\_ 20101220  
 Time 13.04  
 INSTRUM spect  
 PROBHD 5 mm PABBO BB-  
 PULPROG zg30  
 TD 65536  
 SOLVENT DMSO  
 NS 16  
 DS 2  
 SWH 6188.119 Hz  
 FIDRES 0.094423 Hz  
 AQ 5.2953587 sec  
 RG 181  
 DW 80.800 usec  
 DE 10.00 usec  
 TE 298.2 K  
 D1 1.00000000 sec  
 TD0 1

CHANNEL f1  
 NUC1 1H  
 P1 10.00 usec  
 PL1 0.00 dB  
 PL1W 11.25325108 W  
 SFO1 300.1318534 MHz

F2 - Processing parameters  
 SI 32768  
 SF 300.1300063 MHz  
 WDW EM  
 SSB 0  
 LB 0.30 Hz  
 GB 0  
 PC 1.00



Mkrtchyan SM389 13C DMSO

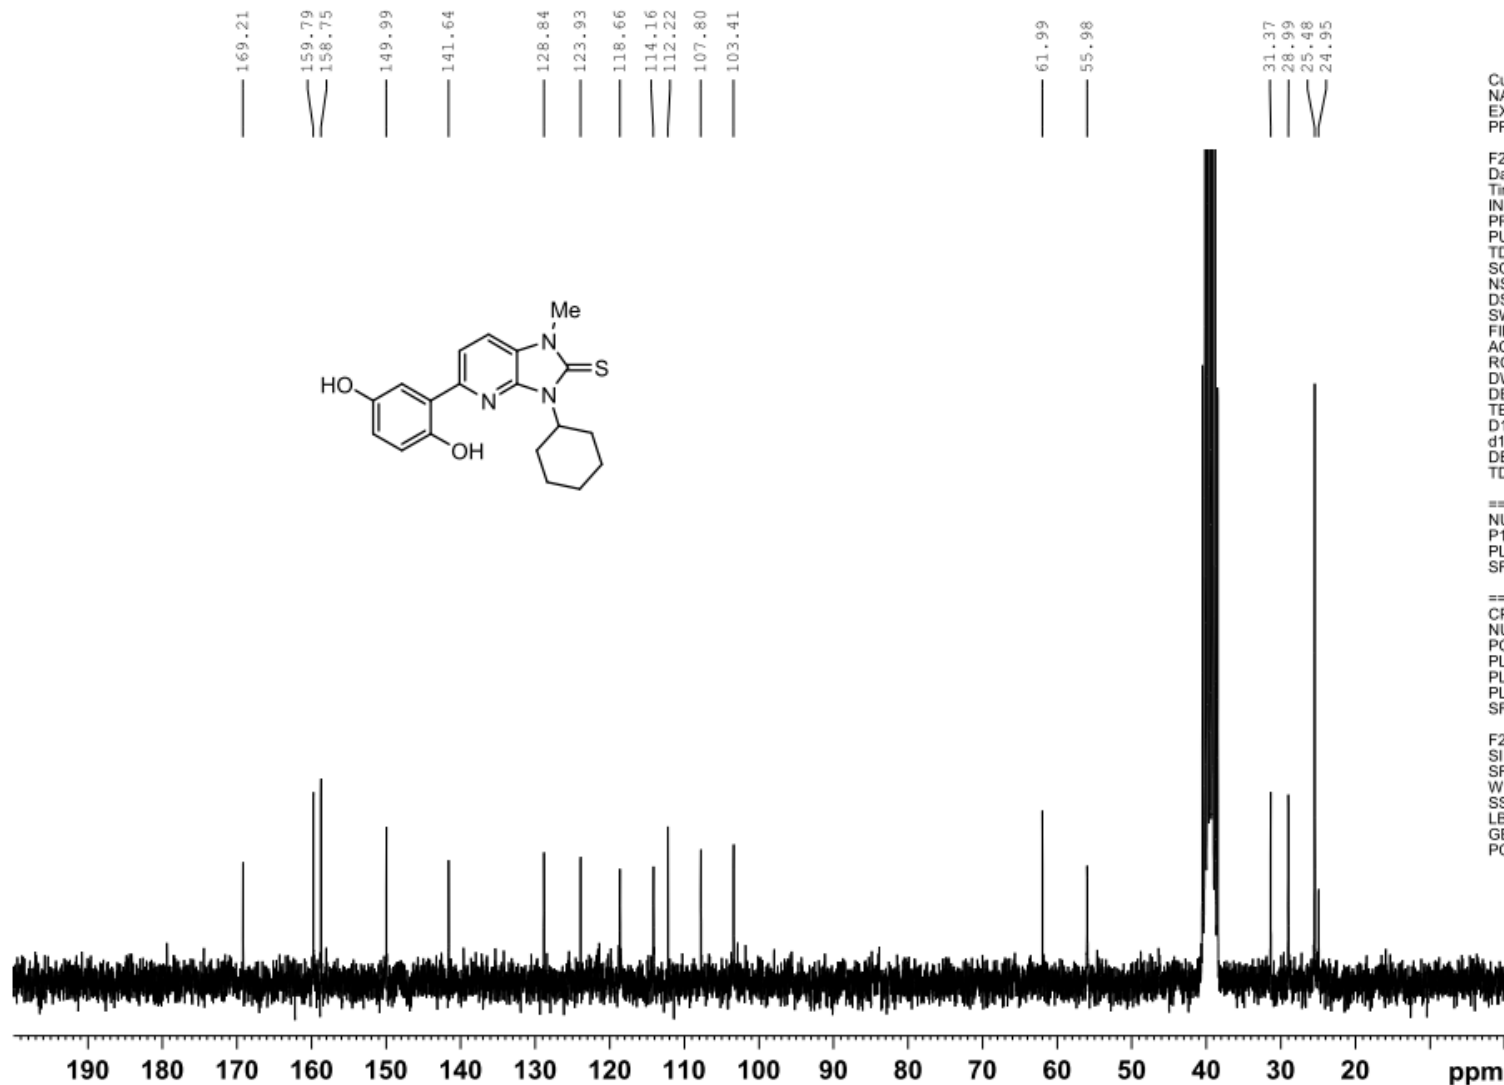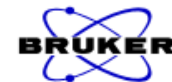

Current Data Parameters  
NAME 101221.211 sm 389 C  
EXPNO 10  
PROCNO 1

F2 - Acquisition Parameters  
Date\_ 20101221  
Time 22.16  
INSTRUM spect  
PROBHD 5 mm PABBO BB-  
PULPROG zgpg30  
TD 65536  
SOLVENT DMSO  
NS 1024  
DS 4  
SWH 15000.000 Hz  
FIDRES 0.228862 Hz  
AQ 2.1845834 sec  
RG 2050  
DW 33.333 usec  
DE 10.00 usec  
TE 295.9 K  
D1 2.0000000 sec  
d11 0.0300000 sec  
DELTA 1.89999998 sec  
TD0 1

===== CHANNEL f1 =====  
NUC1 13C  
P1 10.00 usec  
PL1 -1.00 dB  
SFO1 62.9015280 MHz

===== CHANNEL f2 =====  
CPDPRG2 waltz16  
NUC2 1H  
PCPD2 70.00 usec  
PL12 15.00 dB  
PL13 15.00 dB  
PL2 -2.50 dB  
SFO2 250.1310005 MHz

F2 - Processing parameters  
SI 32768  
SF 62.8952683 MHz  
WDW EM  
SSB 0  
LB 1.00 Hz  
GB 0  
PC 1.40

Gevorgyan AG164 1H DMSO

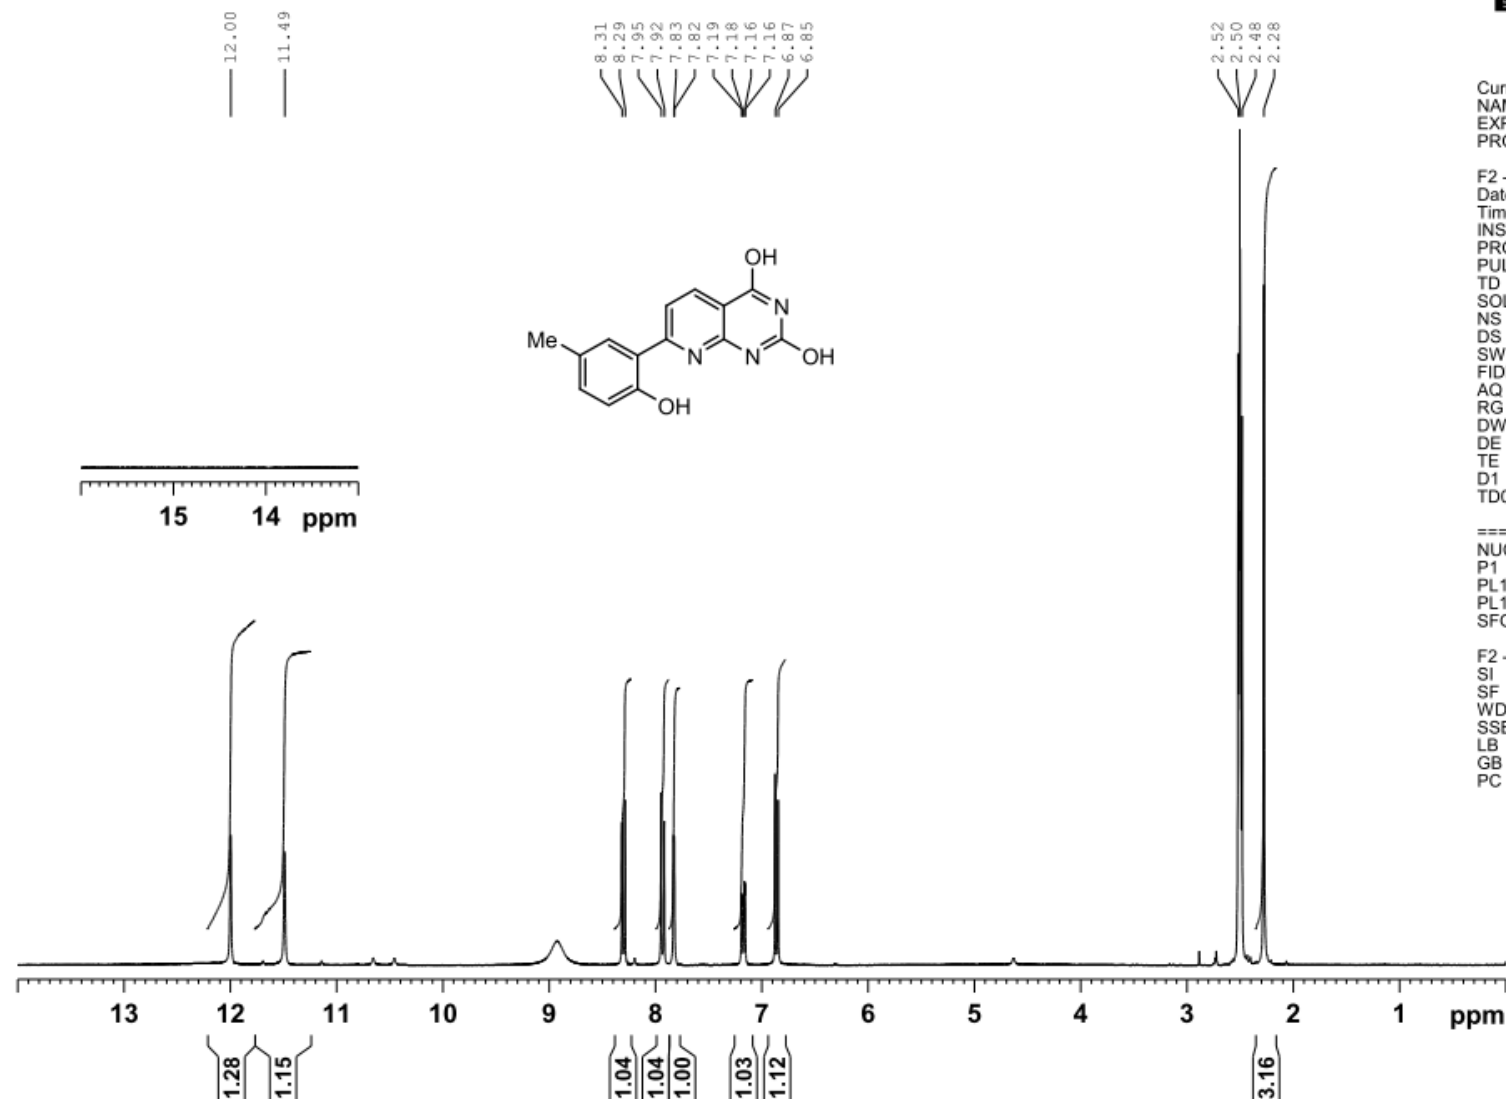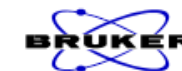

Current Data Parameters  
NAME 110131.u325 ag 164  
EXPNO 10  
PROCNO 1

F2 - Acquisition Parameters  
Date\_ 20110131  
Time 11.44  
INSTRUM spect  
PROBHD 5 mm PABBO BB-  
PULPROG zg30  
TD 65536  
SOLVENT DMSO  
NS 16  
DS 2  
SWH 6188.119 Hz  
FIDRES 0.094423 Hz  
AQ 5.2953587 sec  
RG 90.5  
DW 80.800 usec  
DE 10.00 usec  
TE 298.2 K  
D1 1.00000000 sec  
TD0 1

===== CHANNEL f1 =====  
NUC1 1H  
P1 10.00 usec  
PL1 0.00 dB  
PL1W 11.25325108 W  
SFO1 300.1318534 MHz

F2 - Processing parameters  
SI 32768  
SF 300.1300041 MHz  
WDW EM  
SSB 0  
LB 0.30 Hz  
GB 0  
PC 1.00

Gevorgyan AG164 13C DMSO

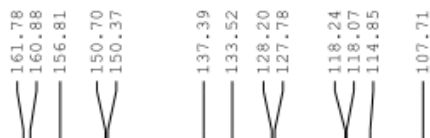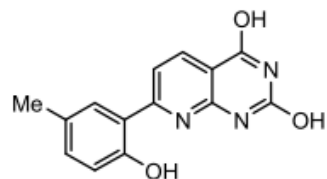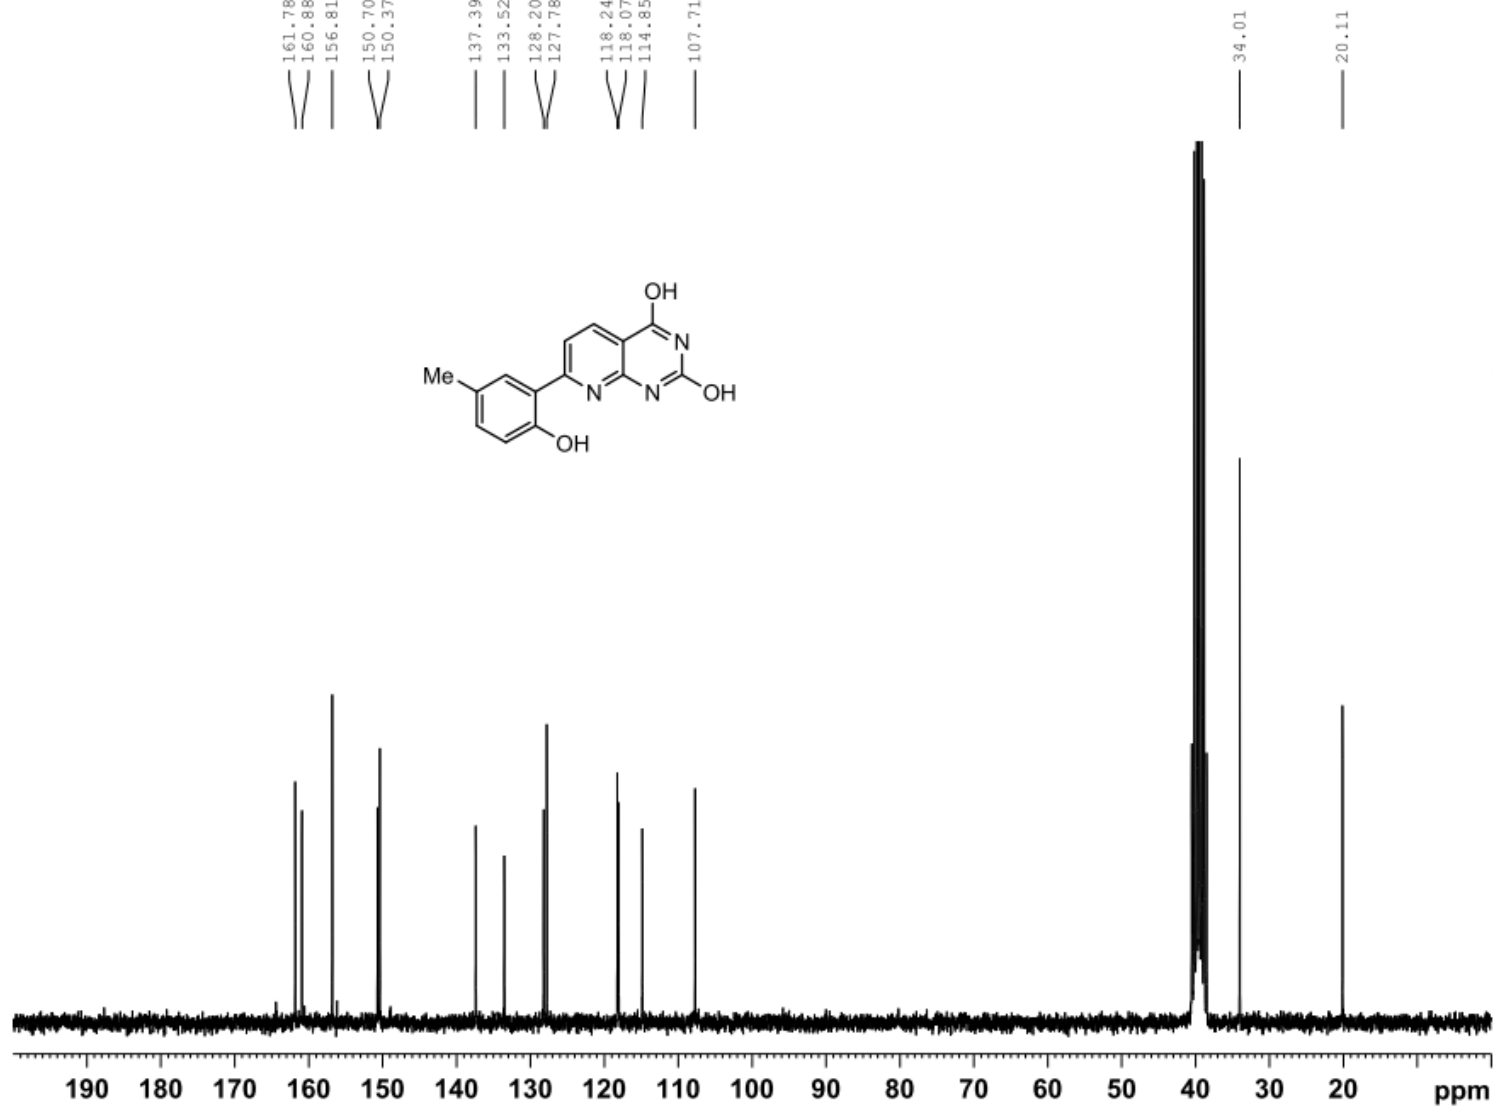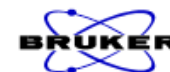

Current Data Parameters  
NAME 110202.204 ag 164 C  
EXPNO 10  
PROCNO 1

F2 - Acquisition Parameters  
Date\_ 20110202  
Time 19.56  
INSTRUM spect  
PROBHD 5 mm PABBO BB-  
PULPROG zgpg30  
TD 65536  
SOLVENT DMSO  
NS 1024  
DS 4  
SWH 15000.000 Hz  
FIDRES 0.228882 Hz  
AQ 2.1845834 sec  
RG 2050  
DW 33.333 usec  
DE 10.00 usec  
TE 298.1 K  
D1 2.00000000 sec  
d11 0.03000000 sec  
DELTA 1.89999998 sec  
TD0 1

===== CHANNEL f1 =====  
NUC1 13C  
P1 10.00 usec  
PL1 -1.00 dB  
SFO1 62.9015280 MHz

===== CHANNEL f2 =====  
CPDPRG2 waltz16  
NUC2 1H  
PCPD2 70.00 usec  
PL12 15.00 dB  
PL13 15.00 dB  
PL2 -2.50 dB  
SFO2 250.1310005 MHz

F2 - Processing parameters  
SI 32768  
SF 62.8952678 MHz  
WDW EM  
SSB 0  
LB 1.00 Hz  
GB 0  
PC 1.40

Gevorgyan AG168 1H DMSO

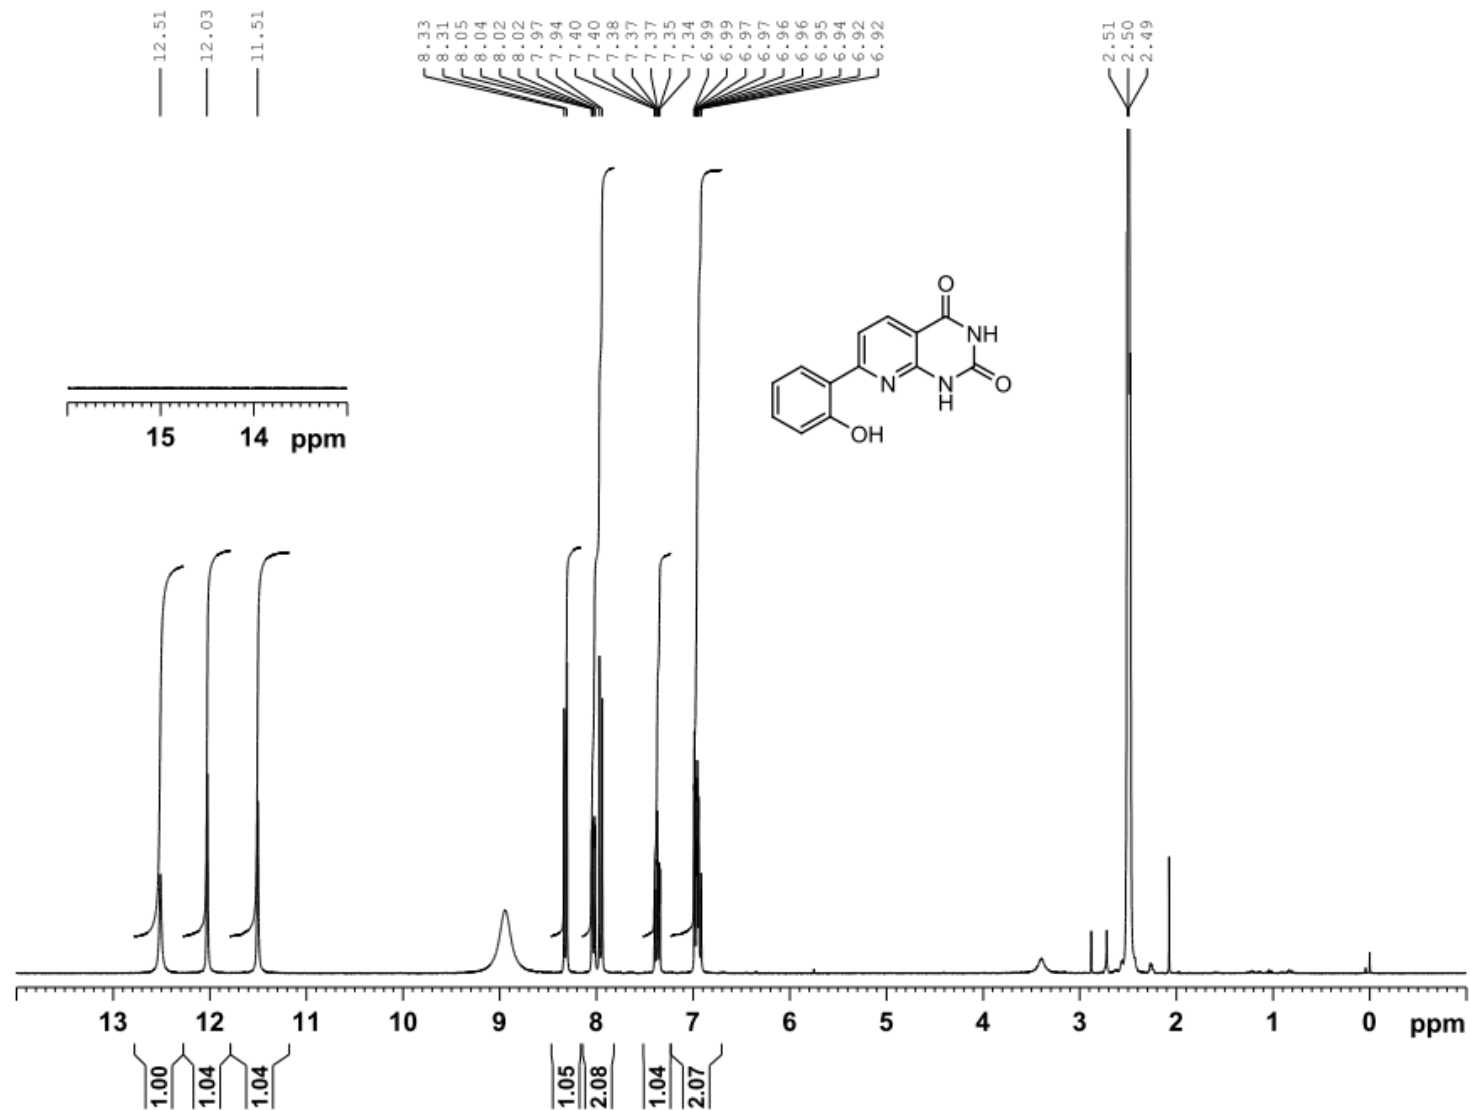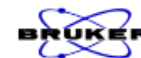

Current Data Parameters  
NAME 110131.u328 ag 168  
EXPNO 10  
PROCNO 1

F2 - Acquisition Parameters  
Date\_ 20110131  
Time 11.59  
INSTRUM spect  
PROBHD 5 mm PABBO BB-  
PULPROG zg30  
TD 65536  
SOLVENT DMSO  
NS 16  
DS 2  
SWH 6188.119 Hz  
FIDRES 0.094423 Hz  
AQ 5.2953587 sec  
RG 101  
DW 80.800 usec  
DE 10.00 usec  
TE 298.2 K  
D1 1.0000000 sec  
TD0 1

===== CHANNEL f1 =====  
NUC1 1H  
P1 10.00 usec  
PL1 0.00 dB  
PL1W 11.25325108 W  
SFO1 300.1318534 MHz

F2 - Processing parameters  
SI 32768  
SF 300.1300048 MHz  
WDW EM  
SSB 0  
LB 0.30 Hz  
GB 0  
PC 1.00

Gevorgyan AG168 (A) 13C DMSO

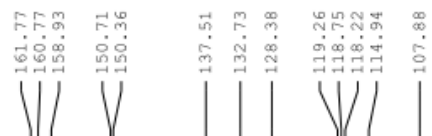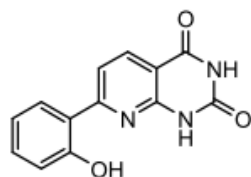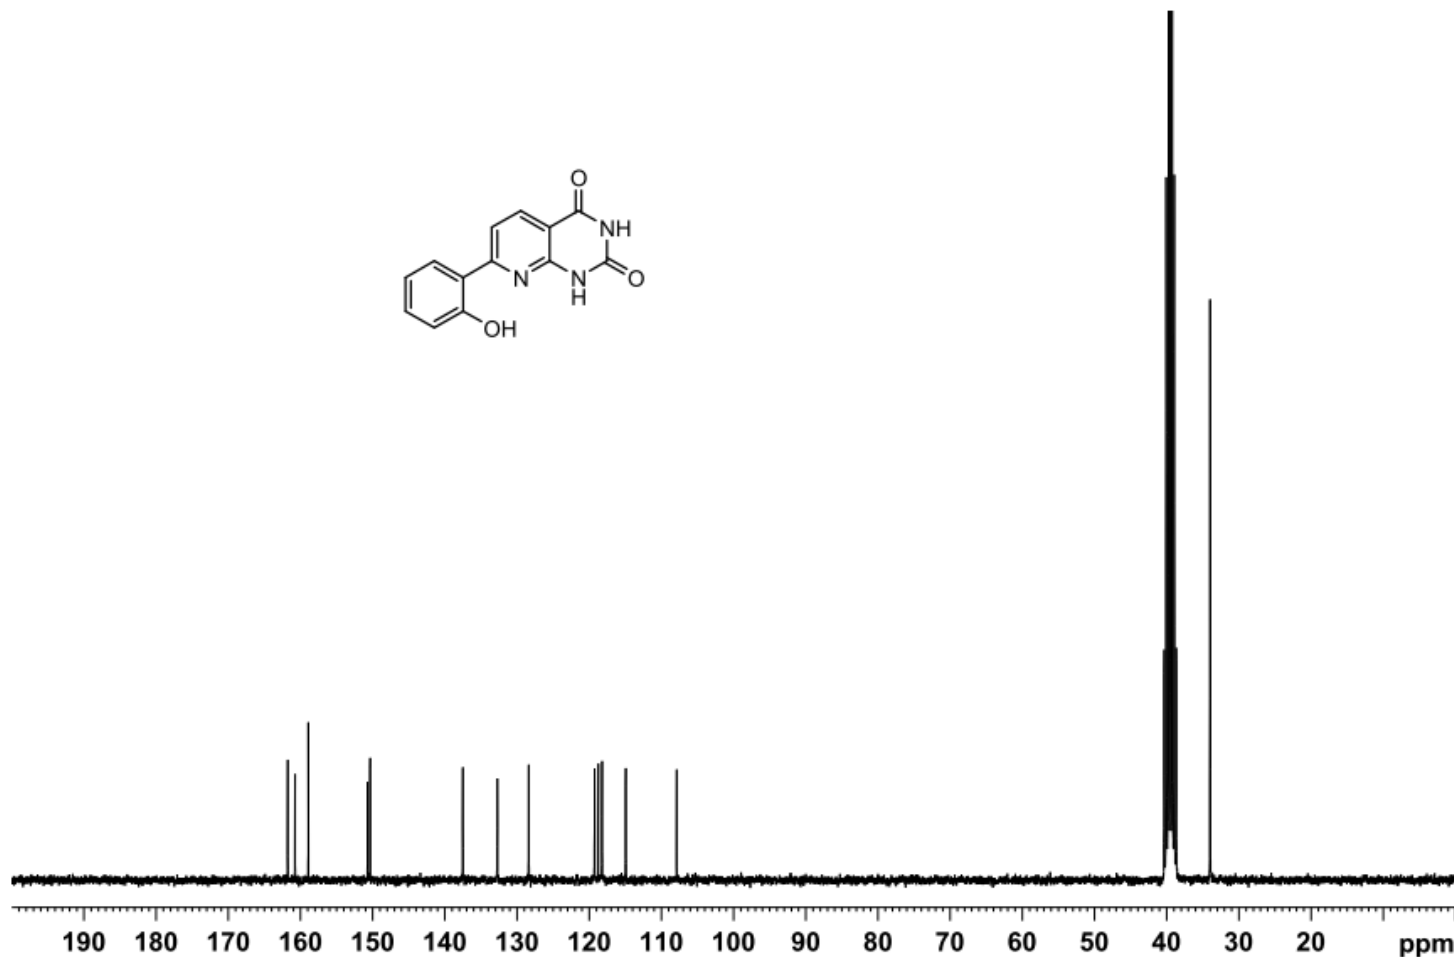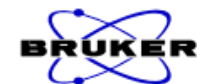

Current Data Parameters  
NAME 110324.u336 ag 168 C  
EXPNO 10  
PROCNO 1

F2 - Acquisition Parameters  
Date\_ 20110325  
Time 4.41  
INSTRUM spect  
PROBHD 5 mm PABBO BB-  
PULPROG zgpg30  
TD 65536  
SOLVENT DMSO  
NS 1600  
DS 4  
SWH 18028.846 Hz  
FIDRES 0.275098 Hz  
AQ 1.8175818 sec  
RG 2050  
DW 27.733 usec  
DE 10.00 usec  
TE 298.2 K  
D1 2.00000000 sec  
D11 0.03000000 sec  
TD0 1

===== CHANNEL f1 =====  
NUC1 13C  
P1 10.00 usec  
PL1 -0.50 dB  
PL1W 33.25691986 W  
SFO1 75.4752953 MHz

===== CHANNEL f2 =====  
CPDPRG2 waltz16  
NUC2 1H  
PCPD2 72.00 usec  
PL2 0.00 dB  
PL12 17.00 dB  
PL13 17.00 dB  
PL2W 11.25325108 W  
PL12W 0.22453187 W  
PL13W 0.22453187 W  
SFO2 300.1312005 MHz

F2 - Processing parameters  
SI 32768  
SF 75.4677865 MHz  
WDW EM  
SSB 0  
LB 1.00 Hz  
GB 0  
PC 1.40

Gevorgyan, AG 146, DMSO, 1H

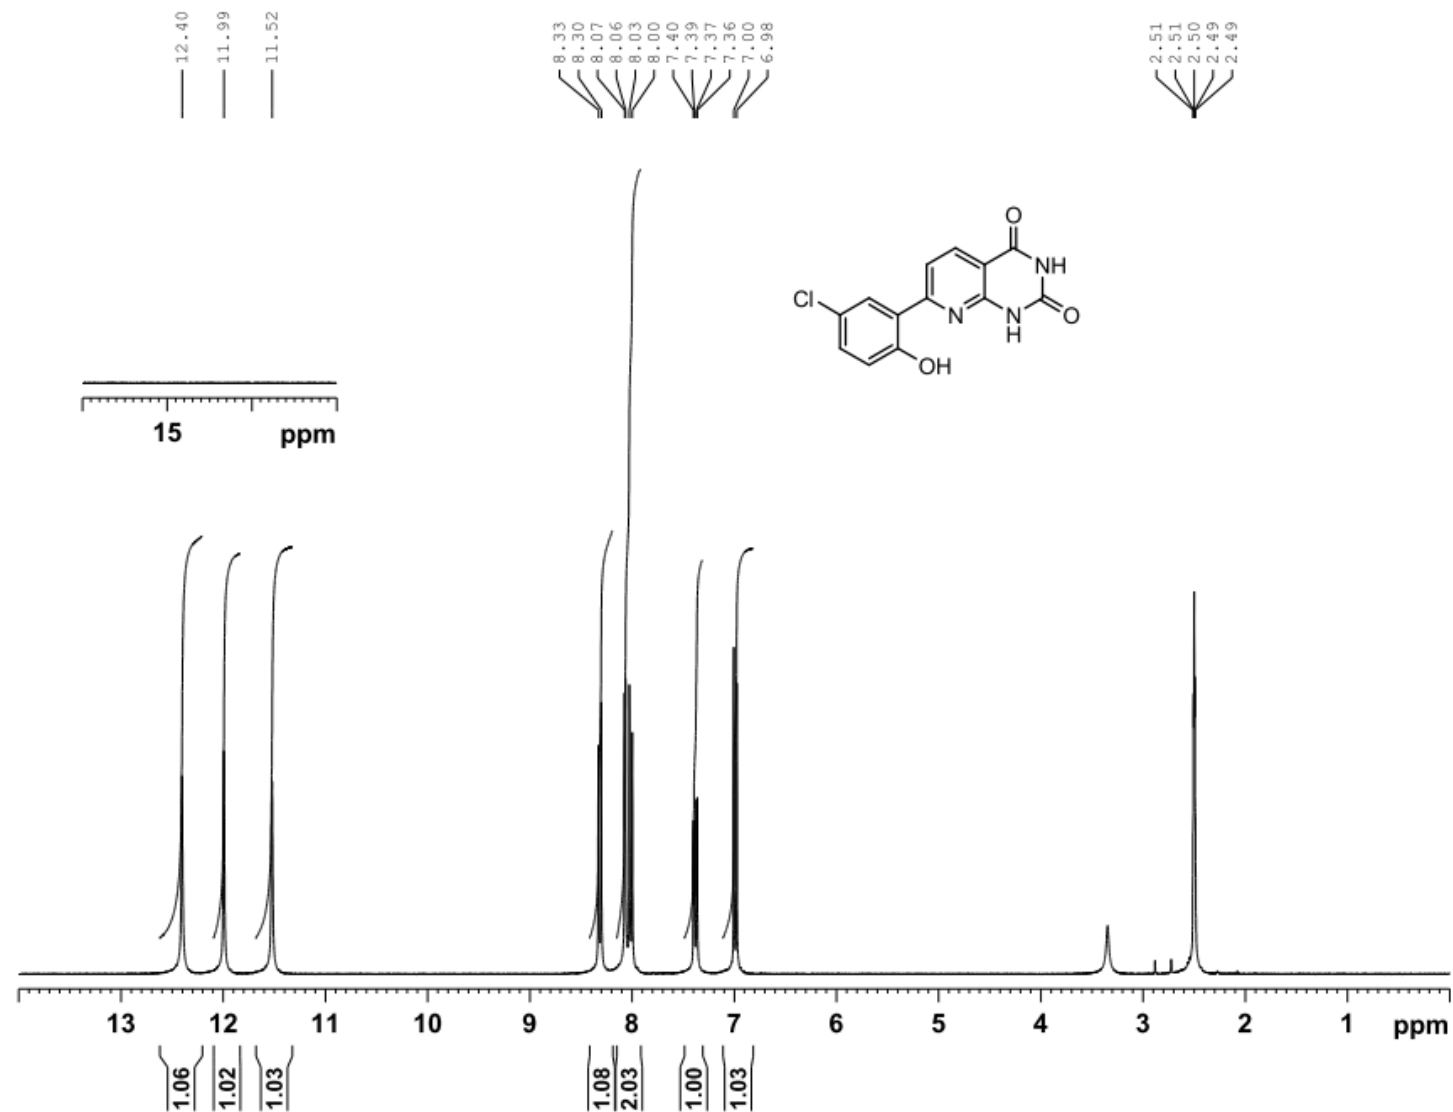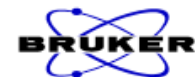

Current Data Parameters  
NAME 110114.u302 ag 146  
EXPNO 10  
PROCNO 1

F2 - Acquisition Parameters  
Date\_ 20110114  
Time 8.57  
INSTRUM spect  
PROBHD 5 mm PABBO BB-  
PULPROG zg30  
TD 65536  
SOLVENT DMSO  
NS 16  
DS 2  
SWH 6188.119 Hz  
FIDRES 0.094423 Hz  
AQ 5.2953587 sec  
RG 161  
DW 80.800 usec  
DE 10.00 usec  
TE 298.2 K  
D1 1.0000000 sec  
TD0 1

===== CHANNEL f1 =====  
NUC1 1H  
P1 10.00 usec  
PL1 0.00 dB  
PL1W 11.25325108 W  
SFO1 300.1318534 MHz

F2 - Processing parameters  
SI 32768  
SF 300.1300077 MHz  
WDW EM  
SSB 0  
LB 0.30 Hz  
GB 0  
PC 1.00

Gevorgyan AG146 13C DMSO

161.72  
159.10  
157.41  
150.79  
150.33  
137.60  
132.06  
127.76  
122.98  
120.60  
119.95  
115.68  
108.48

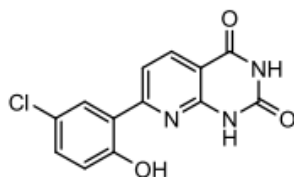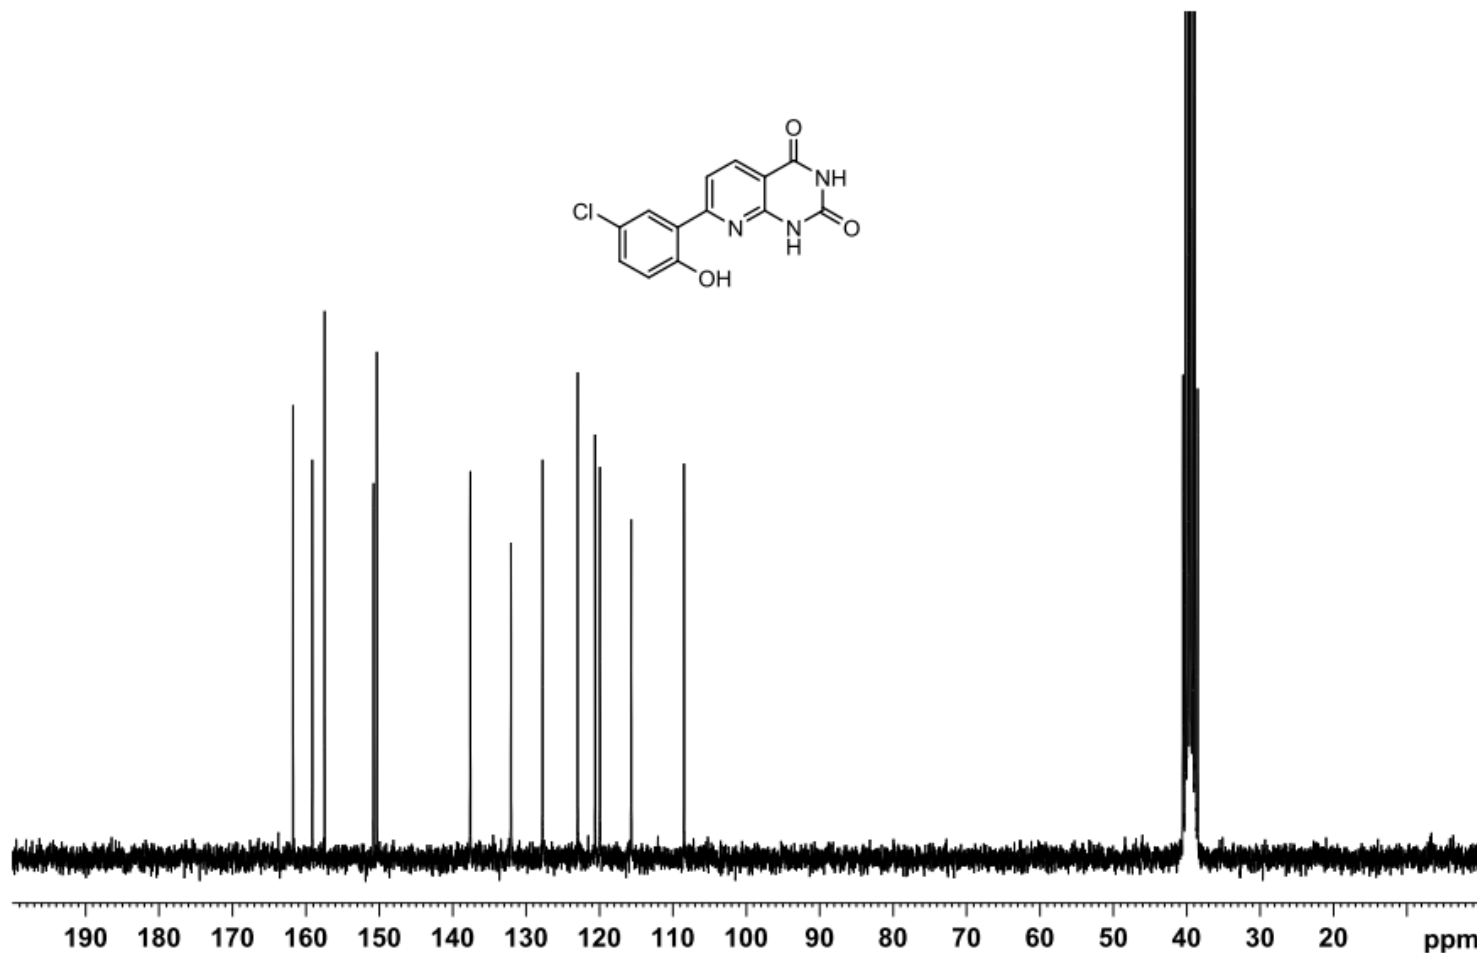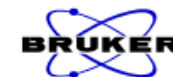

Current Data Parameters  
NAME 110117.213 ag 146 C  
EXPNO 10  
PROCNO 1

F2 - Acquisition Parameters  
Date\_ 20110118  
Time 7.09  
INSTRUM spect  
PROBHD 5 mm PABBO BB-  
PULPROG zgpg30  
TD 65536  
SOLVENT DMSO  
NS 1600  
DS 4  
SWH 15000.000 Hz  
FIDRES 0.22882 Hz  
AQ 2.1845834 sec  
RG 2050  
DW 33.333 usec  
DE 10.00 usec  
TE 297.9 K  
D1 2.00000000 sec  
d11 0.03000000 sec  
DELTA 1.89999998 sec  
TD0 1

===== CHANNEL f1 =====  
NUC1 13C  
P1 10.00 usec  
PL1 -1.00 dB  
SFO1 62.9015280 MHz

===== CHANNEL f2 =====  
CPDPRG2 waltz16  
NUC2 1H  
PCPD2 70.00 usec  
PL12 15.00 dB  
PL13 15.00 dB  
PL2 -2.50 dB  
SFO2 250.1310005 MHz

F2 - Processing parameters  
SI 32768  
SF 62.8952683 MHz  
WDW EM  
SSB 0  
LB 1.00 Hz  
GB 0  
PC 1.40

Gevorgyan AG 161 1H DMSO 80 grd/C

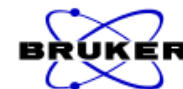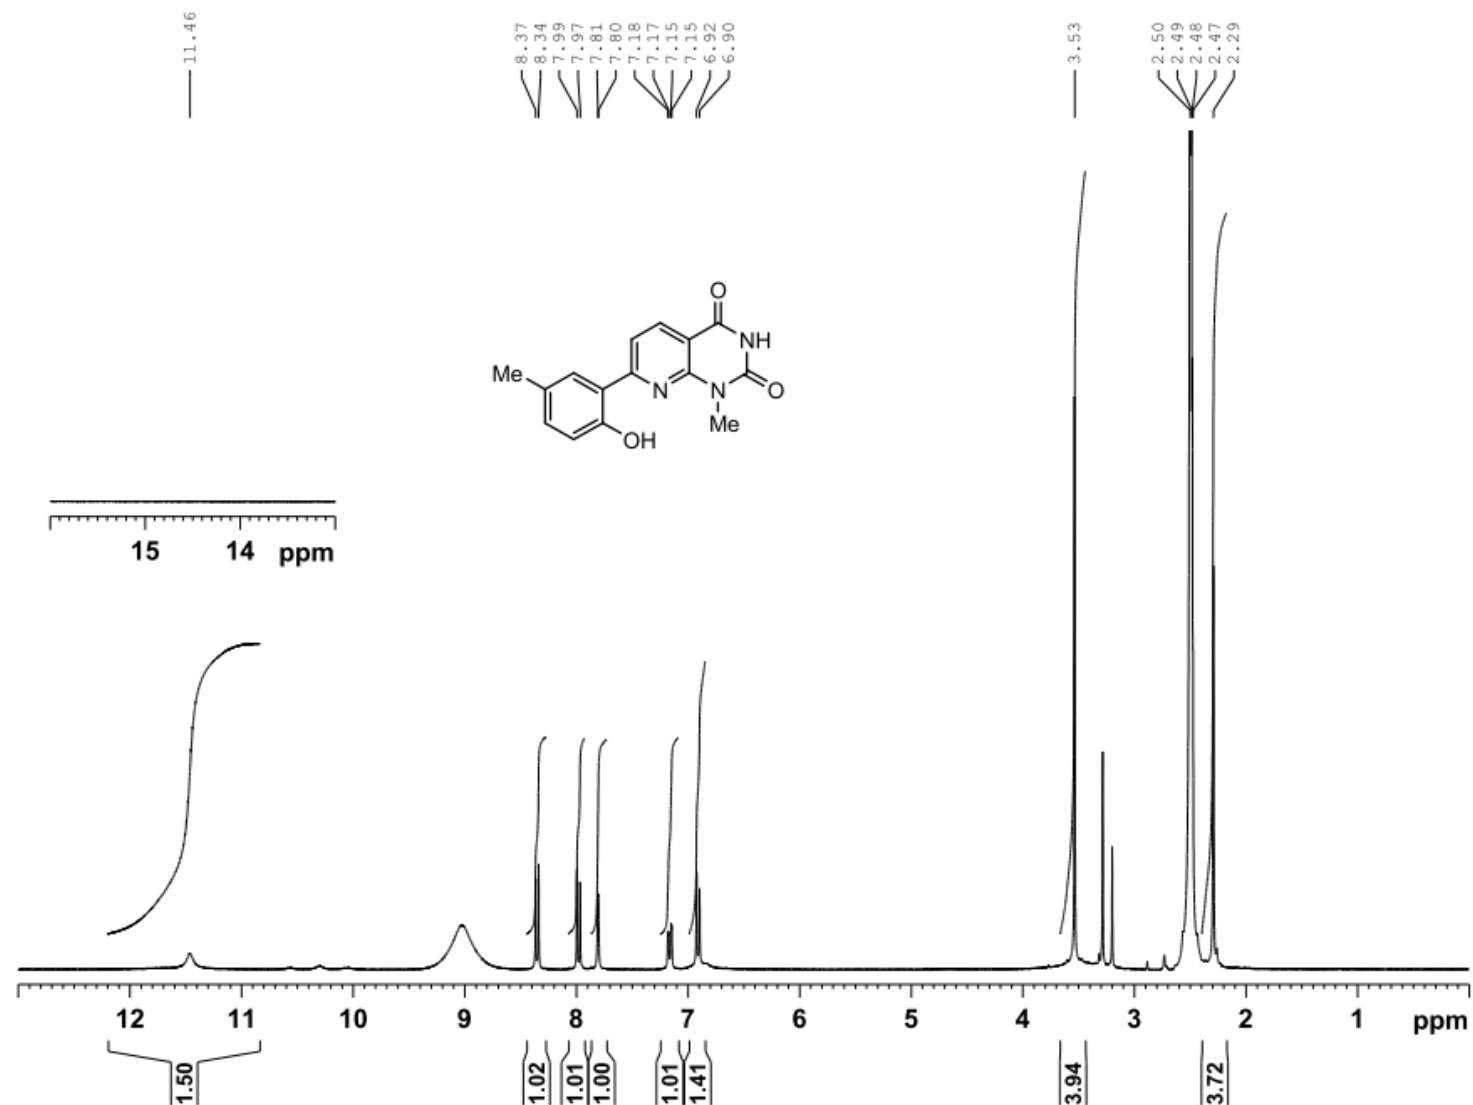

Current Data Parameters  
NAME 110201.u316 ag 161  
EXPNO 10  
PROCNO 1

F2 - Acquisition Parameters  
Date\_ 20110201  
Time 14.02  
INSTRUM spect  
PROBHD 5 mm PABBO BB-  
PULPROG zg30  
TD 65536  
SOLVENT DMSO  
NS 32  
DS 2  
SWH 6188.119 Hz  
FIDRES 0.094423 Hz  
AQ 5.2953587 sec  
RG 144  
DW 80.800 usec  
DE 10.00 usec  
TE 353.2 K  
D1 1.00000000 sec  
TD0 1

===== CHANNEL f1 =====  
NUC1 1H  
P1 10.00 usec  
PL1 0.00 dB  
PL1W 11.25325108 W  
SFO1 300.1318534 MHz

F2 - Processing parameters  
SI 32768  
SF 300.1300049 MHz  
WDW EM  
SSB 0  
LB 0.30 Hz  
GB 0  
PC 1.00



Gevorgyan AG133 1H DMSO

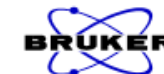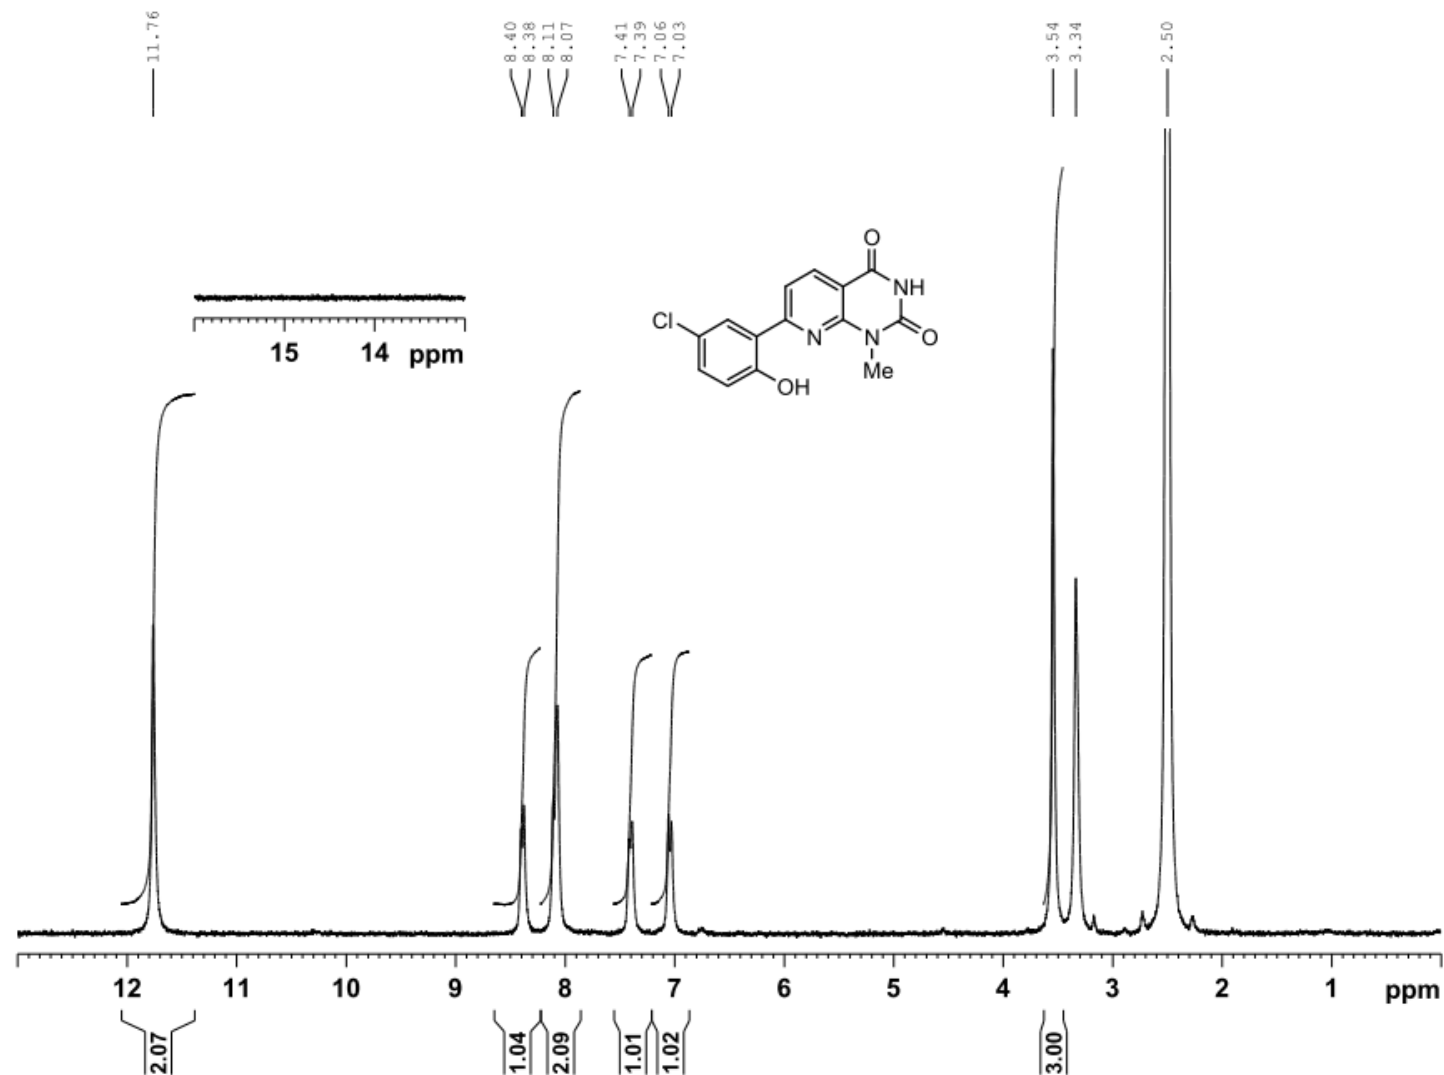

Current Data Parameters  
NAME 101222.u309 ag 133  
EXPNO 10  
PROCNO 1

F2 - Acquisition Parameters  
Date\_ 20101222  
Time 10.09  
INSTRUM spect  
PROBHD 5 mm PABBO BB-  
PULPROG zg30  
TD 65536  
SOLVENT DMSO  
NS 16  
DS 2  
SWH 6188.119 Hz  
FIDRES 0.094423 Hz  
AQ 5.2953587 sec  
RG 181  
DW 80.800 usec  
DE 10.00 usec  
TE 298.2 K  
D1 1.00000000 sec  
TD0 1

===== CHANNEL f1 =====  
NUC1 1H  
P1 10.00 usec  
PL1 0.00 dB  
PL1W 11.25325108 W  
SFO1 300.1318534 MHz

F2 - Processing parameters  
SI 32768  
SF 300.1300106 MHz  
WDW EM  
SSB 0  
LB 0.30 Hz  
GB 0  
PC 1.00

Gevorgyan AG139(1) 1H CDC13

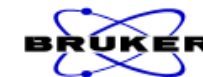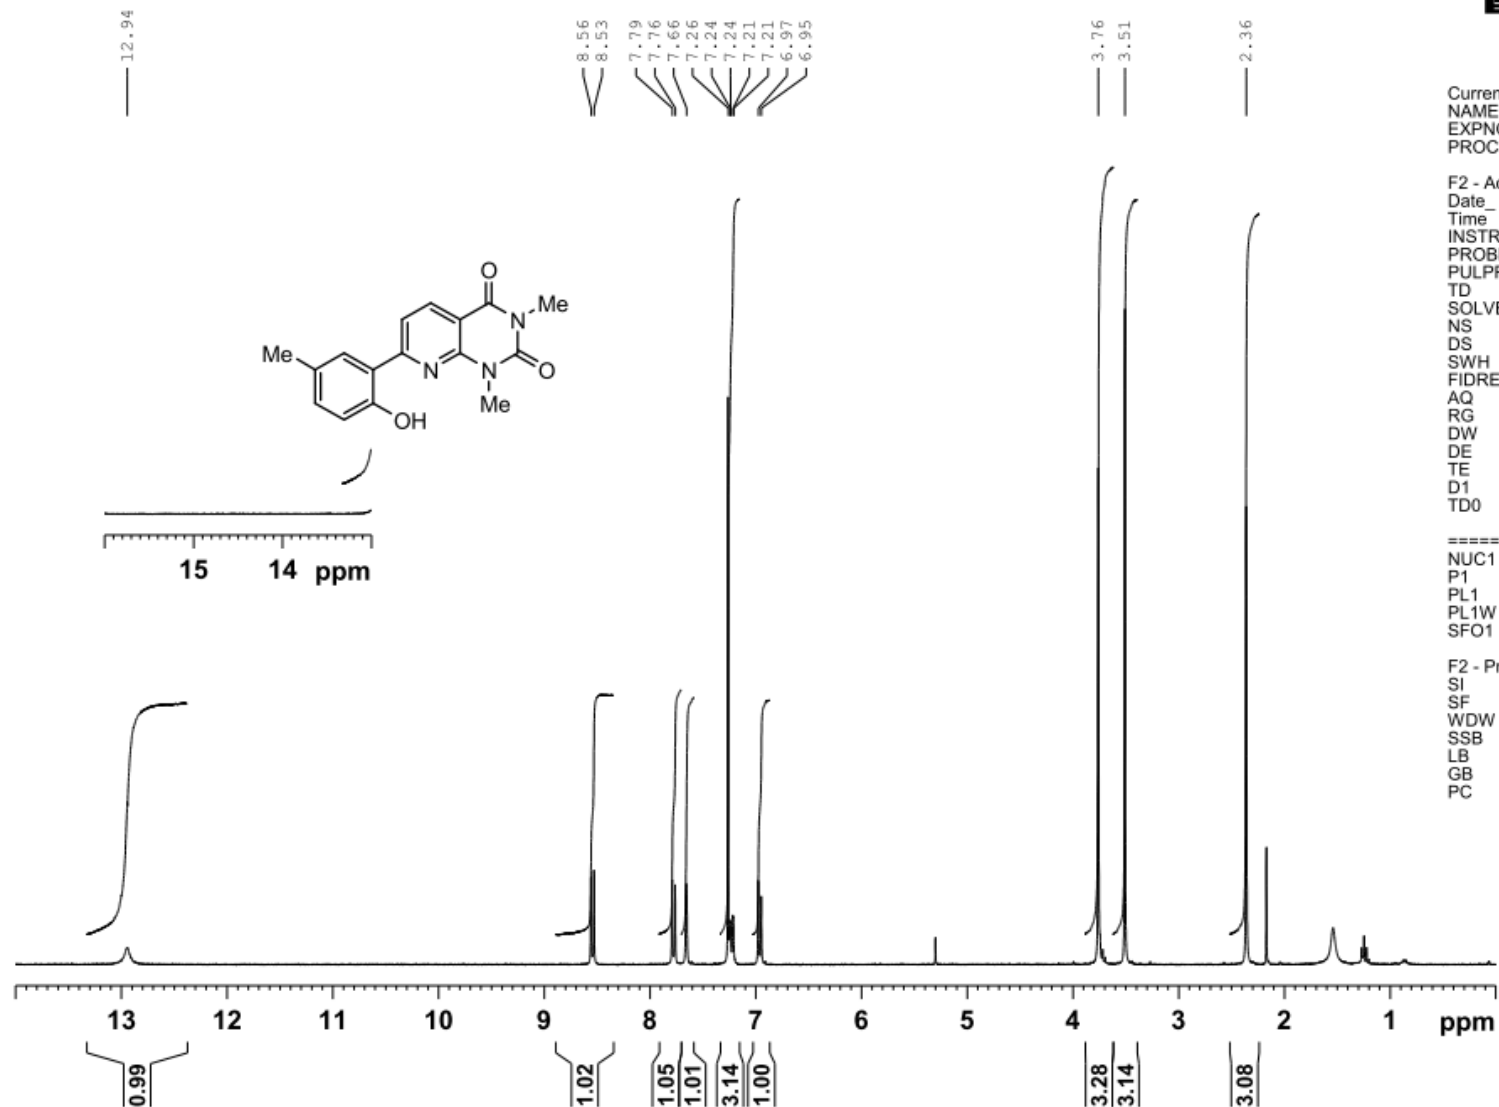

Current Data Parameters  
NAME 110110.u306 ag 139  
EXPNO 10  
PROCNO 1

F2 - Acquisition Parameters  
Date\_ 20110110  
Time 10.08  
INSTRUM spect  
PROBHD 5 mm PABBO BB-  
PULPROG zg30  
TD 65536  
SOLVENT CDCl3  
NS 16  
DS 2  
SWH 6188.119 Hz  
FIDRES 0.094423 Hz  
AQ 5.2953587 sec  
RG 406  
DW 80.800 usec  
DE 10.00 usec  
TE 298.2 K  
D1 1.0000000 sec  
TD0 1

==== CHANNEL f1 =====  
NUC1 1H  
P1 10.00 usec  
PL1 0.00 dB  
PL1W 11.25325108 W  
SFO1 300.1318534 MHz

F2 - Processing parameters  
SI 32768  
SF 300.1300085 MHz  
WDW EM  
SSB 0  
LB 0.30 Hz  
GB 0  
PC 1.00

Gevorgyan AG139 (1) 13C CDC13

162.12  
155.09  
151.34  
149.39  
138.69  
134.51  
128.76  
127.48  
118.59  
114.25  
108.24  
105.66

29.86  
28.64  
20.70

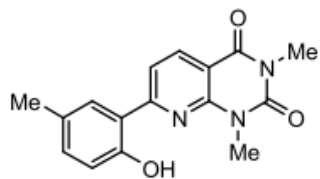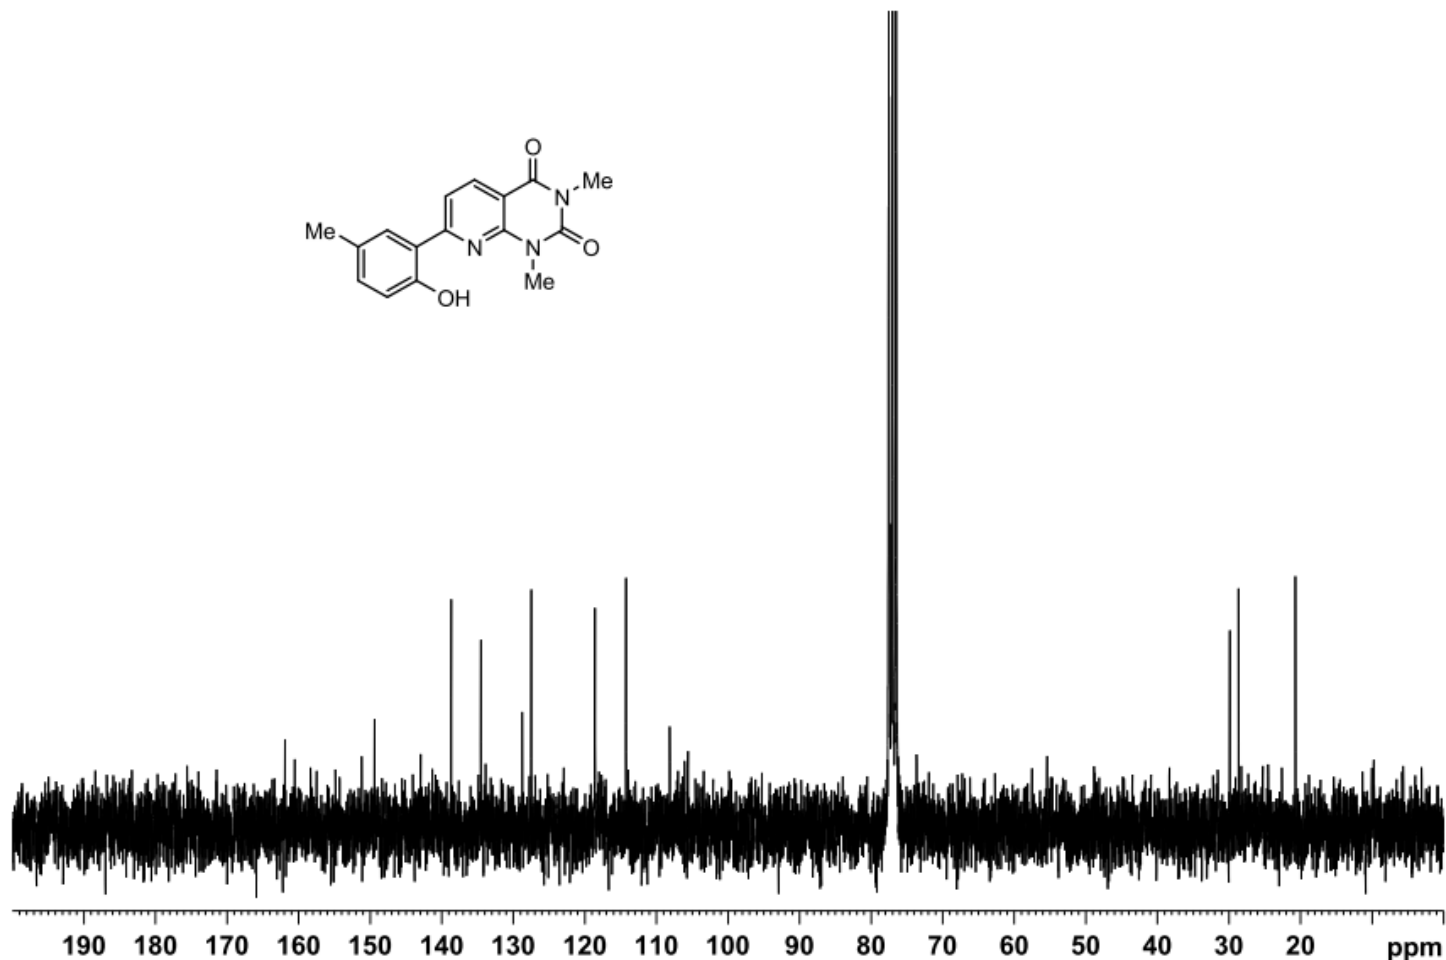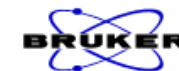

Current Data Parameters  
NAME 110111.206 ag 139 C  
EXPNO 10  
PROCNO 1

F2 - Acquisition Parameters  
Date\_ 20110111  
Time 20.44  
INSTRUM spect  
PROBHD 5 mm PABBO BB-  
PULPROG zgpg30  
TD 65536  
SOLVENT CDCl3  
NS 1400  
DS 4  
SWH 15000.000 Hz  
FIDRES 0.228882 Hz  
AQ 2.1845834 sec  
RG 2050  
DW 33.333 usec  
DE 10.00 usec  
TE 297.9 K  
D1 2.0000000 sec  
d11 0.0300000 sec  
DELTA 1.89999998 sec  
TD0 1

===== CHANNEL f1 =====  
NUC1 13C  
P1 10.00 usec  
PL1 -1.00 dB  
SFO1 62.9015280 MHz

===== CHANNEL f2 =====  
CPDPRG2 waltz16  
NUC2 1H  
PCPD2 70.00 usec  
PL12 15.00 dB  
PL13 15.00 dB  
PL2 -2.50 dB  
SFO2 250.1310005 MHz

F2 - Processing parameters  
SI 32768  
SF 62.8952383 MHz  
WDW EM  
SSB 0  
LB 1.00 Hz  
GB 0  
PC 1.40

Gevorgyan AG122 1H DMSO

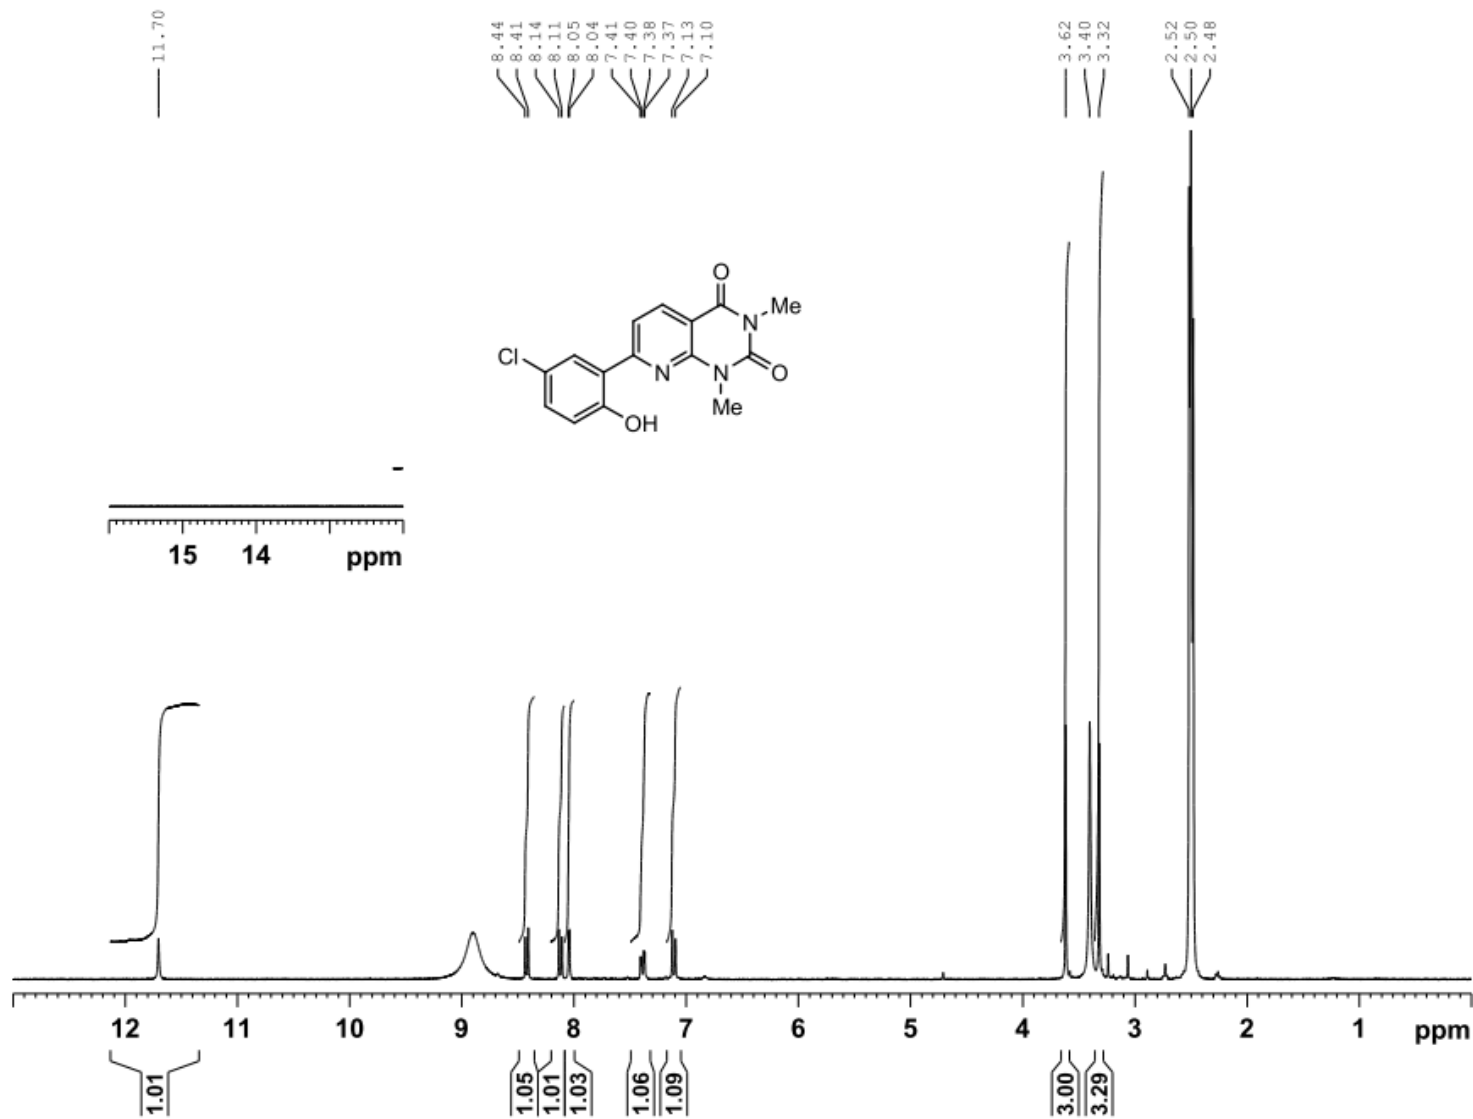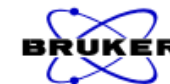

Current Data Parameters  
NAME 101216.u302 ag 122  
EXPNO 10  
PROCNO 1

F2 - Acquisition Parameters  
Date\_ 20101216  
Time 7.56  
INSTRUM spect  
PROBHD 5 mm PABBO BB-  
PULPROG zg30  
TD 65536  
SOLVENT DMSO  
NS 16  
DS 2  
SWH 6188.119 Hz  
FIDRES 0.094423 Hz  
AQ 5.2953587 sec  
RG 128  
DW 80.800 usec  
DE 10.00 usec  
TE 298.2 K  
D1 1.00000000 sec  
TD0 1

===== CHANNEL f1 =====  
NUC1 1H  
P1 10.00 usec  
PL1 0.00 dB  
PL1W 11.25325108 W  
SFO1 300.1318534 MHz

F2 - Processing parameters  
SI 32768  
SF 300.1300045 MHz  
WDW EM  
SSB 0  
LB 0.30 Hz  
GB 0  
PC 1.00

Gevorgyan AG122 13C DMSO

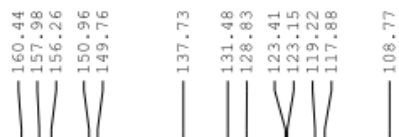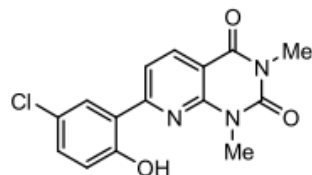

29.19  
28.09

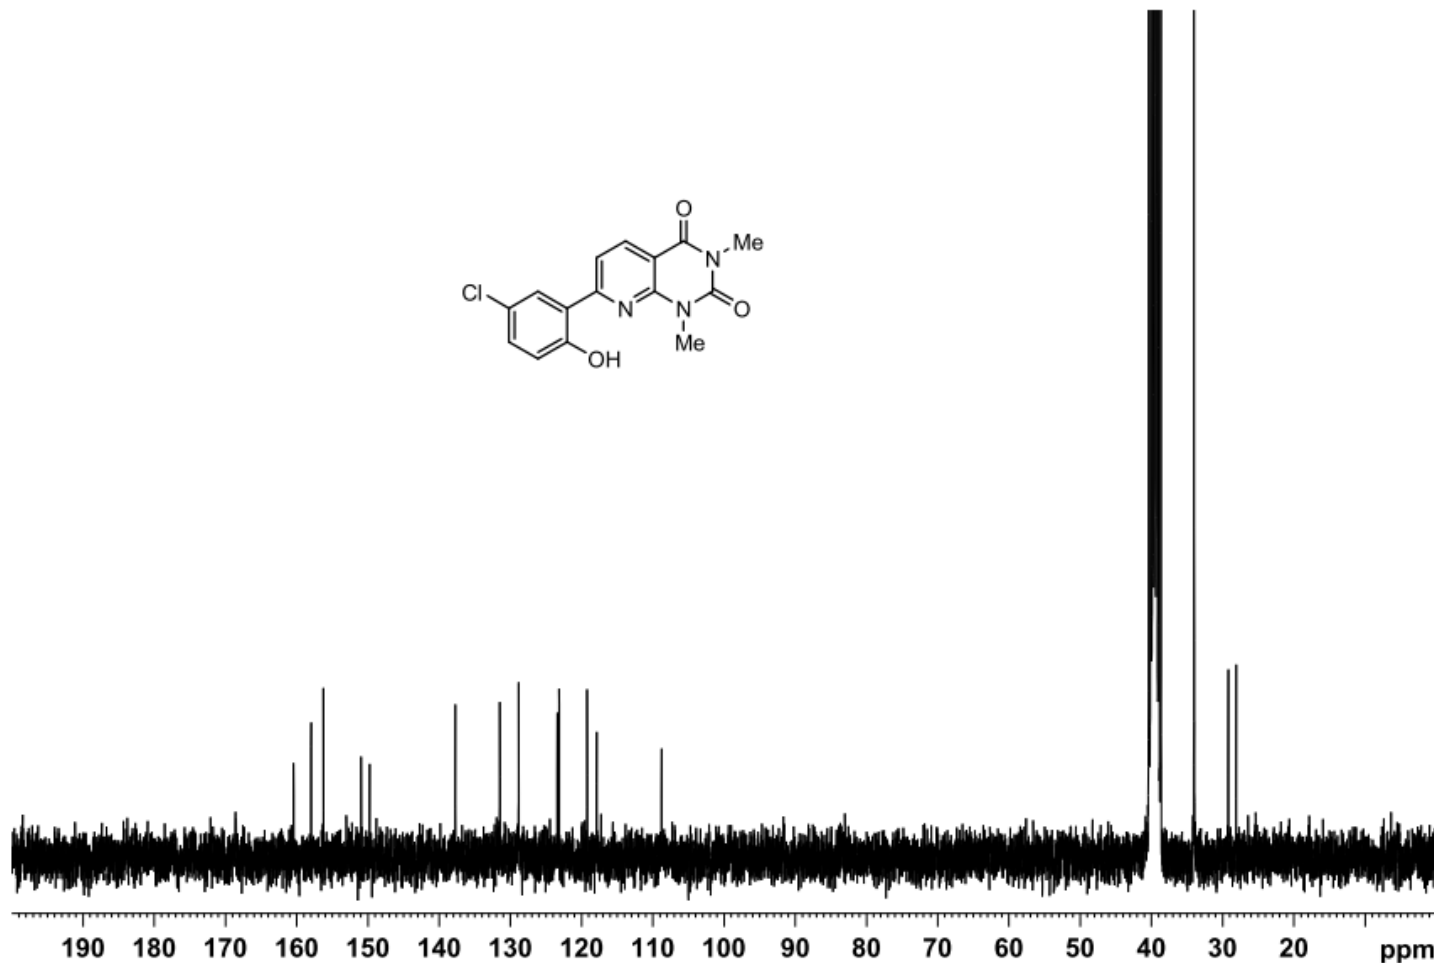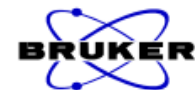

Current Data Parameters  
NAME 110104.u324 ag 122 C  
EXPNO 10  
PROCNO 1

F2 - Acquisition Parameters  
Date\_ 20110105  
Time 3.13  
INSTRUM spect  
PROBHD 5 mm PABBO BB-  
PULPROG zgpg30  
TD 65536  
SOLVENT DMSO  
NS 1400  
DS 4  
SWH 18028.846 Hz  
FIDRES 0.275098 Hz  
AQ 1.8175818 sec  
RG 2050  
DW 27.733 usec  
DE 10.00 usec  
TE 298.2 K  
D1 2.00000000 sec  
D11 0.03000000 sec  
TD0 1

===== CHANNEL f1 =====  
NUC1 13C  
P1 10.00 usec  
PL1 -0.50 dB  
PL1W 33.25691986 W  
SFO1 75.4752953 MHz

===== CHANNEL f2 =====  
CPDPRG2 waltz16  
NUC2 1H  
PCPD2 72.00 usec  
PL2 0.00 dB  
PL12 17.00 dB  
PL13 17.00 dB  
PL2W 11.25325108 W  
PL12W 0.22453187 W  
PL13W 0.22453187 W  
SFO2 300.1312005 MHz

F2 - Processing parameters  
SI 32768  
SF 75.4677870 MHz  
WDW EM  
SSB 0  
LB 1.00 Hz  
GB 0  
PC 1.40

Gevorgyan AG144 1H DMSO

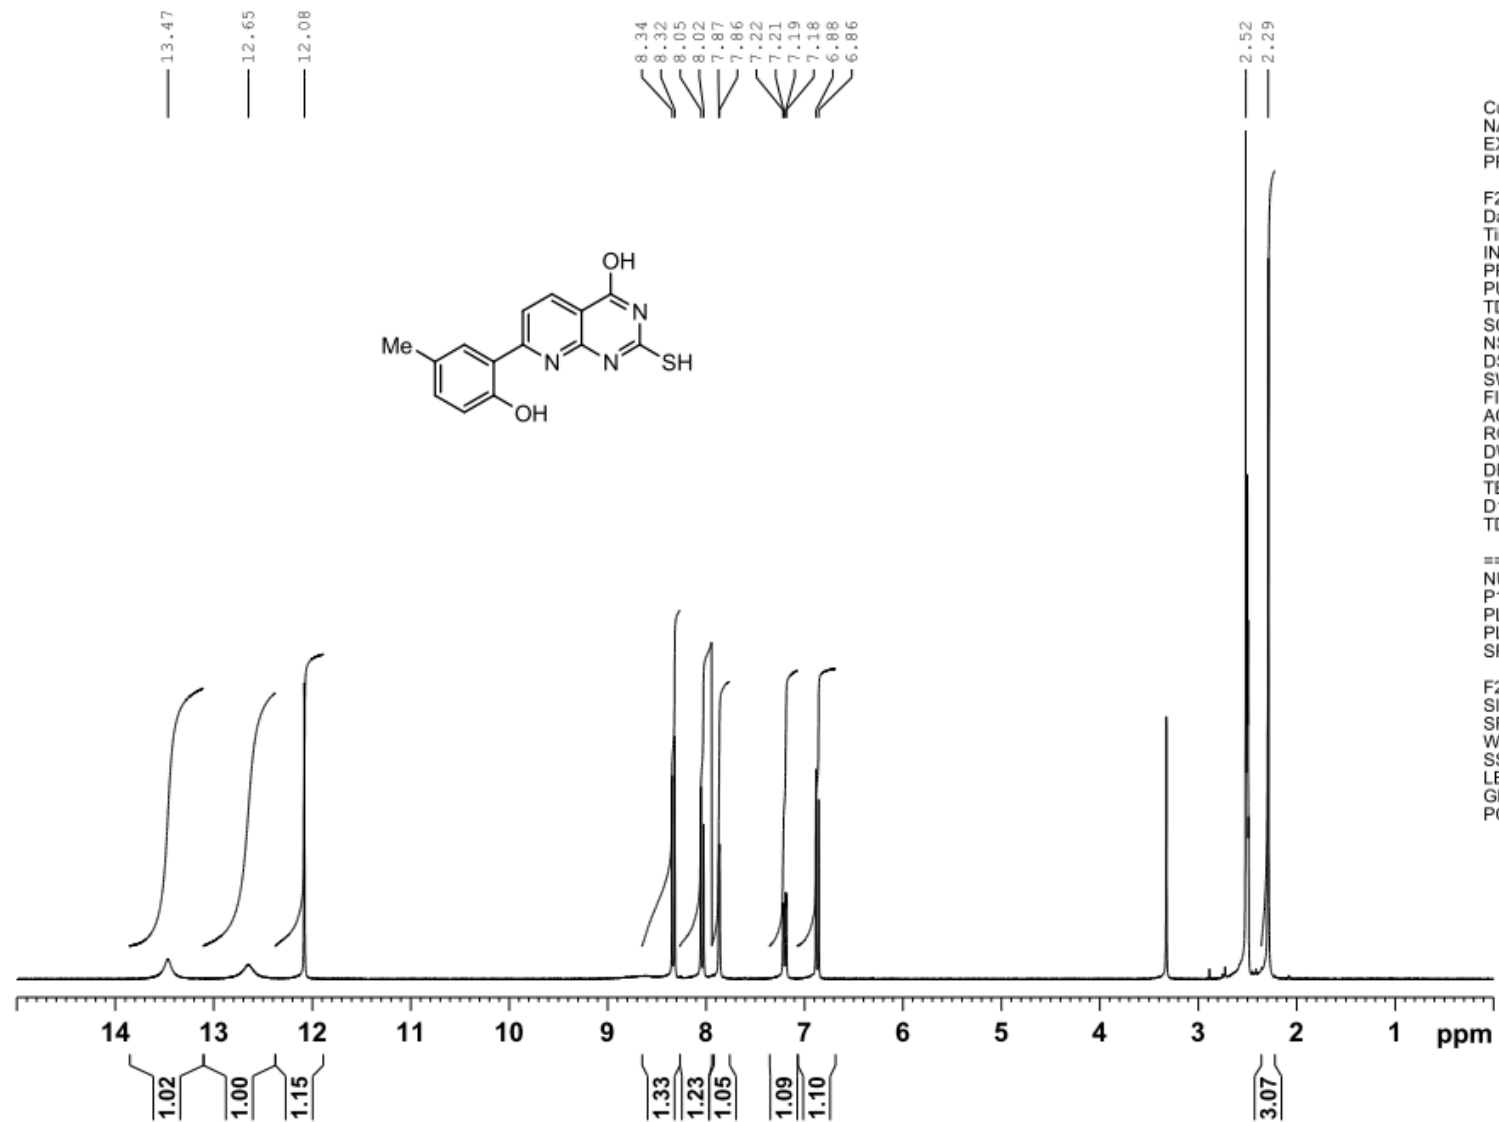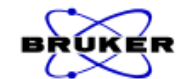

Current Data Parameters  
NAME 110111.u304 ag 144  
EXPNO 10  
PROCNO 1

F2 - Acquisition Parameters  
Date\_ 20110111  
Time 8.19  
INSTRUM spect  
PROBHD 5 mm PABBO BB-  
PULPROG zg30  
TD 65536  
SOLVENT DMSO  
NS 16  
DS 2  
SWH 6188.119 Hz  
FIDRES 0.094423 Hz  
AQ 5.2953587 sec  
RG 144  
DW 80.800 usec  
DE 10.00 usec  
TE 298.2 K  
D1 1.0000000 sec  
TD0 1

===== CHANNEL f1 =====  
NUC1 1H  
P1 10.00 usec  
PL1 0.00 dB  
PL1W 11.25325108 W  
SFO1 300.1318534 MHz

F2 - Processing parameters  
SI 32768  
SF 300.1300052 MHz  
WDW EM  
SSB 0  
LB 0.30 Hz  
GB 0  
PC 1.00

Gevorgyan AG144 13C DMSO

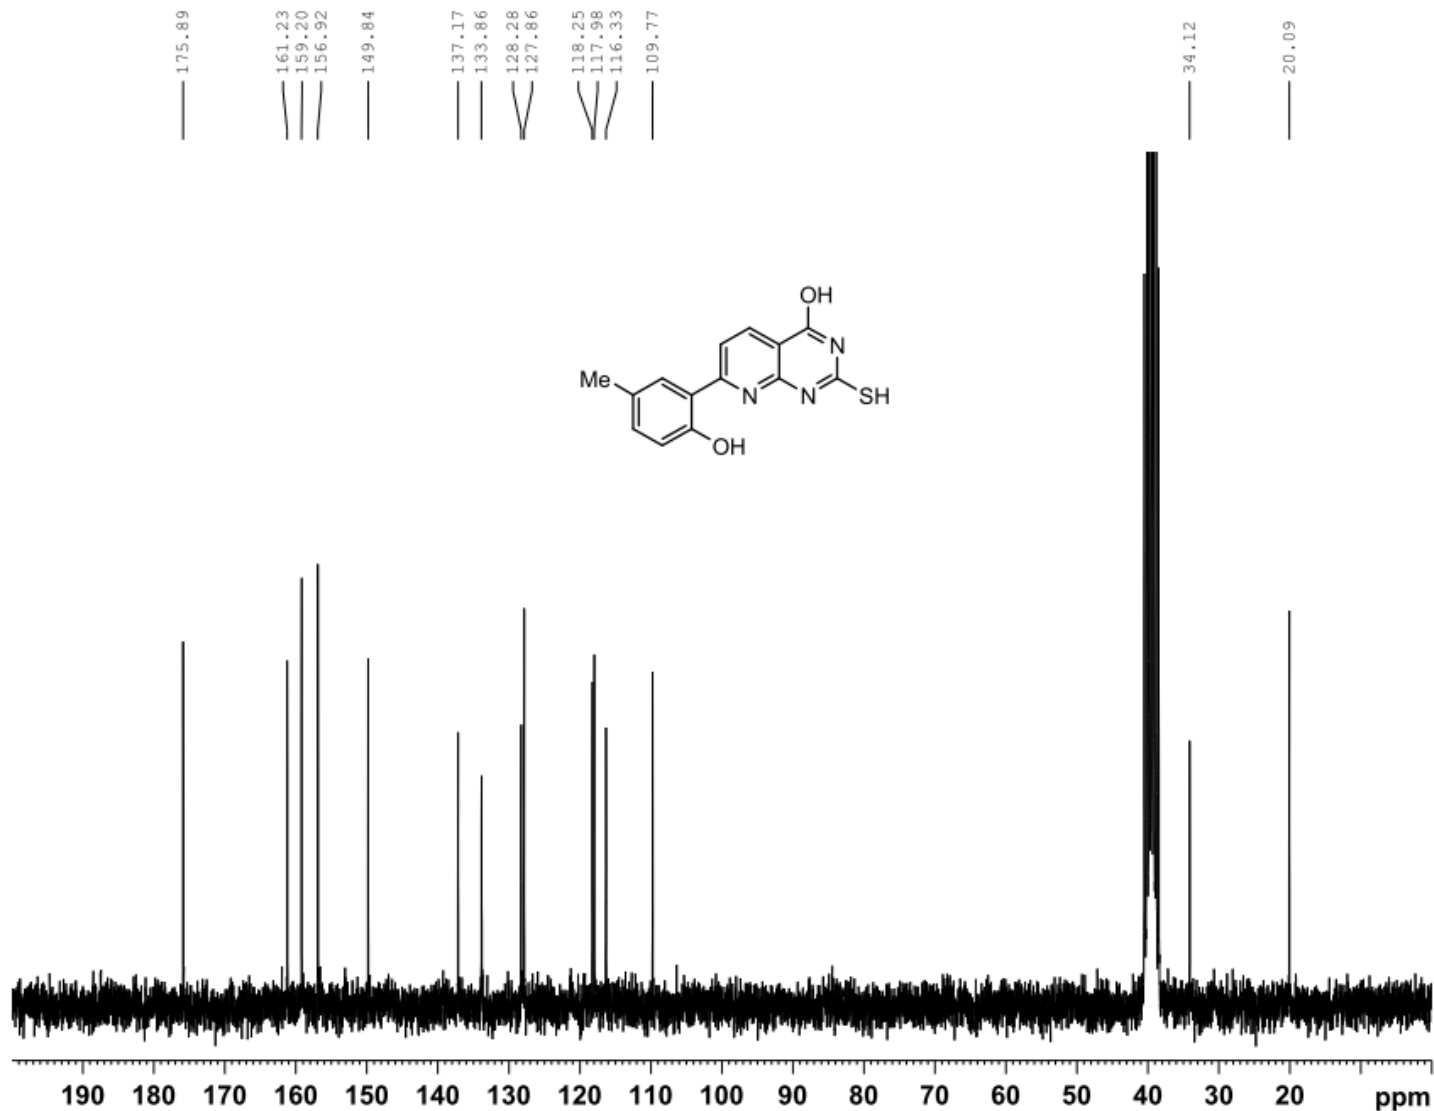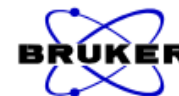

Current Data Parameters  
NAME 110113.208 ag 144 C  
EXPNO 10  
PROCNO 1

F2 - Acquisition Parameters  
Date\_ 20110113  
Time 11.09  
INSTRUM spect  
PROBHD 5 mm PABBO BB-  
PULPROG zgpg30  
TD 65536  
SOLVENT CDCl3  
NS 1157  
DS 4  
SWH 15000.000 Hz  
FIDRES 0.228882 Hz  
AQ 2.1845834 sec  
RG 2050  
DW 33.333 usec  
DE 10.00 usec  
TE 298.2 K  
D1 2.00000000 sec  
d11 0.03000000 sec  
DELTA 1.89999998 sec  
TD0 1

===== CHANNEL f1 =====  
NUC1 13C  
P1 10.00 usec  
PL1 -1.00 dB  
SFO1 62.9015280 MHz

===== CHANNEL f2 =====  
CPDPRG2 waltz16  
NUC2 1H  
PCPD2 70.00 usec  
PL12 15.00 dB  
PL13 15.00 dB  
PL2 -2.50 dB  
SFO2 250.1310005 MHz

F2 - Processing parameters  
SI 32768  
SF 62.8955672 MHz  
WDW EM  
SSB 0  
LB 1.00 Hz  
GB 0  
PC 1.40

Gevorgyan AG178 (1) 1H DMSO

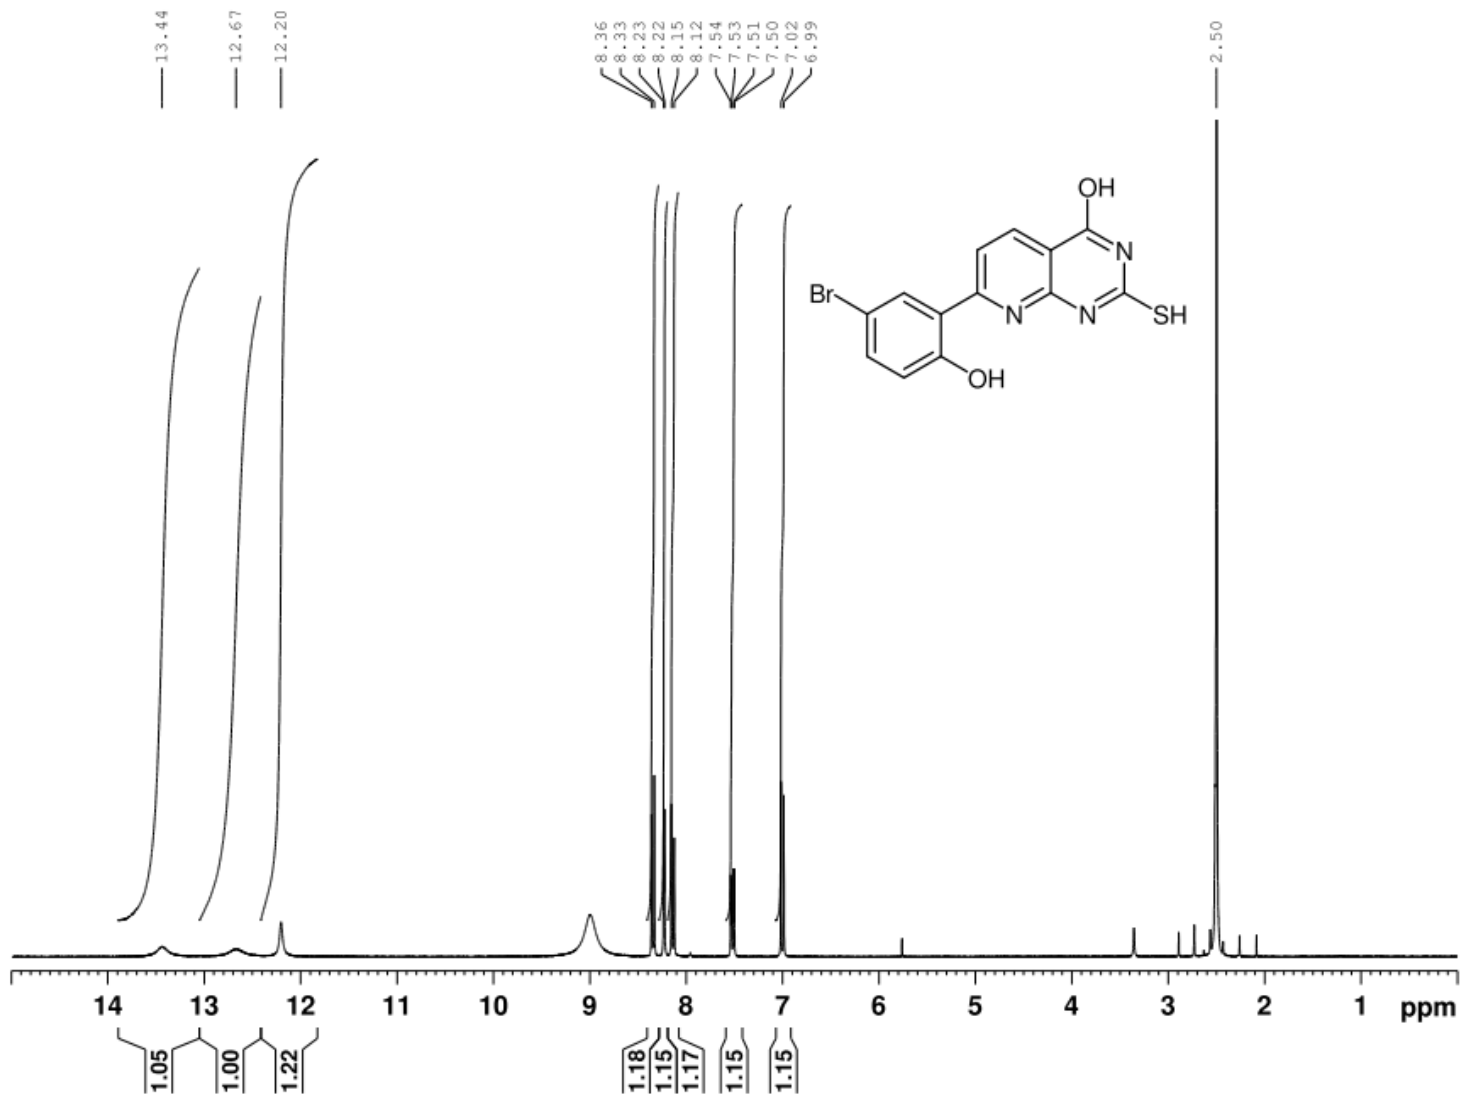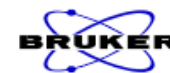

NAME 110218.u311 ag 178  
EXPNO 10  
PROCNO 1  
Date\_ 20110218  
Time 8.45  
INSTRUM spect  
PROBHD 5 mm PABBO BB-  
PULPROG zg30  
TD 65536  
SOLVENT DMSO  
NS 16  
DS 2  
SWH 6188.119 Hz  
FIDRES 0.094423 Hz  
AQ 5.2953587 sec  
RG 128  
DW 80.800 usec  
DE 10.00 usec  
TE 298.2 K  
D1 1.00000000 sec  
TD0 1

===== CHANNEL f1 =====  
NUC1 1H  
P1 10.00 usec  
PL1 0.00 dB  
PL1W 11.25325108 W  
SFO1 300.1318534 MHz  
SI 32768  
SF 300.1300017 MHz  
WDW EM  
SSB 0  
LB 0.30 Hz  
GB 0  
PC 1.00



Gevorgyan AG178(1) 13C DMSO

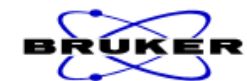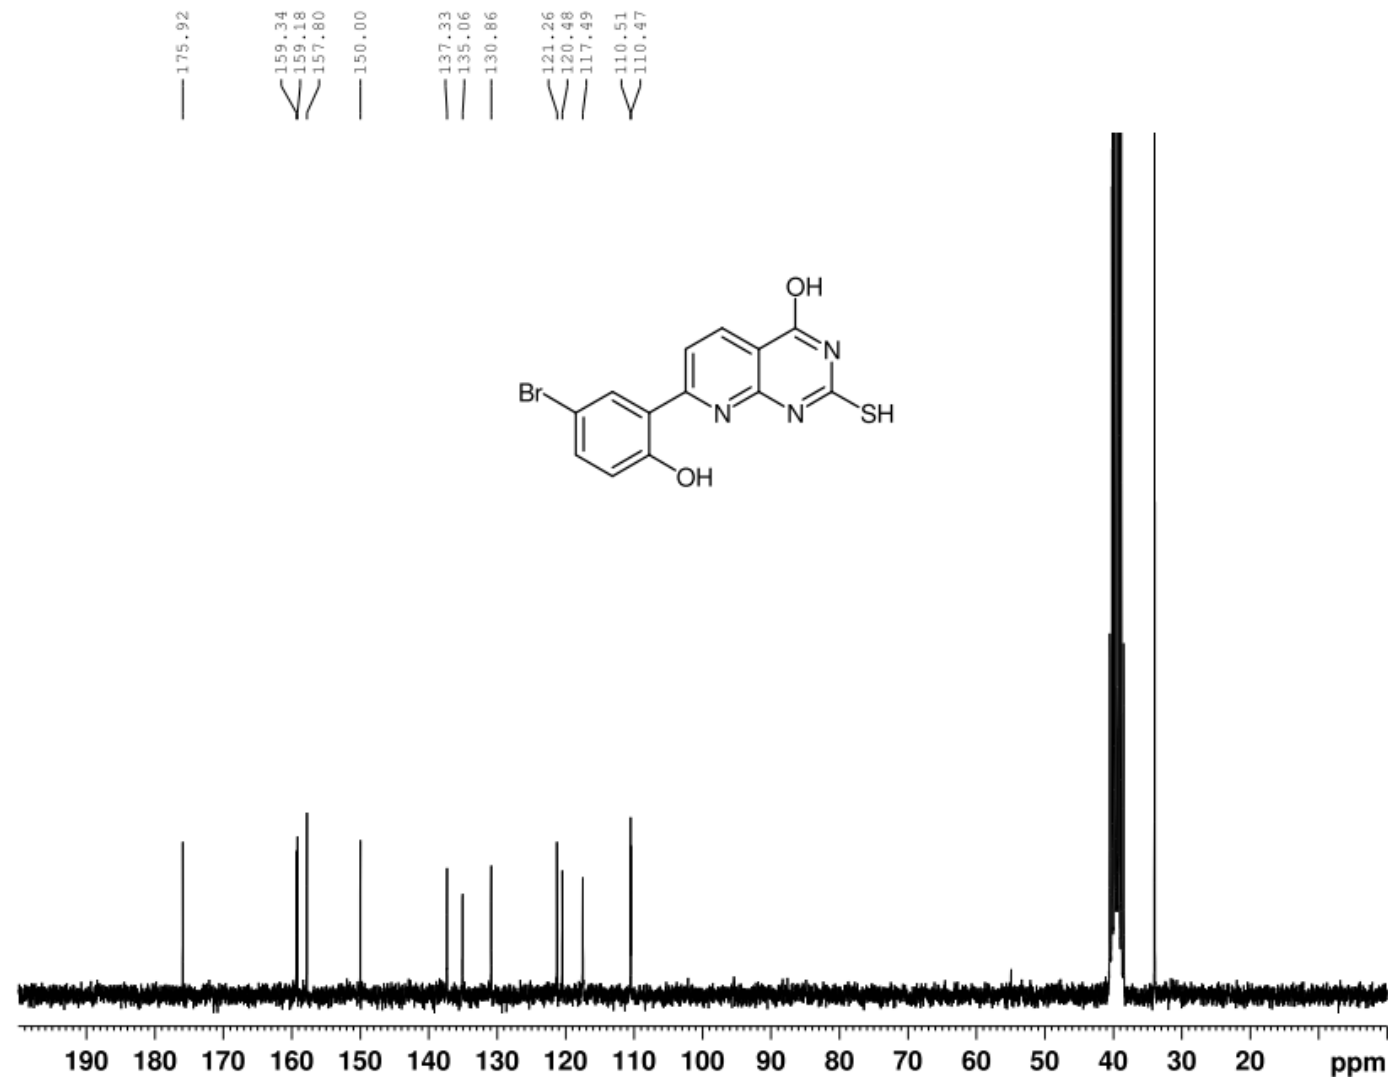

NAME 110221.206 ag 178C  
EXPNO 10  
PROCNO 1  
Date\_ 20110221  
Time 17.28  
INSTRUM spect  
PROBHD 5 mm PABBO BB-  
PULPROG zgpg30  
TD 65536  
SOLVENT DMSO  
NS 1024  
DS 4  
SWH 15000.000 Hz  
FIDRES 0.228882 Hz  
AQ 2.1845834 sec  
RG 2050  
DW 33.333 usec  
DE 10.00 usec  
TE 298.5 K  
D1 2.00000000 sec  
d11 0.03000000 sec  
DELTA 1.89999998 sec  
TD0 1

===== CHANNEL f1 =====  
NUC1 13C  
P1 10.00 usec  
PL1 -1.00 dB  
SFO1 62.9015280 MHz

===== CHANNEL f2 =====  
CPDPRG2 waltz16  
NUC2 1H  
PCPD2 70.00 usec  
PL12 15.00 dB  
PL13 15.00 dB  
PL2 -2.50 dB  
SFO2 250.1310005 MHz  
SI 32768  
SF 62.8952692 MHz  
WDW EM  
SSB 0  
LB 1.00 Hz  
GB 0  
PC 1.40

Gevorgyan AG127 1H DMSO

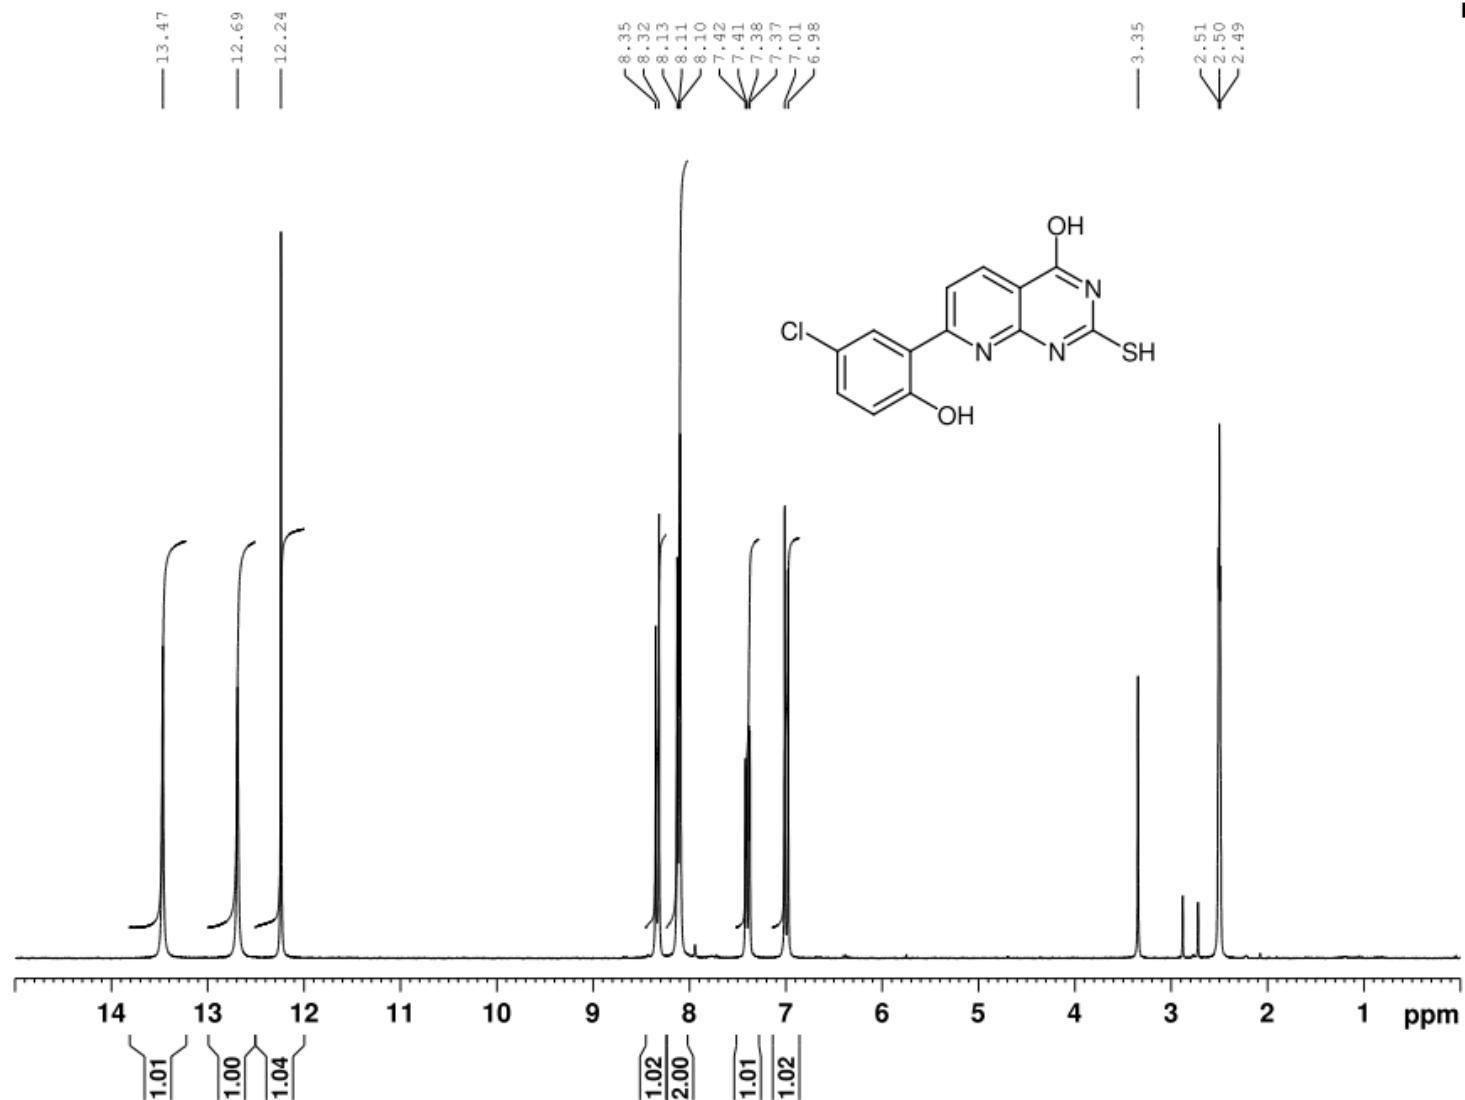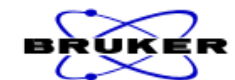

NAME 101220.212 ag 127  
EXPNO 10  
PROCNO 1  
Date\_ 20101220  
Time 23.51  
INSTRUM spect  
PROBHD 5 mm PABBO BB-  
PULPROG zg30  
TD 65536  
SOLVENT DMSO  
NS 16  
DS 2  
SWH 5165.289 Hz  
FIDRES 0.078816 Hz  
AQ 6.3439350 sec  
RG 575  
DW 96.800 usec  
DE 10.00 usec  
TE 294.8 K  
D1 1.00000000 sec  
TD0 1

===== CHANNEL f1 =====  
NUC1 1H  
P1 10.00 usec  
PL1 -2.50 dB  
SFO1 250.1315447 MHz  
SI 32768  
SF 250.1299985 MHz  
WDW EM  
SSB 0  
LB 0.30 Hz  
GB 0  
PC 1.00

Gevorgyan AG127 13C DMSO

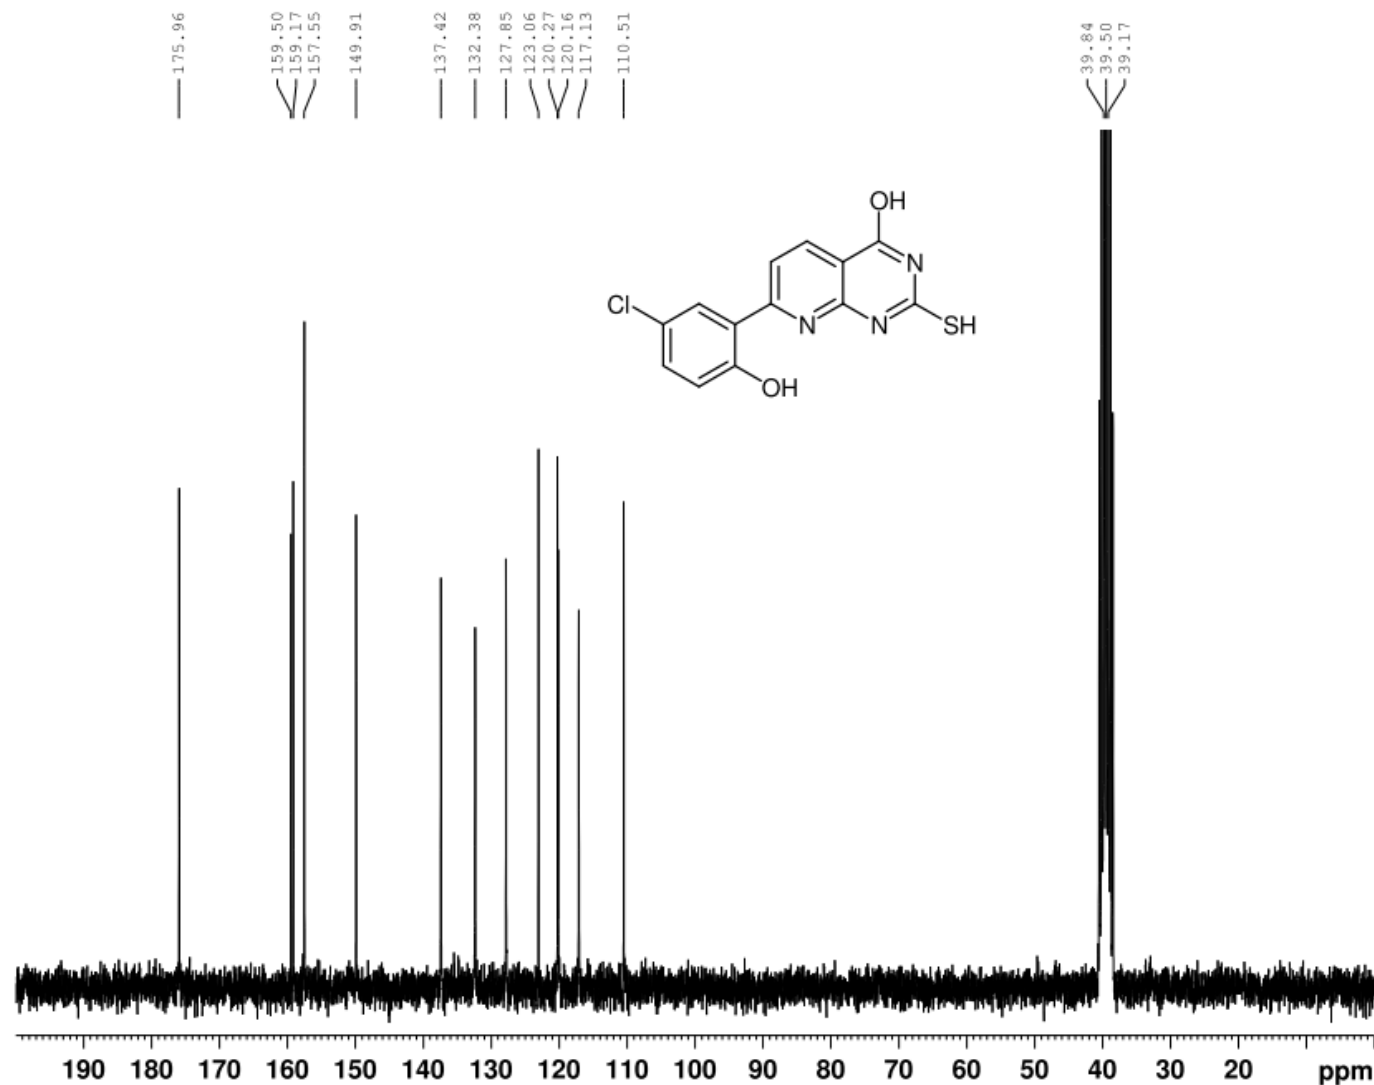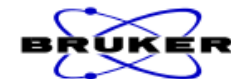

NAME 101220.212 ag 127  
EXPNO 11  
PROCNO 1  
Date\_ 20101221  
Time 1.05  
INSTRUM spect  
PROBHD 5 mm PABBO BB-  
PULPROG zgpg30  
TD 65536  
SOLVENT DMSO  
NS 1024  
DS 4  
SWH 15000.000 Hz  
FIDRES 0.228882 Hz  
AQ 2.1845834 sec  
RG 2050  
DW 33.333 usec  
DE 10.00 usec  
TE 295.9 K  
D1 2.0000000 sec  
d11 0.03000000 sec  
DELTA 1.89999998 sec  
TD0 1

===== CHANNEL f1 =====  
NUC1 13C  
P1 10.00 usec  
PL1 -1.00 dB  
SFO1 62.9015280 MHz

===== CHANNEL f2 =====  
CPDPRG2 waltz16  
NUC2 1H  
PCPD2 70.00 usec  
PL12 15.00 dB  
PL13 15.00 dB  
PL2 -2.50 dB  
SFO2 250.1310005 MHz  
SI 32768  
SF 62.8952674 MHz  
WDW EM  
SSB 0  
LB 1.00 Hz  
GB 0  
PC 1.40

Gevorgyan AG165 (4) 1H DMSO

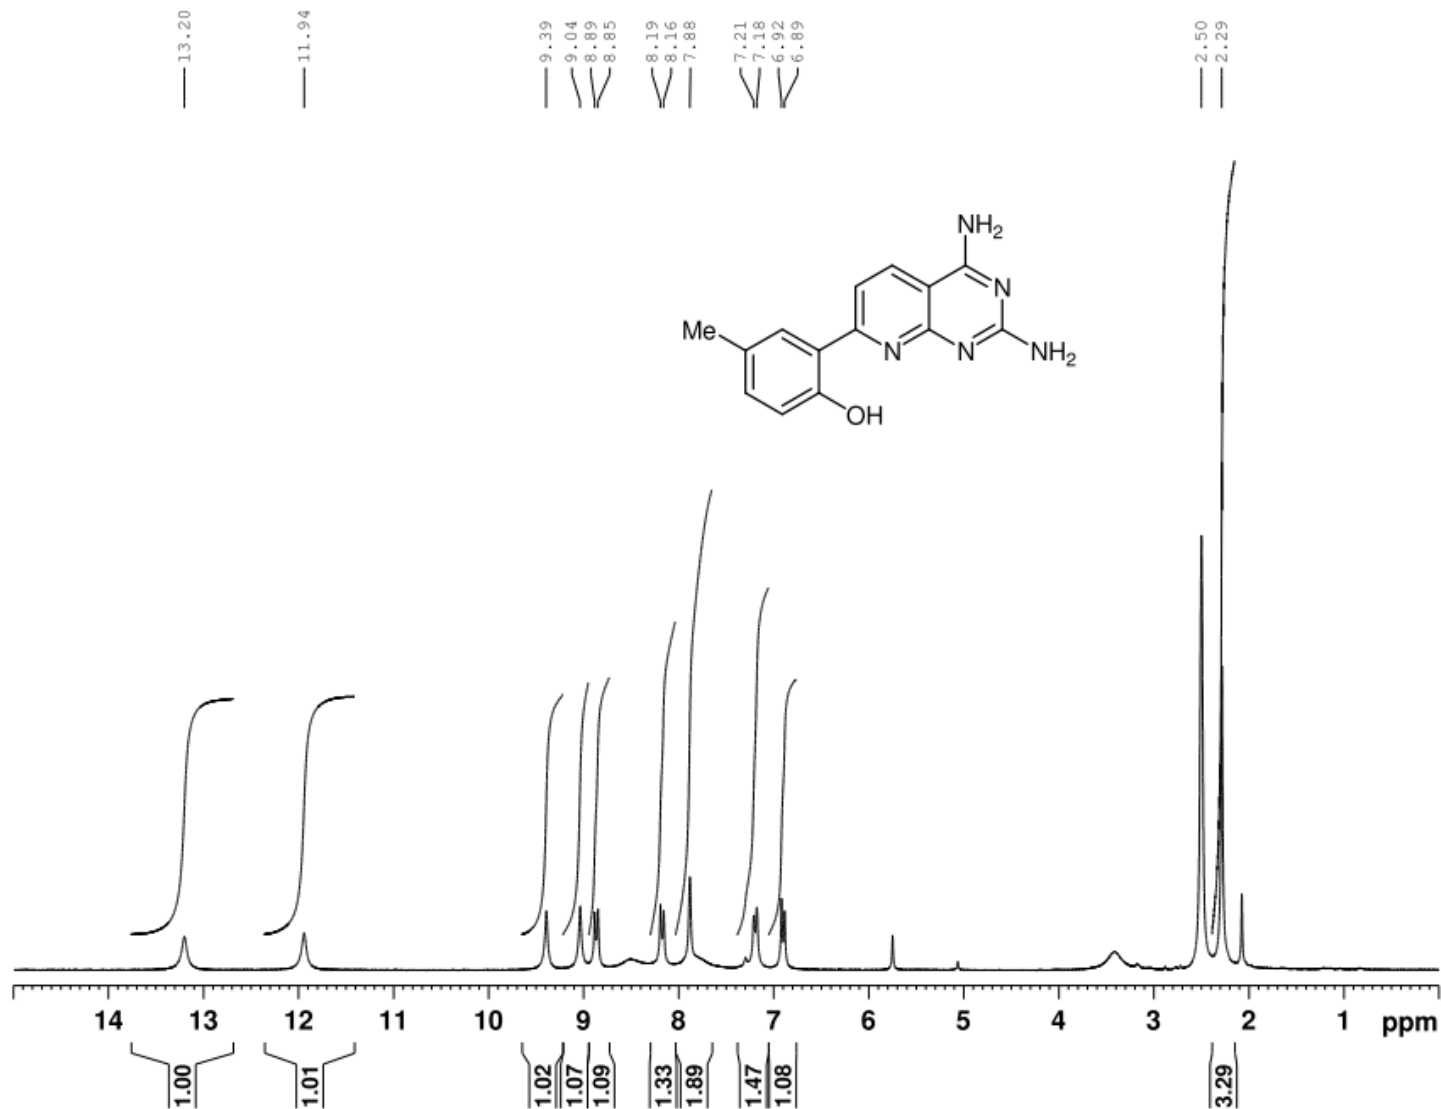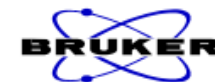

NAME 110216.221 ag 165  
EXPNO 10  
PROCNO 1  
Date\_ 20110216  
Time 14.23  
INSTRUM spect  
PROBHD 5 mm PABBO BB-  
PULPROG zg30  
TD 65536  
SOLVENT DMSO  
NS 16  
DS 2  
SWH 5165.289 Hz  
FIDRES 0.078816 Hz  
AQ 6.3439350 sec  
RG 406  
DW 96.800 usec  
DE 10.00 usec  
TE 298.0 K  
D1 1.00000000 sec  
TD0 1

===== CHANNEL f1 =====  
NUC1 1H  
P1 10.00 usec  
PL1 -2.50 dB  
SFO1 250.1315447 MHz  
SI 32768  
SF 250.1299978 MHz  
WDW EM  
SSB 0  
LB 0.30 Hz  
GB 0  
PC 1.00

Gevorgyan AG165 (4) 13C DMSO

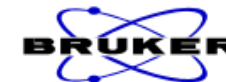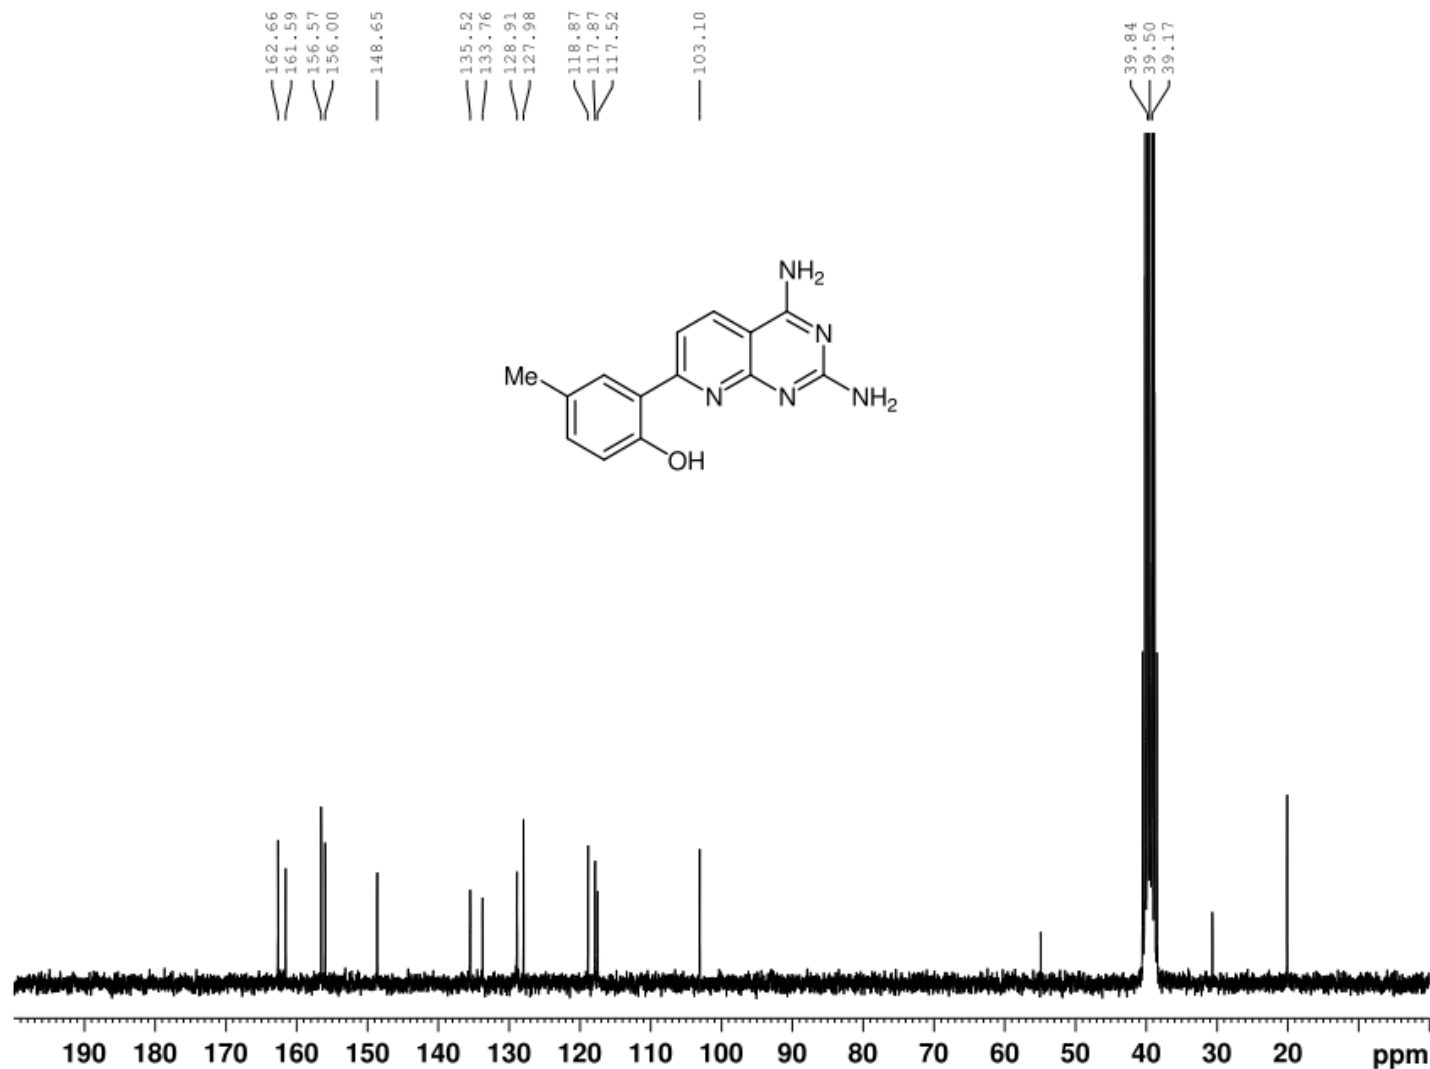

NAME 110217.210 ag 165 C  
EXPNO 10  
PROCNO 1  
Date\_ 20110218  
Time 6.39  
INSTRUM spect  
PROBHD 5 mm PABBO BB-  
PULPROG zgpg30  
TD 65536  
SOLVENT DMSO  
NS 1024  
DS 4  
SWH 15000.000 Hz  
FIDRES 0.228882 Hz  
AQ 2.1845834 sec  
RG 2050  
DW 33.333 usec  
DE 10.00 usec  
TE 297.9 K  
D1 2.00000000 sec  
d11 0.03000000 sec  
DELTA 1.89999998 sec  
TD0 1

===== CHANNEL f1 =====  
NUC1 13C  
P1 10.00 usec  
PL1 -1.00 dB  
SFO1 62.9015280 MHz

===== CHANNEL f2 =====  
CPDPRG2 waltz16  
NUC2 1H  
PCPD2 70.00 usec  
PL12 15.00 dB  
PL13 15.00 dB  
PL2 -2.50 dB  
SFO2 250.1310005 MHz  
SI 32768  
SF 62.8952687 MHz  
WDW EM  
SSB 0  
LB 1.00 Hz  
GB 0  
PC 1.40

Gevorgyan AG147(3) 1H DMSO

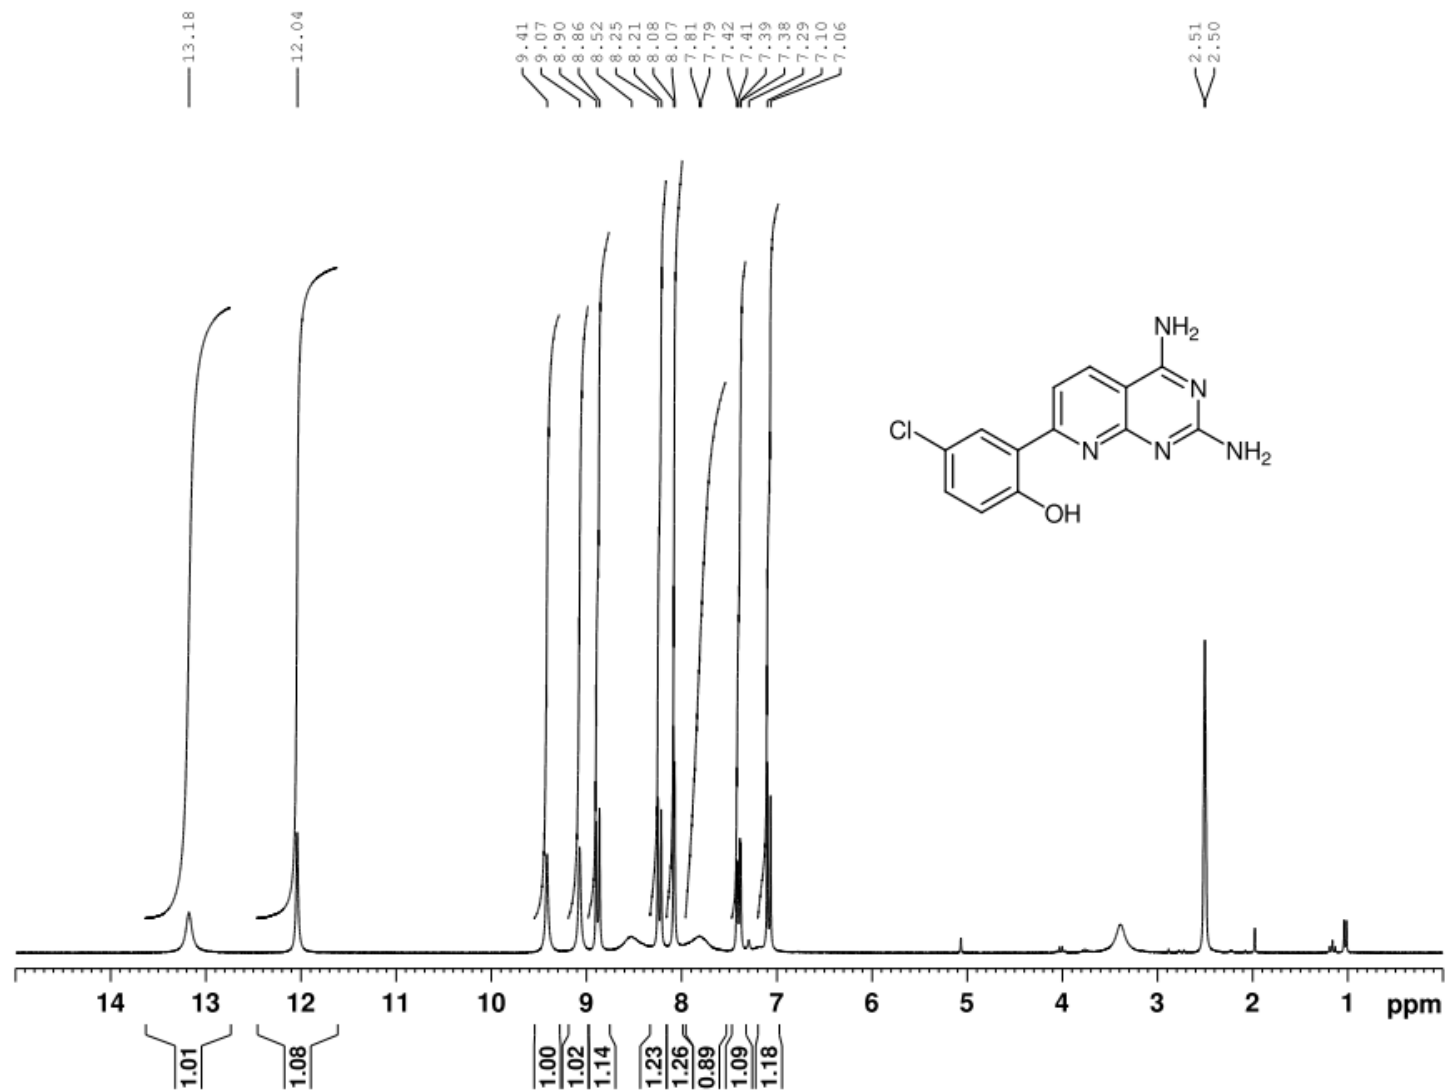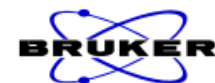

NAME 110119.207 ag 147  
EXPNO 10  
PROCNO 1  
Date\_ 20110119  
Time 9.36  
INSTRUM spect  
PROBHD 5 mm PABBO BB-  
PULPROG zg30  
TD 65536  
SOLVENT DMSO  
NS 16  
DS 2  
SWH 5165.289 Hz  
FIDRES 0.078816 Hz  
AQ 6.3439350 sec  
RG 512  
DW 96.800 usec  
DE 10.00 usec  
TE 297.9 K  
D1 1.00000000 sec  
TD0 1

----- CHANNEL f1 -----  
NUC1 1H  
P1 10.00 usec  
PL1 -2.50 dB  
SFO1 250.1315447 MHz  
SI 32768  
SF 250.1299984 MHz  
WDW EM  
SSB 0  
LB 0.30 Hz  
GB 0  
PC 1.00

Gevorgyan AG147(3) 13C DMSO

162.69  
159.75  
157.05  
156.12  
148.89  
135.65  
132.14  
128.46  
123.10  
121.63  
119.70  
116.50  
103.78

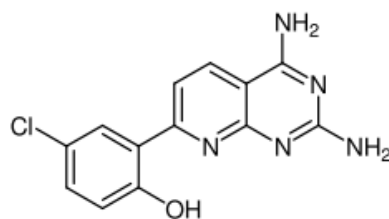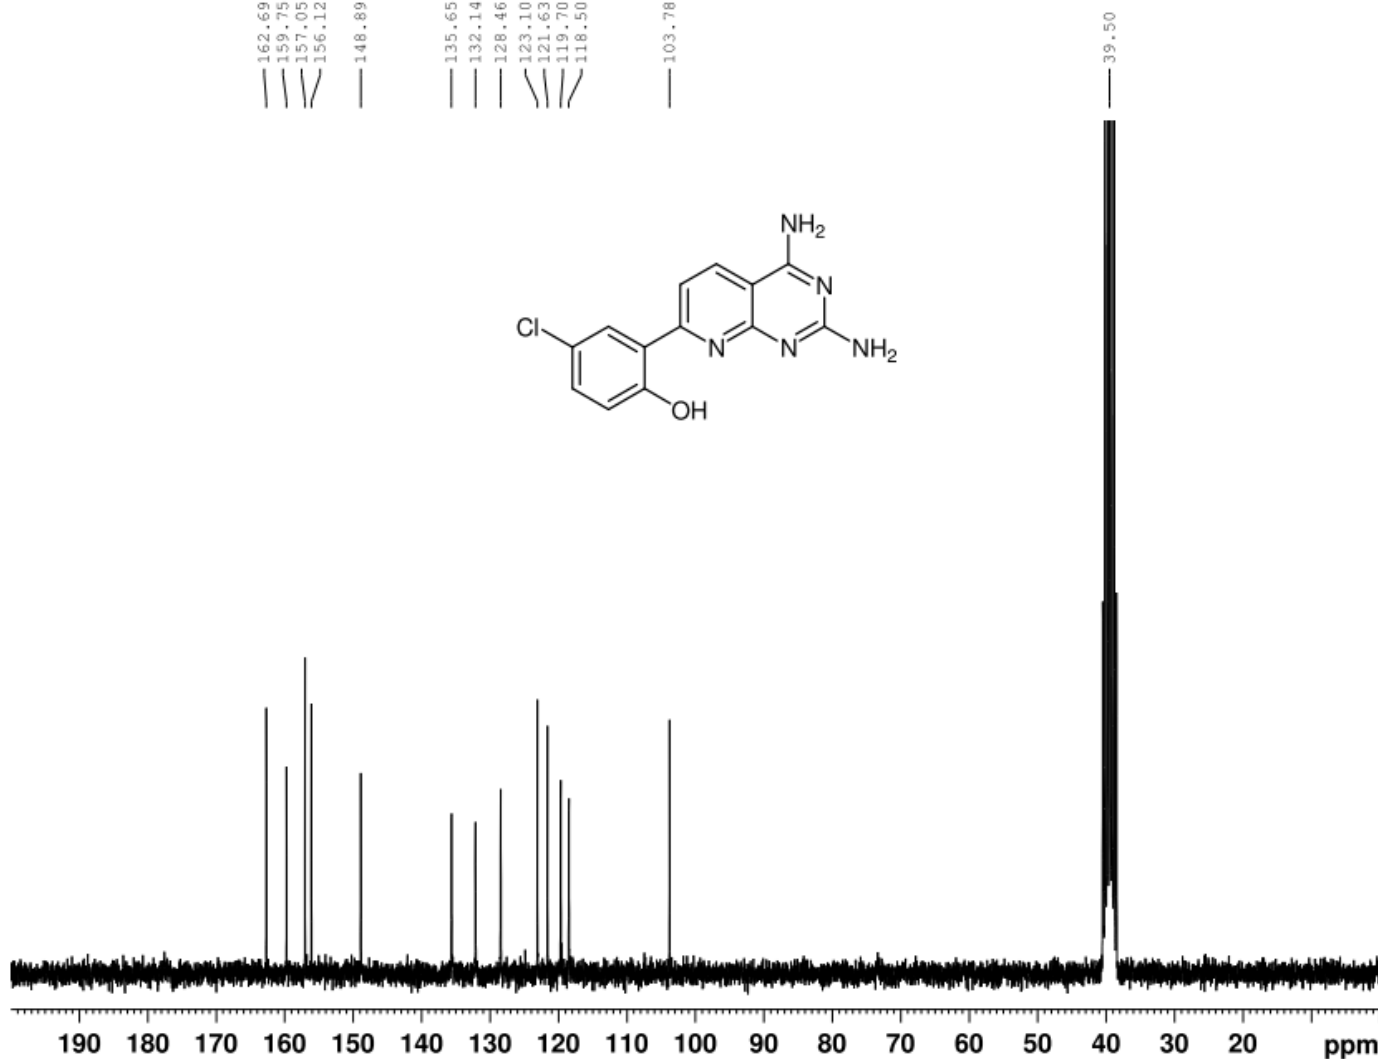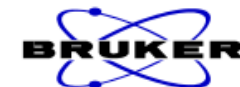

NAME 110121.223 ag 147 C  
EXPNO 10  
PROCNO 1  
Date\_ 20110123  
Time 2.21  
INSTRUM spect  
PROBHD 5 mm PABBO BB-  
PULPROG zgpg30  
TD 65536  
SOLVENT DMSO  
NS 1024  
DS 4  
SWH 15000.000 Hz  
FIDRES 0.228882 Hz  
AQ 2.1845834 sec  
RG 2050  
DW 33.333 usec  
DE 10.00 usec  
TE 297.9 K  
D1 2.00000000 sec  
d11 0.03000000 sec  
DELTA 1.89999998 sec  
TD0 1

===== CHANNEL f1 =====  
NUC1 13C  
P1 10.00 usec  
PL1 -1.00 dB  
SFO1 62.9015280 MHz

===== CHANNEL f2 =====  
CPDPRG2 waltz16  
NUC2 1H  
PCPD2 70.00 usec  
PL12 15.00 dB  
PL13 15.00 dB  
PL2 -2.50 dB  
SFO2 250.1310005 MHz  
SI 32768  
SF 62.8952687 MHz  
WDW EM  
SSB 0  
LB 1.00 Hz  
GB 0  
PC 1.40

Gevorgyan AG201 1H DMSO

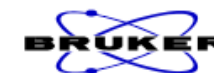

NAME 110311.u301 ag 201  
EXPNO 10  
PROCNO 1  
Date\_ 20110311  
Time 8.36  
INSTRUM spect  
PROBHD 5 mm PABBO BB-  
PULPROG zg30  
TD 65536  
SOLVENT DMSO  
NS 16  
DS 2  
SWH 6188.119 Hz  
FIDRES 0.094423 Hz  
AQ 5.2953587 sec  
RG 181  
DW 80.800 usec  
DE 10.00 usec  
TE 298.2 K  
D1 1.00000000 sec  
TD0 1

100

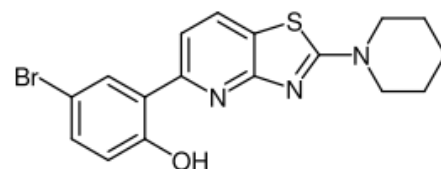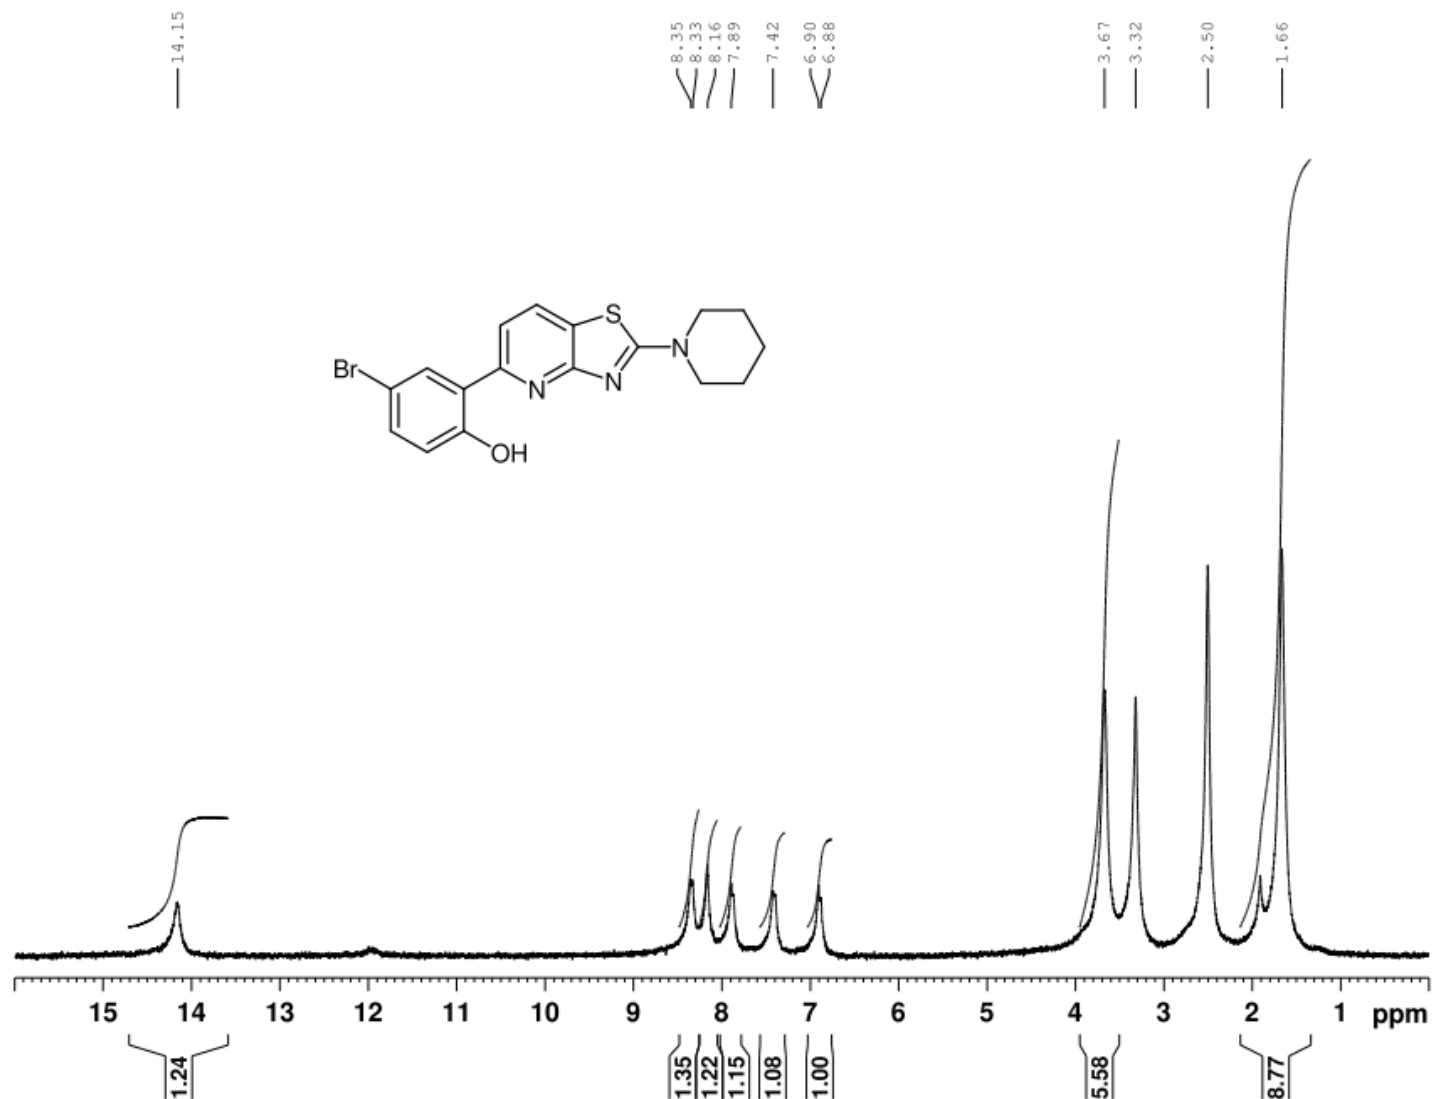

===== CHANNEL f1 =====  
NUC1 1H  
P1 10.00 usec  
PL1 0.00 dB  
PL1W 11.25325108 W  
SFO1 300.1318534 MHz  
SI 32768  
SF 300.1300245 MHz  
WDW EM  
SSB 0  
LB 0.30 Hz  
GB 0  
PC 1.00



Gevorgyan AG148(4) 1H CDC13

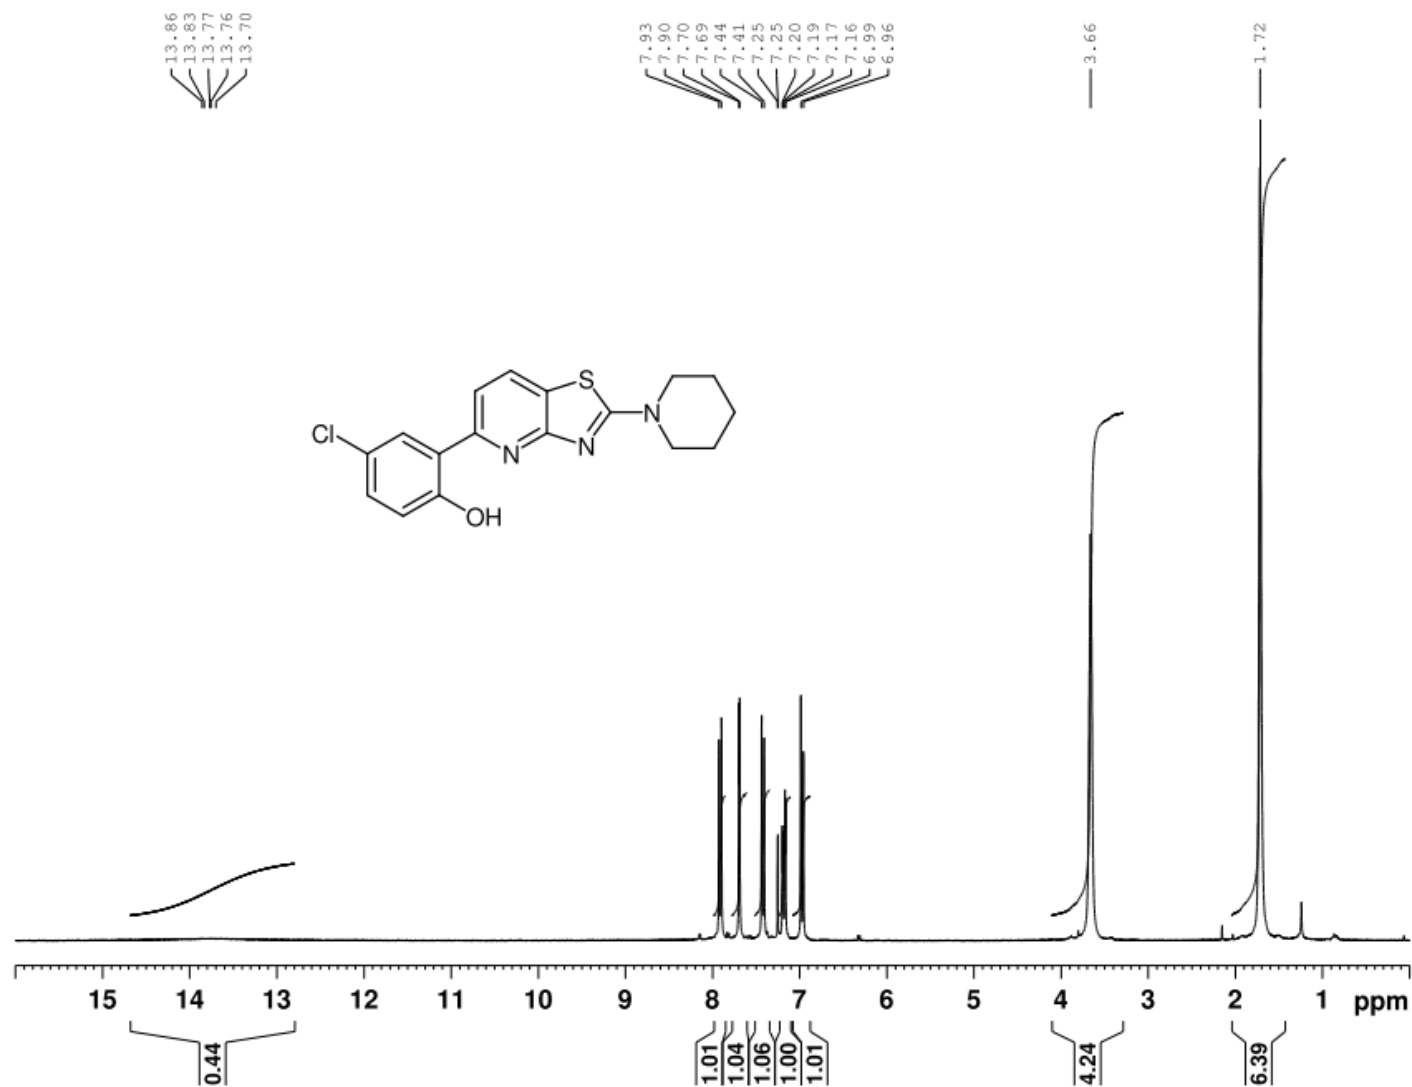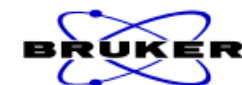

NAME 110121.u312 ag 148  
EXPNO 10  
PROCNO 1  
Date\_ 20110121  
Time 9.51  
INSTRUM spect  
PROBHD 5 mm PABBO BB-  
PULPROG zg30  
TD 65536  
SOLVENT CDCl3  
NS 16  
DS 2  
SWH 6188.119 Hz  
FIDRES 0.094423 Hz  
AQ 5.2953587 sec  
RG 114  
DW 80.800 usec  
DE 10.00 usec  
TE 298.2 K  
D1 1.00000000 sec  
TD0 1

===== CHANNEL f1 =====  
NUC1 1H  
P1 10.00 usec  
PL1 0.00 dB  
PL1W 11.25325108 W  
SFO1 300.1318534 MHz  
SI 32768  
SF 300.1300109 MHz  
WDW EM  
SSB 0  
LB 0.30 Hz  
GB 0  
PC 1.00

Gevorgyan AG148 (4) 13C CDC13

170.65  
161.44  
158.05  
153.01  
130.45  
130.29  
125.93  
123.42  
123.26  
120.43  
119.90  
111.34

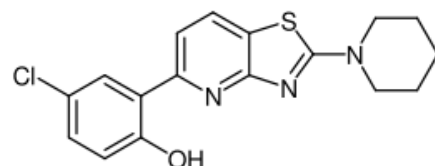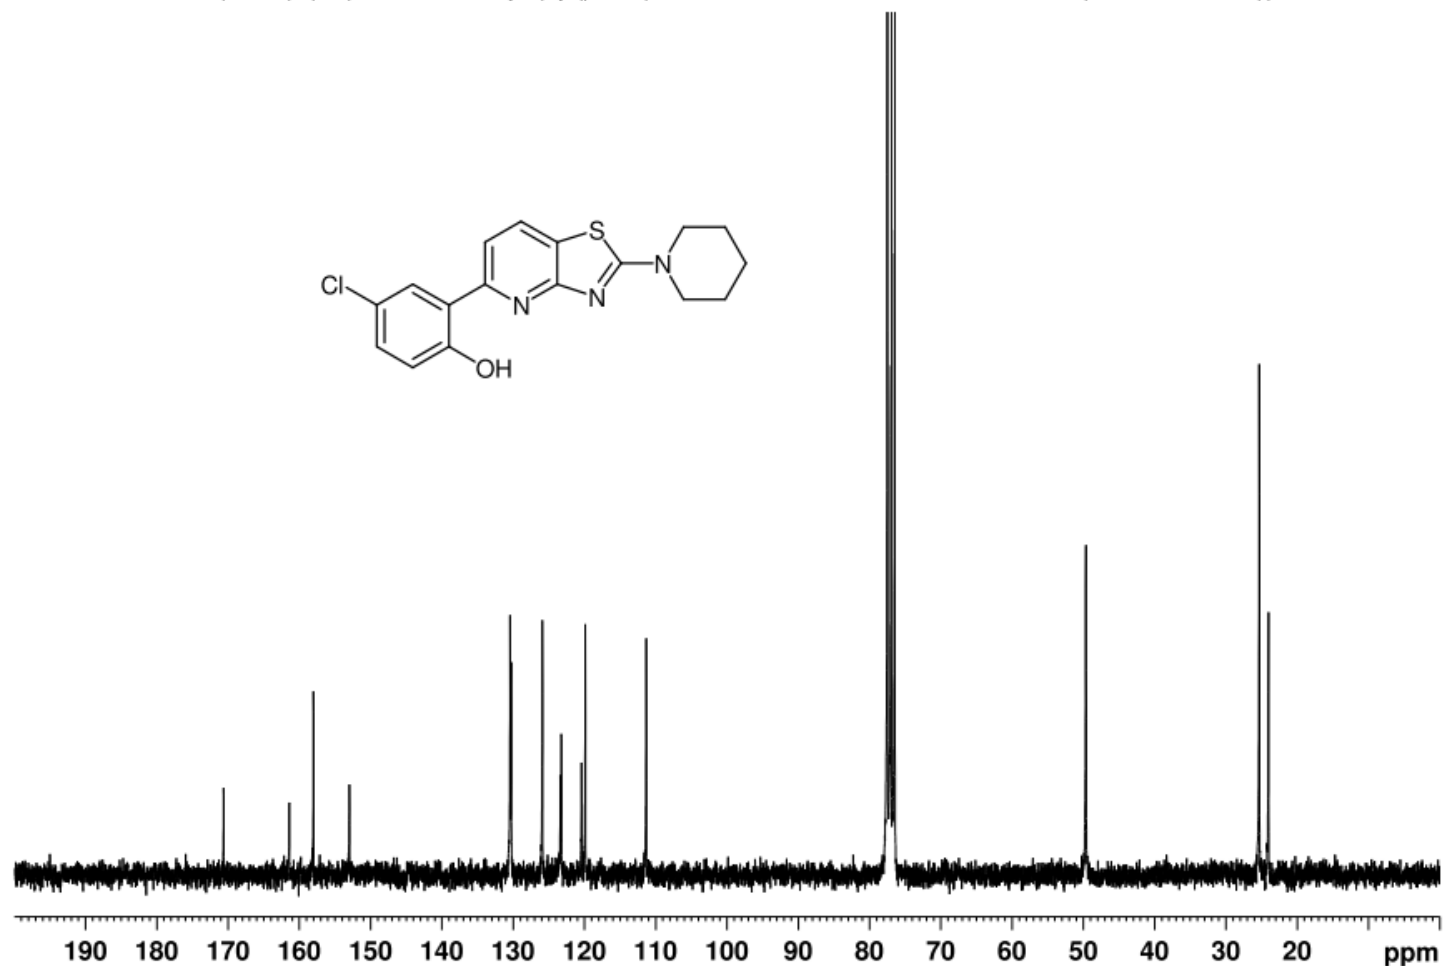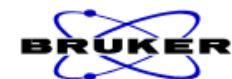

NAME 110127.209 ag 148 C  
EXPNO 10  
PROCNO 1  
Date\_ 20110128  
Time 1.07  
INSTRUM spect  
PROBHD 5 mm PABBO BB-  
PULPROG zgpg30  
TD 65536  
SOLVENT CDC13  
NS 1600  
DS 4  
SWH 15000.000 Hz  
FIDRES 0.228882 Hz  
AQ 2.1845834 sec  
RG 2050  
DW 33.333 usec  
DE 10.00 usec  
TE 297.9 K  
D1 2.00000000 sec  
d11 0.03000000 sec  
DELTA 1.89999998 sec  
TD0 1

===== CHANNEL f1 =====  
NUC1 13C  
P1 10.00 usec  
PL1 -1.00 dB  
SFO1 62.9015280 MHz

===== CHANNEL f2 =====  
CPDPRG2 waltz16  
NUC2 1H  
PCPD2 70.00 usec  
PL12 15.00 dB  
PL13 15.00 dB  
PL2 -2.50 dB  
SFO2 250.1310005 MHz  
SI 32768  
SF 62.8952406 MHz  
WDW EM  
SSB 0  
LB 1.00 Hz  
GB 0  
PC 1.40

Gevorgyan AG151 1H DMSO

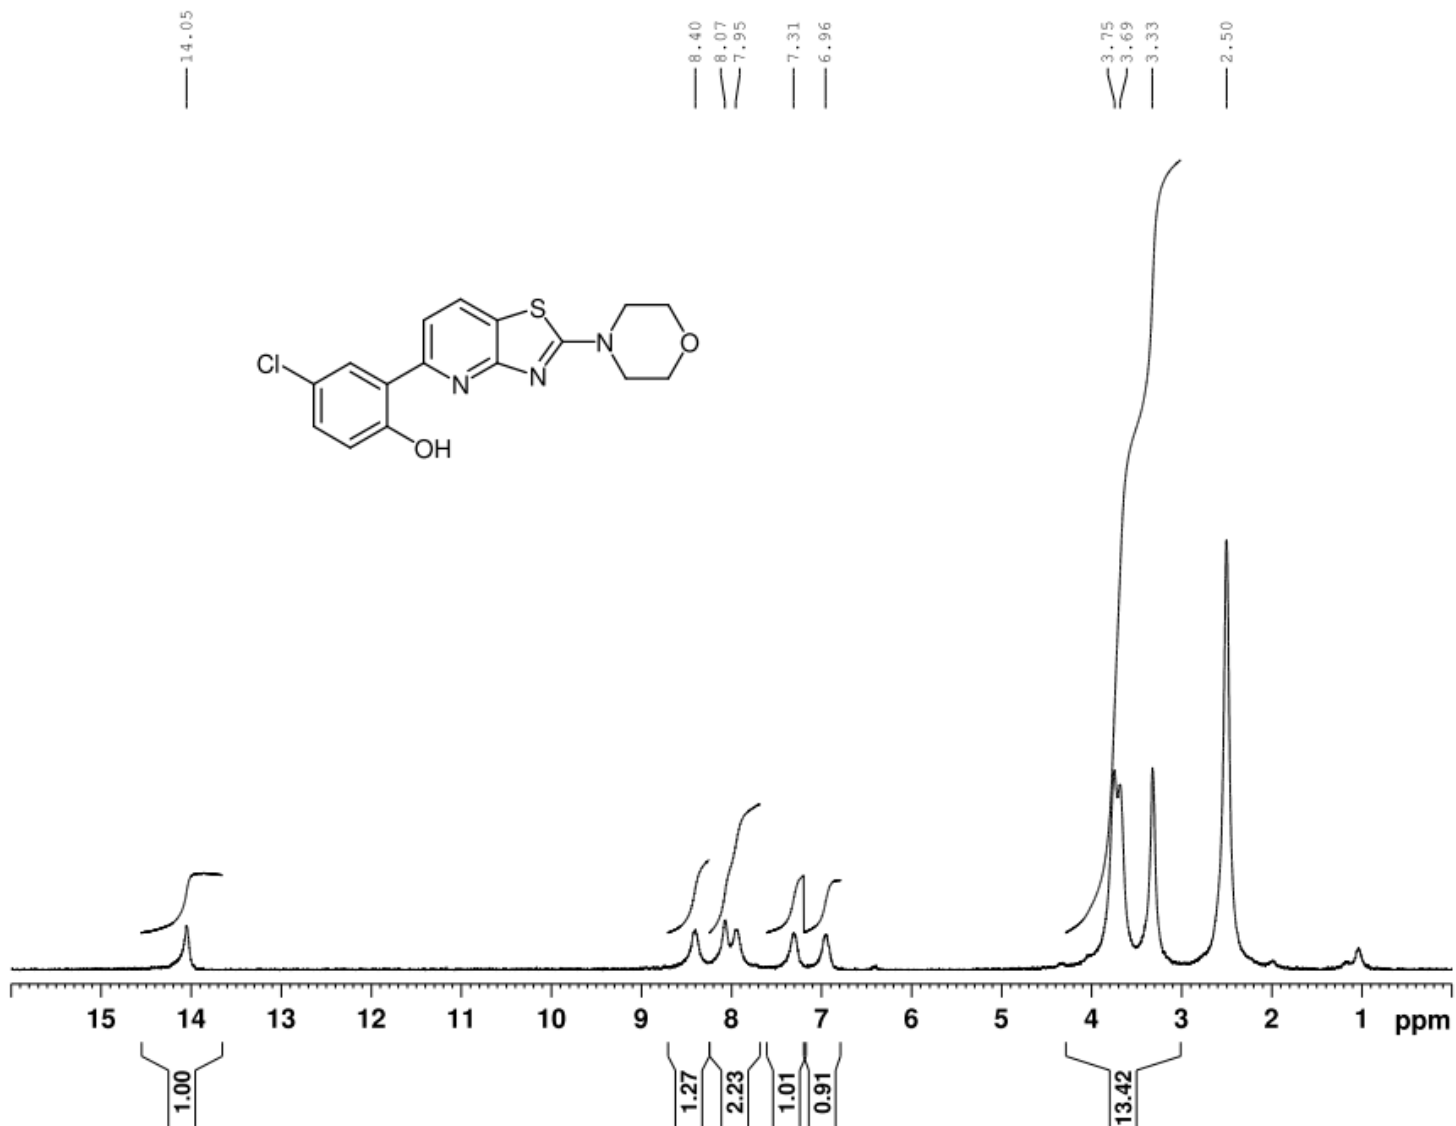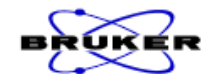

NAME 110118.207 ag 151  
EXPNO 10  
PROCNO 1  
Date\_ 20110118  
Time 9.39  
INSTRUM spect  
PROBHD 5 mm PABBO BB-  
PULPROG zg30  
TD 65536  
SOLVENT DMSO  
NS 16  
DS 2  
SWH 5165.289 Hz  
FIDRES 0.078816 Hz  
AQ 6.3439350 sec  
RG 645  
DW 96.800 usec  
DE 10.00 usec  
TE 297.9 K  
D1 1.00000000 sec  
TD0 1

===== CHANNEL f1 =====  
NUC1 1H  
P1 10.00 usec  
PL1 -2.50 dB  
SFO1 250.1315447 MHz  
SI 32768  
SF 250.1299955 MHz  
WDW EM  
SSB 0  
LB 0.30 Hz  
GB 0  
PC 1.00

Gevorgyan AG151 13C DMSO

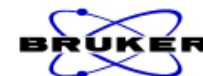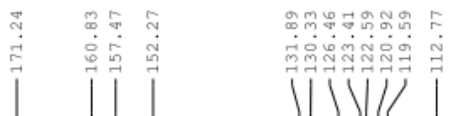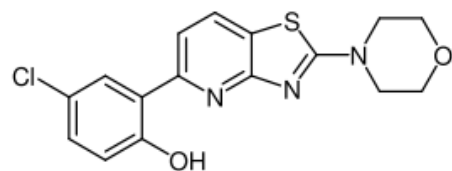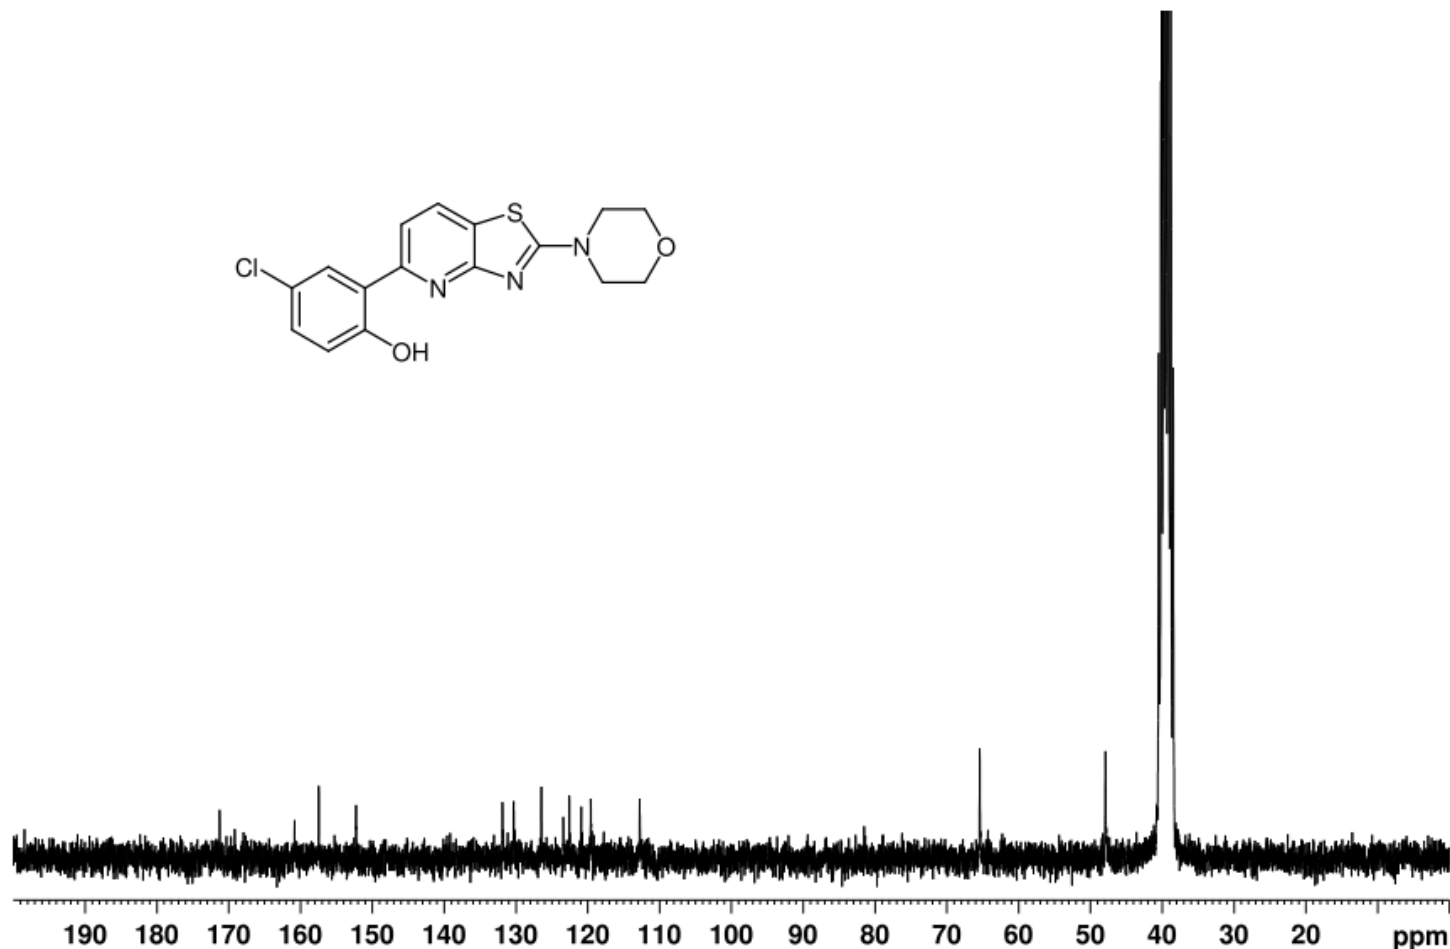

NAME 110121.224 ag 151 C  
EXPNO 10  
PROCNO 1  
Date\_ 20110123  
Time 6.26  
INSTRUM spect  
PROBHD 5 mm PABBO BB-  
PULPROG zgpg30  
TD 65536  
SOLVENT DMSO  
NS 3072  
DS 4  
SWH 15000.000 Hz  
FIDRES 0.228882 Hz  
AQ 2.1845834 sec  
RG 2050  
DW 33.333 usec  
DE 10.00 usec  
TE 297.9 K  
D1 2.00000000 sec  
d11 0.03000000 sec  
DELTA 1.89999998 sec  
TD0 1

===== CHANNEL f1 =====  
NUC1 13C  
P1 10.00 usec  
PL1 -1.00 dB  
SFO1 62.9015280 MHz

===== CHANNEL f2 =====  
CPDPRG2 waltz16  
NUC2 1H  
PCPD2 70.00 usec  
PL12 15.00 dB  
PL13 15.00 dB  
PL2 -2.50 dB  
SFO2 250.1310005 MHz  
SI 32768  
SF 62.8952693 MHz  
WDW EM  
SSB 0  
LB 1.00 Hz  
GB 0  
PC 1.40

Gevorgyan AG156 1H DMSO

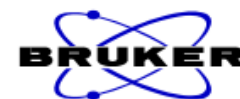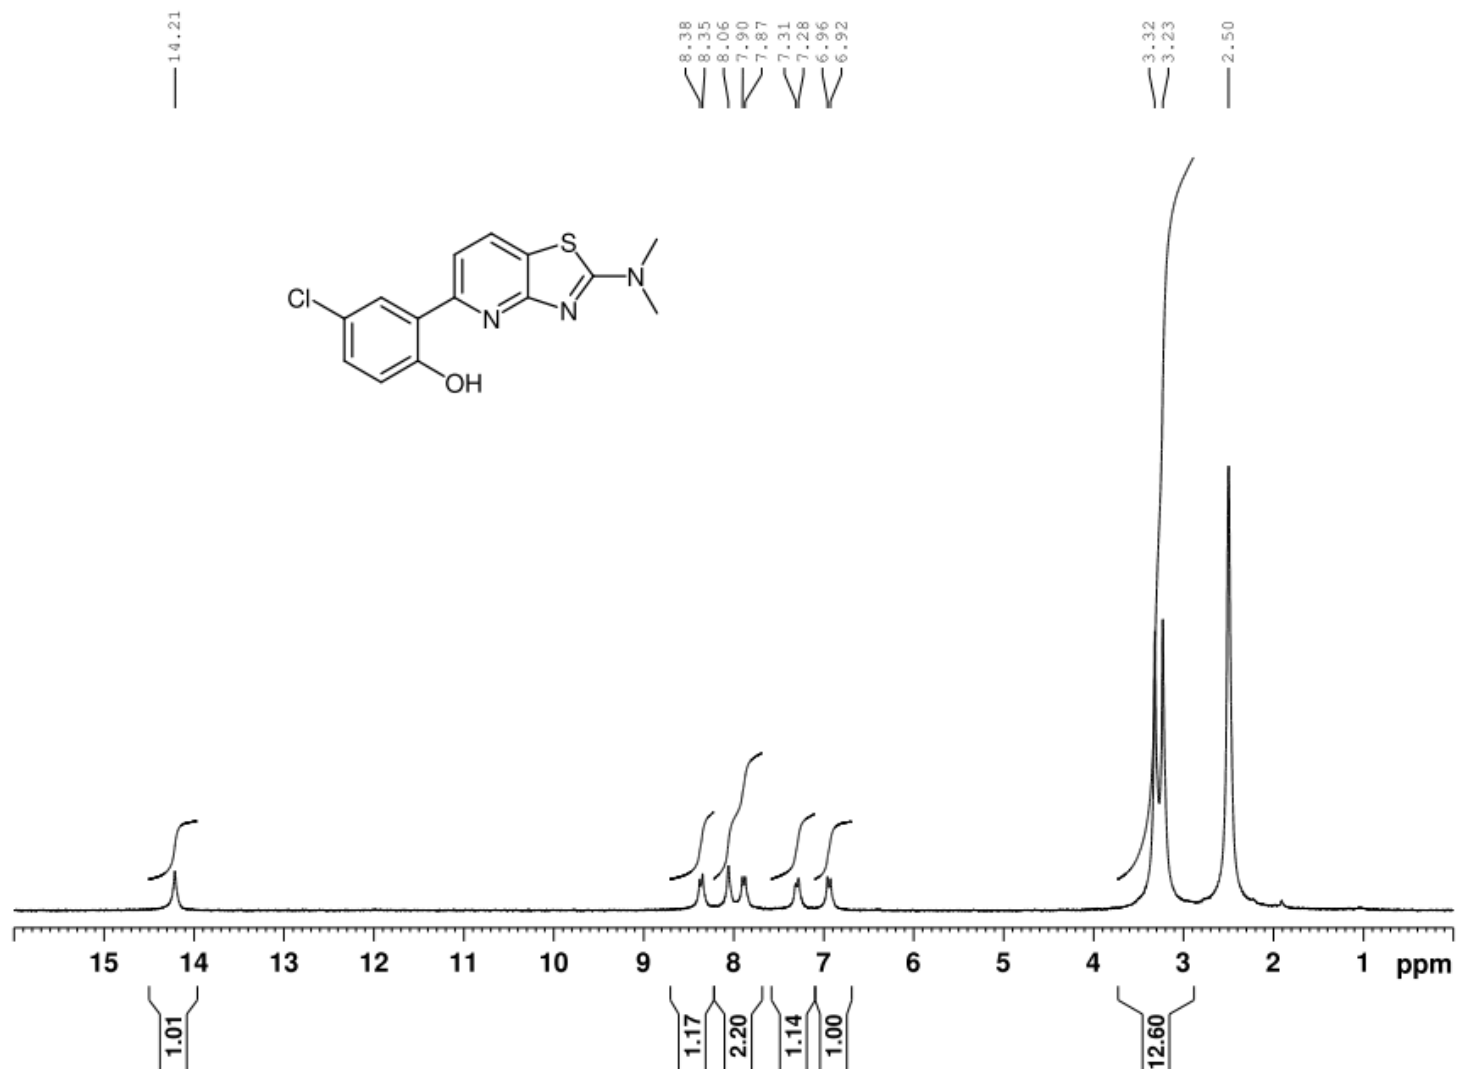

NAME 110119.209 ag 156  
EXPNO 10  
PROCNO 1  
Date\_ 20110119  
Time 9.55  
INSTRUM spect  
PROBHD 5 mm PABBO BB-  
PULPROG zg30  
TD 65536  
SOLVENT DMSO  
NS 24  
DS 2  
SWH 5165.289 Hz  
FIDRES 0.078816 Hz  
AQ 6.3439350 sec  
RG 812  
DW 96.800 usec  
DE 10.00 usec  
TE 298.1 K  
D1 1.0000000 sec  
TD0 1

----- CHANNEL f1 -----  
NUC1 1H  
P1 10.00 usec  
PL1 -2.50 dB  
SFO1 250.1315447 MHz  
SI 32768  
SF 250.1299978 MHz  
WDW EM  
SSB 0  
LB 0.30 Hz  
GB 0  
PC 1.00

Gevorgyan AG156 13C DMSO

157.57  
152.09  
131.64  
130.27  
126.35  
123.97  
122.52  
120.86  
119.59  
112.07

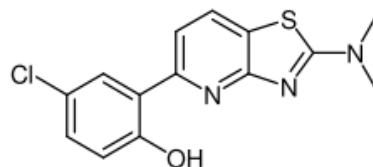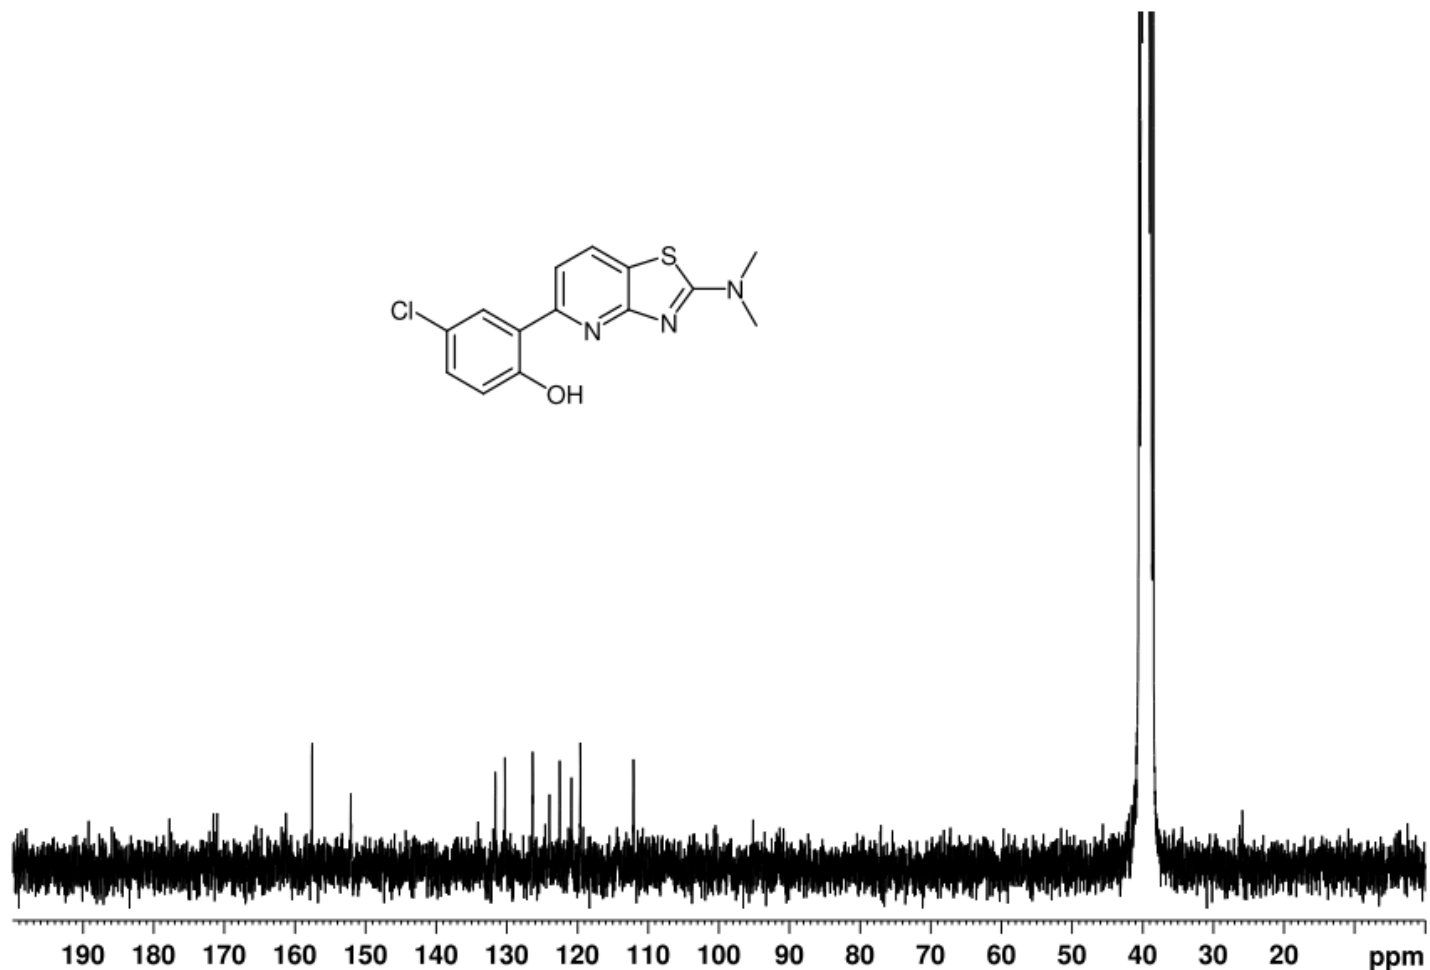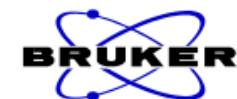

NAME 110121.225 ag 156 C  
EXPNO 10  
PROCNO 1  
Date\_ 20110123  
Time 13.31  
INSTRUM spect  
PROBHD 5 mm PABBO BB-  
PULPROG zgpg30  
TD 65536  
SOLVENT DMSO  
NS 5120  
DS 4  
SWH 15000.000 Hz  
FIDRES 0.228882 Hz  
AQ 2.1845834 sec  
RG 2050  
DW 33.333 usec  
DE 10.00 usec  
TE 297.9 K  
D1 2.00000000 sec  
d11 0.03000000 sec  
DELTA 1.89999998 sec  
TD0 1

===== CHANNEL f1 =====  
NUC1 13C  
P1 10.00 usec  
PL1 -1.00 dB  
SFO1 62.9015280 MHz

===== CHANNEL f2 =====  
CPDPRG2 waltz16  
NUC2 1H  
PCPD2 70.00 usec  
PL12 15.00 dB  
PL13 15.00 dB  
PL2 -2.50 dB  
SFO2 250.1310005 MHz  
SI 32768  
SF 62.8952693 MHz  
WDW EM  
SSB 0  
LB 1.00 Hz  
GB 0  
PC 1.40

Gevorgyan AG166 1H DMSO

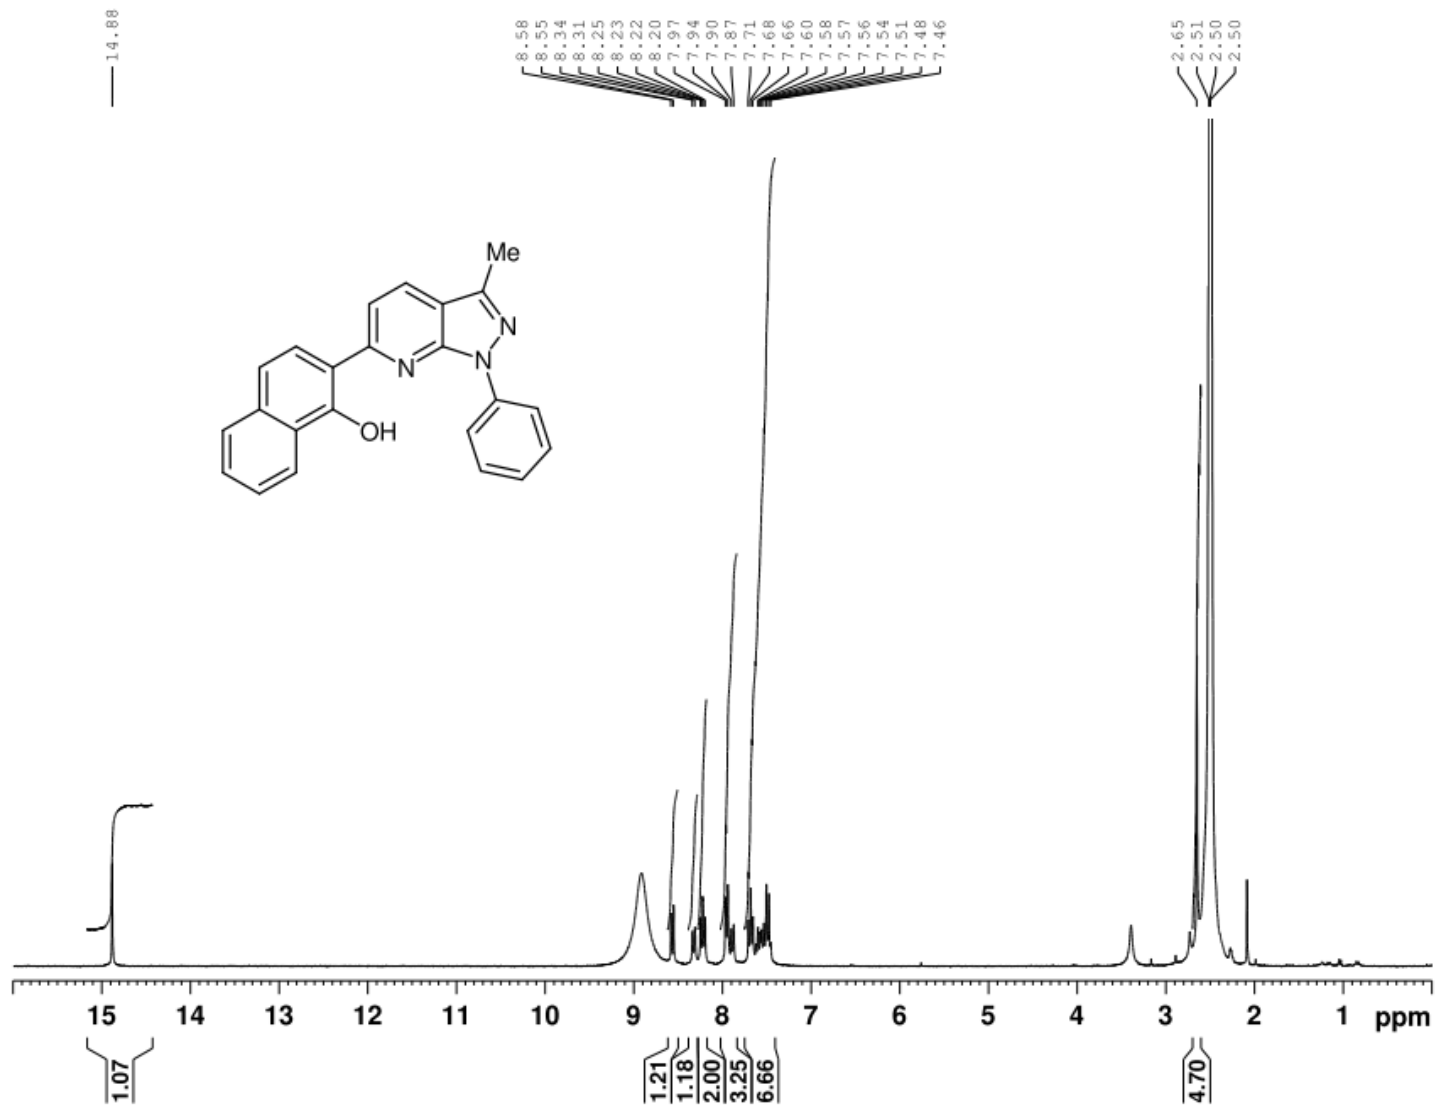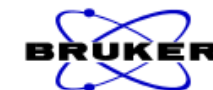

NAME 110131.u327 ag 166  
EXPNO 10  
PROCNO 1  
Date\_ 20110131  
Time 11.54  
INSTRUM spect  
PROBHD 5 mm PABBO BB-  
PULPROG zg30  
TD 65536  
SOLVENT DMSO  
NS 16  
DS 2  
SWH 6188.119 Hz  
FIDRES 0.094423 Hz  
AQ 5.2953587 sec  
RG 128  
DW 80.800 usec  
DE 10.00 usec  
TE 298.2 K  
D1 1.00000000 sec  
TD0 1

----- CHANNEL f1 -----  
NUC1 1H  
P1 10.00 usec  
PL1 0.00 dB  
PL1W 11.25325108 W  
SFO1 300.1318534 MHz  
SI 32768  
SF 300.1300059 MHz  
WDW EM  
SSB 0  
LB 0.30 Hz  
GB 0  
PC 1.00

Gevorgyan AG166 (A) 13C DMSO

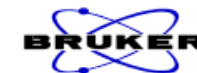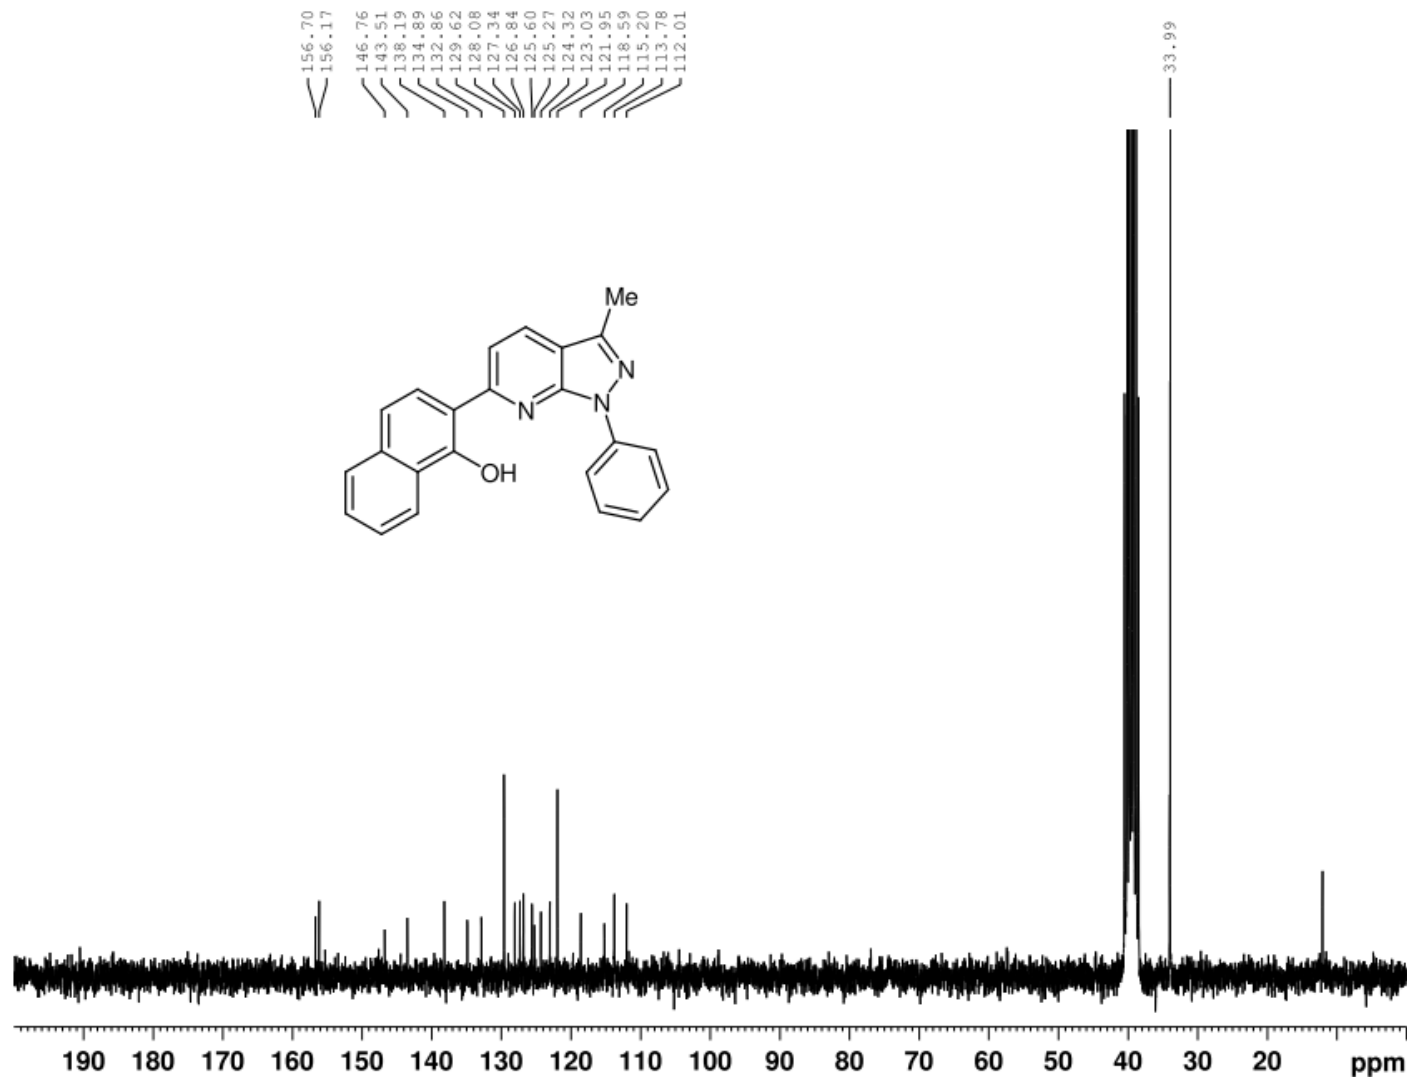

NAME 110324.212 ag 166 C  
EXPNO 10  
PROCNO 1  
Date\_ 20110325  
Time 5.49  
INSTRUM spect  
PROBHD 5 mm PABBO BB-  
PULPROG zgpg30  
TD 65536  
SOLVENT DMSO  
NS 1600  
DS 4  
SWH 15000.000 Hz  
FIDRES 0.228882 Hz  
AQ 2.1845834 sec  
RG 2050  
DW 33.333 usec  
DE 10.00 usec  
TE 298.2 K  
D1 2.00000000 sec  
d11 0.03000000 sec  
DELTA 1.89999998 sec  
TD0 1

===== CHANNEL f1 =====  
NUC1 13C  
P1 10.00 usec  
PL1 -1.00 dB  
SFO1 62.9015280 MHz

===== CHANNEL f2 =====  
CPDPRG2 waltz16  
NUC2 1H  
PCPD2 70.00 usec  
PL12 15.00 dB  
PL13 15.00 dB  
PL2 -2.50 dB  
SFO2 250.1310005 MHz  
SI 32768  
SF 62.8952692 MHz  
WDW EM  
SSB 0  
LB 1.00 Hz  
GB 0  
PC 1.40



Mkrtchyan SM384 1H DMSO

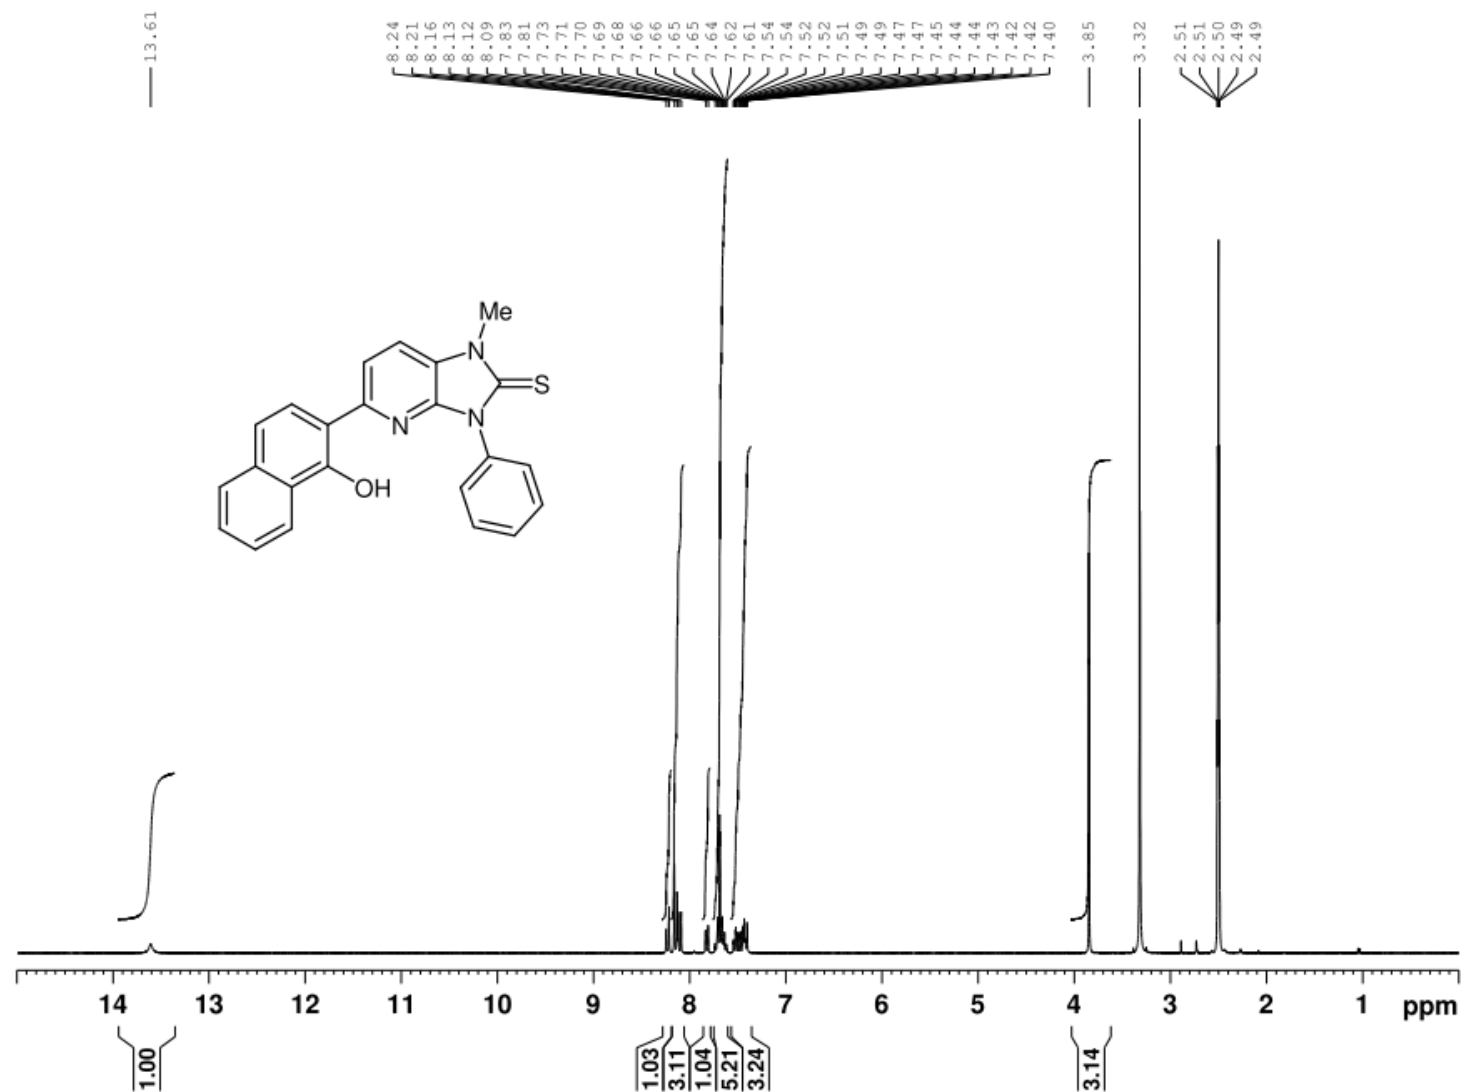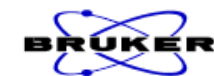

NAME 101214.u338 sm 384  
EXPNO 10  
PROCNO 1  
Date\_ 20101214  
Time 14.31  
INSTRUM spect  
PROBHD 5 mm PABBO BB-  
PULPROG zg30  
TD 65536  
SOLVENT DMSO  
NS 64  
DS 2  
SWH 6188.119 Hz  
FIDRES 0.094423 Hz  
AQ 5.2953587 sec  
RG 287  
DW 80.800 usec  
DE 10.00 usec  
TE 298.2 K  
D1 1.00000000 sec  
TD0 1

----- CHANNEL f1 -----  
NUC1 1H  
P1 10.00 usec  
PL1 0.00 dB  
PL1W 11.25325108 W  
SFO1 300.1318534 MHz  
SI 32768  
SF 300.1300050 MHz  
WDW EM  
SSB 0  
LB 0.30 Hz  
GB 0  
PC 1.00

Gevorgyan AG176 (1) 1H DMSO

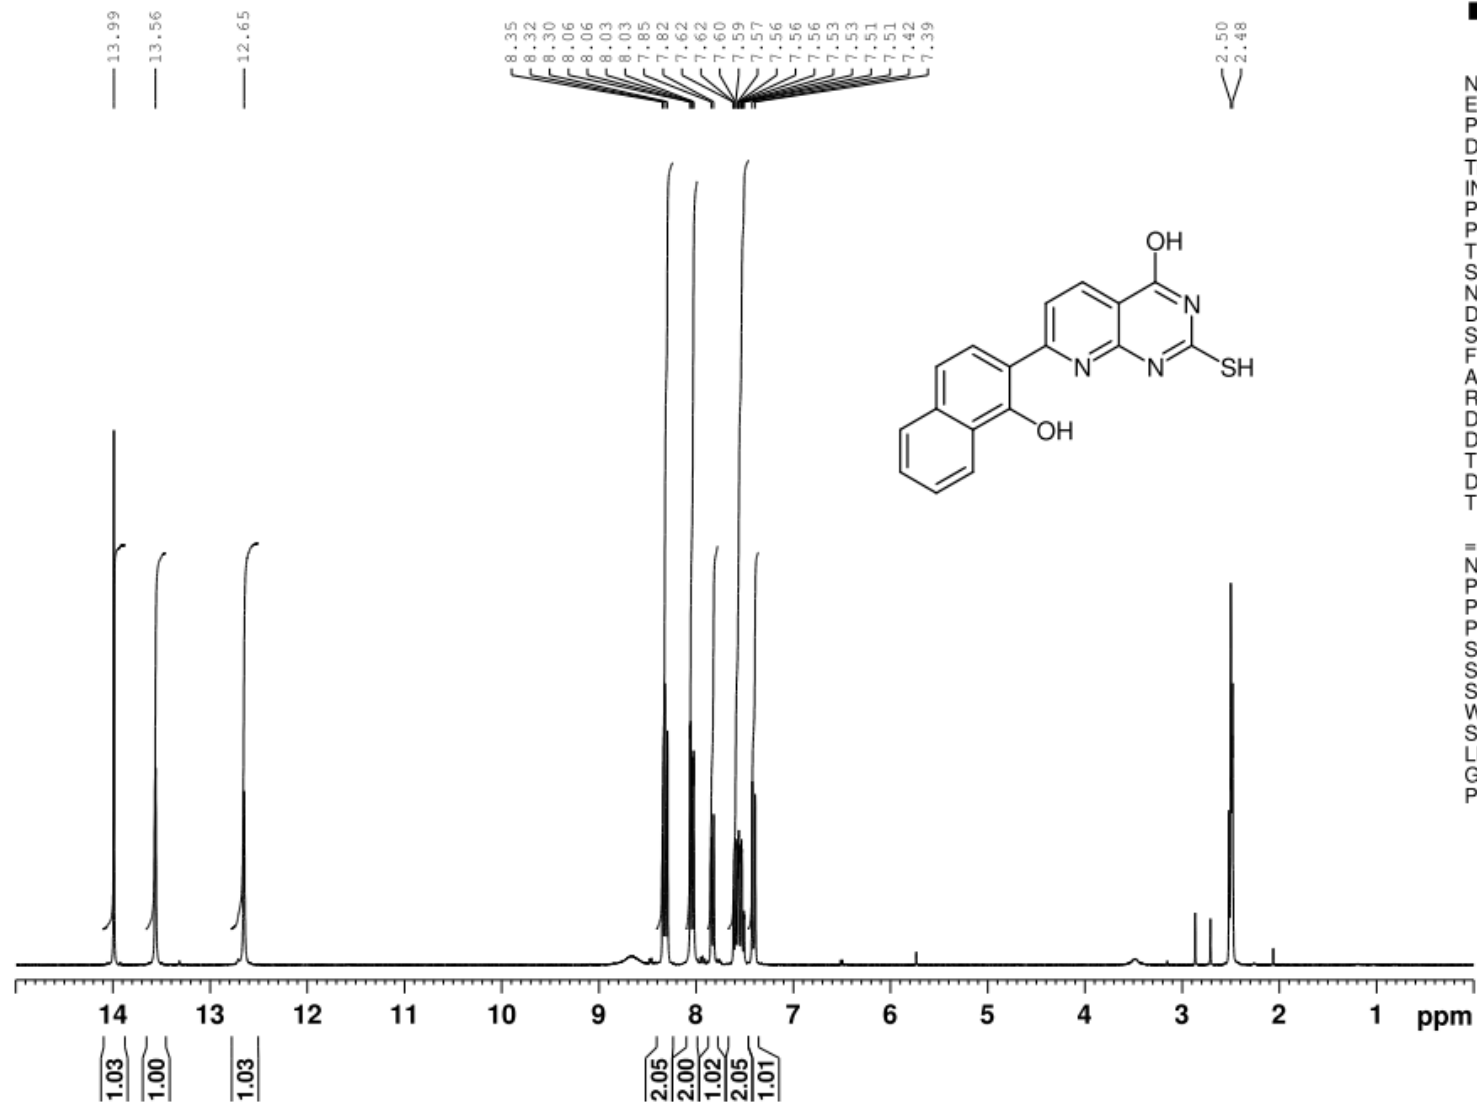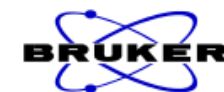

NAME 110218.u310 ag 176  
EXPNO 10  
PROCNO 1  
Date\_ 20110218  
Time 8.40  
INSTRUM spect  
PROBHD 5 mm PABBO BB-  
PULPROG zg30  
TD 65536  
SOLVENT DMSO  
NS 16  
DS 2  
SWH 6188.119 Hz  
FIDRES 0.094423 Hz  
AQ 5.2953587 sec  
RG 144  
DW 80.800 usec  
DE 10.00 usec  
TE 298.2 K  
D1 1.0000000 sec  
TD0 1

----- CHANNEL f1 -----  
NUC1 1H  
P1 10.00 usec  
PL1 0.00 dB  
PL1W 11.25325108 W  
SFO1 300.1318534 MHz  
SI 32768  
SF 300.1300089 MHz  
WDW EM  
SSB 0  
LB 0.30 Hz  
GB 0  
PC 1.00

Gevorgyan AG176 (1) 13C DMSO

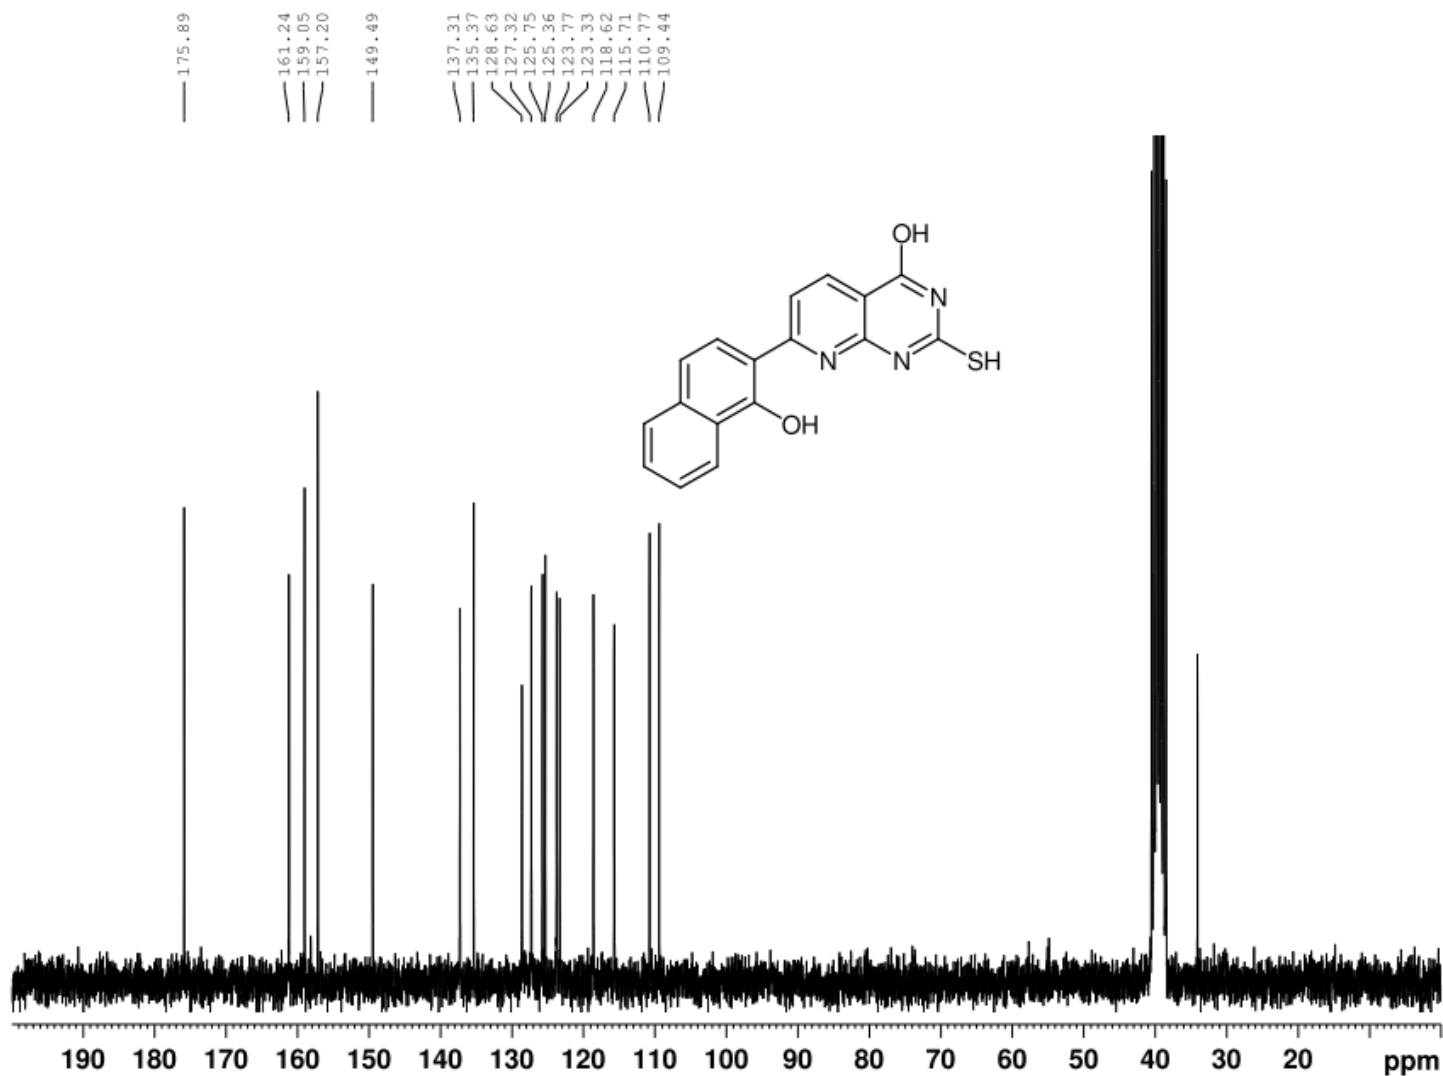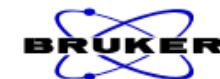

NAME 110221.205 ag 176 C  
EXPNO 10  
PROCNO 1  
Date\_ 20110221  
Time 15.50  
INSTRUM spect  
PROBHD 5 mm PABBO BB-  
PULPROG zgpg30  
TD 65536  
SOLVENT DMSO  
NS 1024  
DS 4  
SWH 15000.000 Hz  
FIDRES 0.228882 Hz  
AQ 2.1845834 sec  
RG 2050  
DW 33.333 usec  
DE 10.00 usec  
TE 298.3 K  
D1 2.0000000 sec  
d11 0.03000000 sec  
DELTA 1.89999998 sec  
TD0 1

===== CHANNEL f1 =====  
NUC1 13C  
P1 10.00 usec  
PL1 -1.00 dB  
SFO1 62.9015280 MHz

===== CHANNEL f2 =====  
CPDPRG2 waltz16  
NUC2 1H  
PCPD2 70.00 usec  
PL12 15.00 dB  
PL13 15.00 dB  
PL2 -2.50 dB  
SFO2 250.1310005 MHz  
SI 32768  
SF 62.8952692 MHz  
WDW EM  
SSB 0  
LB 1.00 Hz  
GB 0  
PC 1.40

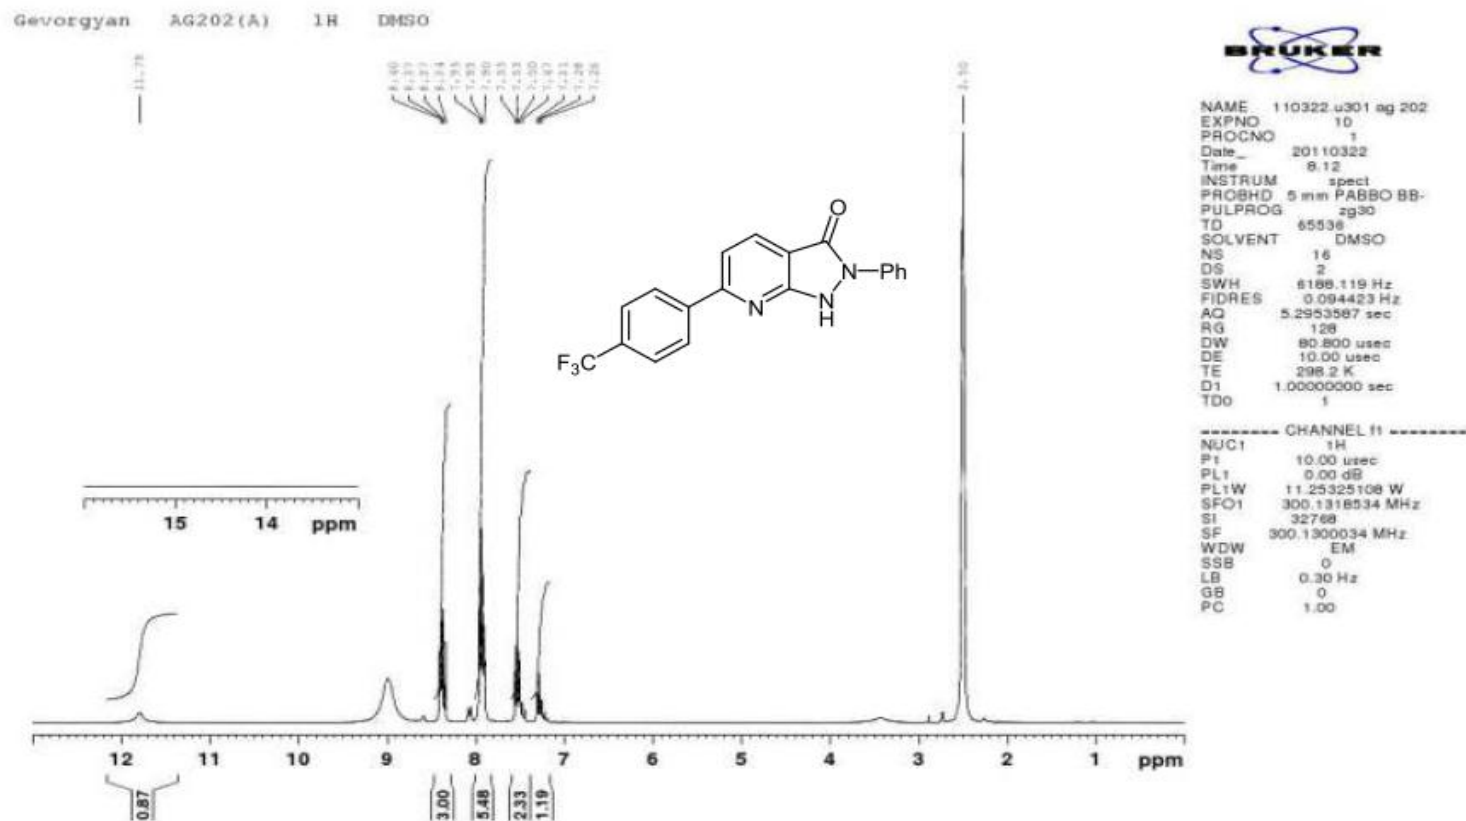



Gevorgyan AG187 1H DMSO

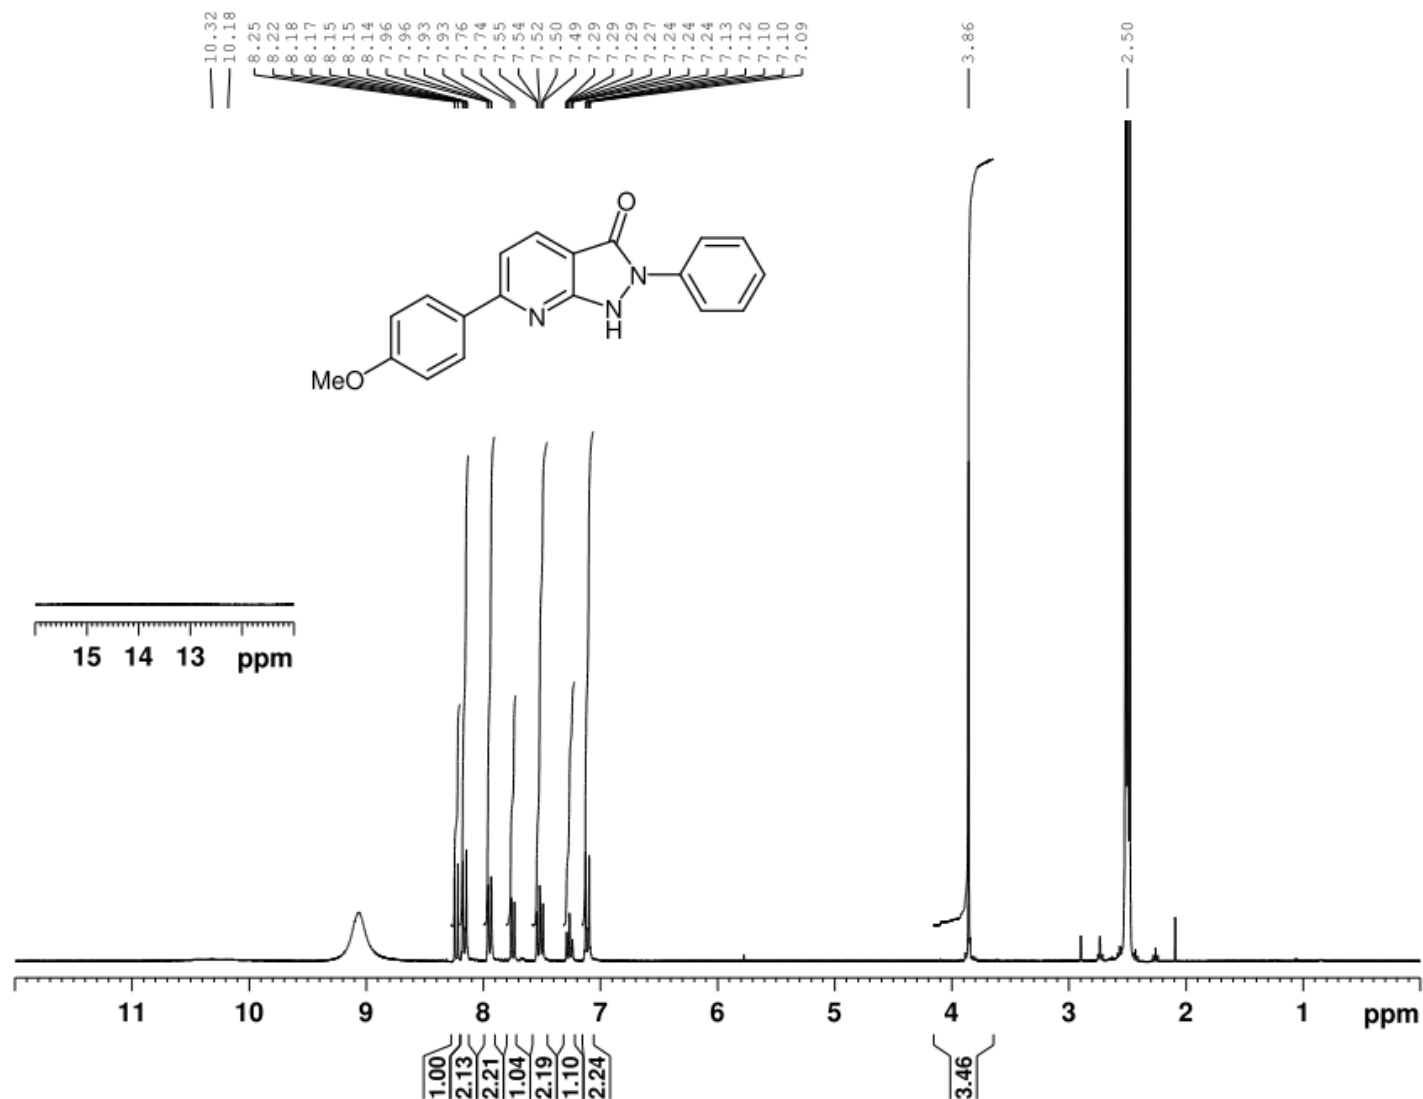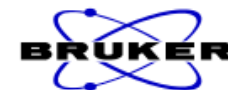

NAME 110221.u316 ag 187  
EXPNO 10  
PROCNO 1  
Date\_ 20110221  
Time 9.57  
INSTRUM spect  
PROBHD 5 mm PABBO BB-  
PULPROG zg30  
TD 65536  
SOLVENT DMSO  
NS 16  
DS 2  
SWH 6188.119 Hz  
FIDRES 0.094423 Hz  
AQ 5.2953587 sec  
RG 101  
DW 80.800 usec  
DE 10.00 usec  
TE 298.2 K  
D1 1.00000000 sec  
TD0 1

===== CHANNEL f1 =====  
NUC1 1H  
P1 10.00 usec  
PL1 0.00 dB  
PL1W 11.25325108 W  
SFO1 300.1318534 MHz  
SI 32768  
SF 300.1299994 MHz  
WDW EM  
SSB 0  
LB 0.30 Hz  
GB 0  
PC 1.00

Gevorgyan AG187 13C DMSO

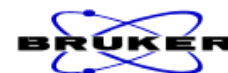

161.09  
159.60  
158.66  
157.42  
137.38  
134.23  
129.93  
129.01  
128.87  
124.98  
119.29  
114.35  
113.86  
108.48  
105.73  
116.79

55.36

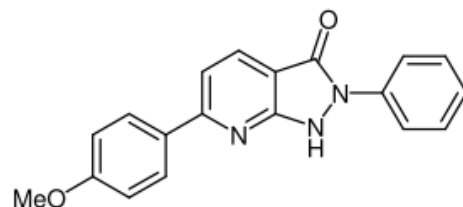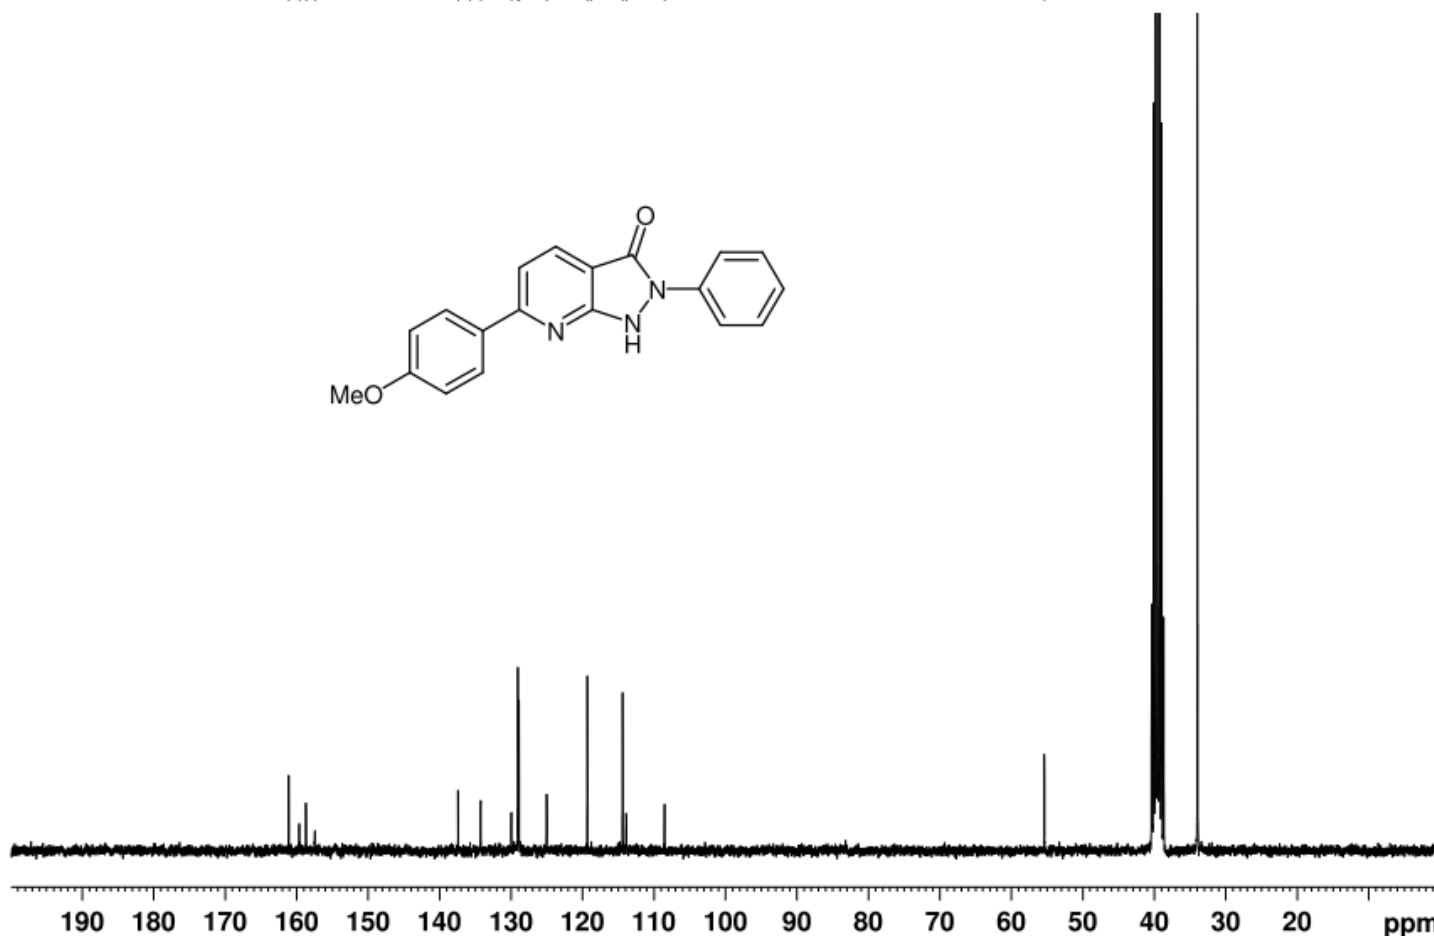

NAME 110224.u348 ag 187 C  
EXPNO 10  
PROCNO 1  
Date\_ 20110224  
Time 22.16  
INSTRUM spect  
PROBHD 5 mm PABBO BB-  
PULPROG zgpg30  
TD 65536  
SOLVENT DMSO  
NS 1024  
DS 4  
SWH 18028.846 Hz  
FIDRES 0.275098 Hz  
AQ 1.8175818 sec  
RG 2050  
DW 27.733 usec  
DE 10.00 usec  
TE 298.2 K  
D1 2.00000000 sec  
D11 0.03000000 sec  
TD0 1

===== CHANNEL f1 =====  
NUC1 13C  
P1 10.00 usec  
PL1 -0.50 dB  
PL1W 33.25691986 W  
SFO1 75.4752953 MHz

===== CHANNEL f2 =====  
CPDPRG2 waltz16  
NUC2 1H  
PCPD2 72.00 usec  
PL2 0.00 dB  
PL12 17.00 dB  
PL13 17.00 dB  
PL2W 11.25325108 W  
PL12W 0.22453187 W  
PL13W 0.22453187 W  
SFO2 300.1312005 MHz  
SI 32768  
SF 75.4677859 MHz  
WDW EM  
SSB 0  
LB 1.00 Hz  
GB 0  
PC 1.40

Mkrtchyan, SM 508, DMSO, 1H

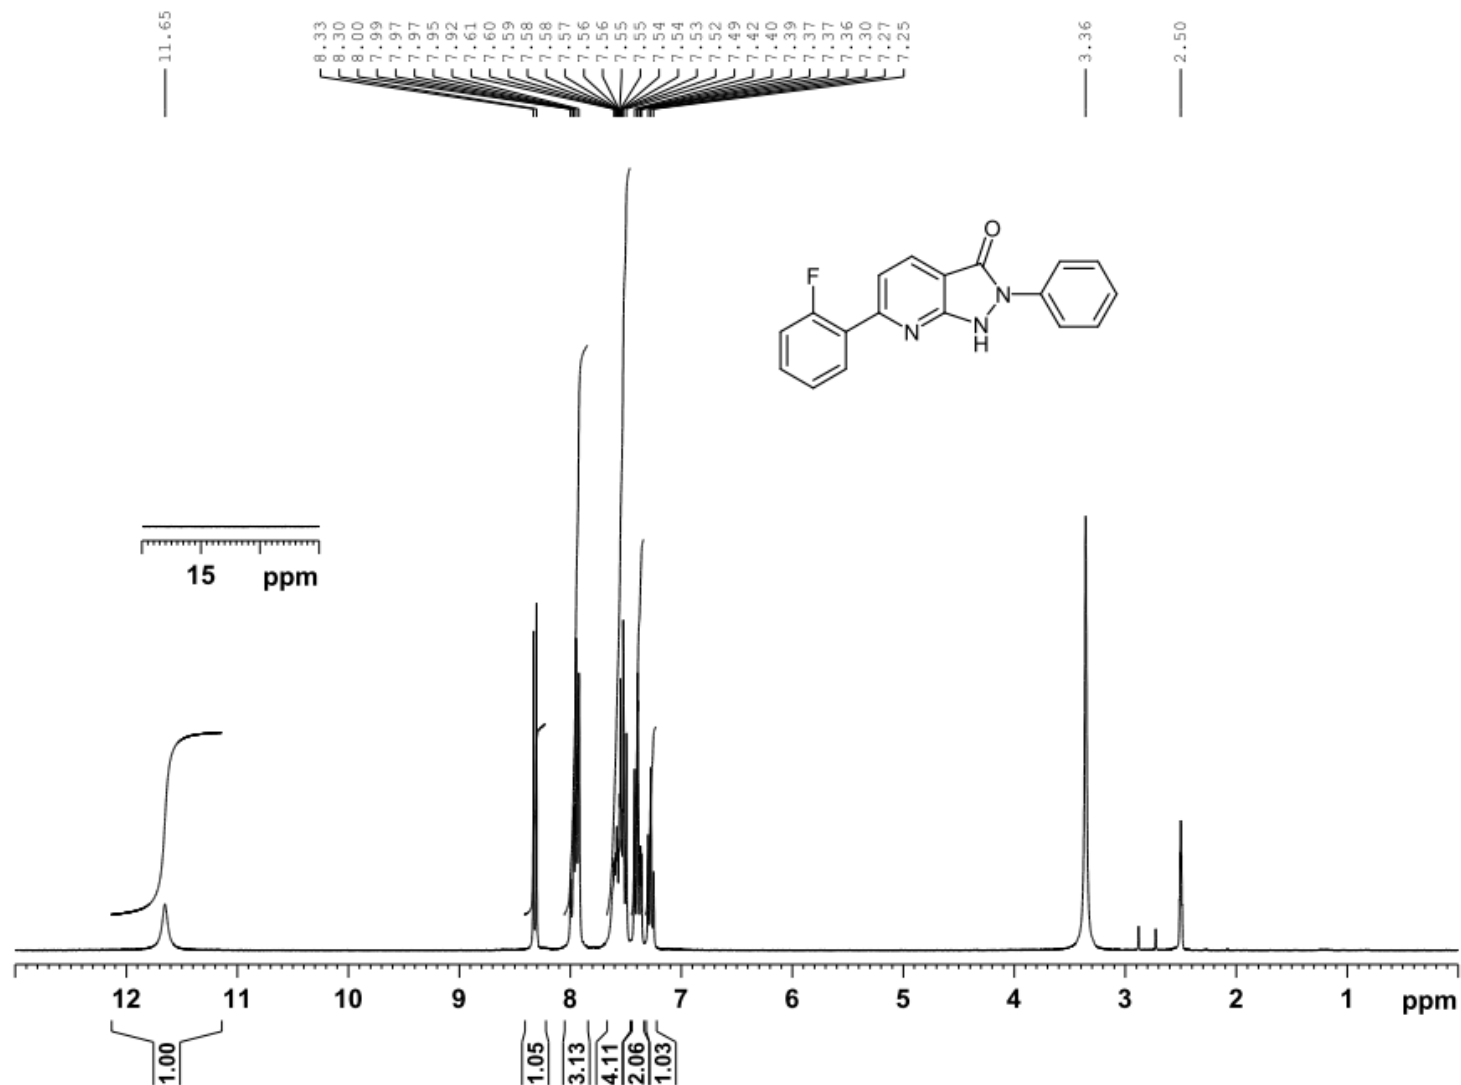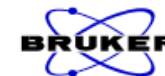

Current Data Parameters  
NAME 110701.u310 sm 508  
EXPNO 10  
PROCNO 1

F2 - Acquisition Parameters  
Date\_ 20110701  
Time 9.19  
INSTRUM spect  
PROBHD 5 mm PABBO BB-  
PULPROG zg30  
TD 65536  
SOLVENT DMSO  
NS 16  
DS 2  
SWH 6188.119 Hz  
FIDRES 0.094423 Hz  
AQ 5.2953587 sec  
RG 114  
DW 80.800 usec  
DE 10.00 usec  
TE 298.2 K  
D1 1.00000000 sec  
TD0 1

CHANNEL f1  
NUC1 1H  
P1 10.00 usec  
PL1 0.00 dB  
PL1W 11.25325108 W  
SFO1 300.1318534 MHz

F2 - Processing parameters  
SI 32768  
SF 300.1300068 MHz  
WDW EM  
SSB 0  
LB 0.30 Hz  
GB 0  
PC 1.00



Mkrtchyan, SM 521, DMSO, 1H

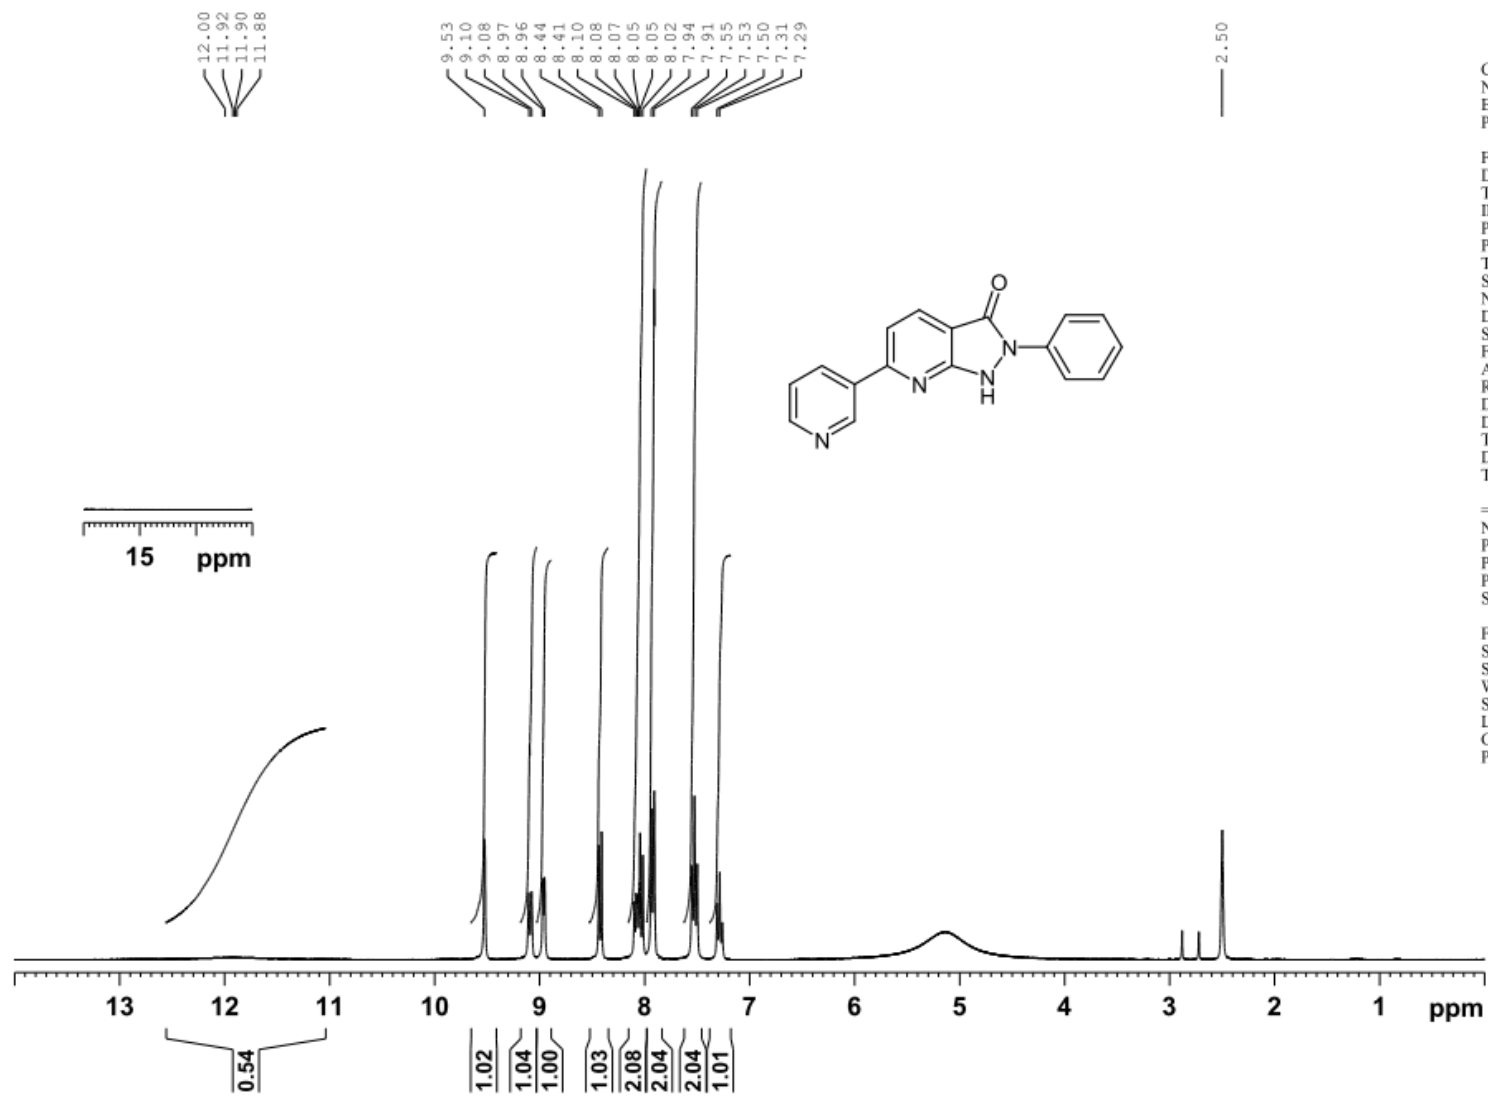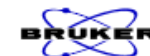

Current Data Parameters  
NAME 110707.u319 sm 521  
EXPNO 10  
PROCNO 1

F2 - Acquisition Parameters  
Date\_ 20110707  
Time 11.30  
INSTRUM spect  
PROBHD 5 mm PABBO BB-  
PULPROG zg30  
TD 65536  
SOLVENT DMSO  
NS 64  
DS 2  
SWH 6188.119 Hz  
FIDRES 0.094423 Hz  
AQ 5.2953587 sec  
RG 144  
DW 80.800 usec  
DE 10.00 usec  
TE 298.2 K  
D1 1.0000000 sec  
TD0 1

CHANNEL f1  
NUC1 1H  
P1 10.00 usec  
PL1 0.00 dB  
PL1W 11.25325108 W  
SFO1 300.1318534 MHz

F2 - Processing parameters  
SI 32768  
SF 300.1300092 MHz  
WDW EM  
SSB 0  
LB 0.30 Hz  
GB 0  
PC 1.00

Mkrtchyan SM521 13C CF3COOD/DMSO

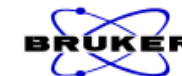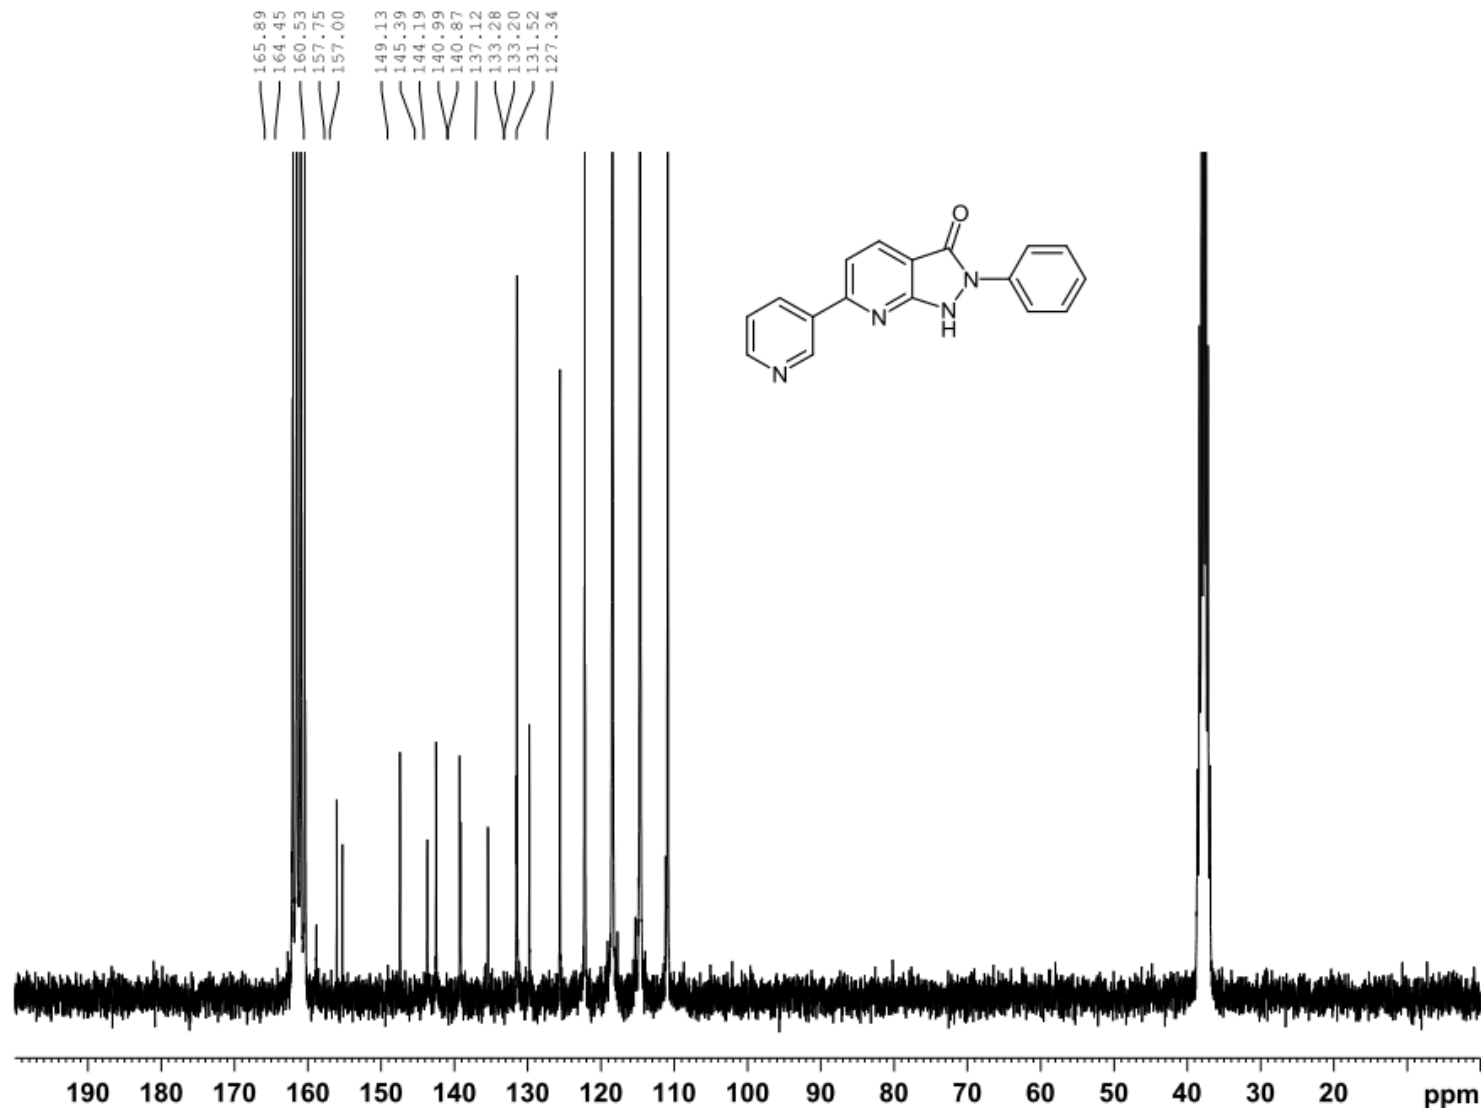

Current Data Parameters  
NAME 110713.u321 sm 521 c  
EXPNO 10  
PROCNO 1

F2 - Acquisition Parameters  
Date\_ 20110713  
Time 23.44  
INSTRUM spect  
PROBHD 5 mm PABBO BB-  
PULPROG zgpg30  
TD 65536  
SOLVENT D2O  
NS 1600  
DS 4  
SWH 18028.846 Hz  
FIDRES 0.275098 Hz  
AQ 1.8175818 sec  
RG 2050  
DW 27.733 usec  
DE 10.00 usec  
TE 298.5 K  
D1 2.0000000 sec  
D11 0.03000000 sec  
TD0 1

CHANNEL f1  
NUC1 13C  
P1 10.00 usec  
PL1 -0.50 dB  
PL1W 33.25691986 W  
SFO1 75.4752953 MHz

CHANNEL f2  
CPDPRG2 waltz16  
NUC2 1H  
PCPD2 72.00 usec  
PL2 0.00 dB  
PL12 17.00 dB  
PL13 17.00 dB  
PL2W 11.25325108 W  
PL12W 0.22453187 W  
PL13W 0.22453187 W  
SFO2 300.1312005 MHz

F2 - Processing parameters  
SI 32768  
SF 75.4677490 MHz  
WDW EM  
SSB 0  
LB 1.00 Hz  
GB 0  
PC 1.40

Mkrtchyan, SM 522, CF3COOD/DMSO, 1H

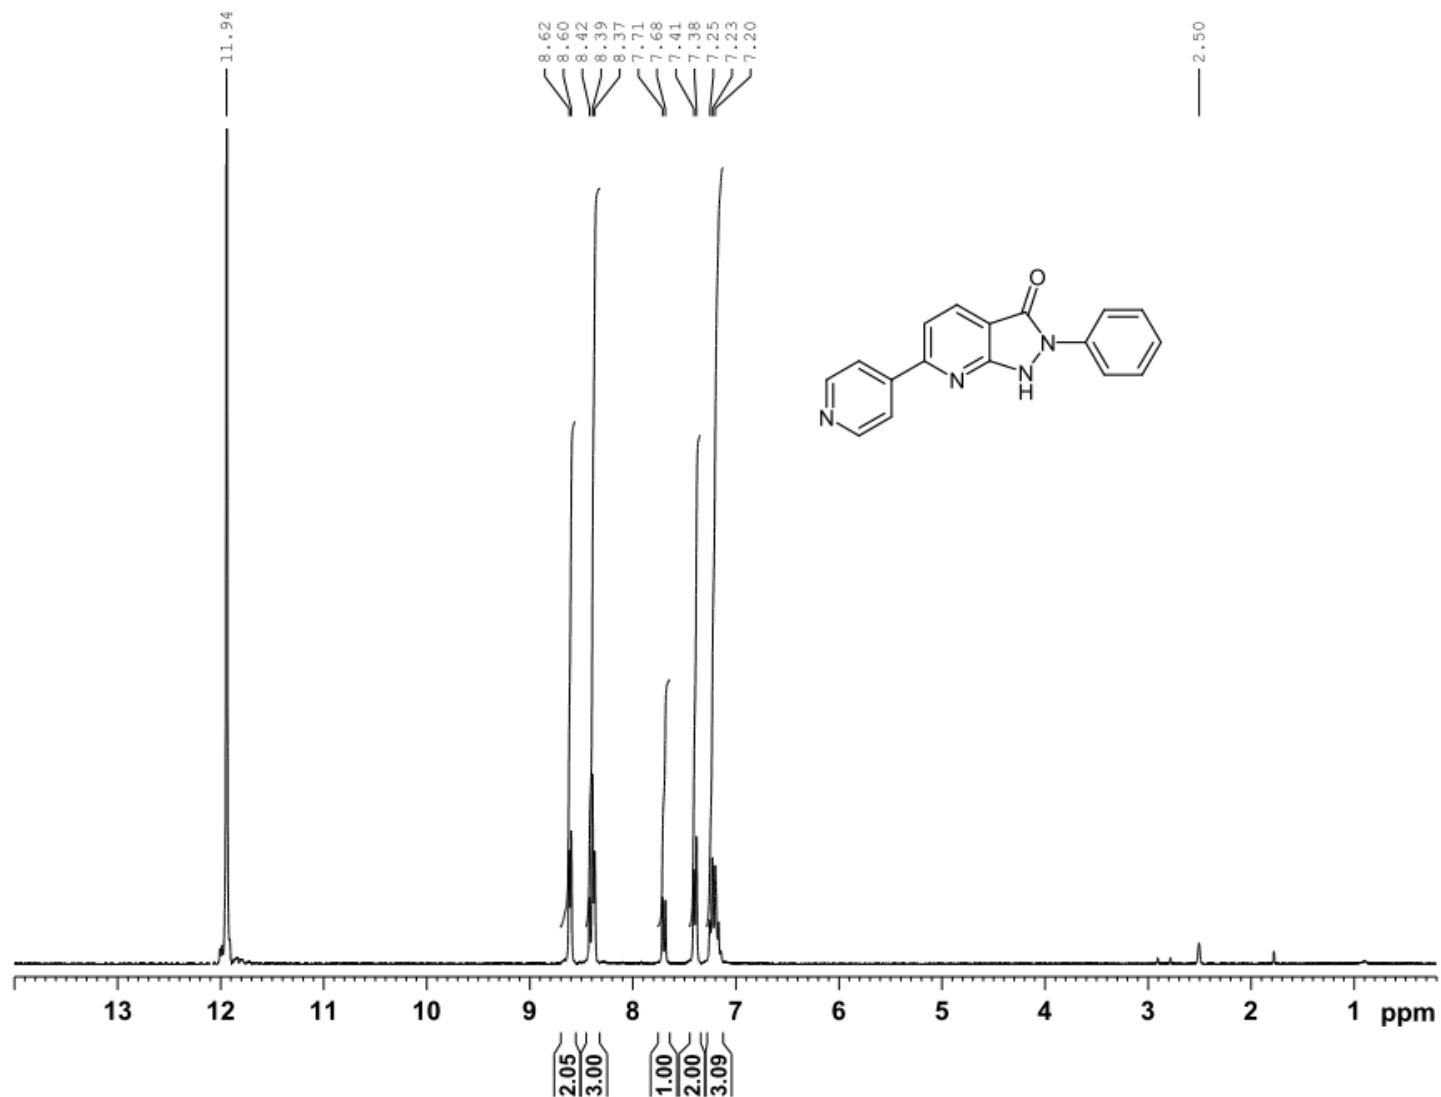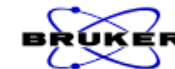

Current Data Parameters  
NAME 110712.u333 sm 522  
EXPNO 10  
PROCNO 1

F2 - Acquisition Parameters  
Date\_ 20110712  
Time 22.57  
INSTRUM spect  
PROBHD 5 mm PABBO BB-  
PULPROG zg30  
TD 65536  
SOLVENT D2O  
NS 16  
DS 2  
SWH 6188.119 Hz  
FIDRES 0.094423 Hz  
AQ 5.2953587 sec  
RG 161  
DW 80.800 usec  
DE 10.00 usec  
TE 298.2 K  
D1 1.00000000 sec  
TD0 1

CHANNEL f1  
NUC1 1H  
P1 10.00 usec  
PL1 0.00 dB  
PL1W 11.25325108 W  
SFO1 300.1318534 MHz

F2 - Processing parameters  
SI 32768  
SF 300.1306778 MHz  
WDW EM  
SSB 0  
LB 0.30 Hz  
GB 0  
PC 1.00

Mkrtchyan SM522 13C CF3COOD/DMSO

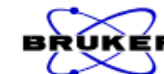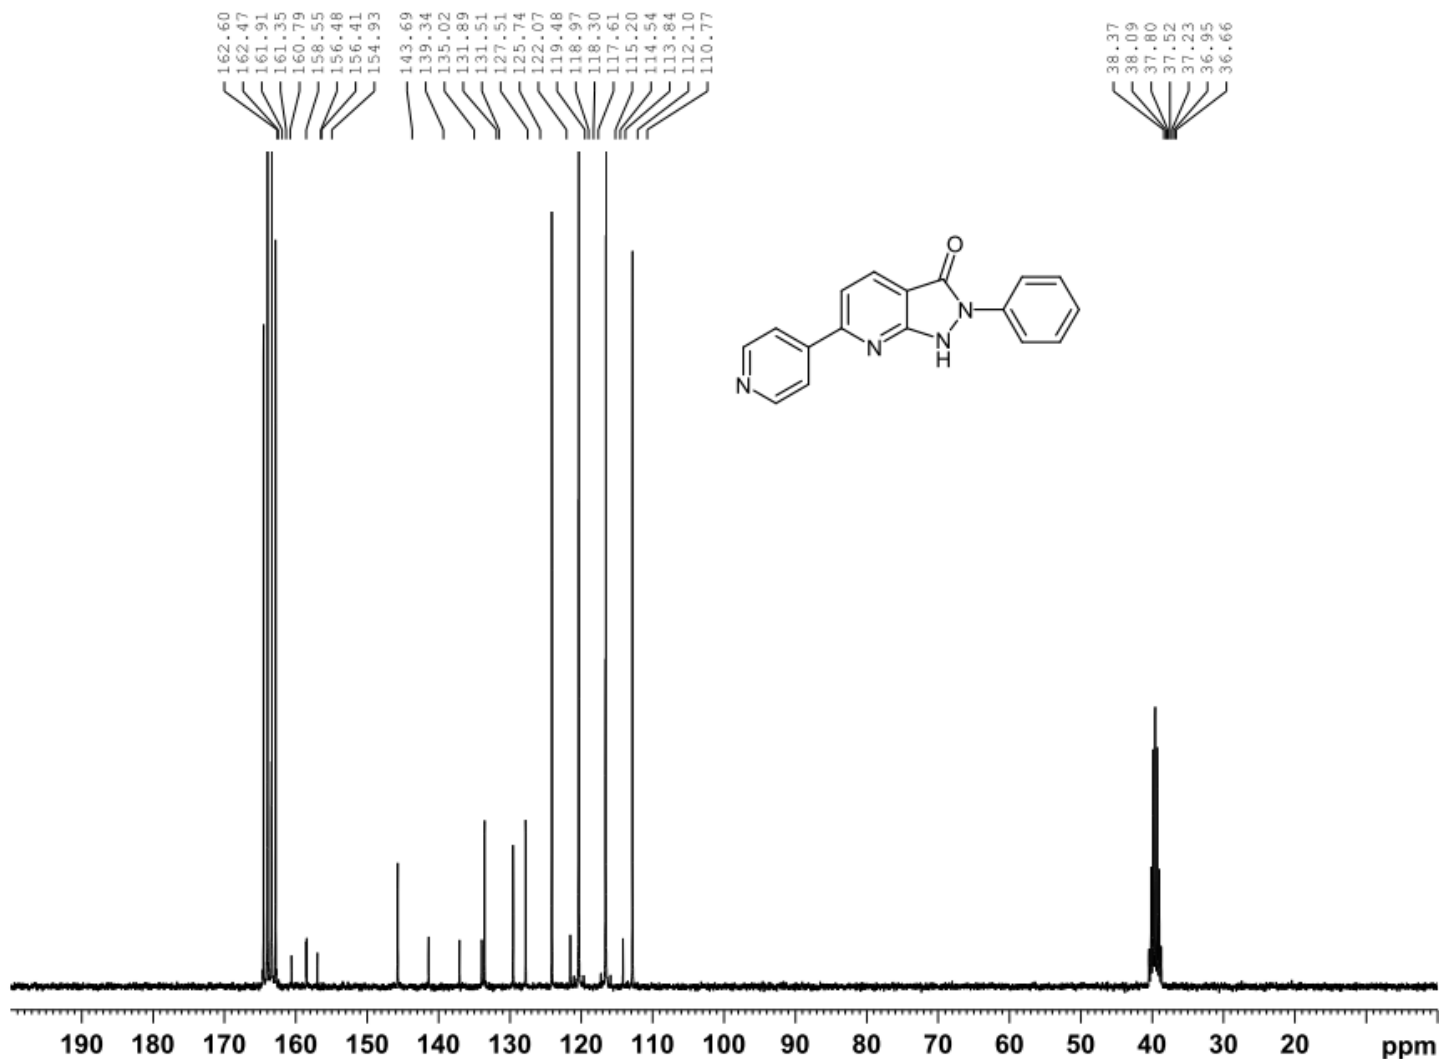

Current Data Parameters  
NAME 110713.u322 sm 522 C  
EXPNO 10  
PROCNO 1

F2 - Acquisition Parameters  
Date\_ 20110714  
Time 2.07  
INSTRUM spect  
PROBHD 5 mm PABBO BB-  
PULPROG zgpg30  
TD 65536  
SOLVENT D2O  
NS 1600  
DS 4  
SWH 18028.846 Hz  
FIDRES 0.275098 Hz  
AQ 1.8175818 sec  
RG 2050  
DW 27.733 usec  
DE 10.00 usec  
TE 298.4 K  
D1 2.0000000 sec  
D11 0.0300000 sec  
TD0 1

CHANNEL f1  
NUC1 13C  
P1 10.00 usec  
PL1 -0.50 dB  
PL1W 33.25691986 W  
SFO1 75.4752953 MHz

CHANNEL f2  
CPDPRG2 waltz16  
NUC2 1H  
PCPD2 72.00 usec  
PL2 0.00 dB  
PL12 17.00 dB  
PL13 17.00 dB  
PL2W 11.25325108 W  
PL12W 0.22453187 W  
PL13W 0.22453187 W  
SFO2 300.1312005 MHz

F2 - Processing parameters  
SI 32768  
SF 75.4675933 MHz  
WDW EM  
SSB 0  
LB 1.00 Hz  
GB 0  
PC 1.40

120

Gevorgyan AG204 1H DMSO

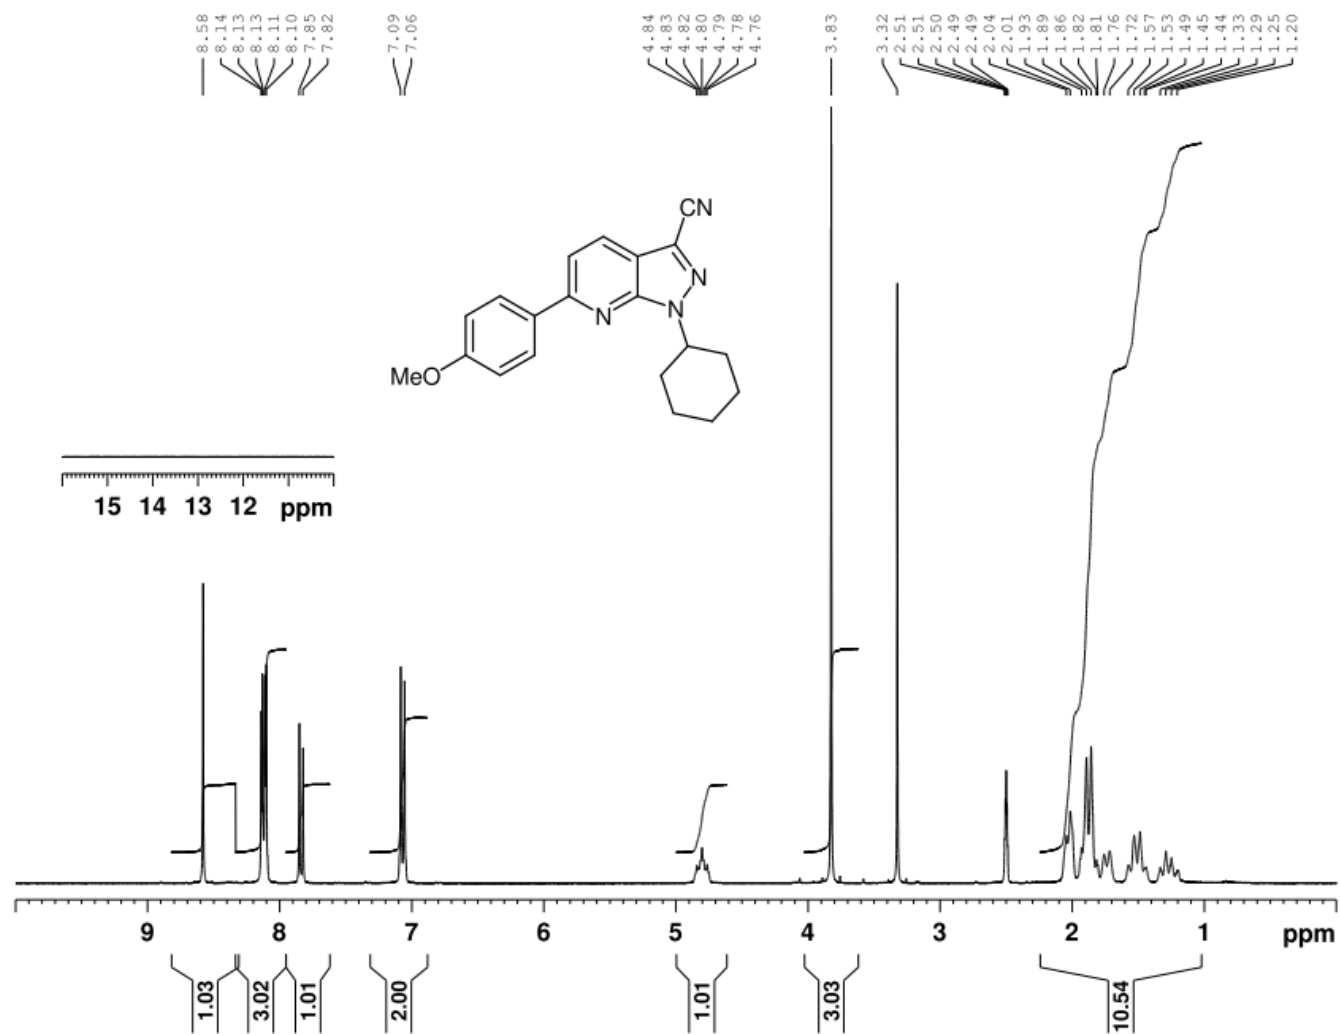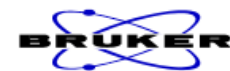

NAME 110316.u304 ag 204  
EXPNO 10  
PROCNO 1  
Date\_ 20110316  
Time 8.58  
INSTRUM spect  
PROBHD 5 mm PABBO BB-  
PULPROG zg30  
TD 65536  
SOLVENT DMSO  
NS 16  
DS 2  
SWH 6188.119 Hz  
FIDRES 0.094423 Hz  
AQ 5.2953587 sec  
RG 128  
DW 80.800 usec  
DE 10.00 usec  
TE 298.2 K  
D1 1.00000000 sec  
TD0 1

===== CHANNEL f1 =====  
NUC1 1H  
P1 10.00 usec  
PL1 0.00 dB  
PL1W 11.25325108 W  
SFO1 300.1318534 MHz  
SI 32768  
SF 300.1300052 MHz  
WDW EM  
SSB 0  
LB 0.30 Hz  
GB 0  
PC 1.00

Gevorgyan AG204 13C DMSO

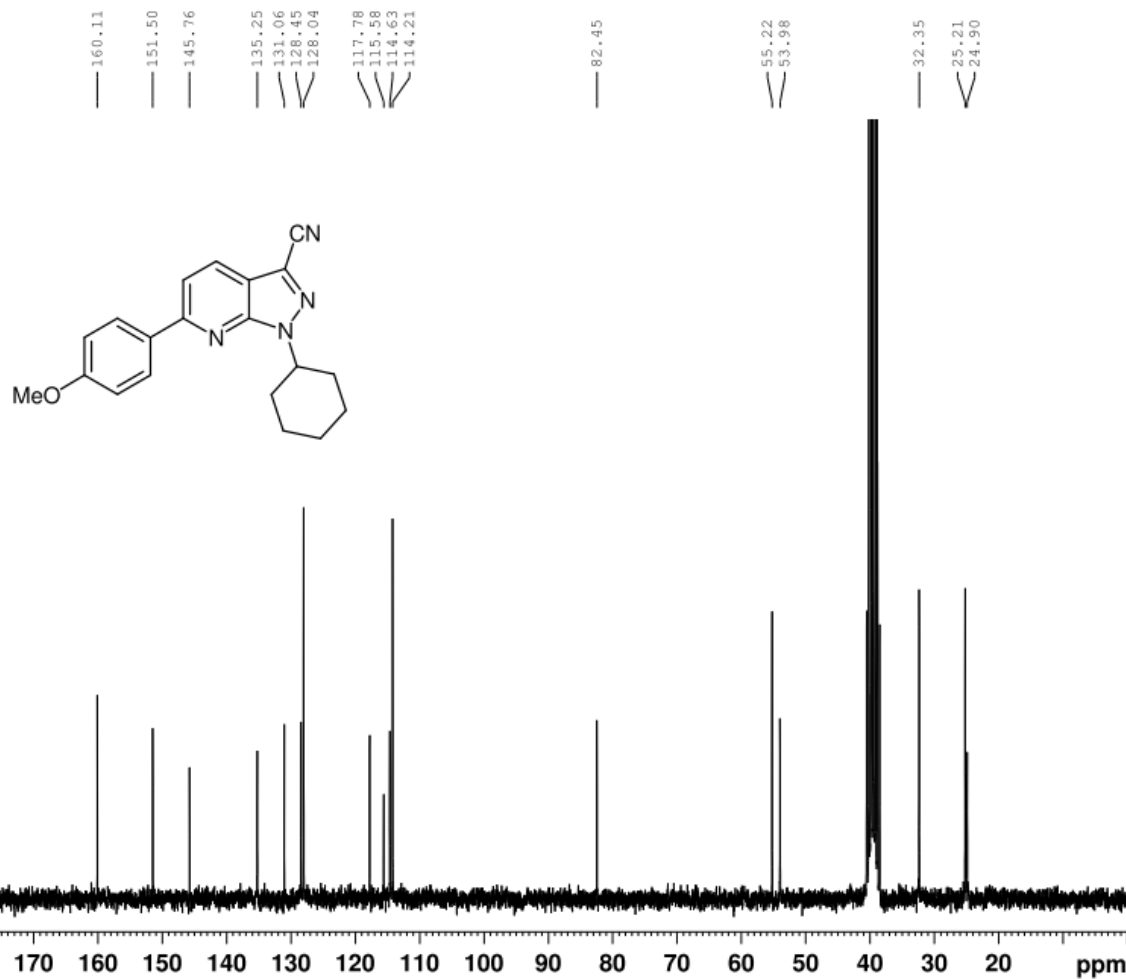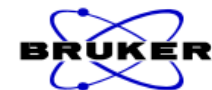

NAME 110317.210 ag 204 C  
EXPNO 10  
PROCNO 1  
Date\_ 20110318  
Time 2.19  
INSTRUM spect  
PROBHD 5 mm PABBO BB-  
PULPROG zgpg30  
TD 65536  
SOLVENT DMSO  
NS 1024  
DS 4  
SWH 15000.000 Hz  
FIDRES 0.228882 Hz  
AQ 2.1845834 sec  
RG 2050  
DW 33.333 usec  
DE 10.00 usec  
TE 297.9 K  
D1 2.0000000 sec  
d11 0.0300000 sec  
DELTA 1.89999998 sec  
TD0 1

===== CHANNEL f1 =====  
NUC1 13C  
P1 10.00 usec  
PL1 -1.00 dB  
SFO1 62.9015280 MHz

===== CHANNEL f2 =====  
CPDPRG2 waltz16  
NUC2 1H  
PCPD2 70.00 usec  
PL12 15.00 dB  
PL13 15.00 dB  
PL2 -2.50 dB  
SFO2 250.1310005 MHz  
SI 32768  
SF 62.8952692 MHz  
WDW EM  
SSB 0  
LB 1.00 Hz  
GB 0  
PC 1.40

Gevorgyan AG137 1H DMSO

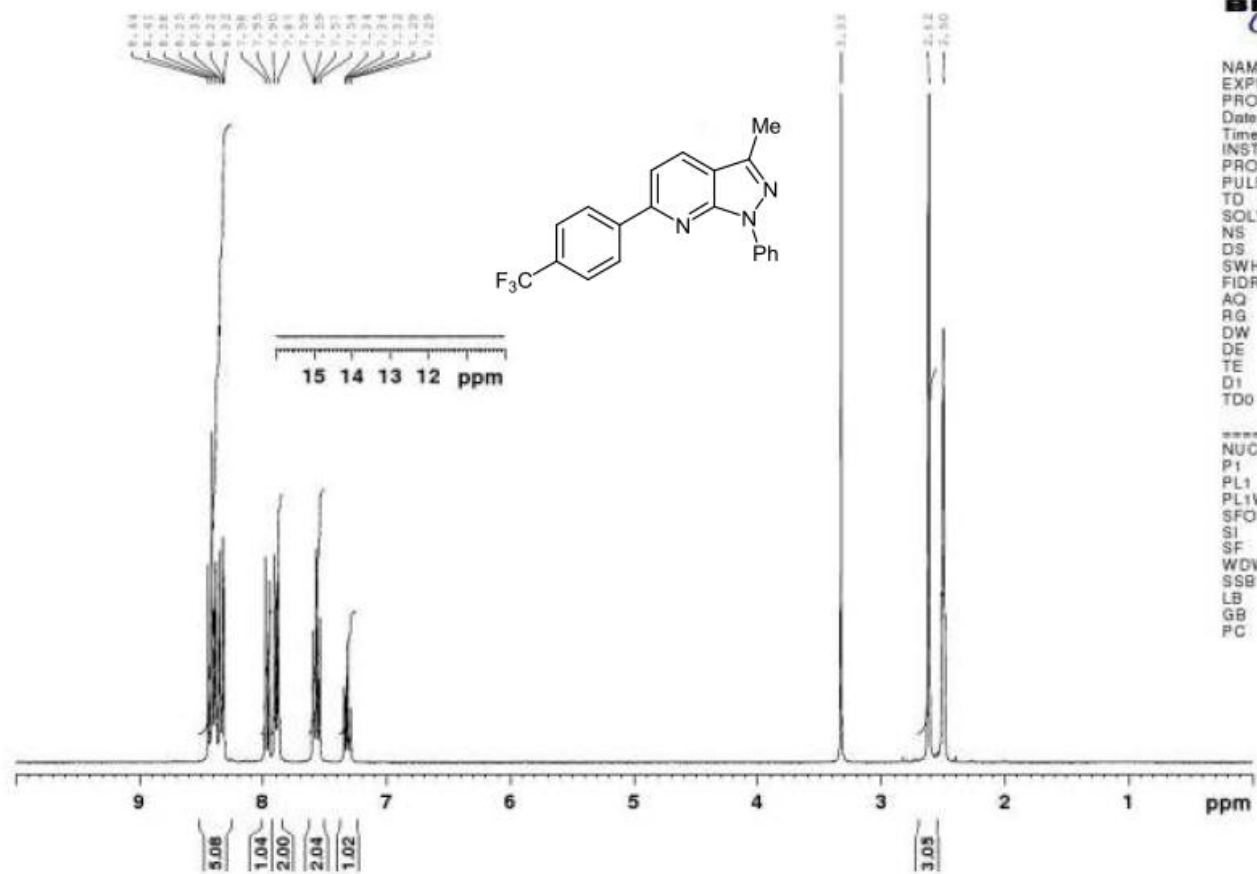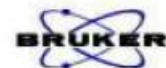

NAME 110120.u306.ag137  
EXPNO 10  
PROCNO 1  
Date\_ 20110120  
Time 8.48  
INSTRUM spect  
PROBHD 5 mm PABBO BB-  
PULPROG zg30  
TD 65536  
SOLVENT DMSO  
NS 16  
DS 2  
SWH 6188.119 Hz  
FIDRES 0.094423 Hz  
AQ 5.2953587 sec  
RG 161  
DW 80.800 usec  
DE 10.00 usec  
TE 298.2 K  
D1 1.0000000 sec  
TD0 1

===== CHANNEL f1 =====  
NUC1 1H  
P1 10.00 usec  
PL1 0.00 dB  
PL1W 11.25325108 W  
SFO1 300.1316534 MHz  
SI 32768  
SF 300.1300053 MHz  
WDW EM  
SSB 0  
LB 0.30 Hz  
GB 0  
PC 1.00

Gevorgyan AG137 13C DMSO

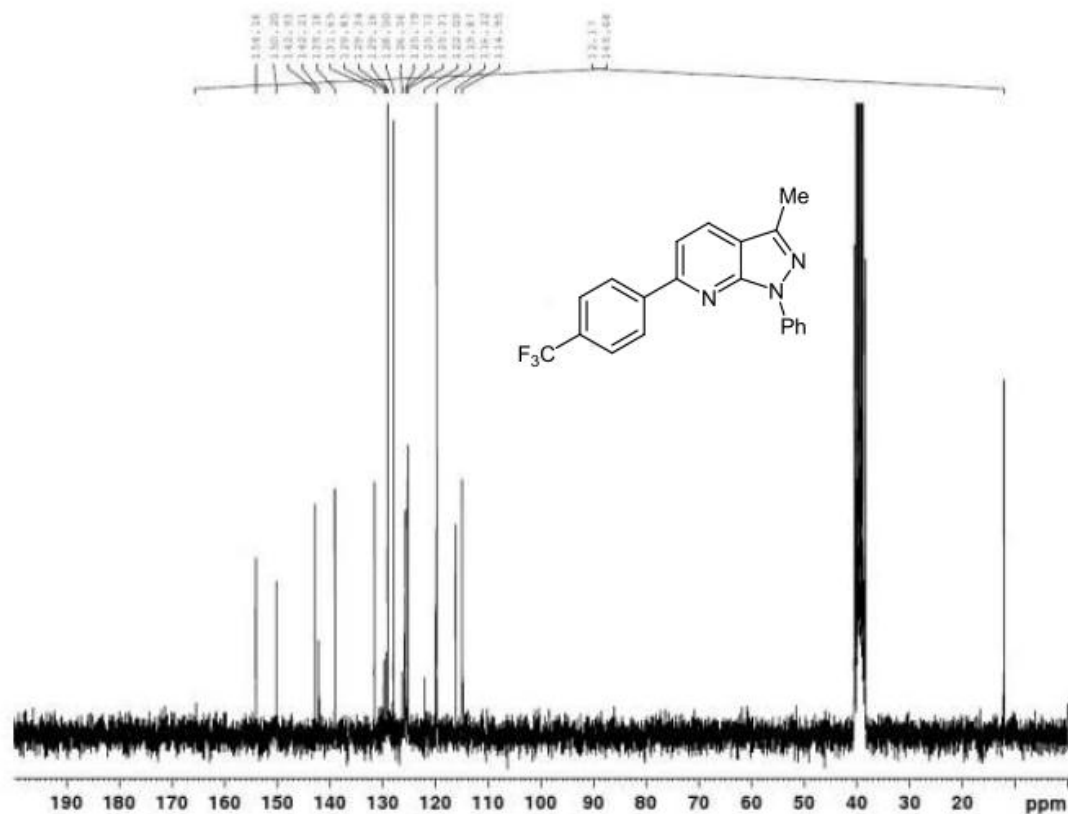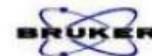

NAME 110121.222 ag 137 C  
EXPNO 1  
PROCNO 1  
Date\_ 20110123  
Time 0.43  
INSTRUM spect  
PROBHD 5 mm PABBO BB-  
PULPROG zgpg30  
TD 65536  
SOLVENT DMSO  
NS 1024  
DS 4  
SWH 15000.000 Hz  
FIDRES 0.228862 Hz  
AQ 2.1845834 sec  
RG 1620  
DW 33.333 usec  
DE 10.00 usec  
TE 297.9 K  
D1 2.00000000 sec  
d11 0.03000000 sec  
DELTA 1.89999998 sec  
TDO 1

===== CHANNEL f1 =====  
NUC1 13C  
P1 10.00 usec  
PL1 -1.00 dB  
SFO1 62.9015280 MHz

===== CHANNEL f2 =====  
CPDPRG2 waltz16  
NUC2 1H  
PCPD2 70.00 usec  
PL12 15.00 dB  
PL13 15.00 dB  
PL2 -2.50 dB  
SFO2 250.1310005 MHz  
SI 32768  
SF 62.8952892 MHz  
WDW EM  
SSB 0  
LB 1.00 Hz  
GB 0  
PC 1.40



Mkrtchyan, SM 509, DMSO, 1H

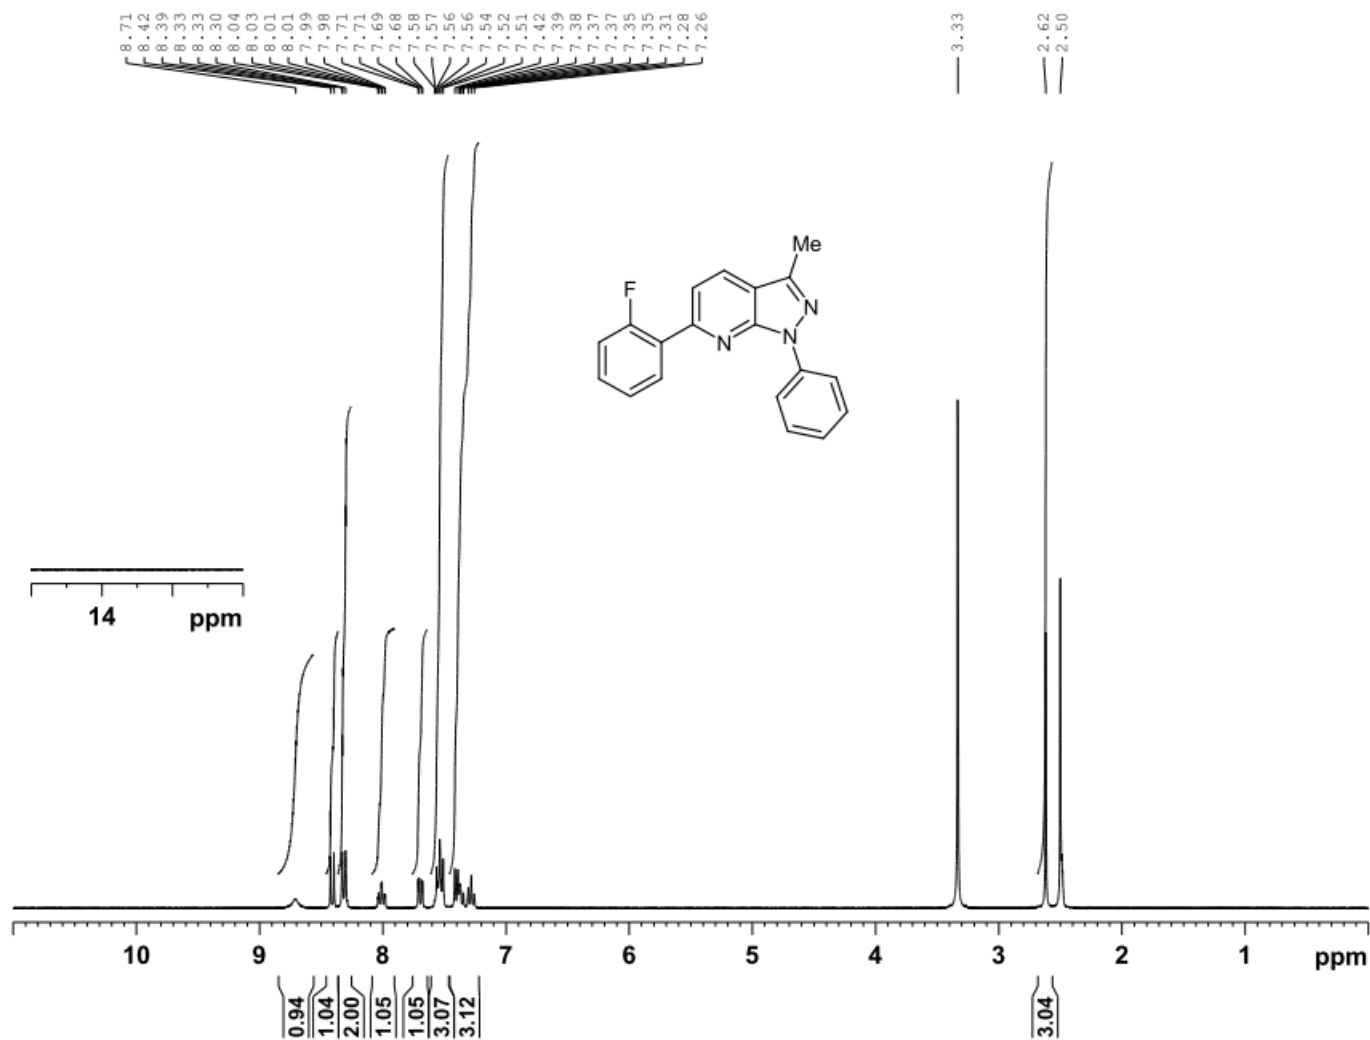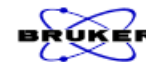

Current Data Parameters  
NAME 110701.u311 sm 509  
EXPNO 10  
PROCNO 1

F2 - Acquisition Parameters  
Date 20110701  
Time 9.28  
INSTRUM spect  
PROBHD 5 mm PABBO BB-  
PULPROG zg30  
TD 65536  
SOLVENT DMSO  
NS 16  
DS 2  
SWH 6188.119 Hz  
FIDRES 0.094423 Hz  
AQ 5.2953587 sec  
RG 128  
DW 80.800 usec  
DE 10.00 usec  
TE 298.2 K  
D1 1.0000000 sec  
TD0 1

CHANNEL f1  
NUC1 1H  
P1 10.00 usec  
PL1 0.00 dB  
PL1W 11.25325108 W  
SFO1 300.1318534 MHz

F2 - Processing parameters  
SI 32768  
SF 300.1300107 MHz  
WDW EM  
SSB 0  
LB 0.30 Hz  
GB 0  
PC 1.00

Mkrtchyan, SM 509, DMSO, 13C

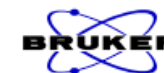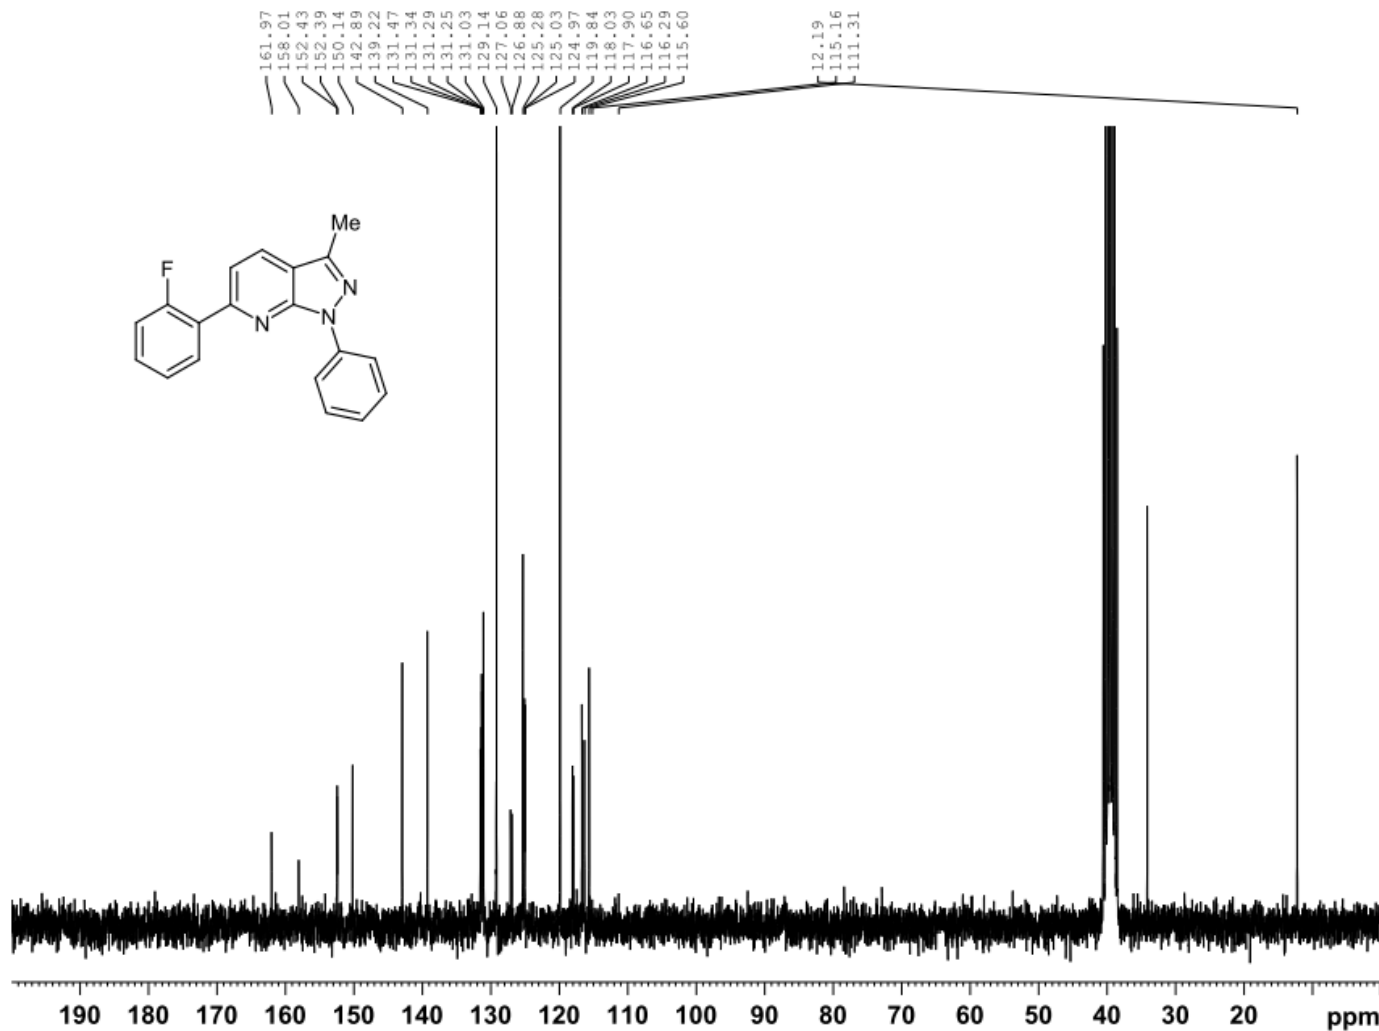

NAME 110704.204 sm 509 c  
EXPNO 10  
PROCNO 1  
Date\_ 20110704  
Time 16.01  
INSTRUM spect  
PROBHD 5 mm PABBO BB-  
PULPROG zgpg30  
TD 65536  
SOLVENT DMSO  
NS 1024  
DS 4  
SWH 15000.000 Hz  
FIDRES 0.228882 Hz  
AQ 2.1845834 sec  
RG 2050  
DW 33.333 usec  
DE 10.00 usec  
TE 298.6 K  
D1 2.00000000 sec  
d11 0.03000000 sec  
DELTA 1.89999998 sec  
TD0 1

===== CHANNEL f1 =====  
NUC1 13C  
P1 10.00 usec  
PL1 -1.00 dB  
SFO1 62.9015280 MHz

===== CHANNEL f2 =====  
CPDPRG2 waltz16  
NUC2 1H  
PCPD2 70.00 usec  
PL12 15.00 dB  
PL13 15.00 dB  
PL2 -2.50 dB  
SFO2 250.1310005 MHz  
SI 32768  
SF 62.8952692 MHz  
WDW EM  
SSB 0  
LB 1.00 Hz  
GB 0  
PC 1.40

Mkrtchyan, SM 524, DMSO, 1H

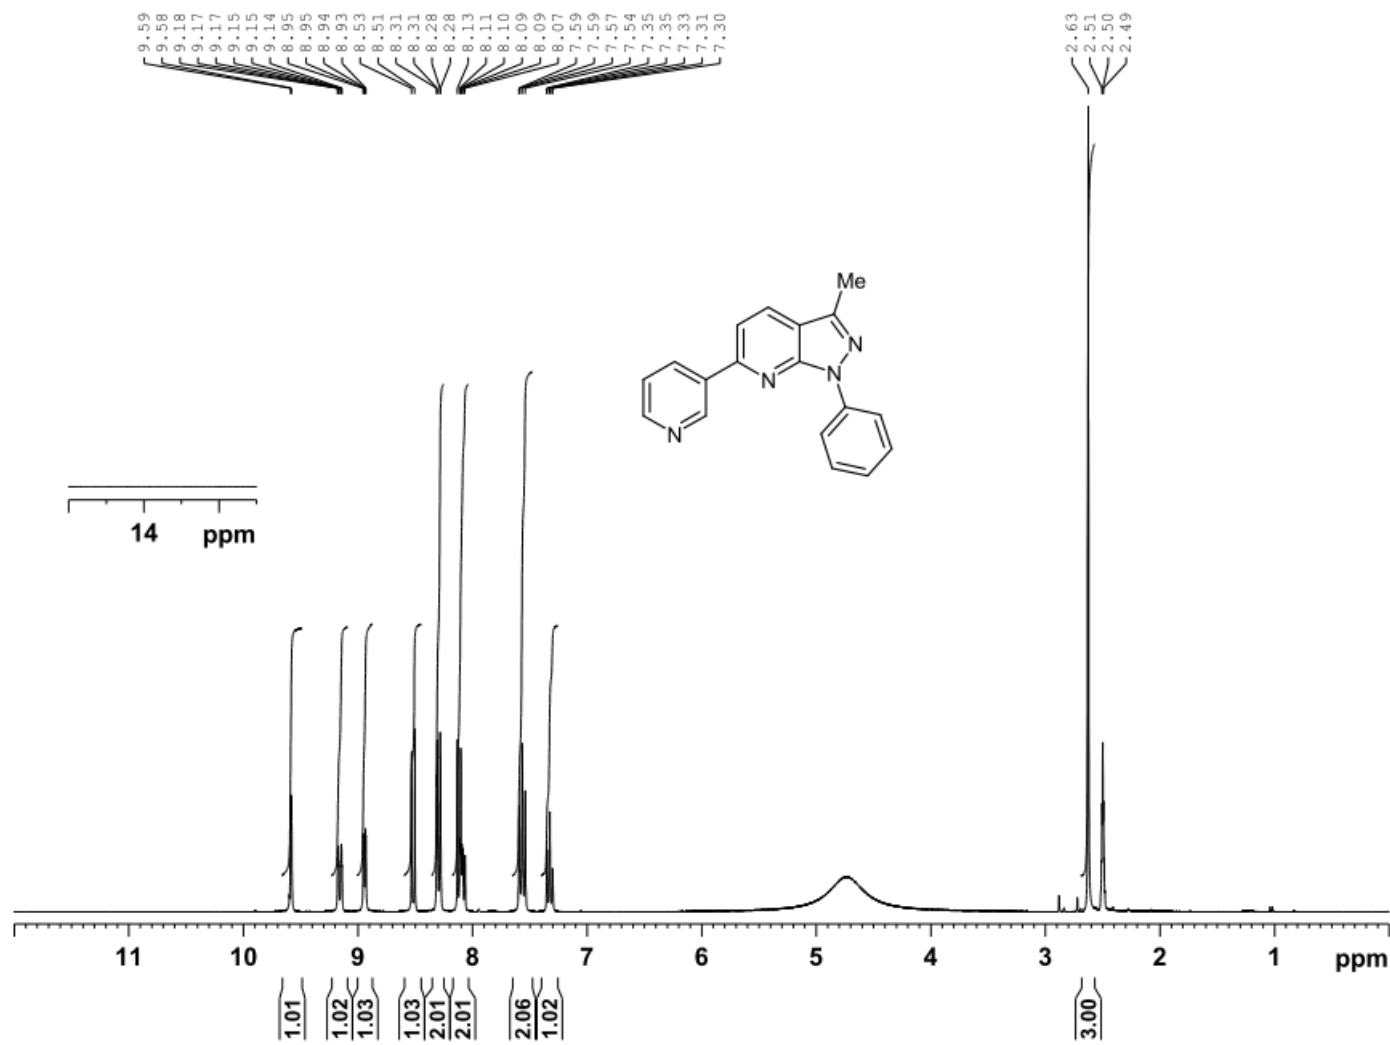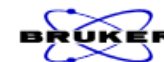

Current Data Parameters  
NAME 110707.u320 sm 524  
EXPNO 10  
PROCNO 1

F2 - Acquisition Parameters  
Date\_ 20110707  
Time 11.41  
INSTRUM spect  
PROBHD 5 mm PABBO BB-  
PULPROG zg30  
TD 65536  
SOLVENT DMSO  
NS 64  
DS 2  
SWH 6188.119 Hz  
FIDRES 0.094423 Hz  
AQ 5.2953587 sec  
RG 128  
DW 80.800 usec  
DE 10.00 usec  
TE 298.2 K  
D1 1.0000000 sec  
TD0 1

CHANNEL f1  
NUC1 1H  
P1 10.00 usec  
PL1 0.00 dB  
PL1W 11.25325108 W  
SFO1 300.1318534 MHz

F2 - Processing parameters  
SI 32768  
SF 300.1300073 MHz  
WDW EM  
SSB 0  
LB 0.30 Hz  
GB 0  
PC 1.00

Mkrtchyan, SM 524, DMSO, 13C

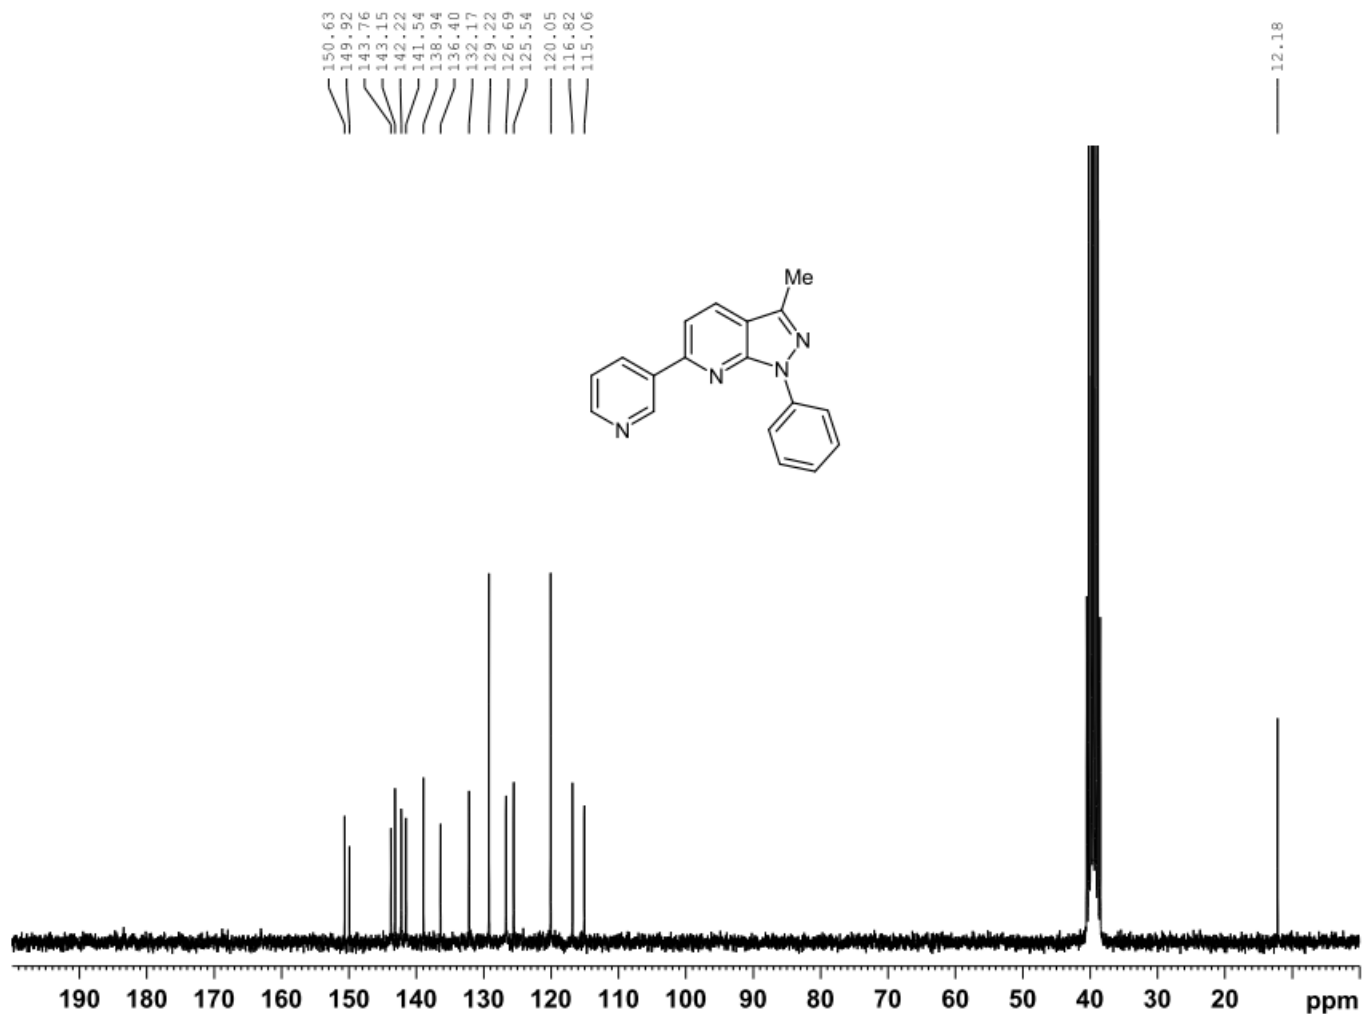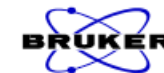

Current Data Parameters  
NAME 110708.207 sm 524 C  
EXPNO 10  
PROCNO 1

F2 - Acquisition Parameters  
Date\_ 20110710  
Time 4.52  
INSTRUM spect  
PROBHD 5 mm PABBO BB-  
PULPROG zgpg30  
TD 65536  
SOLVENT DMSO  
NS 2048  
DS 4  
SWH 15000.000 Hz  
FIDRES 0.228882 Hz  
AQ 2.1845834 sec  
RG 2050  
DW 33.333 usec  
DE 10.00 usec  
TE 299.7 K  
D1 2.0000000 sec  
d11 0.0300000 sec  
DELTA 1.89999998 sec  
TD0 1

CHANNEL f1  
NUC1 13C  
P1 10.00 usec  
PL1 -1.00 dB  
SFO1 62.9015280 MHz

CHANNEL f2  
CPDPRG2 waltz16  
NUC2 1H  
PCPD2 70.00 usec  
PL12 15.00 dB  
PL13 15.00 dB  
PL2 -2.50 dB  
SFO2 250.1310005 MHz

F2 - Processing parameters  
SI 32768  
SF 62.8952687 MHz  
WDW EM  
SSB 0  
LB 1.00 Hz  
GB 0  
PC 1.40

Mkrtchyan SM523 1H CF3COOD/DMSO

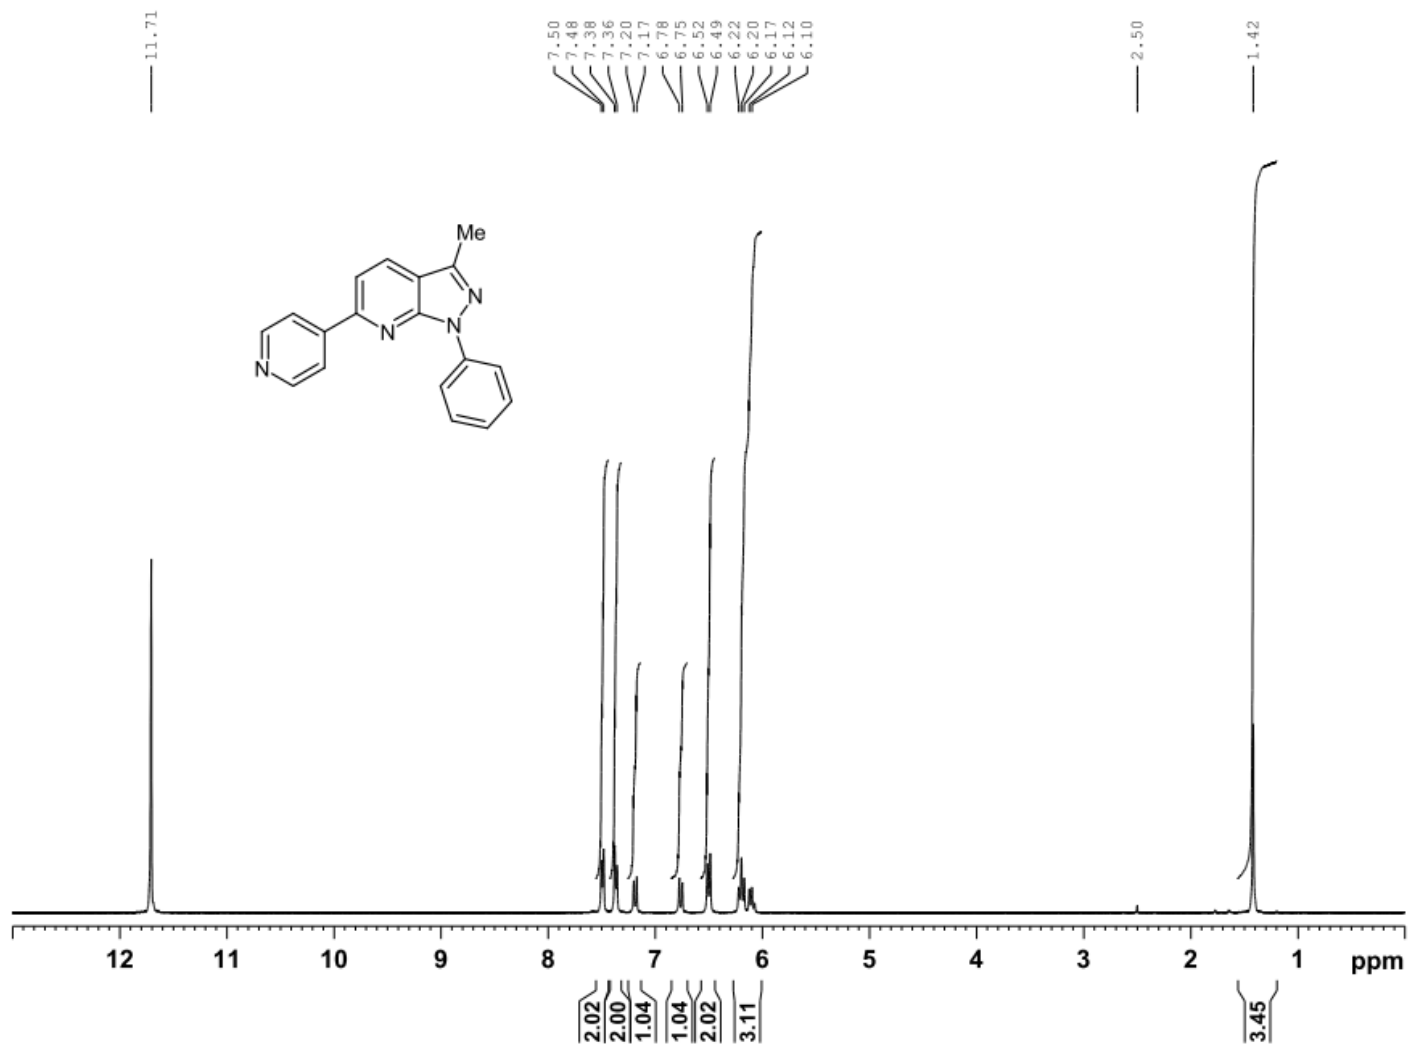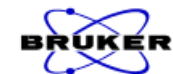

Current Data Parameters  
NAME 110714.u303 sm 525  
EXPNO 10  
PROCNO 1

F2 - Acquisition Parameters  
Date\_ 20110714  
Time 8.22  
INSTRUM spect  
PROBHD 5 mm PABBO BB-  
PULPROG zg30  
TD 65536  
SOLVENT D2O  
NS 16  
DS 2  
SWH 6188.119 Hz  
FIDRES 0.094423 Hz  
AQ 5.2953587 sec  
RG 128  
DW 80.800 usec  
DE 10.00 usec  
TE 298.2 K  
D1 1.0000000 sec  
TD0 1

CHANNEL f1  
NUC1 1H  
P1 10.00 usec  
PL1 0.00 dB  
PL1W 11.25325108 W  
SFO1 300.1318534 MHz

F2 - Processing parameters  
SI 32768  
SF 300.1310072 MHz  
WDW EM  
SSB 0  
LB 0.30 Hz  
GB 0  
PC 1.00

Mkrtchyan SM525 13C CF3COOD/DMSO

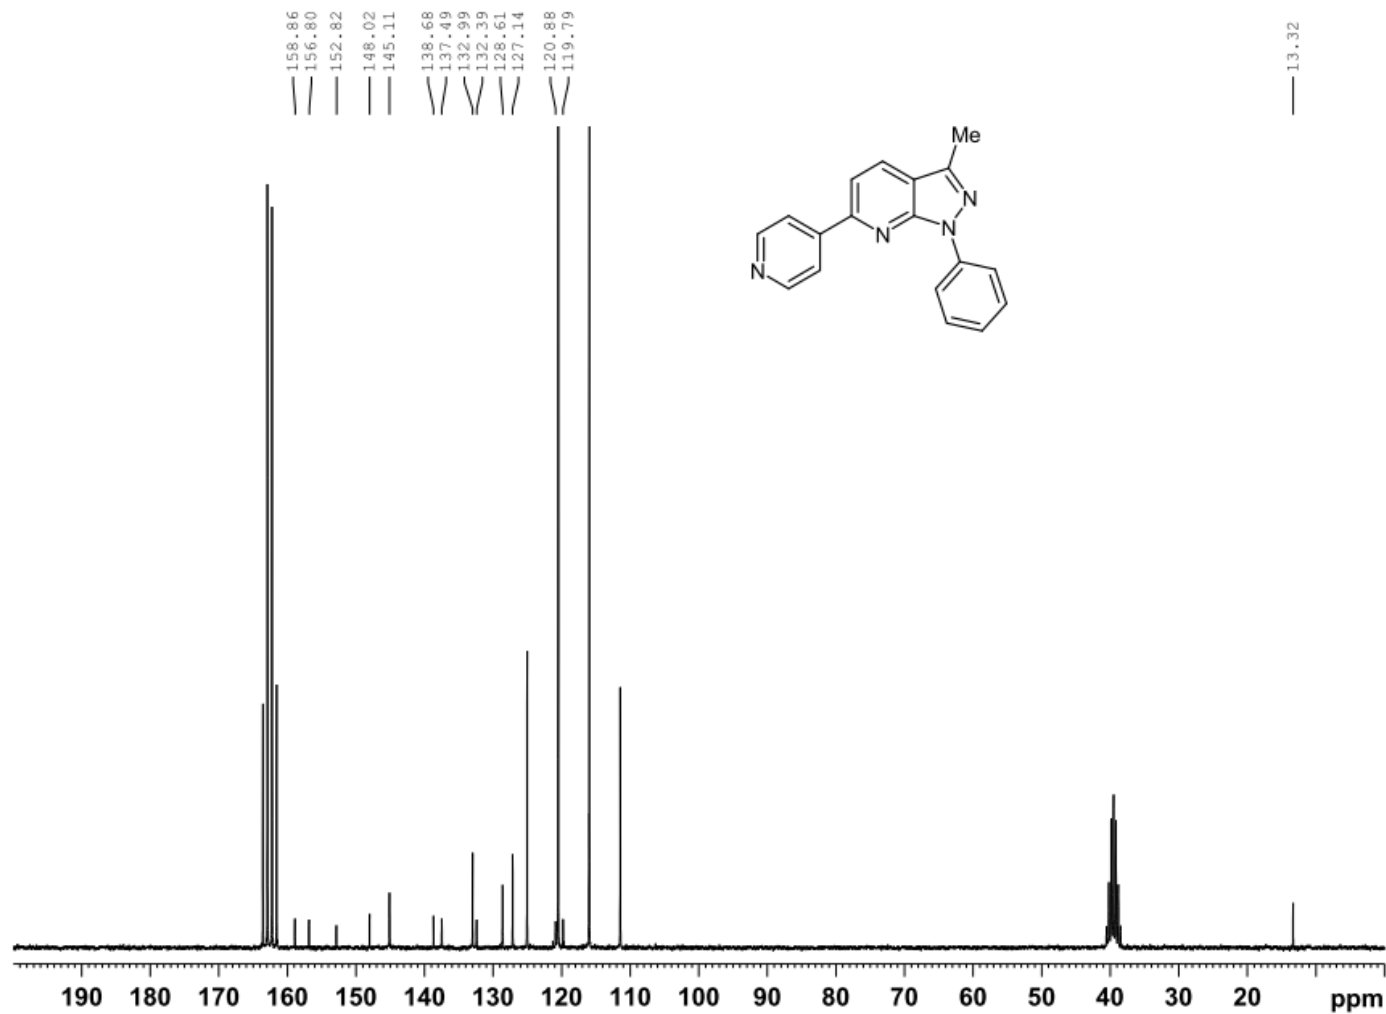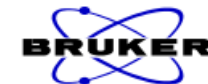

NAME 110715.212 sm 525 C  
EXPNO 10  
PROCNO 1  
Date\_ 20110717  
Time 2.33  
INSTRUM spect  
PROBHD 5 mm PABBO BB-  
PULPROG zgpg30  
TD 65536  
SOLVENT D2O  
NS 1024  
DS 4  
SWH 15000.000 Hz  
FIDRES 0.228882 Hz  
AQ 2.1845834 sec  
RG 2050  
DW 33.333 usec  
DE 10.00 usec  
TE 298.0 K  
D1 2.00000000 sec  
d11 0.03000000 sec  
DELTA 1.89999998 sec  
TD0 1

===== CHANNEL f1 =====  
NUC1 13C  
P1 10.00 usec  
PL1 -1.00 dB  
SFO1 62.9015280 MHz

===== CHANNEL f2 =====  
CPDPRG2 waltz16  
NUC2 1H  
PCPD2 70.00 usec  
PL12 15.00 dB  
PL13 15.00 dB  
PL2 -2.50 dB  
SFO2 250.1310005 MHz  
SI 32768  
SF 62.8951355 MHz  
WDW EM  
SSB 0  
LB 1.00 Hz  
GB 0  
PC 1.40

Gevorgyan AG174 1H DMSO

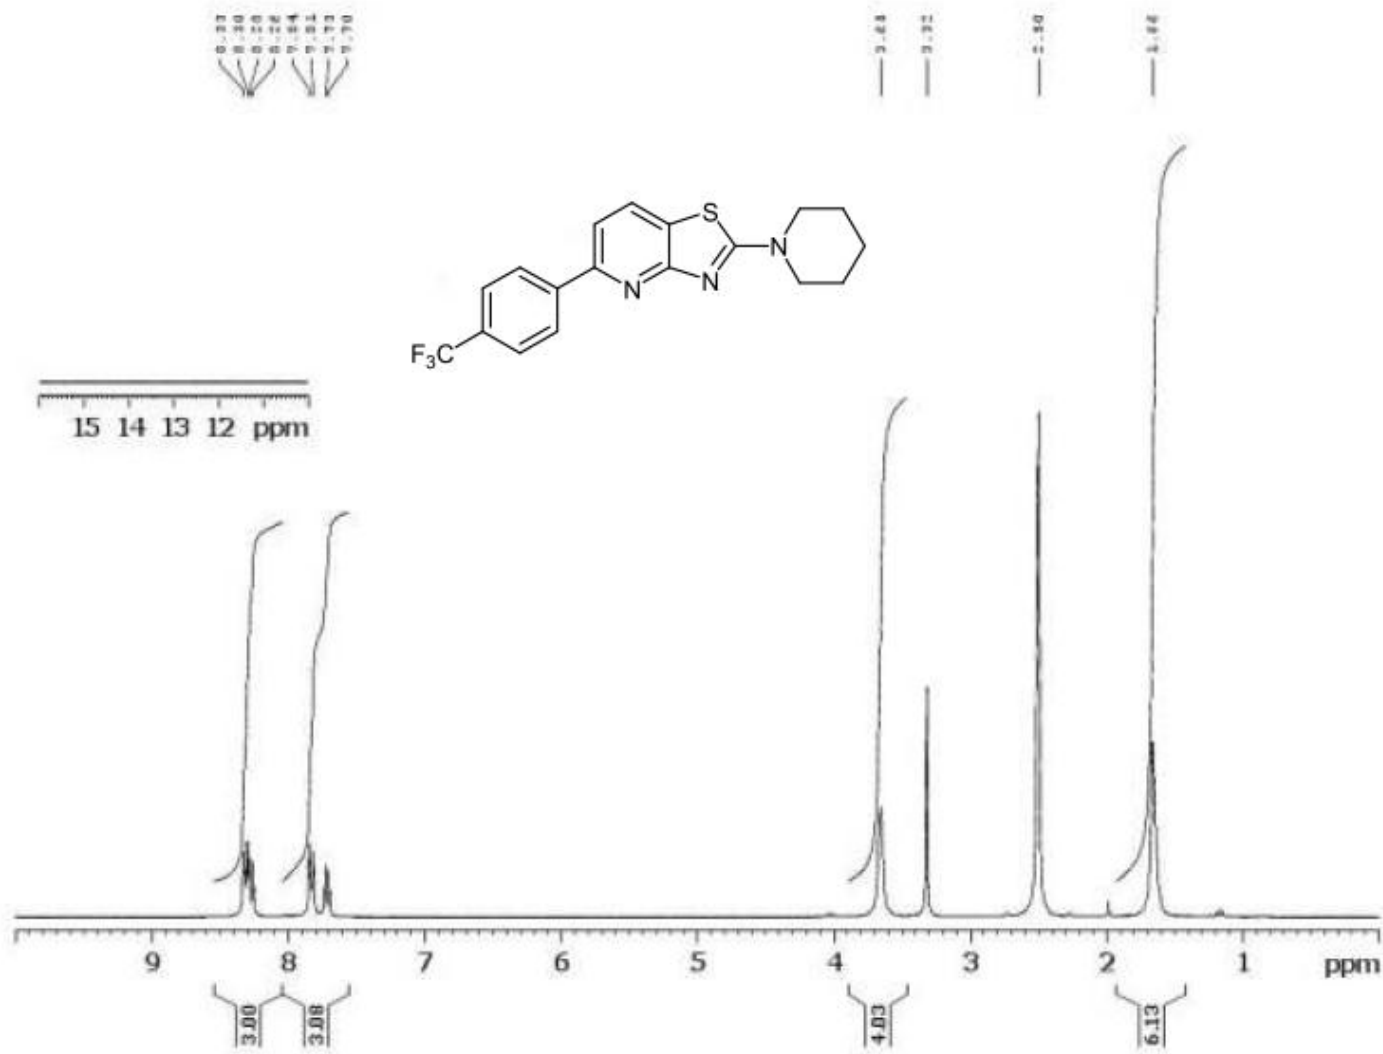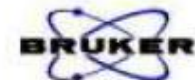

Current Data Parameters  
NAME 110211.u.308 ag 174  
EXPIRO 10  
PROCNO 1

F2 - Acquisition Parameters  
Date\_ 20110211  
Time 9.23  
INSTRUM spect  
PROBHD 5 mm PABBO BB-  
PULPROG zg30  
TD 65536  
SOLVENT DMSO  
NS 16  
DS 2  
SWH 6188.119 Hz  
FIDRES 0.094423 Hz  
AQ 5.295387 sec  
RG 144  
DH 80.800 usec  
DE 10.00 usec  
TE 298.2 K  
D1 1.0000000 sec  
TDO 1

===== CHANNEL f1 =====  
NUC1 1H  
P1 10.00 usec  
PL1 0.00 dB  
PL1W 11.25325108 W  
SFO1 300.1318534 MHz

F2 - Processing parameters  
SI 32768  
SF 300.130075 MHz  
WDW EM  
SSB 0  
LB 0.30 Hz  
GB 0  
PC 1.00

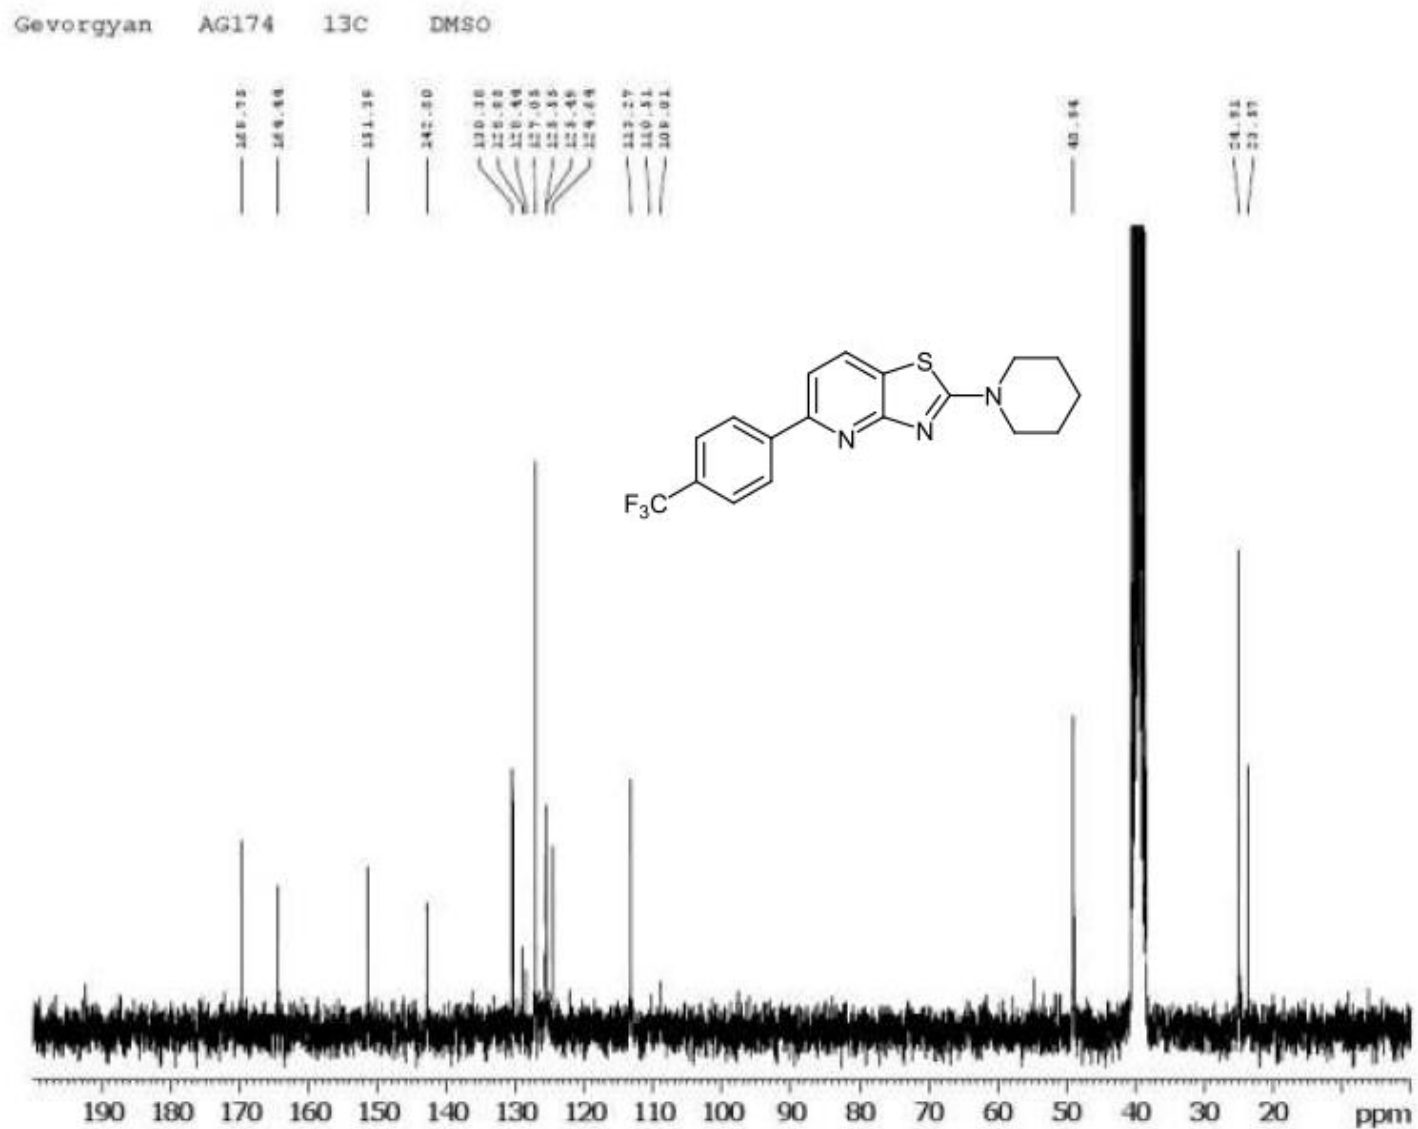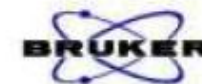

Current Data Parameters  
NAME 110214.212 ag 174 C  
EXPHO 10  
PROCNO 1

F2 - Acquisition Parameters  
Date\_ 20110215  
Time 6:56  
INSTRUM spect  
PROBHD 5mm PABBO BB-  
PULPROG zgpg30  
TD 65536  
SOLVENT DMSO  
NS 2048  
DS 4  
SWH 15000.000 Hz  
FIDRES 0.228802 Hz  
AQ 2.1045034 sec  
RG 2090  
DW 33.333 usec  
DE 10.00 usec  
TE 298.0 K  
D1 2.00000000 sec  
d11 0.03000000 sec  
DELTA 1.89999998 sec  
TD0 1

===== CHANNEL f1 =====  
NUC1 13C  
P1 10.00 usec  
PL1 -1.00 dB  
SFO1 62.90150280 MHz

===== CHANNEL f2 =====  
CPDPRG2 waltz16  
NUC2 1H  
PCPD2 70.00 usec  
PL12 15.00 dB  
PL13 15.00 dB  
PL2 -2.50 dB  
SFO2 250.1310005 MHz

F2 - Processing parameters  
SI 32768  
SF 62.8902694 MHz  
WDW EM  
SSB 0  
LB 1.00 Hz  
GB 0  
PC 1.40



Gevorgyan AG188 1H DMSO

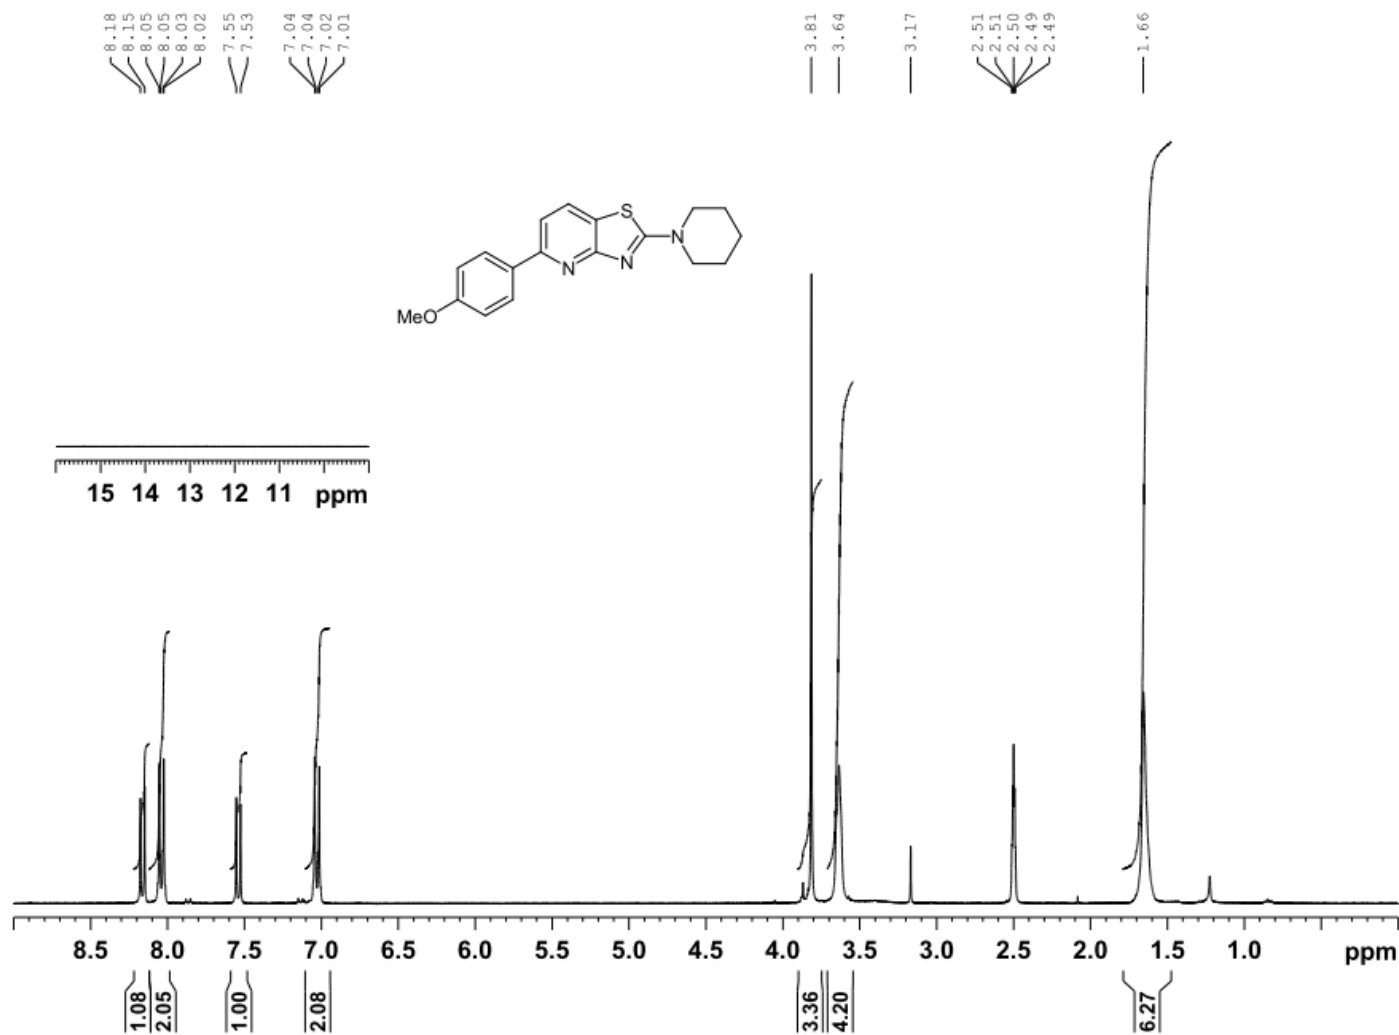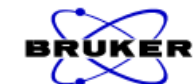

Current Data Parameters  
NAME 110303.u304 ag 188  
EXPNO 10  
PROCNO 1

F2 - Acquisition Parameters  
Date\_ 20110303  
Time 9.29  
INSTRUM spect  
PROBHD 5 mm PABBO BB-  
PULPROG zg30  
TD 65536  
SOLVENT DMSO  
NS 16  
DS 2  
SWH 6188.119 Hz  
FIDRES 0.094423 Hz  
AQ 5.2953587 sec  
RG 161  
DW 80.800 usec  
DE 10.00 usec  
TE 298.2 K  
D1 1.00000000 sec  
TD0 1

===== CHANNEL f1 =====  
NUC1 1H  
P1 10.00 usec  
PL1 0.00 dB  
PL1W 11.25325108 W  
SFO1 300.1318534 MHz

F2 - Processing parameters  
SI 32768  
SF 300.1300050 MHz  
WDW EM  
SSB 0  
LB 0.30 Hz  
GB 0  
PC 1.00

Gevorgyan AG188 13C DMSO

169.54  
164.13  
159.86  
153.02  
131.36  
130.13  
127.74  
122.33  
113.99  
111.99

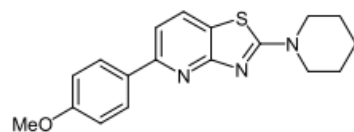

55.17  
48.89  
24.89  
23.59

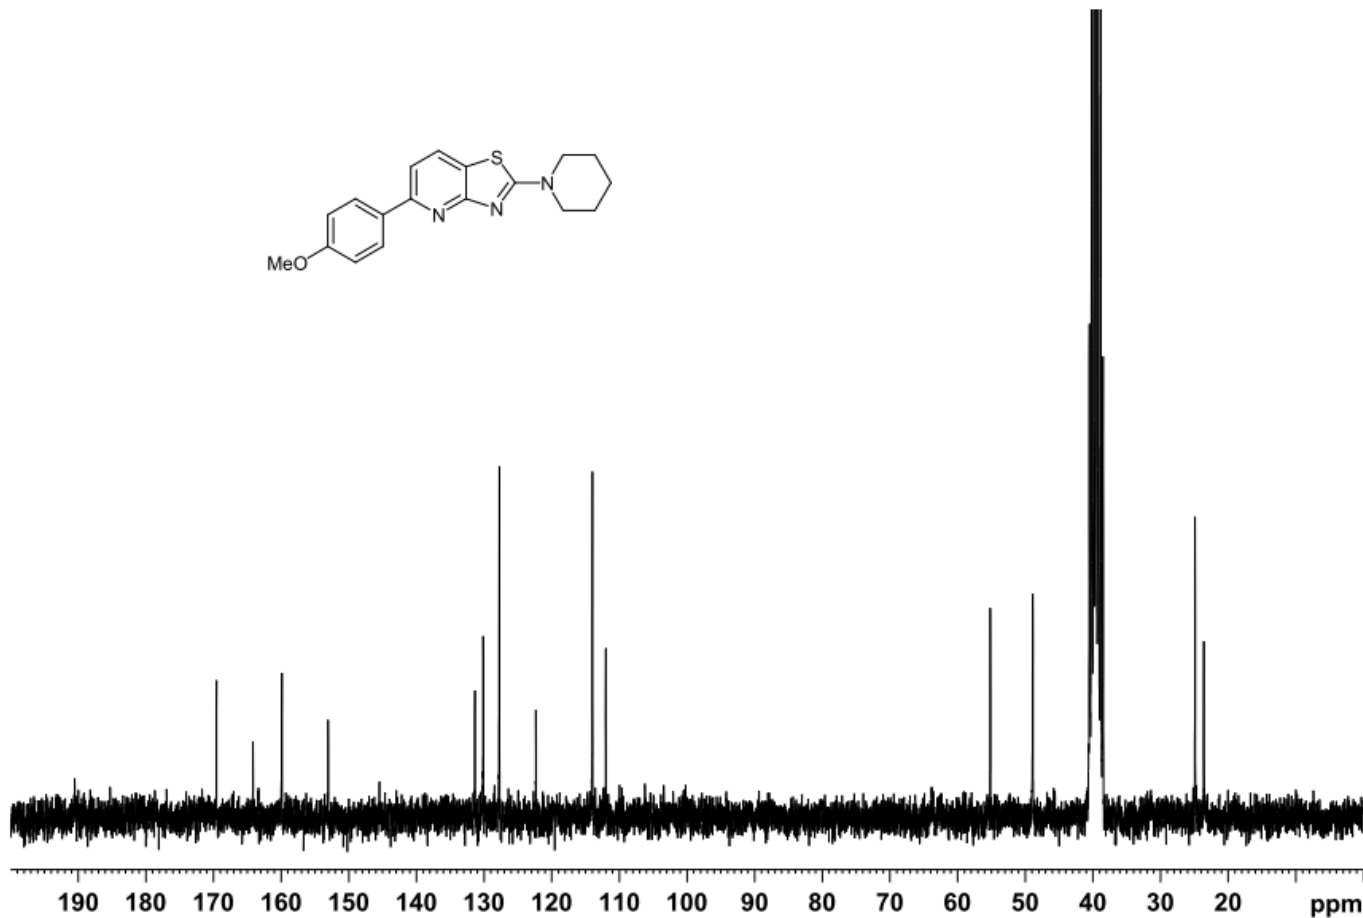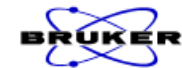

Current Data Parameters  
NAME 110304.236 ag 188  
EXPNO 10  
PROCNO 1

F2 - Acquisition Parameters  
Date\_ 20110307  
Time 12.03  
INSTRUM spect  
PROBHD 5 mm PABBO BB-  
PULPROG zgpg30  
TD 65536  
SOLVENT DMSO  
NS 1024  
DS 4  
SWH 15000.000 Hz  
FIDRES 0.228882 Hz  
AQ 2.1845834 sec  
RG 1440  
DW 33.333 usec  
DE 10.00 usec  
TE 297.9 K  
D1 2.0000000 sec  
d11 0.0300000 sec  
DELTA 1.89999998 sec  
TD0 1

===== CHANNEL f1 =====  
NUC1 13C  
P1 10.00 usec  
PL1 -1.00 dB  
SFO1 62.9015280 MHz

===== CHANNEL f2 =====  
CPDPRG2 waltz16  
NUC2 1H  
PCPD2 70.00 usec  
PL12 15.00 dB  
PL13 15.00 dB  
PL2 -2.50 dB  
SFO2 250.1310005 MHz

F2 - Processing parameters  
SI 32768  
SF 62.8952696 MHz  
WDW EM  
SSB 0  
LB 1.00 Hz  
GB 0  
PC 1.40

Gevorgyan AG 167 1H DMSO 80 grd/C

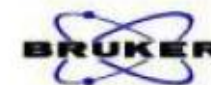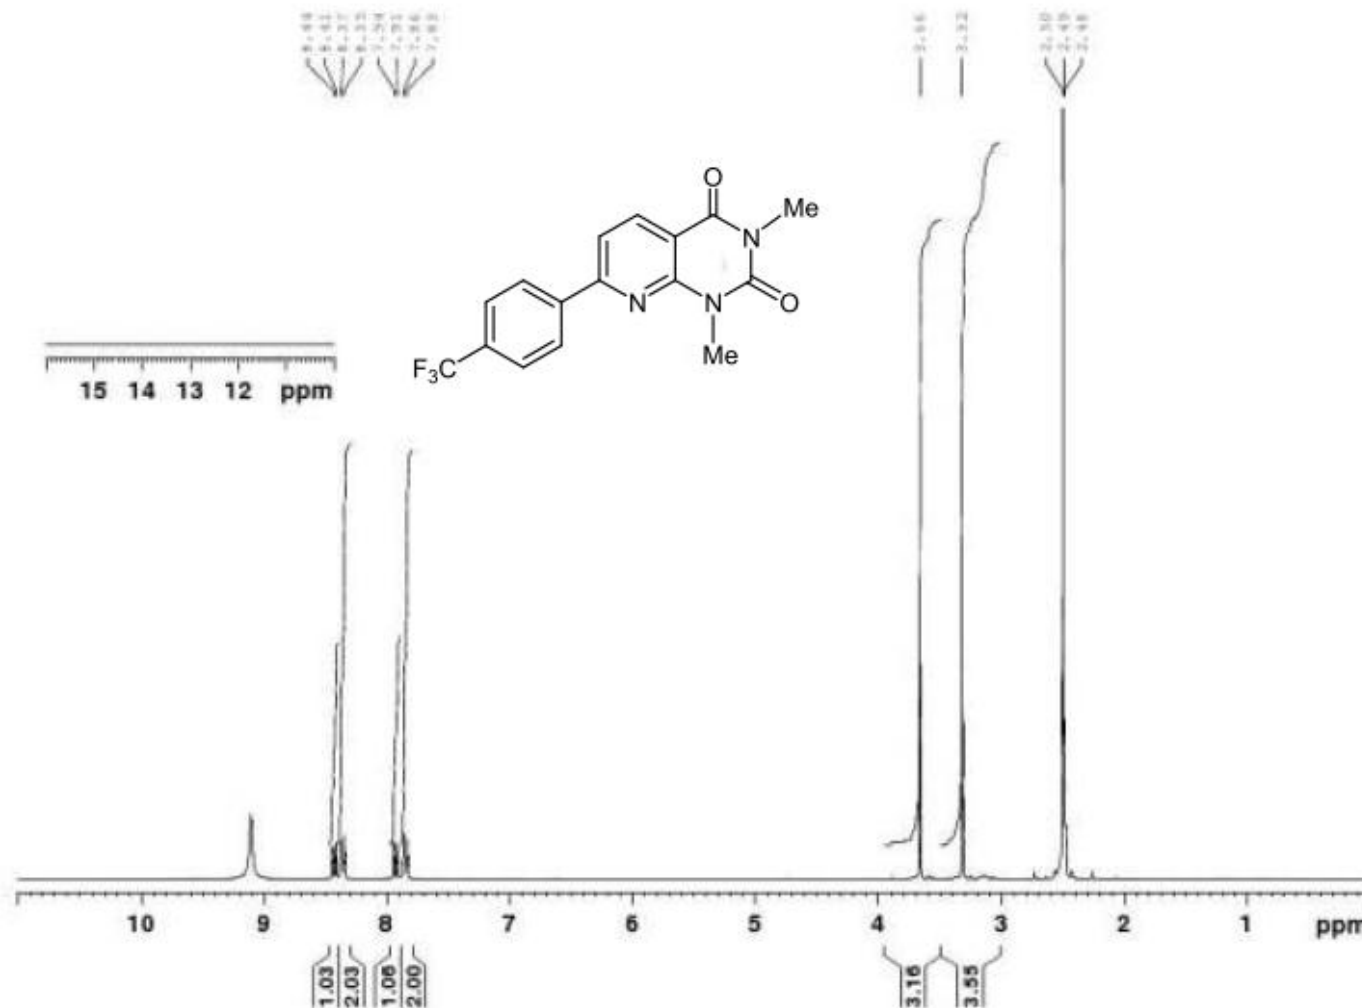

NAME 110201\_u318 ag 167  
EXPNO 10  
PROCNO 1  
Date\_ 20110201  
Time 14.47  
INSTRUM spect  
PROBHD 5 mm PABBO BB-  
PULPROG zg30  
TD 65536  
SOLVENT DMSO  
NS 32  
DS 2  
SWH 6188.119 Hz  
FIDRES 0.094423 Hz  
AQ 5.2953567 sec  
RG 114  
DW 80.800 usec  
DE 10.00 usec  
TE 353.2 K  
D1 1.00000000 sec  
TD0 1

----- CHANNEL f1 -----  
NUC1 1H  
P1 10.00 usec  
PL1 0.00 dB  
PL1W 11.25325108 W  
SFO1 300.1316534 MHz  
SI 32768  
SF 300.1300047 MHz  
WDW EM  
SSB 0  
LB 0.30 Hz  
GB 0  
PC 1.00

Gevorgyan AG167(1) 13C DMSO

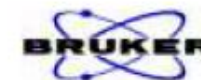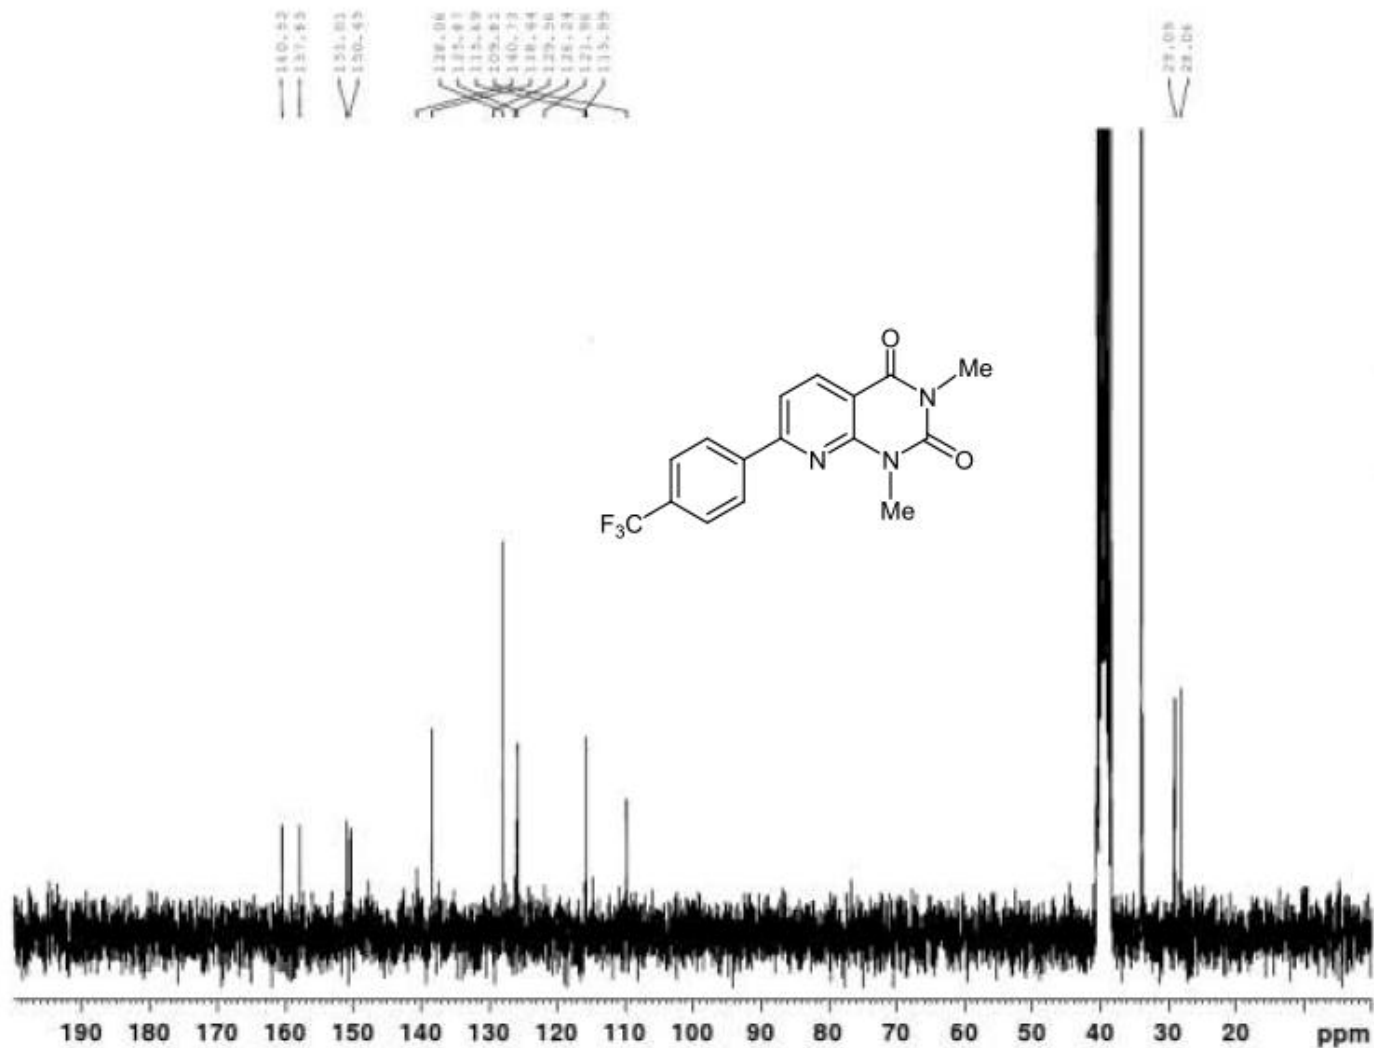

NAME 110211.226 ag 167 G  
EXPNO 10  
PROCNO 1  
Date\_ 20110213  
Time 6.22  
INSTRUM spect  
PROBHD 5 mm PABBO BB-  
PULPROG zgpg30  
TD 65536  
SOLVENT DMSO  
NS 1200  
DS 4  
SWH 15000.000 Hz  
FIDRES 0.228882 Hz  
AQ 2.1845834 sec  
RG 2050  
DW 33.333 usec  
DE 10.00 usec  
TE 297.9 K  
D1 2.00000000 sec  
d11 0.03000000 sec  
DELTA 1.89999998 sec  
TD0 1

----- CHANNEL f1 -----  
NUC1 13C  
P1 10.00 usec  
PL1 -1.00 dB  
SFO1 62.9015280 MHz

----- CHANNEL f2 -----  
CPDPRG2 waltz16  
NUC2 1H  
PCPD2 70.00 usec  
PL12 15.00 dB  
PL13 15.00 dB  
PL2 -2.50 dB  
SFO2 250.1310005 MHz  
SI 32768  
SF 62.8952687 MHz  
WDW EM  
SSB 0  
LB 1.00 Hz  
GB 0  
PC 1.40

Gevorgyan AG170 1H DMSO

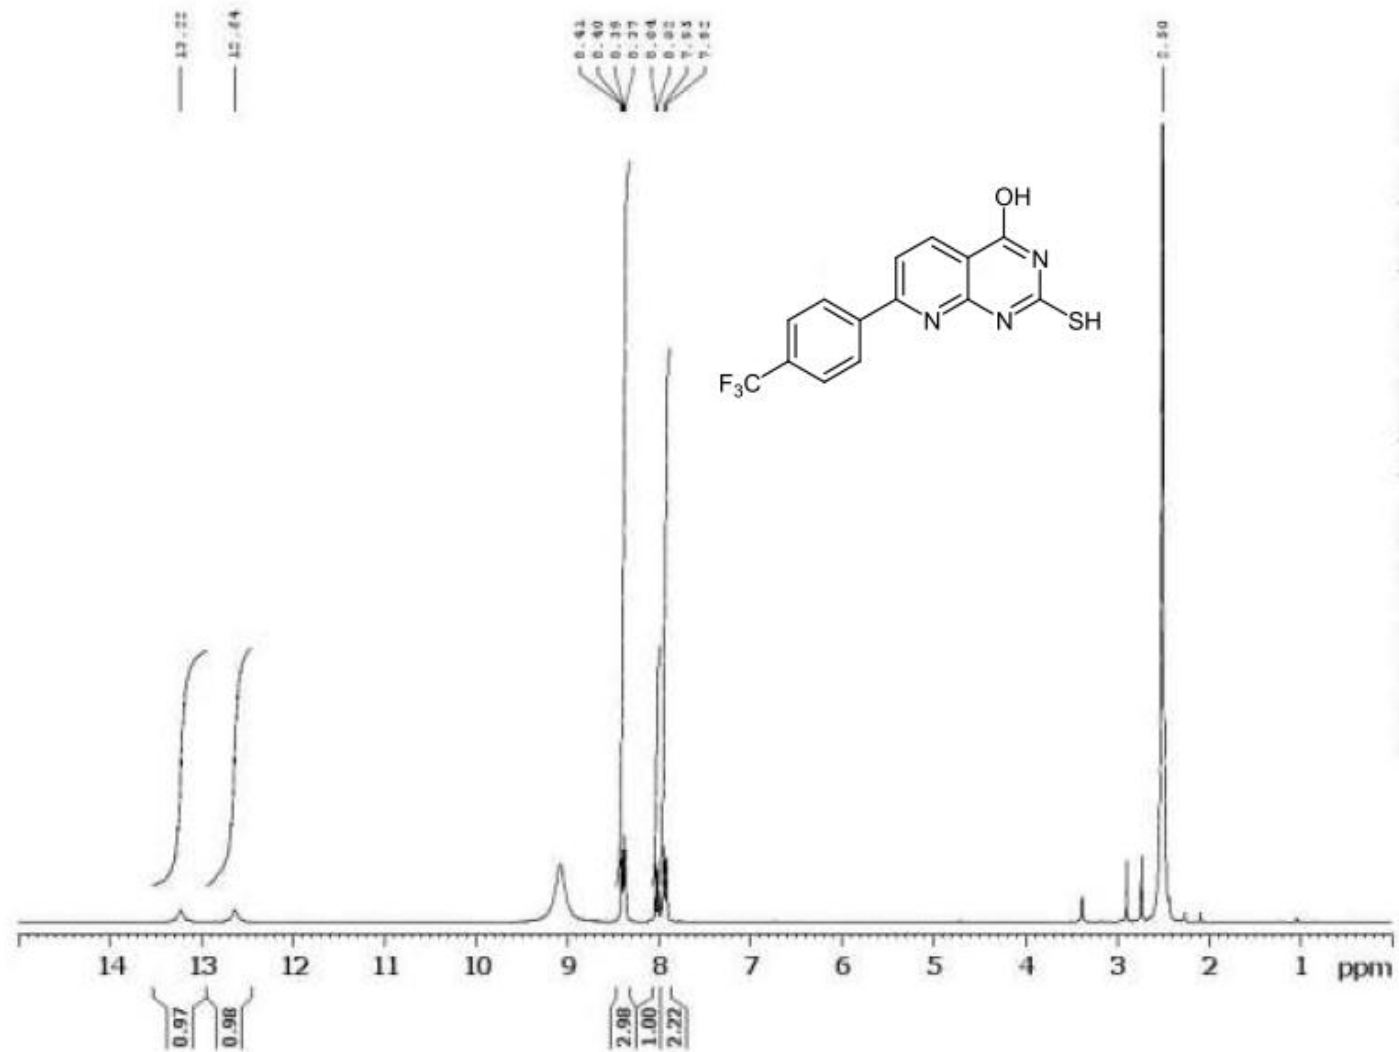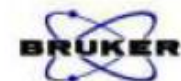

Current Data Parameters  
NAME 110131.u329 ag 170  
EXPHO 10  
PROCNO 1

F2 - Acquisition Parameters  
Date\_ 20110131  
Time 12.34  
INSTRUM spect  
PROBHD 5 mm PA180 MM  
PULPROG zg30  
TD 65536  
SOLVENT DMSO  
NS 16  
DS 2  
SWH 6181.119 Hz  
FIDRES 0.094423 Hz  
AQ 5.295397 sec  
RG 80.6  
DW 80.800 usec  
DE 10.00 usec  
TE 298.2 K  
D1 1.0000000 sec  
TDO 1

CHANNEL F1  
NUC1 1H  
P1 10.00 usec  
PL1 0.00 dB  
PL1W 11.25325108 W  
SFO1 300.1318534 MHz

F2 - Processing parameters  
SI 32768  
SF 300.1300015 MHz  
WDW EM  
SSB 0  
LB 0.30 Hz  
GB 0  
PC 1.00

Gevorgyan AG170 (1) 13C DMSO

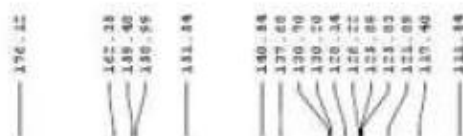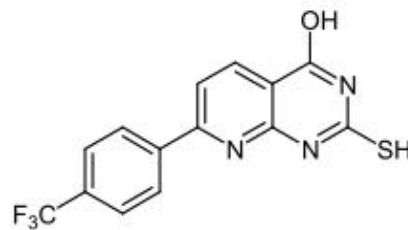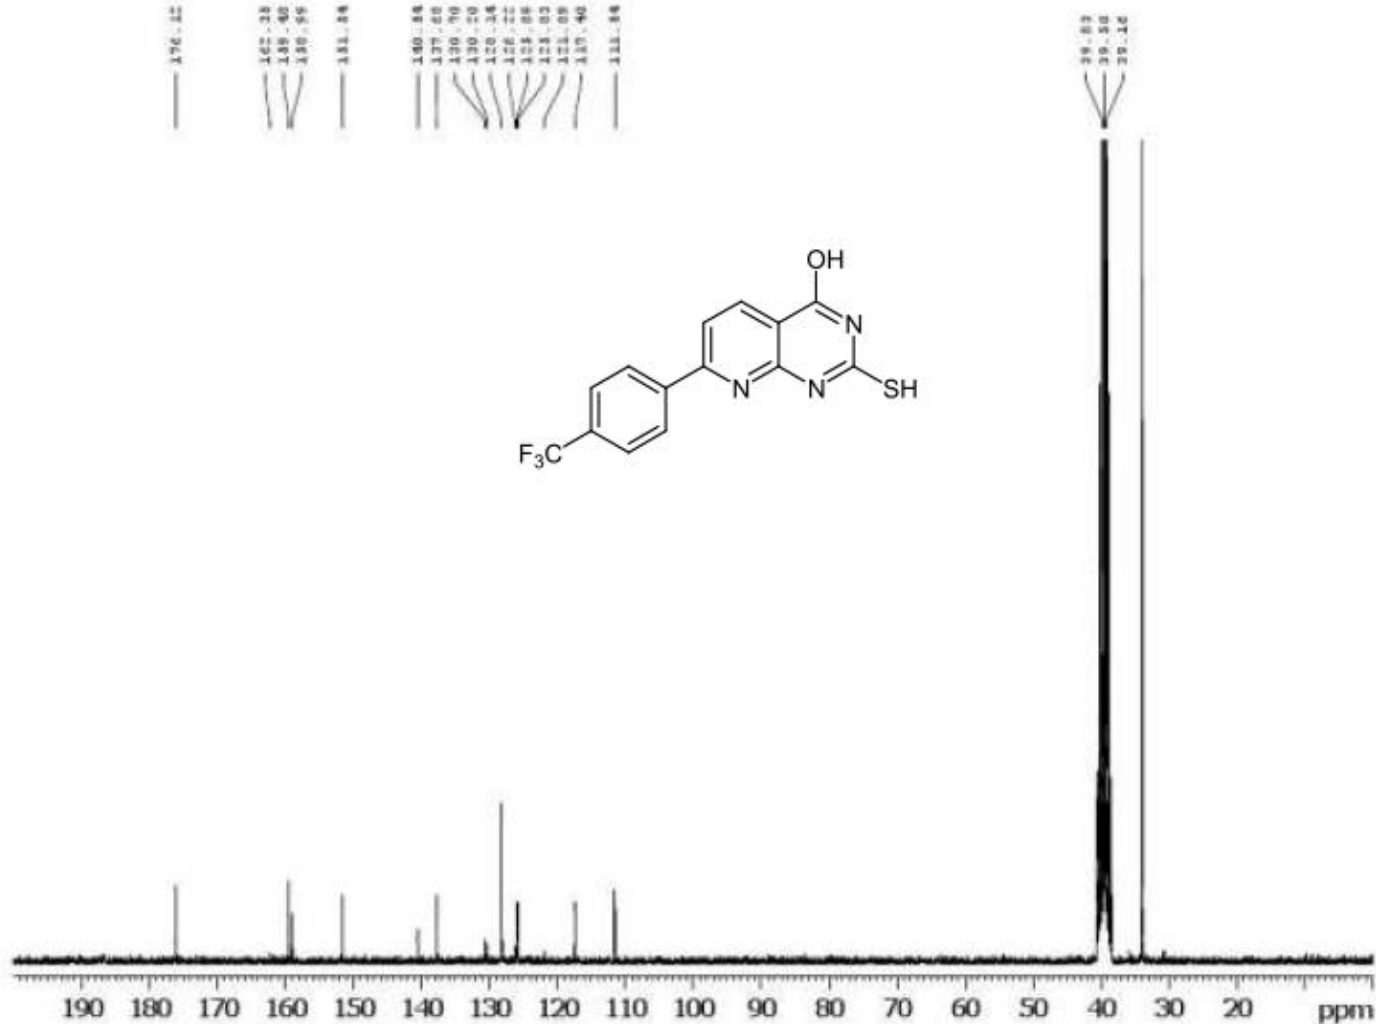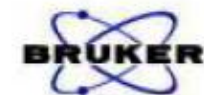

Current Data Parameters  
NAME 110211.227 ag 170 C  
EXPNO 10  
PROCNO 1

F2 - Acquisition Parameters  
Date\_ 20110213  
Time 8.51  
INSTRUM spect  
PROBHD 5 mm PABBO BB-  
PULPROG zgpg30  
TD 65536  
SOLVENT DMSO  
HS 1600  
DS 4  
SWH 15000.000 Hz  
FIDRES 0.228882 Hz  
AQ 2.1845834 sec  
RG 2050  
DW 33.333 usec  
DE 10.00 usec  
TE 298.0 K  
D1 2.0000000 sec  
d11 0.0300000 sec  
DELTA 1.89999996 sec  
TD0 1

===== CHANNEL f1 =====  
NUC1 13C  
P1 10.00 usec  
PL1 -1.00 dB  
SFO1 62.9015280 MHz

===== CHANNEL f2 =====  
CPDPRG2 waltz16  
NUC2 1H  
PCPD2 70.00 usec  
PL12 15.00 dB  
PL13 15.00 dB  
PL2 -2.50 dB  
SFO2 250.1310000 MHz

F2 - Processing parameters  
SI 32768  
SF 62.8952687 MHz  
WDW EM  
SSB 0  
LB 1.00 Hz  
GB 0  
PC 1.40

Gevorgyan AG182(1) 1H DMSO

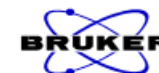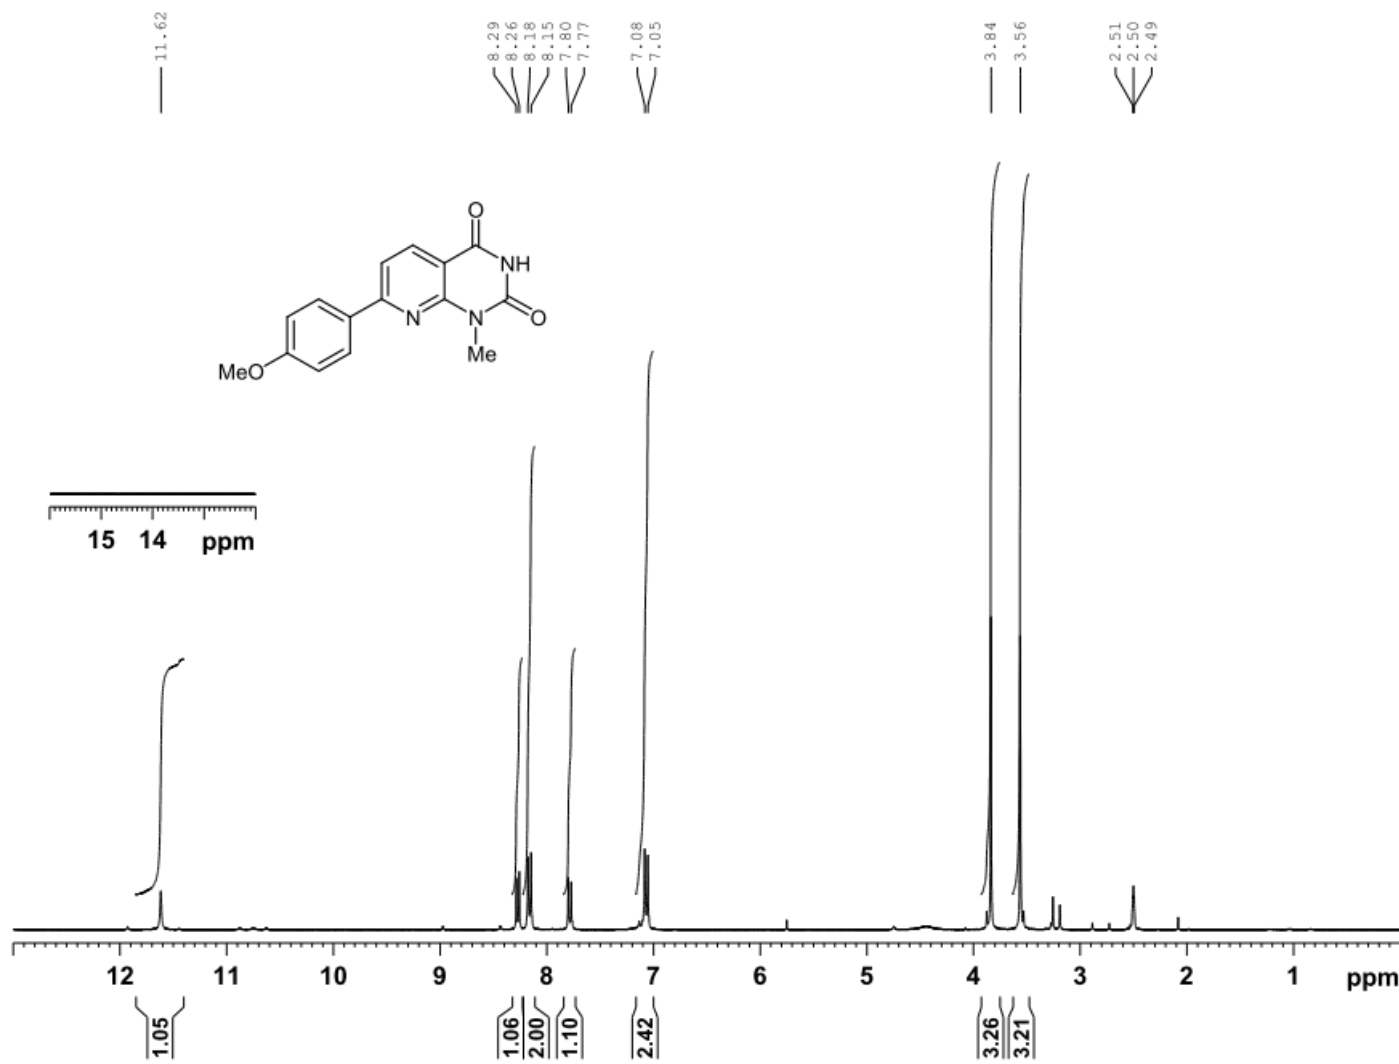

Current Data Parameters  
NAME 110218.u313 ag 182  
EXPNO 10  
PROCNO 1

F2 - Acquisition Parameters  
Date\_ 20110218  
Time 8.55  
INSTRUM spect  
PROBHD 5 mm PABBO BB-  
PULPROG zg30  
TD 65536  
SOLVENT DMSO  
NS 16  
DS 2  
SWH 6188.119 Hz  
FIDRES 0.094423 Hz  
AQ 5.2953587 sec  
RG 144  
DW 80.800 usec  
DE 10.00 usec  
TE 298.2 K  
D1 1.0000000 sec  
TD0 1

===== CHANNEL f1 =====  
NUC1 1H  
P1 10.00 usec  
PL1 0.00 dB  
PL1W 11.25325108 W  
SFO1 300.1318534 MHz

F2 - Processing parameters  
SI 32768  
SF 300.1300057 MHz  
WDW EM  
SSB 0  
LB 0.30 Hz  
GB 0  
PC 1.00

Gevorgyan AG182 (1) 13C DMSO

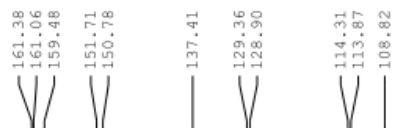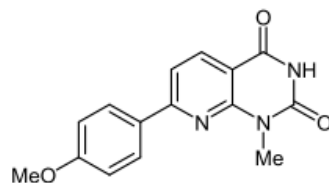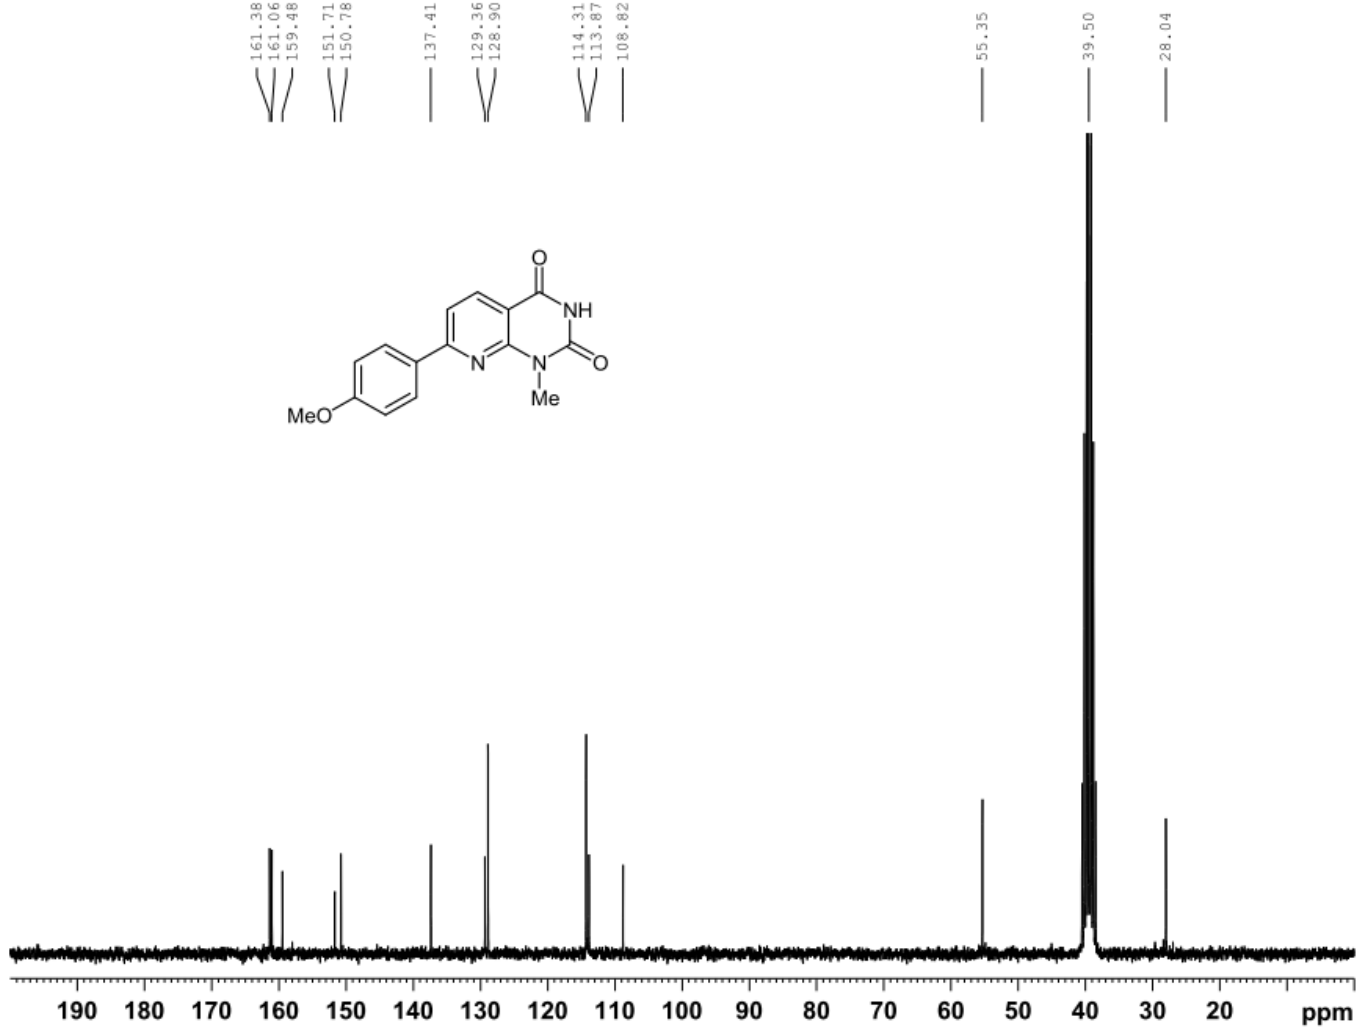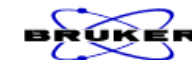

Current Data Parameters  
NAME 110221.208 ag 182 C  
EXPNO 10  
PROCNO 1

F2 - Acquisition Parameters  
Date\_ 20110221  
Time\_ 20.46  
INSTRUM spect  
PROBHD 5 mm PABBO BB-  
PULPROG zgpg30  
TD 65536  
SOLVENT DMSO  
NS 1024  
DS 4  
SWH 15000.000 Hz  
FIDRES 0.228882 Hz  
AQ 2.1845834 sec  
RG 2050  
DW 33.333 usec  
DE 10.00 usec  
TE 298.0 K  
D1 2.00000000 sec  
d11 0.03000000 sec  
DELTA 1.89999998 sec  
TD0 1

===== CHANNEL f1 =====  
NUC1 13C  
P1 10.00 usec  
PL1 -1.00 dB  
SFO1 62.9015280 MHz

===== CHANNEL f2 =====  
CPDPRG2 waltz16  
NUC2 1H  
PCPD2 70.00 usec  
PL12 15.00 dB  
PL13 15.00 dB  
PL2 -2.50 dB  
SFO2 250.1310005 MHz

F2 - Processing parameters  
SI 32768  
SF 62.8952687 MHz  
WDW EM  
SSB 0  
LB 1.00 Hz  
GB 0  
PC 1.40



Mkrtchyan SM532 1H DMSO

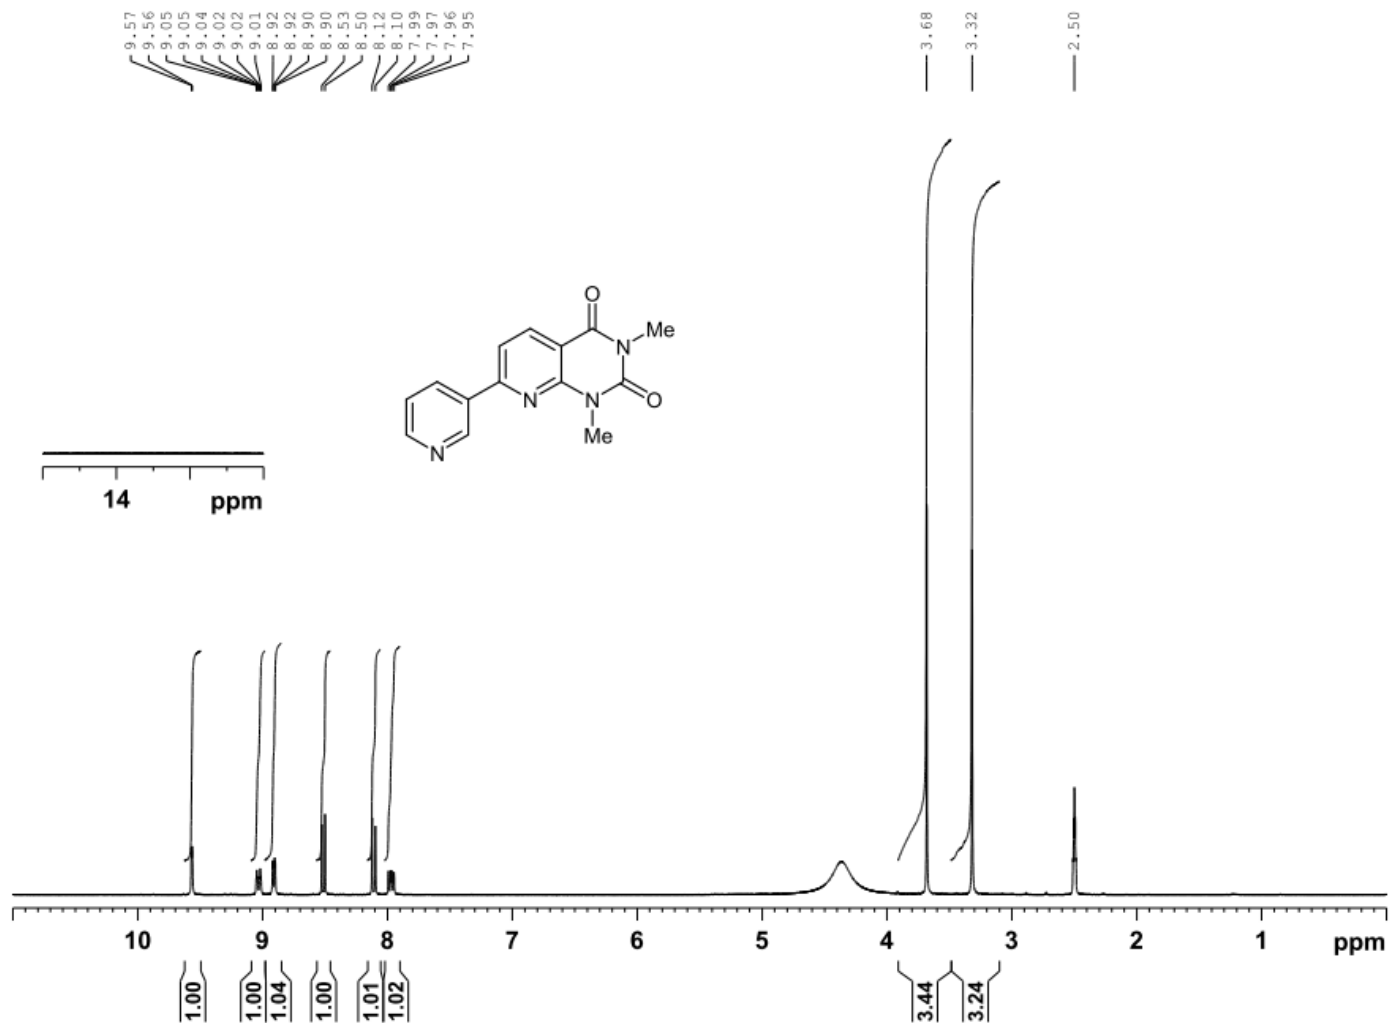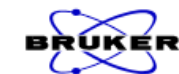

Current Data Parameters  
NAME 110715.u321 sm 532  
EXPNO 10  
PROCNO 1

F2 - Acquisition Parameters  
Date 20110715  
Time 13.38  
INSTRUM spect  
PROBHD 5 mm PABBO BB-  
PULPROG zg30  
TD 65536  
SOLVENT DMSO  
NS 16  
DS 2  
SWH 6188.119 Hz  
FIDRES 0.094423 Hz  
AQ 5.2953587 sec  
RG 256  
DW 80.800 usec  
DE 10.00 usec  
TE 298.2 K  
D1 1.0000000 sec  
TD0 1

CHANNEL f1  
NUC1 1H  
P1 10.00 usec  
PL1 0.00 dB  
PL1W 11.25325108 W  
SFO1 300.1318534 MHz

F2 - Processing parameters  
SI 32768  
SF 300.1300075 MHz  
WDW EM  
SSB 0  
LB 0.30 Hz  
GB 0  
PC 1.00

141

Mkrtchyan SM532 13C DMSO

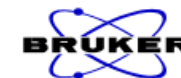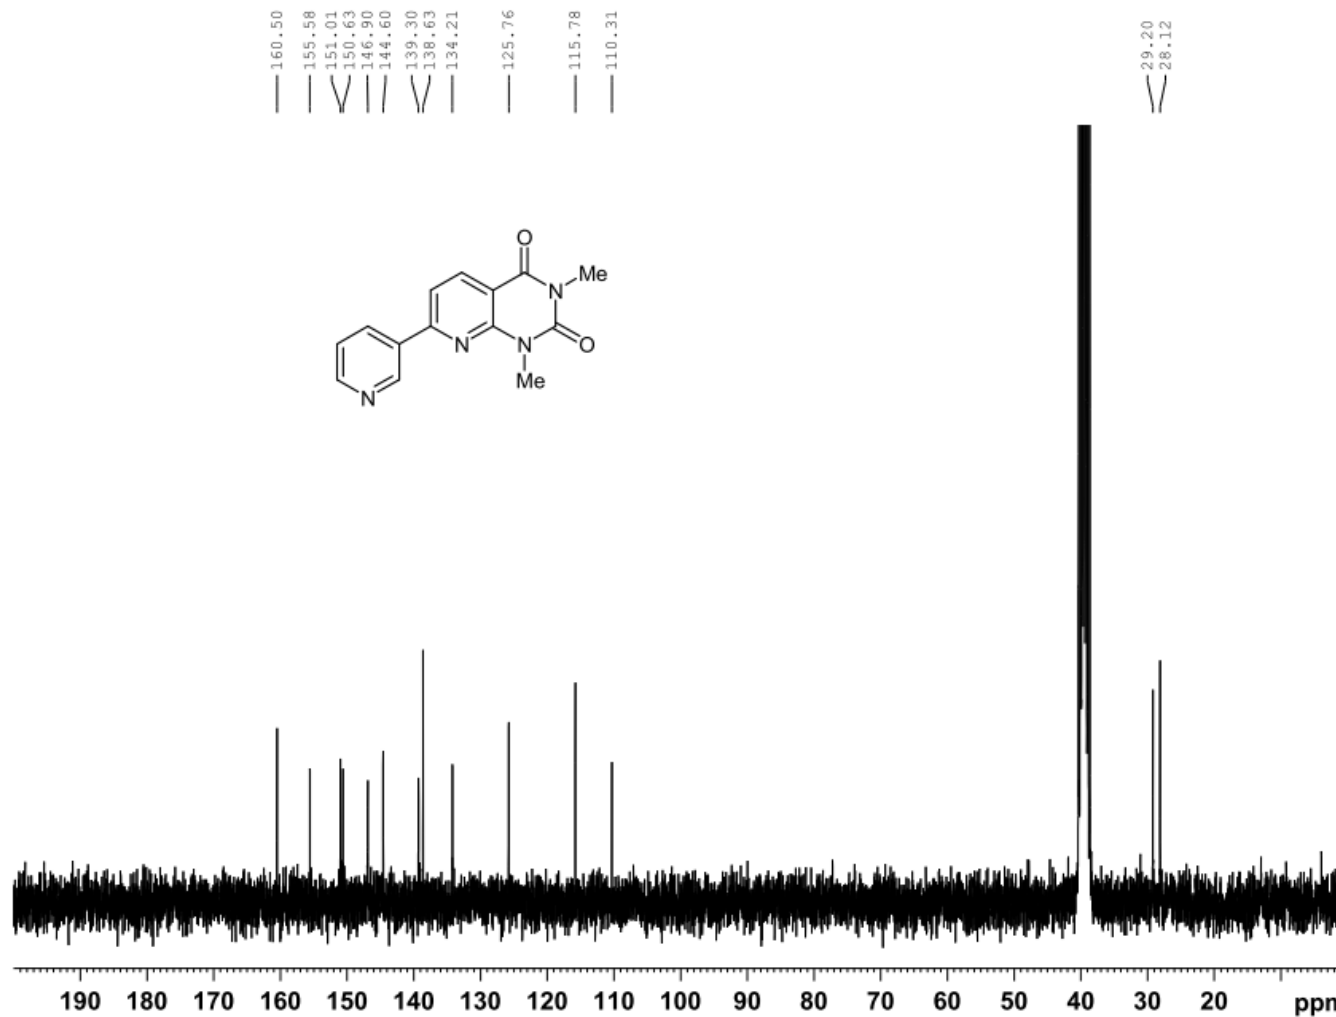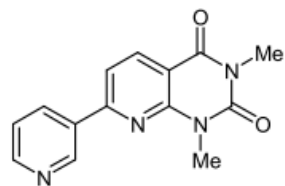

NAME 110715.u321 sm 532 C  
EXPNO 11  
PROCNO 1  
Date\_ 20110717  
Time 15.42  
INSTRUM spect  
PROBHD 5 mm PABBO BB-  
PULPROG zgpg30  
TD 65536  
SOLVENT DMSO  
NS 1024  
DS 4  
SWH 18028.846 Hz  
FIDRES 0.275098 Hz  
AQ 1.8175818 sec  
RG 2050  
DW 27.733 usec  
DE 10.00 usec  
TE 298.9 K  
D1 2.00000000 sec  
D11 0.03000000 sec  
TD0 1

===== CHANNEL f1 =====  
NUC1 13C  
P1 10.00 usec  
PL1 -0.50 dB  
PL1W 33.25691986 W  
SFO1 75.4752953 MHz

===== CHANNEL f2 =====  
CPDPRG2 waltz16  
NUC2 1H  
PCPD2 72.00 usec  
PL2 0.00 dB  
PL12 17.00 dB  
PL13 17.00 dB  
PL2W 11.25325108 W  
PL12W 0.22453187 W  
PL13W 0.22453187 W  
SFO2 300.1312005 MHz  
SI 32768  
SF 75.4677876 MHz  
WDW EM  
SSB 0  
LB 1.00 Hz  
GB 0  
PC 1.40

**(D) X-ray single crystal analysis of compounds 15a, 15c and 17a**

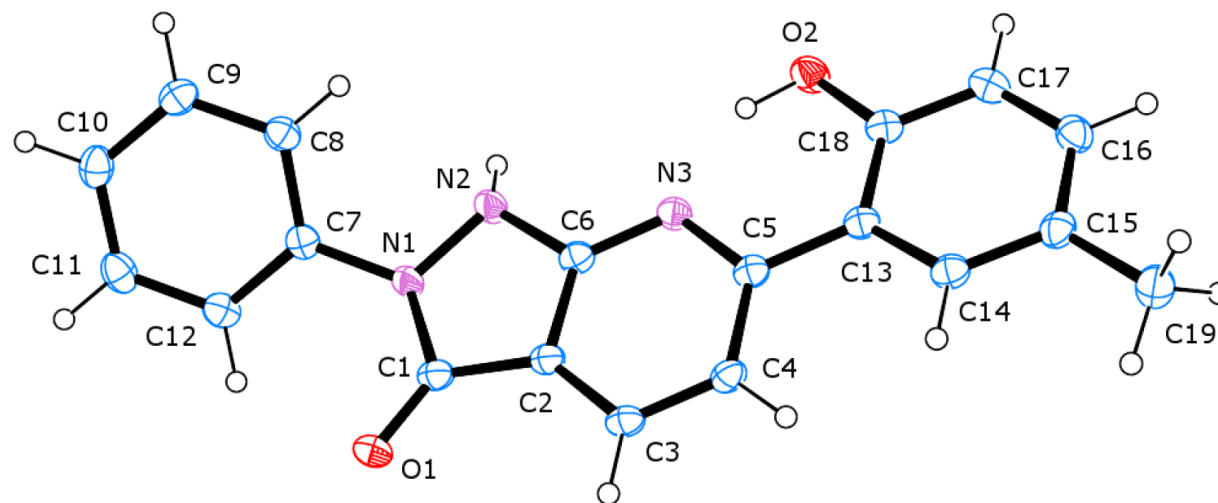

**Figure 1.** Molecular structure of compound **15a**

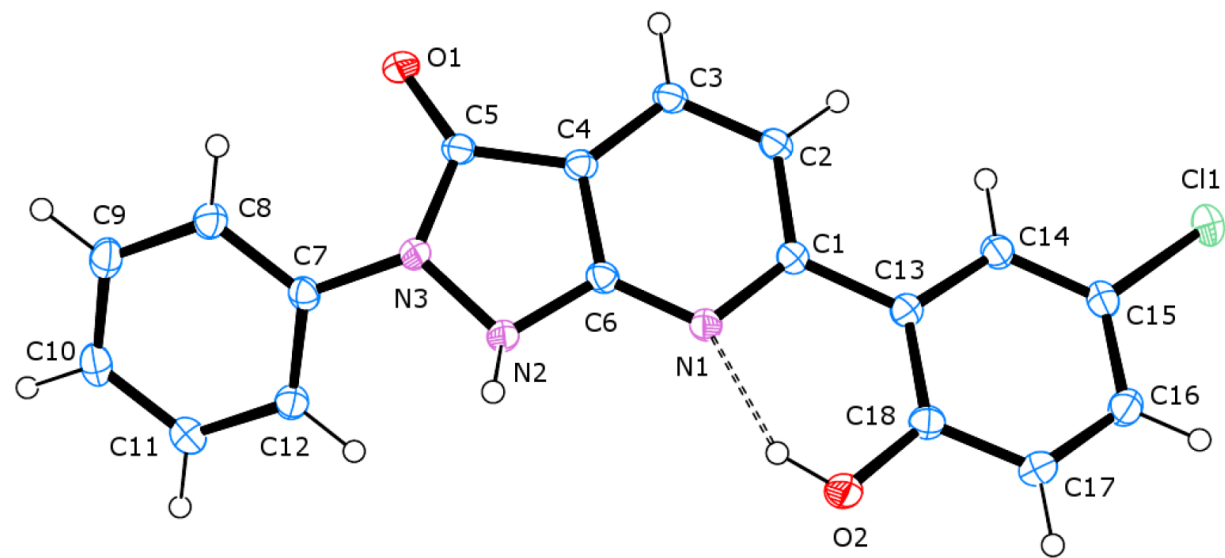

**Figure 2.** Molecular structure of compound **15c**

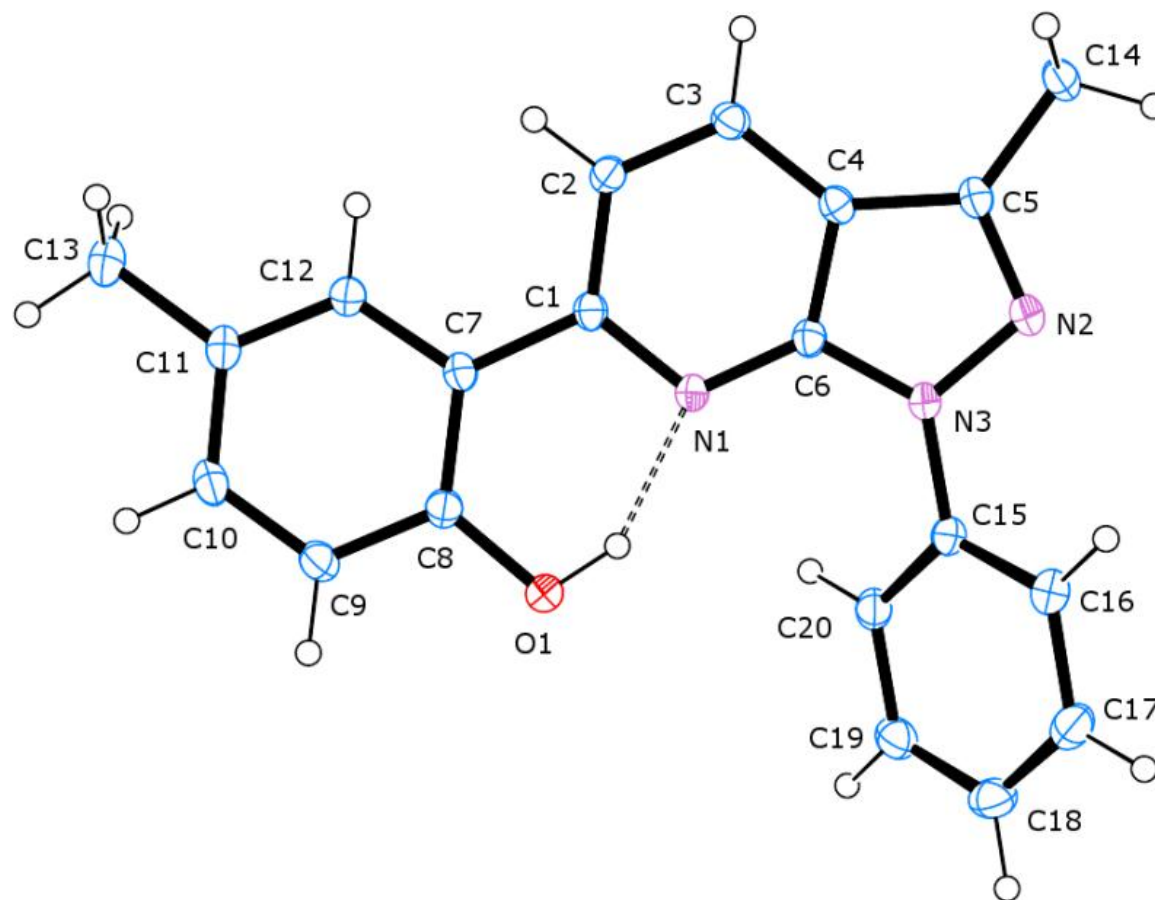

**Figure 3.** Molecular structure of compound **17a**
